# Supplementary material for: Medicines associated with dependence or withdrawal: a mixed-methods public health review and national database study in England
Source: PubMed Central journal article supplement — Lancet Psychiatry. 2019 Nov;6(11):935–50. doi: 10.1016/S2215-0366(19)30331-1 (PMC7029276; doi:10.1016/s2215-0366(19)30331-1), 2019-11
Supplement: mmc1.pdf [file mmc1.pdf]

# THE LANCET Psychiatry

## Supplementary appendix

This appendix formed part of the original submission and has been peer reviewed. We post it as supplied by the authors.

Supplement to: Marsden J, White M, Annand F, et al. Medicines associated with dependence or withdrawal: a mixed-methods public health review and national database study in England. *Lancet Psychiatry* 2019; published online Oct 3. [https://doi.org/10.1016/S2215-0366\(19\)30331-1](https://doi.org/10.1016/S2215-0366(19)30331-1).

# SUPPLEMENTARY APPENDIX

## Contents

| <b>Content</b>                                                                                                                                                                                                                                                                              | <b>Page</b> |
|---------------------------------------------------------------------------------------------------------------------------------------------------------------------------------------------------------------------------------------------------------------------------------------------|-------------|
| <b>Table S1.</b> NICE mapping of medicines for study (27 April 2018)                                                                                                                                                                                                                        | 2-62        |
| <b>Table S2.</b> Medicines included in the database analysis                                                                                                                                                                                                                                | 63-64       |
| <b>Table S3.</b> REA search strategy                                                                                                                                                                                                                                                        | 65-81       |
| <b>Table S4:</b> Estimates of continuous receipt of a prescription duration by medicine class (latest estimated retrospective duration in months as at March 2018: 1 month; 2 to 5 months; 6 to 11 months; 12 to 34 months; and 35-36 months) overall and by sex, age group and deprivation | 82-86       |
|                                                                                                                                                                                                                                                                                             |             |
| <b>Figure S1.</b> PRISMA flowchart of study selection                                                                                                                                                                                                                                       | 87          |
| <b>Figure S2.</b> Deprivation by CCG registered populations, England (1 April 2017)                                                                                                                                                                                                         | 88          |
|                                                                                                                                                                                                                                                                                             |             |
| <b>Web-material W1.</b> Withdrawal symptoms                                                                                                                                                                                                                                                 | 89-90       |
| <b>Web-material W2.</b> Risk factors                                                                                                                                                                                                                                                        | 91-92       |
| <b>Web-material W3.</b> Patients' experience                                                                                                                                                                                                                                                | 92          |
| <b>Web-material W4.</b> Service models and evaluations                                                                                                                                                                                                                                      | 92-93       |
| <b>Web-material W5.</b> References for all REA included studies                                                                                                                                                                                                                             | 93-99       |
|                                                                                                                                                                                                                                                                                             |             |
| <b>Table S5.</b> GRADE and GRADE CERQual profiles for the REA evidence                                                                                                                                                                                                                      | 100-207     |
| <b>Table S6.</b> Patient experience included study summary                                                                                                                                                                                                                                  | 208-210     |

Appendix Table S1: NICE mapping of medicines for study (27 April 2018)

| BNF Cat | Drug class      | Drug       | Legal category | Indications               | Usual dose                                                                                               | Additional notes on drug and/or dose | Index events - i.e. when in a patient's condition or journey they might be prescribed, or reviewed, or dose increased/decreased/ceased                                                                                                                                                                                                        |                                                                                                                                                                                                                                                                                                                                                                                                               |                                                                                                                                                                                                                                                                                                                                                                                                               |                                                                                                                                                                                                                                                                                                                                                                                                                                                                                                                                                                          | Recommended limits (on duration of prescribing)                                                                                           |                                                        |      |
|---------|-----------------|------------|----------------|---------------------------|----------------------------------------------------------------------------------------------------------|--------------------------------------|-----------------------------------------------------------------------------------------------------------------------------------------------------------------------------------------------------------------------------------------------------------------------------------------------------------------------------------------------|---------------------------------------------------------------------------------------------------------------------------------------------------------------------------------------------------------------------------------------------------------------------------------------------------------------------------------------------------------------------------------------------------------------|---------------------------------------------------------------------------------------------------------------------------------------------------------------------------------------------------------------------------------------------------------------------------------------------------------------------------------------------------------------------------------------------------------------|--------------------------------------------------------------------------------------------------------------------------------------------------------------------------------------------------------------------------------------------------------------------------------------------------------------------------------------------------------------------------------------------------------------------------------------------------------------------------------------------------------------------------------------------------------------------------|-------------------------------------------------------------------------------------------------------------------------------------------|--------------------------------------------------------|------|
|         |                 |            |                |                           |                                                                                                          |                                      | SPC                                                                                                                                                                                                                                                                                                                                           | BNF                                                                                                                                                                                                                                                                                                                                                                                                           | NICE                                                                                                                                                                                                                                                                                                                                                                                                          | Opioids aware                                                                                                                                                                                                                                                                                                                                                                                                                                                                                                                                                            | SPC                                                                                                                                       | BNF                                                    | NICE |
| 4.1.1   | Benzodiazepines | Nitrazepam | CD 4.1         | Insomnia (short-term use) | Adult<br>5–10 mg daily<br>Elderly<br>2.5–5mg daily                                                       |                                      |                                                                                                                                                                                                                                                                                                                                               | Short-term insomnia is usually related to an emotional problem or serious medical illness. It may last for a few weeks and may recur; a hypnotic can be useful but should not be given for more than 3 weeks (preferably only 1 week). Intermittent use is desirable with omission of some doses. A short-acting drug is usually appropriate.                                                                 | CKS:<br>Use the lowest effective dose for the shortest period possible. The exact duration will depend on the underlying cause but should not continue for longer than 2 weeks. Up to 4 weeks' use may occasionally be required, but continued use should always be re-assessed after 2 weeks.<br><br><a href="https://cks.nice.org.uk/insomnia#!scenario:1">https://cks.nice.org.uk/insomnia#!scenario:1</a> |                                                                                                                                                                                                                                                                                                                                                                                                                                                                                                                                                                          | Generally the duration of treatment varies from a few days to two weeks, with a maximum of four weeks; including the tapering off process | Avoid prolonged use (and abrupt withdrawal thereafter) |      |
| 4.1.1   | Benzodiazepines | Flurazepam | CD 4.1         | Insomnia (short-term use) | Adult<br>15–30 mg once daily<br>Elderly<br>15 mg once daily                                              |                                      | Short-term insomnia is usually related to an emotional problem or serious medical illness. It may last for a few weeks and may recur; a hypnotic can be useful but should not be given for more than 3 weeks (preferably only 1 week). Intermittent use is desirable with omission of some doses. A short-acting drug is usually appropriate. | CKS:<br>Use the lowest effective dose for the shortest period possible. The exact duration will depend on the underlying cause but should not continue for longer than 2 weeks. Up to 4 weeks' use may occasionally be required, but continued use should always be re-assessed after 2 weeks.<br><br><a href="https://cks.nice.org.uk/insomnia#!scenario:1">https://cks.nice.org.uk/insomnia#!scenario:1</a> |                                                                                                                                                                                                                                                                                                                                                                                                               | Treatment should, if possible, be on an intermittent basis.<br><br>Treatment should be as short as possible and should be started with the lowest recommended dose. The maximum dose should not be exceeded. Generally the duration of treatment varies from a few days to two weeks with a maximum of four weeks, including the tapering off process.<br><br>In certain cases, extension beyond the maximum treatment period may be necessary; if so, it should not take place without re-evaluation of the patient's status. Long-term chronic use is not recommended. | Avoid prolonged use (and abrupt withdrawal thereafter)                                                                                    |                                                        |      |
| 4.1.1   | Benzodiazepines | Loprazolam | CD 4.1         | Insomnia (short-term use) | Adult<br>1 mg once daily, increased to 1.5–2 mg once daily if required<br>Elderly<br>0.5–1 mg once daily |                                      | Short-term insomnia is usually related to an emotional problem or serious medical illness. It may last for a few weeks and may recur; a hypnotic can be useful but should not be given for more than 3 weeks (preferably only 1 week). Intermittent use is desirable with omission of some doses. A short-acting drug is usually appropriate. | CKS:<br>Use the lowest effective dose for the shortest period possible. The exact duration will depend on the underlying cause but should not continue for longer than 2 weeks. Up to 4 weeks' use may occasionally be required, but continued use should always be re-assessed after 2 weeks.                                                                                                                |                                                                                                                                                                                                                                                                                                                                                                                                               | Treatment should not normally be continued beyond 4 weeks.                                                                                                                                                                                                                                                                                                                                                                                                                                                                                                               | Avoid prolonged use (and abrupt withdrawal thereafter)                                                                                    |                                                        |      |

|       |                 |              |        |                                                          |                                                                                                                                                                                                                                                                 |                                                                                                                                                                                   |                                                                                                                                                                                                                                                                                                                                               |                                                                                                                                                                                                                                                                                                                                                                                                           |                                                                                                                                                                                                                                                                                                                                                                                                         |                                                                                                                                                                                                                                                                                       |                                                                                                                                                                                                                                                                                       |
|-------|-----------------|--------------|--------|----------------------------------------------------------|-----------------------------------------------------------------------------------------------------------------------------------------------------------------------------------------------------------------------------------------------------------------|-----------------------------------------------------------------------------------------------------------------------------------------------------------------------------------|-----------------------------------------------------------------------------------------------------------------------------------------------------------------------------------------------------------------------------------------------------------------------------------------------------------------------------------------------|-----------------------------------------------------------------------------------------------------------------------------------------------------------------------------------------------------------------------------------------------------------------------------------------------------------------------------------------------------------------------------------------------------------|---------------------------------------------------------------------------------------------------------------------------------------------------------------------------------------------------------------------------------------------------------------------------------------------------------------------------------------------------------------------------------------------------------|---------------------------------------------------------------------------------------------------------------------------------------------------------------------------------------------------------------------------------------------------------------------------------------|---------------------------------------------------------------------------------------------------------------------------------------------------------------------------------------------------------------------------------------------------------------------------------------|
| 4.1.1 | Benzodiazepines | Lormetazepam | CD 4.1 | Insomnia (short-term use)                                | Adult<br>0.5–1.5 mg once daily<br><br>Elderly<br>500 micrograms once daily                                                                                                                                                                                      |                                                                                                                                                                                   | Short-term insomnia is usually related to an emotional problem or serious medical illness. It may last for a few weeks and may recur; a hypnotic can be useful but should not be given for more than 3 weeks (preferably only 1 week). Intermittent use is desirable with omission of some doses. A short-acting drug is usually appropriate. | <a href="https://cks.nice.org.uk/insomnia#!scenario:1">https://cks.nice.org.uk/insomnia#!scenario:1</a><br>CKS:<br>Use the lowest effective dose for the shortest period possible. The exact duration will depend on the underlying cause but should not continue for longer than 2 weeks. Up to 4 weeks' use may occasionally be required, but continued use should always be re-assessed after 2 weeks. | Generally, the duration of treatment varies from a few days to 2 weeks, with a maximum of 4 weeks including the tapering off process. Extension of the treatment period should not take place without re-evaluation of the need for continued therapy.                                                                                                                                                  | Avoid prolonged use (and abrupt withdrawal thereafter)                                                                                                                                                                                                                                |                                                                                                                                                                                                                                                                                       |
| 4.1.1 | Benzodiazepines | Temazepam    | CD 3   | Insomnia (short-term use)                                | Adult<br>10–20 mg once daily<br><br>Elderly<br>10 mg once daily                                                                                                                                                                                                 | Dosage should be checked regularly at the start of treatment in order to decrease, if necessary, the dose or frequency of administration to prevent overdose due to accumulation. | Short-term insomnia is usually related to an emotional problem or serious medical illness. It may last for a few weeks and may recur; a hypnotic can be useful but should not be given for more than 3 weeks (preferably only 1 week). Intermittent use is desirable with omission of some doses. A short-acting drug is usually appropriate. | <a href="https://cks.nice.org.uk/insomnia#!scenario:1">https://cks.nice.org.uk/insomnia#!scenario:1</a><br>CKS:<br>Use the lowest effective dose for the shortest period possible. The exact duration will depend on the underlying cause but should not continue for longer than 2 weeks. Up to 4 weeks' use may occasionally be required, but continued use should always be re-assessed after 2 weeks. | Treatment should be as short as possible. Generally the duration of treatment varies from a few days to two weeks with a maximum, including tapering-off, of four weeks. The tapering-off process should be tailored to the individual. In certain cases extension beyond the maximum treatment period may be necessary; if so, it should not take place without re-evaluation of the patient's status. | Avoid prolonged use (and abrupt withdrawal thereafter)                                                                                                                                                                                                                                |                                                                                                                                                                                                                                                                                       |
| 4.1.1 | Benzodiazepines | Temazepam    | CD 3   | Conscious sedation for dental procedures                 | Adult<br>15–30 mg before procedure                                                                                                                                                                                                                              |                                                                                                                                                                                   |                                                                                                                                                                                                                                                                                                                                               |                                                                                                                                                                                                                                                                                                                                                                                                           |                                                                                                                                                                                                                                                                                                                                                                                                         |                                                                                                                                                                                                                                                                                       |                                                                                                                                                                                                                                                                                       |
| 4.1.1 | Benzodiazepines | Temazepam    | CD 3   | Premedication before surgery or investigatory procedures | Adult<br>10–20 mg before procedure<br>Elderly<br>10 mg before procedure                                                                                                                                                                                         |                                                                                                                                                                                   |                                                                                                                                                                                                                                                                                                                                               |                                                                                                                                                                                                                                                                                                                                                                                                           |                                                                                                                                                                                                                                                                                                                                                                                                         |                                                                                                                                                                                                                                                                                       |                                                                                                                                                                                                                                                                                       |
| 4.1.1 | Z-drugs         | Zaleplon     | CD 4.1 | Insomnia (short-term use)                                | By mouth<br>Adult<br>10 mg daily for up to 2 weeks, dose to be taken at bedtime or after going to bed if difficulty falling asleep.<br>Elderly<br>5 mg daily for up to 2 weeks, dose to be taken at bedtime or after going to bed if difficulty falling asleep. |                                                                                                                                                                                   | Short-term insomnia is usually related to an emotional problem or serious medical illness. It may last for a few weeks and may recur; a hypnotic can be useful but should not be given for more than 3 weeks (preferably only 1 week). Intermittent use is desirable with omission of some doses. A short-acting drug is usually appropriate. | CKS:<br>Use the lowest effective dose for the shortest period possible. The exact duration will depend on the underlying cause but should not continue for longer than 2 weeks. Up to 4 weeks' use may occasionally be required, but continued use should always be re-assessed after 2 weeks.                                                                                                            | Up to 2 weeks<br>Avoid prolonged use (risk of tolerance and withdrawal symptoms)                                                                                                                                                                                                                                                                                                                        | ... it is recommended that hypnotics should be prescribed for short periods of time only, in strict accordance with their licensed indications. NICE TA77 <a href="https://www.nice.org.uk/guidance/ta77/apter/1-Guidance">https://www.nice.org.uk/guidance/ta77/apter/1-Guidance</a> |                                                                                                                                                                                                                                                                                       |
| 4.1.1 | Z-drugs         | Zolpidem     | CD 4.1 | Insomnia (short-term use)                                | By mouth<br>Adult<br>10 mg daily for up to 2 weeks, dose to be taken at bedtime or after going to bed if difficulty falling asleep.                                                                                                                             |                                                                                                                                                                                   | Short-term insomnia is usually related to an emotional problem or serious medical illness. It may last for a few weeks and may recur; a hypnotic can be useful but should not be given for more than 3 weeks (preferably only 1 week). Intermittent use is desirable with omission of some doses. A short-acting drug is usually appropriate. | CKS:<br>Use the lowest effective dose for the shortest period possible. The exact duration will depend on the underlying cause but should not continue for longer than 2 weeks. Up to 4 weeks' use may occasionally be required, but continued use should always be re-assessed after 2 weeks.                                                                                                            | The duration of treatment should usually vary from a few days to 2 weeks, with a maximum of 4 weeks including the tapering off process. Extension of the treatment period should not take place without re-evaluation of the need for continued therapy.                                                                                                                                                | Up to 4 weeks<br>Avoid prolonged use (and abrupt withdrawal thereafter)                                                                                                                                                                                                               | ... it is recommended that hypnotics should be prescribed for short periods of time only, in strict accordance with their licensed indications. NICE TA77 <a href="https://www.nice.org.uk/guidance/ta77/apter/1-Guidance">https://www.nice.org.uk/guidance/ta77/apter/1-Guidance</a> |



|       |                 |               |        |                                                                               |                                                                                                                                                                                                    |                                                                                                                                                                                                        |                                                                                                                                                                                                                                                                                 |                                                                                                                                                                                                                                                                                                              |                                                        |                                                                                                                                                                                                                                                                                                                                            |
|-------|-----------------|---------------|--------|-------------------------------------------------------------------------------|----------------------------------------------------------------------------------------------------------------------------------------------------------------------------------------------------|--------------------------------------------------------------------------------------------------------------------------------------------------------------------------------------------------------|---------------------------------------------------------------------------------------------------------------------------------------------------------------------------------------------------------------------------------------------------------------------------------|--------------------------------------------------------------------------------------------------------------------------------------------------------------------------------------------------------------------------------------------------------------------------------------------------------------|--------------------------------------------------------|--------------------------------------------------------------------------------------------------------------------------------------------------------------------------------------------------------------------------------------------------------------------------------------------------------------------------------------------|
| 4.1.1 | Clomethiazole   | Clomethiazole | POM    | Severe insomnia (short-term use)                                              | Capsules<br>Elderly<br>192–384 mg once daily<br>Oral solution<br>Elderly<br>5–10 mL once daily                                                                                                     | As with all psychotropic drugs, treatment should be kept to a minimum, reviewed regularly and discontinued as soon as possible.                                                                        |                                                                                                                                                                                                                                                                                 | As with all psychotropic drugs, treatment should be kept to a minimum, reviewed regularly and discontinued as soon as possible.                                                                                                                                                                              | Avoid prolonged use (and abrupt withdrawal thereafter) |                                                                                                                                                                                                                                                                                                                                            |
| 4.1.1 | Clomethiazole   | Clomethiazole | POM    | Restlessness and agitation                                                    | Capsules<br>Elderly<br>192 mg 3 times a day<br>Oral solution<br>Elderly<br>5 mL 3 times a day                                                                                                      |                                                                                                                                                                                                        |                                                                                                                                                                                                                                                                                 |                                                                                                                                                                                                                                                                                                              | Avoid prolonged use (and abrupt withdrawal thereafter) |                                                                                                                                                                                                                                                                                                                                            |
| 4.1.1 | Clomethiazole   | Clomethiazole | POM    | Alcohol withdrawal                                                            | <del>Capsules<br/>192 mg 3 times a day</del><br><del>Oral solution<br/>5 mL 3 times a day</del>                                                                                                    |                                                                                                                                                                                                        |                                                                                                                                                                                                                                                                                 |                                                                                                                                                                                                                                                                                                              | Avoid prolonged use (and abrupt withdrawal thereafter) |                                                                                                                                                                                                                                                                                                                                            |
| 4.1.2 | Benzodiazepines | Diazepam      | CD 4.1 | Muscle spasm of varied aetiology                                              | 2–15 mg daily in divided doses, then increased if necessary to 60 mg daily                                                                                                                         |                                                                                                                                                                                                        |                                                                                                                                                                                                                                                                                 |                                                                                                                                                                                                                                                                                                              | Avoid prolonged use (and abrupt withdrawal thereafter) |                                                                                                                                                                                                                                                                                                                                            |
| 4.1.2 | Benzodiazepines | Diazepam      | CD 4.1 | Acute muscle spasm                                                            | IM or IV<br>10 mg, then 10 mg after 4 hours if required                                                                                                                                            |                                                                                                                                                                                                        |                                                                                                                                                                                                                                                                                 |                                                                                                                                                                                                                                                                                                              | Avoid prolonged use (and abrupt withdrawal thereafter) |                                                                                                                                                                                                                                                                                                                                            |
| 4.1.2 | Benzodiazepines | Diazepam      | CD 4.1 | Tetanus                                                                       | IV injection<br>100–300 micrograms/kg every 1–4 hours<br><br>IV infusion or nasoduodenal tube<br>3–10 mg/kg over 24 hours<br>Child dose only                                                       |                                                                                                                                                                                                        |                                                                                                                                                                                                                                                                                 |                                                                                                                                                                                                                                                                                                              | Avoid prolonged use (and abrupt withdrawal thereafter) |                                                                                                                                                                                                                                                                                                                                            |
| 4.1.2 | Benzodiazepines | Diazepam      | CD 4.1 | Muscle spasm in cerebral spasticity or in postoperative skeletal muscle spasm |                                                                                                                                                                                                    |                                                                                                                                                                                                        |                                                                                                                                                                                                                                                                                 |                                                                                                                                                                                                                                                                                                              | Avoid prolonged use (and abrupt withdrawal thereafter) |                                                                                                                                                                                                                                                                                                                                            |
| 4.1.2 | Benzodiazepines | Diazepam      | CD 4.1 | Anxiety                                                                       | Adult<br>2 mg 3 times a day, then increased if necessary to 15–30 mg daily in divided doses<br><br>Elderly<br>1 mg 3 times a day, then increased if necessary to 7.5–15 mg daily in divided doses. | The patient must be evaluated after a period of no more than 4 weeks and then regularly thereafter in order to assess the need for continued treatment, especially if the patient is free of symptoms. | Benzodiazepines are indicated for the short-term relief (two to four weeks only) of anxiety that is severe, disabling, or causing the patient unacceptable distress, occurring alone or in association with insomnia or short-term psychosomatic, organic, or psychotic illness | As an anxiolytic, the lowest effective dose should be employed; dosage regimes should not exceed beyond 4 weeks and treatment should be gradually withdrawn. Patients who have received benzodiazepines for a long time may require an extended withdrawal period. Long-term chronic use is not recommended. | Avoid prolonged use (and abrupt withdrawal thereafter) | Do not offer a benzodiazepine for the treatment of GAD in primary or secondary care except as a short-term measure during crises. Follow the advice in the 'British national formulary' on the use of a benzodiazepine in this context.<br><br><a href="https://www.nice.org.uk/guidance/cg113">https://www.nice.org.uk/guidance/cg113</a> |

|       |                 |          |        |                                       |                                                                                                                                                                                                                                    |  |                                                                                                                                                                                                                                                                                                                                                                                                               |                                                        |                                                                                                                                                                                     |
|-------|-----------------|----------|--------|---------------------------------------|------------------------------------------------------------------------------------------------------------------------------------------------------------------------------------------------------------------------------------|--|---------------------------------------------------------------------------------------------------------------------------------------------------------------------------------------------------------------------------------------------------------------------------------------------------------------------------------------------------------------------------------------------------------------|--------------------------------------------------------|-------------------------------------------------------------------------------------------------------------------------------------------------------------------------------------|
| 4.1.2 | Benzodiazepines | Diazepam | CD 4.1 | Insomnia associated with anxiety      | Adult<br>5–15 mg daily                                                                                                                                                                                                             |  | CKS:<br>Use the lowest effective dose for the shortest period possible. The exact duration will depend on the underlying cause but should not continue for longer than 2 weeks. Up to 4 weeks' use may occasionally be required, but continued use should always be re-assessed after 2 weeks.<br><br><a href="https://cks.nice.org.uk/insomnia#!scenario:1">https://cks.nice.org.uk/insomnia#!scenario:1</a> | Avoid prolonged use (and abrupt withdrawal thereafter) |                                                                                                                                                                                     |
| 4.1.2 | Benzodiazepines | Diazepam | CD 4.1 | Severe acute anxiety                  | By intramuscular injection, or by slow intravenous injection<br>Adult<br>10 mg, then 10 mg after at least 4 hours if required, intravenous injection to be administered into a large vein, at a rate of not more than 5 mg/minute. |  |                                                                                                                                                                                                                                                                                                                                                                                                               | Avoid prolonged use (and abrupt withdrawal thereafter) |                                                                                                                                                                                     |
| 4.1.2 | Benzodiazepines | Diazepam | CD 4.1 | Control of acute panic attacks        | By intramuscular injection, or by slow intravenous injection<br>Adult<br>10 mg, then 10 mg after at least 4 hours if required, intravenous injection to be administered into a large vein, at a rate of not more than 5 mg/minute. |  |                                                                                                                                                                                                                                                                                                                                                                                                               | Avoid prolonged use (and abrupt withdrawal thereafter) | Benzodiazepines are associated with a less good outcome in the long term and should not be prescribed for the treatment of individuals with panic disorder<br>Rec 1.4.7 NICE CG 113 |
| 4.1.2 | Benzodiazepines | Diazepam | CD 4.1 | Acute alcohol withdrawal              | By intramuscular injection, or by slow intravenous injection<br>Adult<br>10 mg, then 10 mg after at least 4 hours if required, intravenous injection to be administered into a large vein, at a rate of not more than 5 mg/minute. |  |                                                                                                                                                                                                                                                                                                                                                                                                               | Avoid prolonged use (and abrupt withdrawal thereafter) |                                                                                                                                                                                     |
| 4.1.2 | Benzodiazepines | Diazepam | CD 4.1 | Acute drug-induced dystonic reactions | By intravenous injection<br>Adult<br>5–10 mg, then 5–10 mg after at least 10 minutes as required, to be                                                                                                                            |  |                                                                                                                                                                                                                                                                                                                                                                                                               | Avoid prolonged use (and abrupt withdrawal thereafter) |                                                                                                                                                                                     |

|       |                 |          |        |                                                                              |                                                                                                                                                                                                                                                                                                                                                                 |  |                                                        |
|-------|-----------------|----------|--------|------------------------------------------------------------------------------|-----------------------------------------------------------------------------------------------------------------------------------------------------------------------------------------------------------------------------------------------------------------------------------------------------------------------------------------------------------------|--|--------------------------------------------------------|
| 4.1.2 | Benzodiazepines | Diazepam | CD 4.1 | Acute anxiety and agitation                                                  | administered into a large vein, at a rate of not more than 5 mg/minute.<br>By rectum<br>Adult<br>500 micrograms/kg, then 500 micrograms/kg after 12 hours as required.<br><br>Elderly<br>250 micrograms/kg, then 250 micrograms/kg after 12 hours as required.                                                                                                  |  | Avoid prolonged use (and abrupt withdrawal thereafter) |
| 4.1.2 | Benzodiazepines | Diazepam | CD 4.1 | Premedication                                                                | By mouth<br>Adult<br>5–10 mg, to be given 1–2 hours before procedure, for debilitated patients, use elderly dose.<br>Elderly<br>2.5–5 mg, to be given 1–2 hours before procedure.<br><br>By intravenous injection<br>Adult<br>100–200 micrograms/kg, to be administered into a large vein at a rate of not more than 5 mg/minute, immediately before procedure. |  | Avoid prolonged use (and abrupt withdrawal thereafter) |
| 4.1.2 | Benzodiazepines | Diazepam | CD 4.1 | Sedation in dental procedures carried out in hospital                        | By mouth<br>Adult<br>Up to 20 mg, to be given 1–2 hours before procedure.                                                                                                                                                                                                                                                                                       |  | Avoid prolonged use (and abrupt withdrawal thereafter) |
| 4.1.2 | Benzodiazepines | Diazepam | CD 4.1 | Conscious sedation for procedures, and in conjunction with local anaesthesia | By mouth<br>Adult<br>5–10 mg, to be given 1–2 hours before procedure, for debilitated patients, use elderly dose.<br>Elderly<br>2.5–5 mg, to be given 1–2 hours before procedure.                                                                                                                                                                               |  | Avoid prolonged use (and abrupt withdrawal thereafter) |
| 4.1.2 | Benzodiazepines | Diazepam | CD 4.1 | Sedative cover for minor surgical and                                        | By intravenous injection<br>Adult<br>10–20 mg, to be                                                                                                                                                                                                                                                                                                            |  | Avoid prolonged use (and abrupt withdrawal thereafter) |



|       |                 |          |        |                                          |                                                                                                                                                                                                                                                                                                                                                                                 |                                                        |
|-------|-----------------|----------|--------|------------------------------------------|---------------------------------------------------------------------------------------------------------------------------------------------------------------------------------------------------------------------------------------------------------------------------------------------------------------------------------------------------------------------------------|--------------------------------------------------------|
| 4.1.2 | Benzodiazepines | Diazepam | CD 4.1 | medical procedures<br>Status epilepticus | administered into a large vein over 2–4 minutes, immediately before procedure.<br>By intravenous injection<br>Adult<br>10 mg, then 10 mg after 10 minutes if required, administered at a rate of 1 mL (5 mg) per minute.<br><br>By rectum<br>Adult<br>10–20 mg, then 10–20 mg after 10–15 minutes if required.<br>Elderly<br>10 mg, then 10 mg after 10–15 minutes if required. | Avoid prolonged use (and abrupt withdrawal thereafter) |
| 4.1.2 | Benzodiazepines | Diazepam | CD 4.1 | Febrile convulsions                      | By intravenous injection<br>Adult<br>10 mg, then 10 mg after 10 minutes if required, administered at a rate of 1 mL (5 mg) per minute.<br><br>By rectum<br>Adult<br>10–20 mg, then 10–20 mg after 10–15 minutes if required.<br>Elderly<br>10 mg, then 10 mg after 10–15 minutes if required.                                                                                   | Avoid prolonged use (and abrupt withdrawal thereafter) |
| 4.1.2 | Benzodiazepines | Diazepam | CD 4.1 | Convulsions due to poisoning             | By intravenous injection<br>Adult<br>10 mg, then 10 mg after 10 minutes if required, administered at a rate of 1 mL (5 mg) per minute.<br><br>By rectum<br>Adult<br>10–20 mg, then 10–20 mg after 10–15 minutes if required.<br>Elderly<br>10 mg, then 10 mg after 10–15                                                                                                        | Avoid prolonged use (and abrupt withdrawal thereafter) |

|       |                 |                      |        |                                                        |                                                                                                                                                                                    |                                                                                                                                                                                                                                                                                                                                                  |  |  |  |                                                                                                                                                                                                                                                                                                                                                                                                                                                     |  |                                                        |                                                                                                                                                                                                                                                                                                                                                                                                          |
|-------|-----------------|----------------------|--------|--------------------------------------------------------|------------------------------------------------------------------------------------------------------------------------------------------------------------------------------------|--------------------------------------------------------------------------------------------------------------------------------------------------------------------------------------------------------------------------------------------------------------------------------------------------------------------------------------------------|--|--|--|-----------------------------------------------------------------------------------------------------------------------------------------------------------------------------------------------------------------------------------------------------------------------------------------------------------------------------------------------------------------------------------------------------------------------------------------------------|--|--------------------------------------------------------|----------------------------------------------------------------------------------------------------------------------------------------------------------------------------------------------------------------------------------------------------------------------------------------------------------------------------------------------------------------------------------------------------------|
| 4.1.2 | Benzodiazepines | Diazepam             | CD 4.1 | Life-threatening acute drug-induced dystonic reactions | minutes if required.<br>Child dose only                                                                                                                                            |                                                                                                                                                                                                                                                                                                                                                  |  |  |  |                                                                                                                                                                                                                                                                                                                                                                                                                                                     |  | Avoid prolonged use (and abrupt withdrawal thereafter) |                                                                                                                                                                                                                                                                                                                                                                                                          |
| 4.1.2 | Benzodiazepines | Diazepam             | CD 4.1 | Dyspnoea associated with anxiety in palliative care    | By mouth<br>Adult<br>5–10 mg daily                                                                                                                                                 |                                                                                                                                                                                                                                                                                                                                                  |  |  |  |                                                                                                                                                                                                                                                                                                                                                                                                                                                     |  | Avoid prolonged use (and abrupt withdrawal thereafter) |                                                                                                                                                                                                                                                                                                                                                                                                          |
| 4.1.2 | Benzodiazepines | Diazepam             | CD 4.1 | Pain of muscle spasm in palliative care                | By mouth<br>Adult<br>5–10 mg daily                                                                                                                                                 |                                                                                                                                                                                                                                                                                                                                                  |  |  |  |                                                                                                                                                                                                                                                                                                                                                                                                                                                     |  | Avoid prolonged use (and abrupt withdrawal thereafter) |                                                                                                                                                                                                                                                                                                                                                                                                          |
| 4.1.2 | Benzodiazepines | Alprazolam           | CD 4.1 | Short-term use in anxiety                              | Adult<br>250–500 micrograms 3 times a day, increased if necessary up to 3 mg daily<br><br>Elderly<br>250 micrograms 2–3 times a day, increased if necessary up to 3 mg daily       | It is recommended that the patient be reassessed at the end of no longer than 4 weeks' treatment and the need for continued treatment established, especially in case the patient is symptom free. Dosage should be reassessed at intervals of no more than 4 weeks.                                                                             |  |  |  | The overall duration of treatment should not be more than 8–12 weeks, including a tapering off process.                                                                                                                                                                                                                                                                                                                                             |  | Avoid prolonged use (and abrupt withdrawal thereafter) | Do not offer a benzodiazepine for the treatment of GAD in primary or secondary care except as a short-term measure during crises. Follow the advice in the 'British national formulary' on the use of a benzodiazepine in this context.                                                                                                                                                                  |
| 4.1.2 | Benzodiazepines | Chlordiazepoxide HCl | CD 4.1 | Short-term use in anxiety                              | Adult<br>10 mg 3 times a day, increased if necessary to 60–100 mg daily in divided doses<br>Elderly<br>5mg 3 times a day, increased if necessary to 30–50mg daily in divided doses | The patient should be reassessed regularly and the need for continued treatment should be evaluated, especially in case the patient is symptom free. Extension of use should not take place without further clinical evaluation. Chronic use is not recommended (little is known of the long term safety and efficacy: potential for dependence) |  |  |  | For short term use (2–4 weeks only)<br><br>Treatment should not continue as full dose for more than 4 weeks including 2 week tapering off process                                                                                                                                                                                                                                                                                                   |  | Avoid prolonged use (and abrupt withdrawal thereafter) | <a href="https://www.nice.org.uk/guidance/cg113">https://www.nice.org.uk/guidance/cg113</a><br>Do not offer a benzodiazepine for the treatment of GAD in primary or secondary care except as a short-term measure during crises. Follow the advice in the 'British national formulary' on the use of a benzodiazepine in this context.                                                                   |
| 4.1.2 | Benzodiazepines | Chlordiazepoxide HCl | CD 4.1 | Treatment of alcohol withdrawal in moderate dependence | By mouth<br>Adult<br>10–30 mg 4 times a day, dose to be gradually reduced over 5–7 days, consult local protocols for titration regimens                                            |                                                                                                                                                                                                                                                                                                                                                  |  |  |  | Gradually reduce the dose of the benzodiazepine over 7–10 days to avoid alcohol withdrawal recurring. (part of rec 1.3.5.4 in CG 115)<br><br>Co-existing benzodiazepine and alcohol dependence: When withdrawal is managed in the community, and/or where there is a high level of benzodiazepine dependence, the regimen should last for longer than 3 weeks, tailored to the service user's symptoms and discomfort (Part fo rec 1.3.5.11 CG 115) |  | Avoid prolonged use (and abrupt withdrawal thereafter) | <a href="https://www.nice.org.uk/guidance/cg113">https://www.nice.org.uk/guidance/cg113</a><br>When managing alcohol withdrawal in the community, avoid giving people who misuse alcohol large quantities of medication to take home to prevent overdose or diversion[11]. Prescribe for installment dispensing, with no more than 2 days' medication supplied at any time. From NICE CG 115 Rec 1.3.5.5 |

|       |                 |                      |        |                                                      |                                                                                                                                                                                                                |                                                                                                                                                                                                                                                                                                |                |                                                        |                                                                                                                                                                                                                                                                                                                                        |
|-------|-----------------|----------------------|--------|------------------------------------------------------|----------------------------------------------------------------------------------------------------------------------------------------------------------------------------------------------------------------|------------------------------------------------------------------------------------------------------------------------------------------------------------------------------------------------------------------------------------------------------------------------------------------------|----------------|--------------------------------------------------------|----------------------------------------------------------------------------------------------------------------------------------------------------------------------------------------------------------------------------------------------------------------------------------------------------------------------------------------|
| 4.1.2 | Benzodiazepines | Chlordiazepoxide HCl | CD 4.1 | Treatment of alcohol withdrawal in severe dependence | By mouth<br>Adult<br>10–50 mg 4 times a day and 10–40 mg as required for the first 2 days, dose to be gradually reduced over 7–10 days, consult local protocols for titration regimens; maximum 250 mg per day | Gradually reduce the dose of the benzodiazepine over 7–10 days to avoid alcohol withdrawal recurring. (part of rec 1.3.5.4 in CG 115)                                                                                                                                                          |                | Avoid prolonged use (and abrupt withdrawal thereafter) | When managing alcohol withdrawal in the community, avoid giving people who misuse alcohol large quantities of medication to take home to prevent overdose or diversion[11]. Prescribe for installment dispensing, with no more than 2 days' medication supplied at any time. From NICE CG 115 Rec 1.3.5.5                              |
| 4.1.2 | Benzodiazepines | Lorazepam            | CD 4.1 | Short-term use in anxiety                            | Adult<br>1–4 mg daily in divided doses.<br><br>Elderly<br>0.5–2 mg daily in divided doses                                                                                                                      |                                                                                                                                                                                                                                                                                                | 2-4 weeks only | Avoid prolonged use (and abrupt withdrawal thereafter) | Do not offer a benzodiazepine for the treatment of GAD in primary or secondary care except as a short-term measure during crises. Follow the advice in the 'British national formulary' on the use of a benzodiazepine in this context.                                                                                                |
| 4.1.2 | Benzodiazepines | Lorazepam            | CD 4.1 | Short-term use in insomnia associated with anxiety   | Adult<br>1–2 mg daily                                                                                                                                                                                          | CKS:<br>Use the lowest effective dose for the shortest period possible. The exact duration will depend on the underlying cause but should not continue for longer than 2 weeks. Up to 4 weeks' use may occasionally be required, but continued use should always be re-assessed after 2 weeks. | 2-4 weeks only | Avoid prolonged use (and abrupt withdrawal thereafter) | <a href="https://www.nice.org.uk/guidance/cg113">https://www.nice.org.uk/guidance/cg113</a><br>Do not offer a benzodiazepine for the treatment of GAD in primary or secondary care except as a short-term measure during crises. Follow the advice in the 'British national formulary' on the use of a benzodiazepine in this context. |
| 4.1.2 | Benzodiazepines | Lorazepam            | CD 4.1 | Acute panic attacks                                  | By intramuscular injection, or by slow intravenous injection<br>Adult<br>Usual dose 1.5–2.5 mg every 6 hours if required                                                                                       | <a href="https://cks.nice.org.uk/insomnia#!scenario:1">https://cks.nice.org.uk/insomnia#!scenario:1</a>                                                                                                                                                                                        |                | Avoid prolonged use (and abrupt withdrawal thereafter) | <a href="https://www.nice.org.uk/guidance/cg113">https://www.nice.org.uk/guidance/cg113</a><br>Benzodiazepines are associated with a less good outcome in the long term and should not be prescribed for the treatment of individuals with panic disorder<br>Rec 1.4.7 NICE CG 113                                                     |
| 4.1.2 | Benzodiazepines | Lorazepam            | CD 4.1 | Conscious sedation for procedures                    | By mouth<br>Adult<br>2–3 mg, to be taken the night before operation; 2–4 mg, to be taken 1–2 hours before operation.                                                                                           |                                                                                                                                                                                                                                                                                                |                | Avoid prolonged use (and abrupt withdrawal thereafter) |                                                                                                                                                                                                                                                                                                                                        |

|       |                 |           |        |                     |                                                                                                                                                                                                                                                                                                                                                                                                           |  |                                                        |
|-------|-----------------|-----------|--------|---------------------|-----------------------------------------------------------------------------------------------------------------------------------------------------------------------------------------------------------------------------------------------------------------------------------------------------------------------------------------------------------------------------------------------------------|--|--------------------------------------------------------|
| 4.1.2 | Benzodiazepines | Lorazepam | CD 4.1 | Premedication       | <p>By slow intravenous injection<br/>Adult<br/>50 micrograms/kg, to be administered 30–45 minutes before operation.</p> <p>By intramuscular injection<br/>Adult<br/>50 micrograms/kg, to be administered 60–90 minutes before operation.</p> <p>By mouth<br/>Adult<br/>2–3 mg, to be taken the night before operation;<br/>2–4 mg, to be taken 1–2 hours before operation.</p>                            |  | Avoid prolonged use (and abrupt withdrawal thereafter) |
| 4.1.2 | Benzodiazepines | Lorazepam | CD 4.1 | Status epilepticus  | <p>By slow intravenous injection<br/>Adult<br/>50 micrograms/kg, to be administered 30–45 minutes before operation.</p> <p>By intramuscular injection<br/>Adult<br/>50 micrograms/kg, to be administered 60–90 minutes before operation.</p> <p>By slow intravenous injection<br/>Adult<br/>4 mg for 1 dose, then 4 mg after 10 minutes if required for 1 dose, to be administered into a large vein.</p> |  | Avoid prolonged use (and abrupt withdrawal thereafter) |
| 4.1.2 | Benzodiazepines | Lorazepam | CD 4.1 | Febrile convulsions | <p>By slow intravenous injection<br/>Adult<br/>4 mg for 1 dose, then 4 mg after 10 minutes if required for 1 dose, to be</p>                                                                                                                                                                                                                                                                              |  | Avoid prolonged use (and abrupt withdrawal thereafter) |

|       |                 |               |        |                                                                                                               |                                                                                                                                                                                        |                                                                                                                                            |                                                                                      |  |  |                                                                                                                                                                                                                                                                                                                                                                                                               |                                                                |                                                                                                                                                                                                                                                                                                               |                                                                                                                                                                                                                                                                                                       |                                                                                                                                                                                                                                                                                                                                            |  |
|-------|-----------------|---------------|--------|---------------------------------------------------------------------------------------------------------------|----------------------------------------------------------------------------------------------------------------------------------------------------------------------------------------|--------------------------------------------------------------------------------------------------------------------------------------------|--------------------------------------------------------------------------------------|--|--|---------------------------------------------------------------------------------------------------------------------------------------------------------------------------------------------------------------------------------------------------------------------------------------------------------------------------------------------------------------------------------------------------------------|----------------------------------------------------------------|---------------------------------------------------------------------------------------------------------------------------------------------------------------------------------------------------------------------------------------------------------------------------------------------------------------|-------------------------------------------------------------------------------------------------------------------------------------------------------------------------------------------------------------------------------------------------------------------------------------------------------|--------------------------------------------------------------------------------------------------------------------------------------------------------------------------------------------------------------------------------------------------------------------------------------------------------------------------------------------|--|
| 4.1.2 | Benzodiazepines | Lorazepam     | CD 4.1 | Convulsions caused by poisoning                                                                               | administered into a large vein.<br>By slow intravenous injection<br>Adult<br>4 mg for 1 dose, then 4 mg after 10 minutes if required for 1 dose, to be administered into a large vein. |                                                                                                                                            |                                                                                      |  |  |                                                                                                                                                                                                                                                                                                                                                                                                               |                                                                | Avoid prolonged use (and abrupt withdrawal thereafter)                                                                                                                                                                                                                                                        |                                                                                                                                                                                                                                                                                                       |                                                                                                                                                                                                                                                                                                                                            |  |
| 4.1.2 | Benzodiazepines | Oxazepam      | CD 4.1 | Anxiety (short-term use)                                                                                      | Adult<br>15–30 mg 3–4 times a day<br><br>Elderly<br>10–20 mg 3–4 times a day                                                                                                           |                                                                                                                                            |                                                                                      |  |  |                                                                                                                                                                                                                                                                                                                                                                                                               |                                                                | The duration of treatment should be as short as possible depending on the indication, but should not exceed 4 weeks for insomnia and eight to twelve weeks in case of anxiety, including a tapering off process. Extension beyond these periods should not take place without re-evaluation of the situation. | Avoid prolonged use (and abrupt withdrawal thereafter)                                                                                                                                                                                                                                                | Do not offer a benzodiazepine for the treatment of GAD in primary or secondary care except as a short-term measure during crises. Follow the advice in the 'British national formulary' on the use of a benzodiazepine in this context.<br><br><a href="https://www.nice.org.uk/guidance/cg113">https://www.nice.org.uk/guidance/cg113</a> |  |
| 4.1.2 | Benzodiazepines | Oxazepam      | CD 4.1 | Insomnia associated with anxiety                                                                              | Adult<br>15–25 mg once daily (max. per dose 50 mg)                                                                                                                                     |                                                                                                                                            |                                                                                      |  |  | CKS:<br>Use the lowest effective dose for the shortest period possible. The exact duration will depend on the underlying cause but should not continue for longer than 2 weeks. Up to 4 weeks' use may occasionally be required, but continued use should always be re-assessed after 2 weeks.<br><br><a href="https://cks.nice.org.uk/insomnia#!scenario:1">https://cks.nice.org.uk/insomnia#!scenario:1</a> |                                                                | The duration of treatment should be as short as possible depending on the indication, but should not exceed 4 weeks for insomnia and eight to twelve weeks in case of anxiety, including a tapering off process. Extension beyond these periods should not take place without re-evaluation of the situation. | Avoid prolonged use (and abrupt withdrawal thereafter)                                                                                                                                                                                                                                                | Do not offer a benzodiazepine for the treatment of GAD in primary or secondary care except as a short-term measure during crises. Follow the advice in the 'British national formulary' on the use of a benzodiazepine in this context.<br><br><a href="https://www.nice.org.uk/guidance/cg113">https://www.nice.org.uk/guidance/cg113</a> |  |
| 4.3.1 | Antidepressants | Amitriptyline | POM    | Abdominal pain or discomfort (in patients who have not responded to laxatives, loperamide, or antispasmodics) | By mouth<br>Adult<br>Initially 5–10 mg daily, to be taken at night;<br>increased in steps of 10 mg at least every 2 weeks as required; maximum 30 mg per day                           |                                                                                                                                            |                                                                                      |  |  |                                                                                                                                                                                                                                                                                                                                                                                                               | increased in steps of 10 mg at least every 2 weeks as required |                                                                                                                                                                                                                                                                                                               |                                                                                                                                                                                                                                                                                                       |                                                                                                                                                                                                                                                                                                                                            |  |
| 4.3.1 | Antidepressants | Amitriptyline | POM    | Depressive illness (not recommended)                                                                          | By mouth<br>Adult<br>Initially 75 mg daily in divided doses, alternatively initially 75 mg once daily, dose to be taken at bedtime, increased if necessary to 150–                     | Dosage should be initiated at a low level and increased gradually, noting carefully the clinical response and any evidence of intolerance. | Patients should be reviewed every 1–2 weeks at the start of antidepressant treatment |  |  | 1.5.2.6 For people started on antidepressants who are not considered to be at increased risk of suicide, normally see them after 2 weeks. See them regularly thereafter, for example at intervals of 2 to 4 weeks in the first 3 months, and then at longer intervals if response is good.                                                                                                                    |                                                                | The antidepressant effect usually sets in after 2 - 4 weeks. Treatment with antidepressants is symptomatic and must therefore be continued for an appropriate length of time usually up to 6 months after                                                                                                     | Withdrawal effects may occur within 5 days of stopping treatment with antidepressant drugs; they are usually mild and self-limiting, but in some cases may be severe. The risk of withdrawal symptoms is increased if the antidepressant is stopped suddenly after regular administration for 8 weeks | 1.9.1.1 Support and encourage a person who has benefited from taking an antidepressant to continue medication for at least 6 months after remission of an episode of depression.<br><br>1.9.1.2 Review with                                                                                                                                |  |

|       |                 |                                 |     |                         |                                                                                                                                                                                                                                                                          |                                                                                             |                                                                                                                                                                                                                                                                                                                                                                                                                                                                                                                                       |                                                                                                                                                                                                                                                                                        |                                                                                                                                                                                                                                                                                                                                                                                                                                                                                                                                               |                                                                                                                                                                                                                                                                                                                                                                                                                                                                                                                                                          |
|-------|-----------------|---------------------------------|-----|-------------------------|--------------------------------------------------------------------------------------------------------------------------------------------------------------------------------------------------------------------------------------------------------------------------|---------------------------------------------------------------------------------------------|---------------------------------------------------------------------------------------------------------------------------------------------------------------------------------------------------------------------------------------------------------------------------------------------------------------------------------------------------------------------------------------------------------------------------------------------------------------------------------------------------------------------------------------|----------------------------------------------------------------------------------------------------------------------------------------------------------------------------------------------------------------------------------------------------------------------------------------|-----------------------------------------------------------------------------------------------------------------------------------------------------------------------------------------------------------------------------------------------------------------------------------------------------------------------------------------------------------------------------------------------------------------------------------------------------------------------------------------------------------------------------------------------|----------------------------------------------------------------------------------------------------------------------------------------------------------------------------------------------------------------------------------------------------------------------------------------------------------------------------------------------------------------------------------------------------------------------------------------------------------------------------------------------------------------------------------------------------------|
|       |                 |                                 |     |                         | <p>200 mg daily, dose to be increased gradually.</p> <p>Elderly<br/>Initially 30–75 mg daily in divided doses, alternatively initially 30–75 mg once daily, dose to be taken at bedtime, increased if necessary to 150–200 mg daily, dose to be increased gradually.</p> |                                                                                             | <p>1.5.2.7 A person with depression started on antidepressants who is considered to present an increased suicide risk or is younger than 30 years (because of the potential increased prevalence of suicidal thoughts in the early stages of antidepressant treatment for this group) should normally be seen after 1 week and frequently thereafter as appropriate until the risk is no longer considered clinically important.</p> <p><a href="https://www.nice.org.uk/guidance/cg90">https://www.nice.org.uk/guidance/cg90</a></p> | <p>recovery in order to prevent relapse.</p>                                                                                                                                                                                                                                           | <p>or more. The dose should preferably be reduced gradually over about 4 weeks, or longer if withdrawal symptoms emerge (6 months in patients who have been on long-term maintenance treatment). Following remission, antidepressant therapy should be continued at the same dose for at least 6 months (about 12 months in the elderly). Patients with a history of recurrent depression should receive maintenance treatment for at least 2 years.</p> <p>If possible tricyclic and related antidepressants should be withdrawn slowly.</p> | <p>the person with depression the need for continued antidepressant treatment beyond 6 months after remission.</p> <p>1.9.1.4 Advise people with depression to continue antidepressants for at least 2 years if they are at risk of relapse</p> <p>1.9.1.5 When deciding whether to continue maintenance treatment beyond 2 years, re-evaluate with the person with depression, taking into account age, comorbid conditions and other risk factors</p> <p><a href="https://www.nice.org.uk/guidance/cg90">https://www.nice.org.uk/guidance/cg90</a></p> |
| 4.3.1 | Antidepressants | Amitriptyline                   | POM | Neuropathic pain        | <p>By mouth<br/>Adult<br/>Initially 10 mg once daily, increased if necessary to 75 mg once daily, dose to be taken at night, dose to be increased gradually, higher doses to be given on specialist advice.</p>                                                          |                                                                                             | <p>After starting or changing a treatment, carry out an early clinical review of dosage titration, tolerability and adverse effects to assess the suitability of the chosen treatment.</p> <p>Carry out regular clinical reviews to assess and monitor the effectiveness of the treatment</p> <p><a href="https://www.nice.org.uk/guidance/cg173/chapter/1-Recommendations">https://www.nice.org.uk/guidance/cg173/chapter/1-Recommendations</a></p>                                                                                  | <p>Treatment is symptomatic and should therefore be continued for an appropriate length of time. In many patients, therapy may be needed for several years. Regular reassessment is recommended to confirm that continuation of the treatment remains appropriate for the patient.</p> |                                                                                                                                                                                                                                                                                                                                                                                                                                                                                                                                               |                                                                                                                                                                                                                                                                                                                                                                                                                                                                                                                                                          |
| 4.3.1 | Antidepressants | Amitriptyline                   | POM | Migraine prophylaxis    | <p>By mouth<br/>Adult<br/>Initially 10 mg once daily, then increased if necessary to 50–75 mg once daily (max. per dose 150 mg), dose to be taken at night.</p>                                                                                                          |                                                                                             | <p>1.3.22: Review the need for continuing migraine prophylaxis 6 months after the start of prophylactic treatment</p> <p>NICE CG150<br/><a href="https://www.nice.org.uk/guidance/cg150/chapter/Recommendations#management-2">https://www.nice.org.uk/guidance/cg150/chapter/Recommendations#management-2</a></p>                                                                                                                                                                                                                     | <p>Treatment must be continued for an appropriate length of time. Regular reassessment is recommended to confirm that continuation of the treatment remains appropriate for the patient</p>                                                                                            |                                                                                                                                                                                                                                                                                                                                                                                                                                                                                                                                               |                                                                                                                                                                                                                                                                                                                                                                                                                                                                                                                                                          |
| 4.3.1 | Antidepressants | Amitriptyline with Perphenazine | POM | Depression with anxiety | <p>By mouth<br/>Adult<br/>1 tablet 3 times a day, an additional tablet may be taken at bedtime when required.</p>                                                                                                                                                        | <p>Patients should be reviewed every 1–2 weeks at the start of antidepressant treatment</p> | <p>1.5.2.6 For people started on antidepressants who are not considered to be at increased risk of suicide, normally see them after 2 weeks. See them regularly thereafter, for example at intervals of 2 to 4 weeks in the first 3 months, and then at longer intervals if response is good.</p>                                                                                                                                                                                                                                     | <p>Following remission, antidepressant treatment should be continued at the same dose for at least 6 months (about 12 months in the elderly). Patients with a history of recurrent depression should receive maintenance treatment for at least 2 years.</p>                           | <p>1.9.1.1 Support and encourage a person who has benefited from taking an antidepressant to continue medication for at least 6 months after remission of an episode of depression.</p> <p>1.9.1.2 Review with</p>                                                                                                                                                                                                                                                                                                                            |                                                                                                                                                                                                                                                                                                                                                                                                                                                                                                                                                          |

|       |                 |                  |     |                       |                                                                                                                                                                                                                                                                                                                     |
|-------|-----------------|------------------|-----|-----------------------|---------------------------------------------------------------------------------------------------------------------------------------------------------------------------------------------------------------------------------------------------------------------------------------------------------------------|
| 4.3.1 | Antidepressants | <i>Amoxapine</i> |     | NOT LISTED<br>IN BNF  |                                                                                                                                                                                                                                                                                                                     |
| 4.3.1 | Antidepressants | Clomipramine     | POM | Depressive<br>illness | <p>Adult<br/>Initially 10 mg<br/>daily, then<br/>increased if<br/>necessary to 30–<br/>150 mg daily in<br/>divided doses,<br/>alternatively<br/>increased to 30–<br/>150 mg once<br/>daily; maximum<br/>250 mg per day.</p> <p>Elderly<br/>Initially 10 mg<br/>daily, then<br/>increased to 30–<br/>75 mg daily</p> |

Patients should be reviewed every 1–2 weeks at the start of antidepressant treatment

1.5.2.7 A person with depression started on antidepressants who is considered to present an increased suicide risk or is younger than 30 years (because of the potential increased prevalence of suicidal thoughts in the early stages of antidepressant treatment for this group) should normally be seen after 1 week and frequently thereafter as appropriate until the risk is no longer considered clinically important.

<https://www.nice.org.uk/guidance/cg90>

1.5.2.6 For people started on antidepressants who are not considered to be at increased risk of suicide, normally see them after 2 weeks. See them regularly thereafter, for example at intervals of 2 to 4 weeks in the first 3 months, and then at longer intervals if response is good.

1.5.2.7 A person with depression started on antidepressants who is considered to present an increased suicide risk or is younger than 30 years (because of the potential increased prevalence of suicidal thoughts in the early stages of antidepressant treatment for this group) should normally be seen after 1 week and frequently thereafter as appropriate until the risk is no longer considered clinically important.

<https://www.nice.org.uk/guidance/cg90>

Withdrawal effects may occur within 5 days of stopping treatment with antidepressant drugs; they are usually mild and self-limiting, but in some cases may be severe. The risk of withdrawal symptoms is increased if the antidepressant is stopped suddenly after regular administration for 8 weeks or more. The dose should preferably be reduced gradually over about 4 weeks, or longer if withdrawal symptoms emerge (6 months in patients who have been on long-term maintenance treatment). Following remission, antidepressant therapy should be continued at the same dose for at least 6 months (about 12 months in the elderly). Patients with a history of recurrent depression should receive maintenance treatment for at least 2 years.

If possible tricyclic and related antidepressants should be withdrawn slowly.

the person with depression the need for continued antidepressant treatment beyond 6 months after remission.

1.9.1.4 Advise people with depression to continue antidepressants for at least 2 years if they are at risk of relapse

1.9.1.5 When deciding whether to continue maintenance treatment beyond 2 years, re-evaluate with the person with depression, taking into account age, comorbid conditions and other risk factors

<https://www.nice.org.uk/guidance/cg90>

1.9.1.1 Support and encourage a person who has benefited from taking an antidepressant to continue medication for at least 6 months after remission of an episode of depression.

1.9.1.2 Review with the person with depression the need for continued antidepressant treatment beyond 6 months after remission.

1.9.1.4 Advise people with depression to continue antidepressants for at least 2 years if they are at risk of relapse

1.9.1.5 When deciding whether to continue maintenance treatment beyond 2 years, re-evaluate with the person with depression, taking into account age, comorbid conditions

|       |                 |              |     |                                                                                                            |                                                                                                                                                                                                           |
|-------|-----------------|--------------|-----|------------------------------------------------------------------------------------------------------------|-----------------------------------------------------------------------------------------------------------------------------------------------------------------------------------------------------------|
| 4.3.1 | Antidepressants | Clomipramine | POM | Phobic and obsessional states                                                                              | <p>Adult<br/>Initially 25 mg daily, then increased to 100–150 mg daily; maximum 250 mg per day.</p> <p>Elderly<br/>Initially 10 mg daily, then increased to 100–150 mg daily; maximum 250 mg per day.</p> |
| 4.3.1 | Antidepressants | Clomipramine | POM | Adjunctive treatment of cataplexy associated with narcolepsy                                               | <p>Adult<br/>Initially 10 mg daily; increased if necessary to 10–75 mg daily</p>                                                                                                                          |
| 4.3.1 | Antidepressants | Dosulepin    | POM | Depressive illness, particularly where sedation is required (not recommended—increased risk of fatality in | <p>Adult<br/>Initially 75 mg daily, increased if necessary to 150 mg daily; up to 225 mg daily in some circumstances (e.g. hospital use).</p> <p>Elderly<br/>Initially 50–75 mg</p>                       |

Patients should be reviewed every 1–2 weeks at the start of antidepressant treatment

Dosulepin should not be prescribed.  
  
1.8.1.1.3 Do not switch to, or start, dosulepin because evidence supporting its tolerability relative to other antidepressants is outweighed by the increased cardiac risk and toxicity in overdose

After a response has been obtained, maintenance therapy should be continued at the optimum dose to avoid relapse. Patients with a history of recurrence require maintenance treatment for a longer duration. Duration of maintenance treatment and need for further treatment should be reviewed periodically.

Withdrawal effects may occur within 5 days of stopping treatment with antidepressant drugs; they are usually mild and self-limiting, but in some cases may be severe. The risk of withdrawal symptoms is increased if the antidepressant is stopped suddenly after regular administration for 8 weeks or more. The dose should preferably be reduced gradually over about 4 weeks, or longer if withdrawal symptoms emerge (6 months in patients who have been on long-term maintenance treatment).

If possible tricyclic and related antidepressants should be withdrawn slowly. Withdrawal effects may occur within 5 days of stopping treatment with antidepressant drugs; they are usually mild and self-limiting, but in some cases may be severe. The risk of withdrawal symptoms is increased if the antidepressant is stopped suddenly after regular administration for 8 weeks or more. The dose should preferably be reduced gradually over about 4 weeks, or longer if withdrawal symptoms emerge (6 months in patients who have been on long-term maintenance treatment).

If possible tricyclic and related antidepressants should be withdrawn slowly. Withdrawal effects may occur within 5 days of stopping treatment with antidepressant drugs; they are usually mild and self-limiting, but in some cases may be severe. The risk of withdrawal symptoms is increased if the antidepressant is stopped suddenly after regular administration for 8 weeks

- 1.9.1.1 Support and encourage a person who has benefited from taking an antidepressant to continue medication for at least 6 months after remission of an episode of depression.
- 1.9.1.2 Review with



overdose) (initiated by a specialist) daily, increased if necessary to 75–150 mg daily; up to 225 mg daily in some circumstances (e.g. hospital use).

1.5.2.6 For people started on antidepressants who are not considered to be at increased risk of suicide, normally see them after 2 weeks. See them regularly thereafter, for example at intervals of 2 to 4 weeks in the first 3 months, and then at longer intervals if response is good.

1.5.2.7 A person with depression started on antidepressants who is considered to present an increased suicide risk or is younger than 30 years (because of the potential increased prevalence of suicidal thoughts in the early stages of antidepressant treatment for this group) should normally be seen after 1 week and frequently thereafter as appropriate until the risk is no longer considered clinically important.

<https://www.nice.org.uk/guidance/cg90>

or more. The dose should preferably be reduced gradually over about 4 weeks, or longer if withdrawal symptoms emerge (6 months in patients who have been on long-term maintenance treatment). Following remission, antidepressant therapy should be continued at the same dose for at least 6 months (about 12 months in the elderly). Patients with a history of recurrent depression should receive maintenance treatment for at least 2 years.

If possible tricyclic and related antidepressants should be withdrawn slowly.

the person with depression the need for continued antidepressant treatment beyond 6 months after remission.

1.9.1.4 Advise people with depression to continue antidepressants for at least 2 years if they are at risk of relapse

1.9.1.5 When deciding whether to continue maintenance treatment beyond 2 years, re-evaluate with the person with depression, taking into account age, comorbid conditions and other risk factors

<https://www.nice.org.uk/guidance/cg90>

4.3.1 Antidepressants Doxepin POM Depressive illness (particularly where sedation is required) Adult Initially 75 mg daily; maintenance 25–300 mg daily, doses above 100 mg given in 3 divided doses. Elderly Start with lower doses and adjust according to response.

Patients should be reviewed every 1–2 weeks at the start of antidepressant treatment

1.5.2.6 For people started on antidepressants who are not considered to be at increased risk of suicide, normally see them after 2 weeks. See them regularly thereafter, for example at intervals of 2 to 4 weeks in the first 3 months, and then at longer intervals if response is good.

1.5.2.7 A person with depression started on antidepressants who is considered to present an increased suicide risk or is younger than 30 years (because of the potential increased prevalence of suicidal thoughts in the early stages of antidepressant treatment for this group) should normally be seen after 1 week and frequently thereafter as appropriate until the risk is no longer considered clinically important.

<https://www.nice.org.uk/guidance/cg90>

Withdrawal effects may occur within 5 days of stopping treatment with antidepressant drugs; they are usually mild and self-limiting, but in some cases may be severe. The risk of withdrawal symptoms is increased if the antidepressant is stopped suddenly after regular administration for 8 weeks or more. The dose should preferably be reduced gradually over about 4 weeks, or longer if withdrawal symptoms emerge (6 months in patients who have been on long-term maintenance treatment). Following remission, antidepressant therapy should be continued at the same dose for at least 6 months (about 12 months in the elderly). Patients with a history of recurrent depression should receive maintenance treatment for at least 2 years.

If possible tricyclic and related antidepressants should be withdrawn slowly.

1.9.1.1 Support and encourage a person who has benefited from taking an antidepressant to continue medication for at least 6 months after remission of an episode of depression.

1.9.1.2 Review with the person with depression the need for continued antidepressant treatment beyond 6 months after remission.

1.9.1.4 Advise people with depression to continue antidepressants for at least 2 years if they are at risk of relapse

1.9.1.5 When deciding whether to continue maintenance treatment beyond 2 years, re-evaluate with the person with depression, taking into account age,

|       |                 |            |     |                                         |                                                                                                                                                    |                                                                                                                                                                   |                                                                                             |                                                                                                                                                                                                                                                                                                                                                                                                                                                                                                                                                                                                                                                                                                                                                                                                                                         |                                                                                                                                                                                                                                                                                                                                                                                                                                                                                                                                                                                                                                                                                                                                                                                                                                                     |                                                                                                                                                                                                                                                                                                                                                                                                                                                                                                                                                                                                                                                                                                                                                                                                                                                                                                                         |
|-------|-----------------|------------|-----|-----------------------------------------|----------------------------------------------------------------------------------------------------------------------------------------------------|-------------------------------------------------------------------------------------------------------------------------------------------------------------------|---------------------------------------------------------------------------------------------|-----------------------------------------------------------------------------------------------------------------------------------------------------------------------------------------------------------------------------------------------------------------------------------------------------------------------------------------------------------------------------------------------------------------------------------------------------------------------------------------------------------------------------------------------------------------------------------------------------------------------------------------------------------------------------------------------------------------------------------------------------------------------------------------------------------------------------------------|-----------------------------------------------------------------------------------------------------------------------------------------------------------------------------------------------------------------------------------------------------------------------------------------------------------------------------------------------------------------------------------------------------------------------------------------------------------------------------------------------------------------------------------------------------------------------------------------------------------------------------------------------------------------------------------------------------------------------------------------------------------------------------------------------------------------------------------------------------|-------------------------------------------------------------------------------------------------------------------------------------------------------------------------------------------------------------------------------------------------------------------------------------------------------------------------------------------------------------------------------------------------------------------------------------------------------------------------------------------------------------------------------------------------------------------------------------------------------------------------------------------------------------------------------------------------------------------------------------------------------------------------------------------------------------------------------------------------------------------------------------------------------------------------|
| 4.3.1 | Antidepressants | Imipramine | POM | Depressive illness                      | <p>Adult<br/>Initially up to 75 mg daily, increased to 150–200 mg daily.</p> <p>Elderly<br/>Initially 10 mg daily, increased to 30–50 mg daily</p> | <p>Improvement in depression may not occur during the first two to four weeks of treatment and hence patients should be closely monitored during this period.</p> | <p>Patients should be reviewed every 1–2 weeks at the start of antidepressant treatment</p> | <p>1.5.2.6 For people started on antidepressants who are not considered to be at increased risk of suicide, normally see them after 2 weeks. See them regularly thereafter, for example at intervals of 2 to 4 weeks in the first 3 months, and then at longer intervals if response is good.</p> <p>1.5.2.7 A person with depression started on antidepressants who is considered to present an increased suicide risk or is younger than 30 years (because of the potential increased prevalence of suicidal thoughts in the early stages of antidepressant treatment for this group) should normally be seen after 1 week and frequently thereafter as appropriate until the risk is no longer considered clinically important.</p> <p><a href="https://www.nice.org.uk/guidance/cg90">https://www.nice.org.uk/guidance/cg90</a></p> | <p>Withdrawal effects may occur within 5 days of stopping treatment with antidepressant drugs; they are usually mild and self-limiting, but in some cases may be severe. The risk of withdrawal symptoms is increased if the antidepressant is stopped suddenly after regular administration for 8 weeks or more. The dose should preferably be reduced gradually over about 4 weeks, or longer if withdrawal symptoms emerge (6 months in patients who have been on long-term maintenance treatment). Following remission, antidepressant therapy should be continued at the same dose for at least 6 months (about 12 months in the elderly). Patients with a history of recurrent depression should receive maintenance treatment for at least 2 years.</p> <p>If possible tricyclic and related antidepressants should be withdrawn slowly.</p> | <p>comorbid conditions and other risk factors</p> <p><a href="https://www.nice.org.uk/guidance/cg90">https://www.nice.org.uk/guidance/cg90</a></p> <p>1.9.1.1 Support and encourage a person who has benefited from taking an antidepressant to continue medication for at least 6 months after remission of an episode of depression.</p> <p>1.9.1.2 Review with the person with depression the need for continued antidepressant treatment beyond 6 months after remission.</p> <p>1.9.1.4 Advise people with depression to continue antidepressants for at least 2 years if they are at risk of relapse</p> <p>1.9.1.5 When deciding whether to continue maintenance treatment beyond 2 years, re-evaluate with the person with depression, taking into account age, comorbid conditions and other risk factors</p> <p><a href="https://www.nice.org.uk/guidance/cg90">https://www.nice.org.uk/guidance/cg90</a></p> |
| 4.3.1 | Antidepressants | Imipramine | POM | Depressive illness in hospital patients | <p>Adult<br/>Initially up to 75 mg daily, increased to up to 300 mg daily</p>                                                                      | <p>Improvement in depression may not occur during the first two to four weeks of treatment and hence patients should be closely monitored during this period.</p> | <p>Patients should be reviewed every 1–2 weeks at the start of antidepressant treatment</p> | <p>1.5.2.6 For people started on antidepressants who are not considered to be at increased risk of suicide, normally see them after 2 weeks. See them regularly thereafter, for example at intervals of 2 to 4 weeks in the first 3 months, and then at longer intervals if response is good.</p> <p>1.5.2.7 A person with depression started on antidepressants who is considered to present an increased suicide risk or is younger than 30 years (because of the potential increased prevalence of suicidal thoughts in the</p>                                                                                                                                                                                                                                                                                                      | <p>Withdrawal effects may occur within 5 days of stopping treatment with antidepressant drugs; they are usually mild and self-limiting, but in some cases may be severe. The risk of withdrawal symptoms is increased if the antidepressant is stopped suddenly after regular administration for 8 weeks or more. The dose should preferably be reduced gradually over about 4 weeks, or longer if withdrawal symptoms emerge (6 months in patients who have been on long-term maintenance treatment). Following</p>                                                                                                                                                                                                                                                                                                                                | <p>1.9.1.1 Support and encourage a person who has benefited from taking an antidepressant to continue medication for at least 6 months after remission of an episode of depression.</p> <p>1.9.1.2 Review with the person with depression the need for continued antidepressant treatment beyond 6 months after remission.</p> <p>1.9.1.4 Advise people</p>                                                                                                                                                                                                                                                                                                                                                                                                                                                                                                                                                             |

|       |                 |               |     |                    |                                                                                                   |                                                                                                                                                                                                                                |                                                                                                                                                                                                                                                                                                             |                                                                                                                                                                                                                                                                                                                                                                                                                                                                                                                                                                                                                                                                                                                                                                                                                                         |                                                                                                                                                               |                                                                                                                                                                                                                                                                                                                                                                                                                                                                                                                                                                                                                                                                                                                                                                                                                                                                                                                                                                                                                                                                                                                                                                                           |                                                                                                                                                                                                                                                                                                                                                                                                                                                                                                                                                                                                                                                                                                                                                                                                                                                                                                                                                                                                                                                                                                                                                                                                                                                                                                           |
|-------|-----------------|---------------|-----|--------------------|---------------------------------------------------------------------------------------------------|--------------------------------------------------------------------------------------------------------------------------------------------------------------------------------------------------------------------------------|-------------------------------------------------------------------------------------------------------------------------------------------------------------------------------------------------------------------------------------------------------------------------------------------------------------|-----------------------------------------------------------------------------------------------------------------------------------------------------------------------------------------------------------------------------------------------------------------------------------------------------------------------------------------------------------------------------------------------------------------------------------------------------------------------------------------------------------------------------------------------------------------------------------------------------------------------------------------------------------------------------------------------------------------------------------------------------------------------------------------------------------------------------------------|---------------------------------------------------------------------------------------------------------------------------------------------------------------|-------------------------------------------------------------------------------------------------------------------------------------------------------------------------------------------------------------------------------------------------------------------------------------------------------------------------------------------------------------------------------------------------------------------------------------------------------------------------------------------------------------------------------------------------------------------------------------------------------------------------------------------------------------------------------------------------------------------------------------------------------------------------------------------------------------------------------------------------------------------------------------------------------------------------------------------------------------------------------------------------------------------------------------------------------------------------------------------------------------------------------------------------------------------------------------------|-----------------------------------------------------------------------------------------------------------------------------------------------------------------------------------------------------------------------------------------------------------------------------------------------------------------------------------------------------------------------------------------------------------------------------------------------------------------------------------------------------------------------------------------------------------------------------------------------------------------------------------------------------------------------------------------------------------------------------------------------------------------------------------------------------------------------------------------------------------------------------------------------------------------------------------------------------------------------------------------------------------------------------------------------------------------------------------------------------------------------------------------------------------------------------------------------------------------------------------------------------------------------------------------------------------|
| 4.3.1 | Antidepressants | Lofepamine    | POM | Depressive illness | <p>Adult<br/>140–210 mg daily in divided doses.</p> <p>Elderly<br/>May respond to lower doses</p> | <p>Elderly patients are particularly susceptible to many of the side-effects of tricyclic antidepressants; low initial doses should be used, with close monitoring, particularly for psychiatric and cardiac side-effects.</p> | <p>early stages of antidepressant treatment for this group) should normally be seen after 1 week and frequently thereafter as appropriate until the risk is no longer considered clinically important.</p> <p><a href="https://www.nice.org.uk/guidance/cg90">https://www.nice.org.uk/guidance/cg90</a></p> | <p>1.5.2.6 For people started on antidepressants who are not considered to be at increased risk of suicide, normally see them after 2 weeks. See them regularly thereafter, for example at intervals of 2 to 4 weeks in the first 3 months, and then at longer intervals if response is good.</p> <p>1.5.2.7 A person with depression started on antidepressants who is considered to present an increased suicide risk or is younger than 30 years (because of the potential increased prevalence of suicidal thoughts in the early stages of antidepressant treatment for this group) should normally be seen after 1 week and frequently thereafter as appropriate until the risk is no longer considered clinically important.</p> <p><a href="https://www.nice.org.uk/guidance/cg90">https://www.nice.org.uk/guidance/cg90</a></p> | <p>The antidepressive effect usually sets in after 2–4 weeks. Treatment with antidepressants is symptomatic and</p>                                           | <p>remission, antidepressant therapy should be continued at the same dose for at least 6 months (about 12 months in the elderly). Patients with a history of recurrent depression should receive maintenance treatment for at least 2 years.</p> <p>If possible tricyclic and related antidepressants should be withdrawn slowly.</p> <p>Withdrawal effects may occur within 5 days of stopping treatment with antidepressant drugs; they are usually mild and self-limiting, but in some cases may be severe. The risk of withdrawal symptoms is increased if the antidepressant is stopped suddenly after regular administration for 8 weeks or more. The dose should preferably be reduced gradually over about 4 weeks, or longer if withdrawal symptoms emerge (6 months in patients who have been on long-term maintenance treatment). Following remission, antidepressant therapy should be continued at the same dose for at least 6 months (about 12 months in the elderly). Patients with a history of recurrent depression should receive maintenance treatment for at least 2 years.</p> <p>If possible tricyclic and related antidepressants should be withdrawn slowly.</p> | <p>with depression to continue antidepressants for at least 2 years if they are at risk of relapse</p> <p>1.9.1.5 When deciding whether to continue maintenance treatment beyond 2 years, re-evaluate with the person with depression, taking into account age, comorbid conditions and other risk factors</p> <p><a href="https://www.nice.org.uk/guidance/cg90">https://www.nice.org.uk/guidance/cg90</a></p> <p>1.9.1.1 Support and encourage a person who has benefited from taking an antidepressant to continue medication for at least 6 months after remission of an episode of depression.</p> <p>1.9.1.2 Review with the person with depression the need for continued antidepressant treatment beyond 6 months after remission.</p> <p>1.9.1.4 Advise people with depression to continue antidepressants for at least 2 years if they are at risk of relapse</p> <p>1.9.1.5 When deciding whether to continue maintenance treatment beyond 2 years, re-evaluate with the person with depression, taking into account age, comorbid conditions and other risk factors</p> <p><a href="https://www.nice.org.uk/guidance/cg90">https://www.nice.org.uk/guidance/cg90</a></p> <p>1.9.1.1 Support and encourage a person who has benefited from taking an antidepressant to continue medication</p> |
| 4.3.1 | Antidepressants | Nortriptyline | POM | Depressive illness | <p>Adult<br/>To be initiated at a low dose, then increased if necessary to 75–100 mg daily;</p>   | <p>Patients should be reviewed every 1–2 weeks at the start of antidepressant treatment</p>                                                                                                                                    | <p>1.5.2.6 For people started on antidepressants who are not considered to be at increased risk of suicide, normally see them after 2 weeks. See them regularly</p>                                                                                                                                         | <p>The antidepressive effect usually sets in after 2–4 weeks. Treatment with antidepressants is symptomatic and</p>                                                                                                                                                                                                                                                                                                                                                                                                                                                                                                                                                                                                                                                                                                                     | <p>Withdrawal effects may occur within 5 days of stopping treatment with antidepressant drugs; they are usually mild and self-limiting, but in some cases</p> | <p>1.9.1.1 Support and encourage a person who has benefited from taking an antidepressant to continue medication</p>                                                                                                                                                                                                                                                                                                                                                                                                                                                                                                                                                                                                                                                                                                                                                                                                                                                                                                                                                                                                                                                                      |                                                                                                                                                                                                                                                                                                                                                                                                                                                                                                                                                                                                                                                                                                                                                                                                                                                                                                                                                                                                                                                                                                                                                                                                                                                                                                           |

maximum 150 mg per day.

Elderly  
To be initiated at a low dose, then increased if necessary to 30–50 mg daily

thereafter, for example at intervals of 2 to 4 weeks in the first 3 months, and then at longer intervals if response is good.

1.5.2.7 A person with depression started on antidepressants who is considered to present an increased suicide risk or is younger than 30 years (because of the potential increased prevalence of suicidal thoughts in the early stages of antidepressant treatment for this group) should normally be seen after 1 week and frequently thereafter as appropriate until the risk is no longer considered clinically important.

<https://www.nice.org.uk/guidance/cg90>

should therefore be continued for a sufficient period of time, usually 6 months or longer to prevent recurrence.

may be severe. The risk of withdrawal symptoms is increased if the antidepressant is stopped suddenly after regular administration for 8 weeks or more. The dose should preferably be reduced gradually over about 4 weeks, or longer if withdrawal symptoms emerge (6 months in patients who have been on long-term maintenance treatment). Following remission, antidepressant therapy should be continued at the same dose for at least 6 months (about 12 months in the elderly). Patients with a history of recurrent depression should receive maintenance treatment for at least 2 years.

If possible tricyclic and related antidepressants should be withdrawn slowly.

for at least 6 months after remission of an episode of depression.

1.9.1.2 Review with the person with depression the need for continued antidepressant treatment beyond 6 months after remission.

1.9.1.4 Advise people with depression to continue antidepressants for at least 2 years if they are at risk of relapse

1.9.1.5 When deciding whether to continue maintenance treatment beyond 2 years, re-evaluate with the person with depression, taking into account age, comorbid conditions and other risk factors

<https://www.nice.org.uk/guidance/cg90>

4.3.1 Antidepressants Nortriptyline POM Neuropathic pain Adult Initially 10 mg once daily, increased if necessary to 75 mg daily; higher doses to be given under specialist supervision.

4.3.1 Antidepressants Trimipramine POM Depressive illness (particularly where sedation required) Adult Initially 50–75 mg daily, increased if necessary to 150–300 mg daily. Elderly

Patients should be reviewed every 1–2 weeks at the start of antidepressant treatment

1.5.2.6 For people started on antidepressants who are not considered to be at increased risk of suicide, normally see them after 2 weeks. See them regularly thereafter, for example at

Withdrawal effects may occur within 5 days of stopping treatment with antidepressant drugs; they are usually mild and self-limiting, but in some cases may be severe. The risk of withdrawal symptoms is increased if the antidepressant is stopped suddenly after regular administration for 8 weeks or more. The dose should preferably be reduced gradually over about 4 weeks, or longer if withdrawal symptoms emerge (6 months in patients who have been on long-term maintenance treatment).

If possible tricyclic and related antidepressants should be withdrawn slowly. Withdrawal effects may occur within 5 days of stopping treatment with antidepressant drugs; they are usually mild and self-limiting, but in some cases may be severe. The risk of

1.9.1.1 Support and encourage a person who has benefited from taking an antidepressant to continue medication for at least 6 months

Initially 10–25 mg  
3 times a day,  
maintenance 75–  
150 mg daily

intervals of 2 to 4 weeks in  
the first 3 months, and then  
at longer intervals if  
response is good.

1.5.2.7 A person with  
depression started on  
antidepressants who is  
considered to present an  
increased suicide risk or is  
younger than 30 years  
(because of the potential  
increased prevalence of  
suicidal thoughts in the  
early stages of  
antidepressant treatment  
for this group) should  
normally be seen after 1  
week and frequently  
thereafter as appropriate  
until the risk is no longer  
considered clinically  
important.

<https://www.nice.org.uk/guidance/cg90>

withdrawal symptoms is  
increased if the  
antidepressant is stopped  
suddenly after regular  
administration for 8 weeks  
or more. The dose should  
preferably be reduced  
gradually over about 4  
weeks, or longer if  
withdrawal symptoms  
emerge (6 months in  
patients who have been on  
long-term maintenance  
treatment). Following  
remission, antidepressant  
therapy should be  
continued at the same dose  
for at least 6 months (about  
12 months in the elderly).  
Patients with a history of  
recurrent depression  
should receive  
maintenance treatment for  
at least 2 years.

If possible tricyclic and  
related antidepressants  
should be withdrawn  
slowly.

after remission of an  
episode of  
depression.

1.9.1.2 Review with  
the person with  
depression the need  
for continued  
antidepressant  
treatment beyond 6  
months after  
remission.

1.9.1.4 Advise people  
with depression to  
continue  
antidepressants for at  
least 2 years if they  
are at risk of relapse

1.9.1.5 When  
deciding whether to  
continue  
maintenance  
treatment beyond 2  
years, re-evaluate  
with the person with  
depression, taking  
into account age,  
comorbid conditions  
and other risk factors

<https://www.nice.org.uk/guidance/cg90>

4.3.1 Antidepressants Mianserin POM Depressive illness (particularly where sedation is required) Adult Initially 30–40 mg daily in divided doses; usual dose 30–90 mg. Elderly Initially 30 mg daily; usual dose 30–90 mg.

Patients should be  
reviewed every 1–2 weeks  
at the start of  
antidepressant treatment

1.5.2.6 For people started  
on antidepressants who are  
not considered to be at  
increased risk of suicide,  
normally see them after 2  
weeks. See them regularly  
thereafter, for example at  
intervals of 2 to 4 weeks in  
the first 3 months, and then  
at longer intervals if  
response is good.

1.5.2.7 A person with  
depression started on  
antidepressants who is  
considered to present an  
increased suicide risk or is  
younger than 30 years  
(because of the potential  
increased prevalence of  
suicidal thoughts in the  
early stages of  
antidepressant treatment  
for this group) should  
normally be seen after 1  
week and frequently  
thereafter as appropriate  
until the risk is no longer  
considered clinically  
important.

<https://www.nice.org.uk/guidance/cg90>

It is often  
advantageous to  
maintain  
antidepressant  
treatment for several  
months after clinical  
improvement has  
occurred. In order to  
ensure an optimal  
antidepressant effect  
the dosage of  
mianserin should not  
be reduced.

<https://www.medicines.org.uk/emc/products/8476/smpc>

Withdrawal effects may  
occur within 5 days of  
stopping treatment with  
antidepressant drugs; they  
are usually mild and self-  
limiting, but in some cases  
may be severe. The risk of  
withdrawal symptoms is  
increased if the  
antidepressant is stopped  
suddenly after regular  
administration for 8 weeks  
or more. The dose should  
preferably be reduced  
gradually over about 4  
weeks, or longer if  
withdrawal symptoms  
emerge (6 months in  
patients who have been on  
long-term maintenance  
treatment). Following  
remission, antidepressant  
therapy should be  
continued at the same dose  
for at least 6 months (about  
12 months in the elderly).  
Patients with a history of  
recurrent depression  
should receive  
maintenance treatment for  
at least 2 years.

If possible tricyclic and  
related antidepressants

1.9.1.1 Support and  
encourage a person  
who has benefited  
from taking an  
antidepressant to  
continue medication  
for at least 6 months  
after remission of an  
episode of  
depression.

1.9.1.2 Review with  
the person with  
depression the need  
for continued  
antidepressant  
treatment beyond 6  
months after  
remission.

1.9.1.4 Advise people  
with depression to  
continue  
antidepressants for at  
least 2 years if they  
are at risk of relapse

1.9.1.5 When  
deciding whether to  
continue  
maintenance  
treatment beyond 2  
years, re-evaluate  
with the person with

|       |                 |           |     |                                                              |                                                                                                                                                                                                                                                                                                                                                                                     |                                                                                      |                                                                                                                                                                                                                                                                                                                                                                                                                                                                                                                                                                                                                                                                                                                                                                                                                                         |                                                                                                                                                                                                                                                                                                                                                                                                                                                                          |                                                                                                                                                                                                                                                                                                                                                                                                                                                                                                                                                                                                                                                                                                                                                                      |
|-------|-----------------|-----------|-----|--------------------------------------------------------------|-------------------------------------------------------------------------------------------------------------------------------------------------------------------------------------------------------------------------------------------------------------------------------------------------------------------------------------------------------------------------------------|--------------------------------------------------------------------------------------|-----------------------------------------------------------------------------------------------------------------------------------------------------------------------------------------------------------------------------------------------------------------------------------------------------------------------------------------------------------------------------------------------------------------------------------------------------------------------------------------------------------------------------------------------------------------------------------------------------------------------------------------------------------------------------------------------------------------------------------------------------------------------------------------------------------------------------------------|--------------------------------------------------------------------------------------------------------------------------------------------------------------------------------------------------------------------------------------------------------------------------------------------------------------------------------------------------------------------------------------------------------------------------------------------------------------------------|----------------------------------------------------------------------------------------------------------------------------------------------------------------------------------------------------------------------------------------------------------------------------------------------------------------------------------------------------------------------------------------------------------------------------------------------------------------------------------------------------------------------------------------------------------------------------------------------------------------------------------------------------------------------------------------------------------------------------------------------------------------------|
| 4.3.1 | Antidepressants | Trazodone | POM | Depressive illness (particularly where sedation is required) | <p>Adult<br/>Initially 150 mg daily, increased if necessary to 300 mg daily; increased if necessary to 600 mg daily in divided doses, higher dose for use in hospital patients only.</p> <p>Elderly<br/>Initially 100 mg daily, increased if necessary to 300 mg daily; increased if necessary to 600 mg daily in divided doses, higher dose for use in hospital patients only.</p> | Patients should be reviewed every 1–2 weeks at the start of antidepressant treatment | <p>1.5.2.6 For people started on antidepressants who are not considered to be at increased risk of suicide, normally see them after 2 weeks. See them regularly thereafter, for example at intervals of 2 to 4 weeks in the first 3 months, and then at longer intervals if response is good.</p> <p>1.5.2.7 A person with depression started on antidepressants who is considered to present an increased suicide risk or is younger than 30 years (because of the potential increased prevalence of suicidal thoughts in the early stages of antidepressant treatment for this group) should normally be seen after 1 week and frequently thereafter as appropriate until the risk is no longer considered clinically important.</p> <p><a href="https://www.nice.org.uk/guidance/cg90">https://www.nice.org.uk/guidance/cg90</a></p> | should be withdrawn slowly.                                                                                                                                                                                                                                                                                                                                                                                                                                              | depression, taking into account age, comorbid conditions and other risk factors                                                                                                                                                                                                                                                                                                                                                                                                                                                                                                                                                                                                                                                                                      |
| 4.3.1 | Antidepressants | Trazodone | POM | Anxiety                                                      | <p>Adult<br/>75mg daily, increased if necessary to 300mg daily</p>                                                                                                                                                                                                                                                                                                                  |                                                                                      |                                                                                                                                                                                                                                                                                                                                                                                                                                                                                                                                                                                                                                                                                                                                                                                                                                         | <p>Withdrawal effects may occur within 5 days of stopping treatment with antidepressant drugs; they are usually mild and self-limiting, but in some cases may be severe. The risk of withdrawal symptoms is increased if the antidepressant is stopped suddenly after regular administration for 8 weeks or more. The dose should preferably be reduced gradually over about 4 weeks, or longer if withdrawal symptoms emerge (6 months in patients who have been on</p> | <p>1.9.1.1 Support and encourage a person who has benefited from taking an antidepressant to continue medication for at least 6 months after remission of an episode of depression.</p> <p>1.9.1.2 Review with the person with depression the need for continued antidepressant treatment beyond 6 months after remission.</p> <p>1.9.1.4 Advise people with depression to continue antidepressants for at least 2 years if they are at risk of relapse</p> <p>1.9.1.5 When deciding whether to continue maintenance treatment beyond 2 years, re-evaluate with the person with depression, taking into account age, comorbid conditions and other risk factors</p> <p><a href="https://www.nice.org.uk/guidance/cg90">https://www.nice.org.uk/guidance/cg90</a></p> |

|                                  |                                                                |                                                                   |                                                         |                                                                                                                                                                                                                                                                                                                                                                                                   |                                                                                             |                                                                                                       |                                                                                                                                                                                                                                                                                                                                                                                                                                                                                                                                                                                                                                                                                                                                                                                                                                         |                                                                                                                                                                                                                                                                                                                                                                                                          |                                                                                                                                                                                                                                                                                                                                                                                                                                                                                                                                                                                                                                                                                                                                                                                                                                                                                                                                                                                                                                                                             |                                                                                                                                                                                                                                                                                                                                                                                                                                                                                                                                                                                                                                                                                                                                                                      |
|----------------------------------|----------------------------------------------------------------|-------------------------------------------------------------------|---------------------------------------------------------|---------------------------------------------------------------------------------------------------------------------------------------------------------------------------------------------------------------------------------------------------------------------------------------------------------------------------------------------------------------------------------------------------|---------------------------------------------------------------------------------------------|-------------------------------------------------------------------------------------------------------|-----------------------------------------------------------------------------------------------------------------------------------------------------------------------------------------------------------------------------------------------------------------------------------------------------------------------------------------------------------------------------------------------------------------------------------------------------------------------------------------------------------------------------------------------------------------------------------------------------------------------------------------------------------------------------------------------------------------------------------------------------------------------------------------------------------------------------------------|----------------------------------------------------------------------------------------------------------------------------------------------------------------------------------------------------------------------------------------------------------------------------------------------------------------------------------------------------------------------------------------------------------|-----------------------------------------------------------------------------------------------------------------------------------------------------------------------------------------------------------------------------------------------------------------------------------------------------------------------------------------------------------------------------------------------------------------------------------------------------------------------------------------------------------------------------------------------------------------------------------------------------------------------------------------------------------------------------------------------------------------------------------------------------------------------------------------------------------------------------------------------------------------------------------------------------------------------------------------------------------------------------------------------------------------------------------------------------------------------------|----------------------------------------------------------------------------------------------------------------------------------------------------------------------------------------------------------------------------------------------------------------------------------------------------------------------------------------------------------------------------------------------------------------------------------------------------------------------------------------------------------------------------------------------------------------------------------------------------------------------------------------------------------------------------------------------------------------------------------------------------------------------|
| <p>4.3.1<br/>4.3.1<br/>4.3.2</p> | <p>Antidepressants<br/>Antidepressants<br/>Antidepressants</p> | <p><i>Maprotiline</i><br/><i>Protriptyline</i><br/>Phenelzine</p> | <p>Not in BNF<br/>Not in BNF<br/>Depressive illness</p> | <p>Adult<br/>Initially 15 mg 3 times a day, dose may be increased if necessary after 2 weeks if response not evident, increased if necessary to 15 mg 4 times a day, doses up to 30 mg three times a day may be used in hospital patients; once satisfactory response has been achieved, reduce dose gradually to lowest suitable maintenance dose (15 mg on alternate days may be adequate).</p> | <p>The effectiveness of the drug may not become apparent in less than 4 weeks therapy</p>   | <p>Response is usually seen within first week; response may not become apparent for up to 4 weeks</p> | <p>1.5.2.6 For people started on antidepressants who are not considered to be at increased risk of suicide, normally see them after 2 weeks. See them regularly thereafter, for example at intervals of 2 to 4 weeks in the first 3 months, and then at longer intervals if response is good.</p> <p>1.5.2.7 A person with depression started on antidepressants who is considered to present an increased suicide risk or is younger than 30 years (because of the potential increased prevalence of suicidal thoughts in the early stages of antidepressant treatment for this group) should normally be seen after 1 week and frequently thereafter as appropriate until the risk is no longer considered clinically important.</p> <p><a href="https://www.nice.org.uk/guidance/cg90">https://www.nice.org.uk/guidance/cg90</a></p> | <p>Due to the possibility of patients undergoing “Withdrawal Syndrome” abrupt withdrawal of phenelzine should be avoided where possible</p>                                                                                                                                                                                                                                                              | <p>long-term maintenance treatment).</p> <p>If possible tricyclic and related antidepressants should be withdrawn slowly.</p> <p>If possible avoid abrupt withdrawal.</p> <p>MAOIs are associated with withdrawal symptoms on cessation of therapy. If possible MAOIs should be withdrawn slowly.</p> <p>Withdrawal effects may occur within 5 days of stopping treatment with antidepressant drugs; they are usually mild and self-limiting, but in some cases may be severe. The risk of withdrawal symptoms is increased if the antidepressant is stopped suddenly after regular administration for 8 weeks or more. The dose should preferably be reduced gradually over about 4 weeks, or longer if withdrawal symptoms emerge (6 months in patients who have been on long-term maintenance treatment).</p> <p>Following remission, antidepressant therapy should be continued at the same dose for at least 6 months (about 12 months in the elderly). Patients with a history of recurrent depression should receive maintenance treatment for at least 2 years.</p> | <p>1.9.1.1 Support and encourage a person who has benefited from taking an antidepressant to continue medication for at least 6 months after remission of an episode of depression.</p> <p>1.9.1.2 Review with the person with depression the need for continued antidepressant treatment beyond 6 months after remission.</p> <p>1.9.1.4 Advise people with depression to continue antidepressants for at least 2 years if they are at risk of relapse</p> <p>1.9.1.5 When deciding whether to continue maintenance treatment beyond 2 years, re-evaluate with the person with depression, taking into account age, comorbid conditions and other risk factors</p> <p><a href="https://www.nice.org.uk/guidance/cg90">https://www.nice.org.uk/guidance/cg90</a></p> |
| <p>4.3.2</p>                     | <p>Antidepressants</p>                                         | <p>Isocarboxazid</p>                                              | <p>Depressive illness</p>                               | <p>Adult<br/>Initially 30 mg daily, dose may be increased if necessary after 4 weeks, increased to 60 mg daily for 4–6 weeks, then reduced to 10–20 mg daily, usual maintenance dose, but up to 40 mg daily may be required.</p> <p>Elderly<br/>5–10 mg daily</p>                                                                                                                                 | <p>Patients should be reviewed every 1–2 weeks at the start of antidepressant treatment</p> | <p>Patients should be reviewed every 1–2 weeks at the start of antidepressant treatment</p>           | <p>1.5.2.6 For people started on antidepressants who are not considered to be at increased risk of suicide, normally see them after 2 weeks. See them regularly thereafter, for example at intervals of 2 to 4 weeks in the first 3 months, and then at longer intervals if response is good.</p> <p>1.5.2.7 A person with depression started on antidepressants who is considered to present an increased suicide risk or is younger than 30 years</p>                                                                                                                                                                                                                                                                                                                                                                                 | <p>If possible avoid abrupt withdrawal.</p> <p>MAOIs are associated with withdrawal symptoms on cessation of therapy. If possible MAOIs should be withdrawn slowly.</p> <p>Withdrawal effects may occur within 5 days of stopping treatment with antidepressant drugs; they are usually mild and self-limiting, but in some cases may be severe. The risk of withdrawal symptoms is increased if the</p> | <p>1.9.1.1 Support and encourage a person who has benefited from taking an antidepressant to continue medication for at least 6 months after remission of an episode of depression.</p> <p>1.9.1.2 Review with the person with depression the need for continued antidepressant treatment beyond 6 months after</p>                                                                                                                                                                                                                                                                                                                                                                                                                                                                                                                                                                                                                                                                                                                                                         |                                                                                                                                                                                                                                                                                                                                                                                                                                                                                                                                                                                                                                                                                                                                                                      |

|       |                 |                 |                    |                                                                                                                                                                                                                                                                                                   |                                                                                      |                                                                                                                                                                                                                                                                                                                                                                                 |                                                                                                                                                                                                                                                                                                                                                                                                                                                                                                                                                                                                                                                                                                                                                                                                                                  |                                                          |                                                                                                                                                                                                                                                                                                                                                                                                                                                                                                                                      |                                                                                                                                                                                                                                                                                                                                                                                                                                                  |
|-------|-----------------|-----------------|--------------------|---------------------------------------------------------------------------------------------------------------------------------------------------------------------------------------------------------------------------------------------------------------------------------------------------|--------------------------------------------------------------------------------------|---------------------------------------------------------------------------------------------------------------------------------------------------------------------------------------------------------------------------------------------------------------------------------------------------------------------------------------------------------------------------------|----------------------------------------------------------------------------------------------------------------------------------------------------------------------------------------------------------------------------------------------------------------------------------------------------------------------------------------------------------------------------------------------------------------------------------------------------------------------------------------------------------------------------------------------------------------------------------------------------------------------------------------------------------------------------------------------------------------------------------------------------------------------------------------------------------------------------------|----------------------------------------------------------|--------------------------------------------------------------------------------------------------------------------------------------------------------------------------------------------------------------------------------------------------------------------------------------------------------------------------------------------------------------------------------------------------------------------------------------------------------------------------------------------------------------------------------------|--------------------------------------------------------------------------------------------------------------------------------------------------------------------------------------------------------------------------------------------------------------------------------------------------------------------------------------------------------------------------------------------------------------------------------------------------|
| 4.3.2 | Antidepressants | Tranlycypromine | Depressive illness | Adult<br>Initially 10 mg twice daily, dose may be increased if necessary after 1 week, increased if necessary to 10 mg daily, dose to be taken in the morning and 20 mg daily, dose to be taken in the afternoon, doses above 30 mg daily, under close supervision only; maintenance 10 mg daily. | Patients should be reviewed every 1–2 weeks at the start of antidepressant treatment | (because of the potential increased prevalence of suicidal thoughts in the early stages of antidepressant treatment for this group) should normally be seen after 1 week and frequently thereafter as appropriate until the risk is no longer considered clinically important.<br><br><a href="https://www.nice.org.uk/guidance/cg90">https://www.nice.org.uk/guidance/cg90</a> | 1.5.2.6 For people started on antidepressants who are not considered to be at increased risk of suicide, normally see them after 2 weeks. See them regularly thereafter, for example at intervals of 2 to 4 weeks in the first 3 months, and then at longer intervals if response is good.<br><br>1.5.2.7 A person with depression started on antidepressants who is considered to present an increased suicide risk or is younger than 30 years (because of the potential increased prevalence of suicidal thoughts in the early stages of antidepressant treatment for this group) should normally be seen after 1 week and frequently thereafter as appropriate until the risk is no longer considered clinically important.<br><br><a href="https://www.nice.org.uk/guidance/cg90">https://www.nice.org.uk/guidance/cg90</a> | Tranlycypromine therapy should be withdrawn gradually    | antidepressant is stopped suddenly after regular administration for 8 weeks or more. The dose should preferably be reduced gradually over about 4 weeks, or longer if withdrawal symptoms emerge (6 months in patients who have been on long-term maintenance treatment).<br><br>Following remission, antidepressant therapy should be continued at the same dose for at least 6 months (about 12 months in the elderly). Patients with a history of recurrent depression should receive maintenance treatment for at least 2 years. | remission.<br><br>1.9.1.4 Advise people with depression to continue antidepressants for at least 2 years if they are at risk of relapse<br><br>1.9.1.5 When deciding whether to continue maintenance treatment beyond 2 years, re-evaluate with the person with depression, taking into account age, comorbid conditions and other risk factors<br><br><a href="https://www.nice.org.uk/guidance/cg90">https://www.nice.org.uk/guidance/cg90</a> |
| 4.3.2 | Antidepressants | Moclobemide     | Depressive illness | Usual dose 150–600 mg daily                                                                                                                                                                                                                                                                       | Patients should be reviewed every 1–2 weeks                                          | 1.5.2.6 For people started on antidepressants who are not considered to be at                                                                                                                                                                                                                                                                                                   | Withdrawal effects may occur within 5 days of stopping treatment with                                                                                                                                                                                                                                                                                                                                                                                                                                                                                                                                                                                                                                                                                                                                                            | 1.9.1.1 Support and encourage a person who has benefited |                                                                                                                                                                                                                                                                                                                                                                                                                                                                                                                                      |                                                                                                                                                                                                                                                                                                                                                                                                                                                  |



|       |                 |             |                         |                                                                                                                                  |                                                                                                                                                                                                                                                                                                                                                                                                                                                                                                                                                                                                                                                                                                                                                                                                           |                                                                                                                                                                                                                                                                                                                                                                                                                                                                                                                                                                                                                                                                                                   |                                                                                                                                                                                                                                                                                                                                                                                                                                                                                                                                                                                                                                                                                                                                                                                                                                                                                                                                                                                                                                                                                                                                                                                                                                                                                                                                                               |
|-------|-----------------|-------------|-------------------------|----------------------------------------------------------------------------------------------------------------------------------|-----------------------------------------------------------------------------------------------------------------------------------------------------------------------------------------------------------------------------------------------------------------------------------------------------------------------------------------------------------------------------------------------------------------------------------------------------------------------------------------------------------------------------------------------------------------------------------------------------------------------------------------------------------------------------------------------------------------------------------------------------------------------------------------------------------|---------------------------------------------------------------------------------------------------------------------------------------------------------------------------------------------------------------------------------------------------------------------------------------------------------------------------------------------------------------------------------------------------------------------------------------------------------------------------------------------------------------------------------------------------------------------------------------------------------------------------------------------------------------------------------------------------|---------------------------------------------------------------------------------------------------------------------------------------------------------------------------------------------------------------------------------------------------------------------------------------------------------------------------------------------------------------------------------------------------------------------------------------------------------------------------------------------------------------------------------------------------------------------------------------------------------------------------------------------------------------------------------------------------------------------------------------------------------------------------------------------------------------------------------------------------------------------------------------------------------------------------------------------------------------------------------------------------------------------------------------------------------------------------------------------------------------------------------------------------------------------------------------------------------------------------------------------------------------------------------------------------------------------------------------------------------------|
| 4.3.2 | Antidepressants | Moclobemide | Social anxiety disorder | Initially 300 mg daily for 3 days, then increased to 600 mg daily in 2 divided doses continued for 8–12 weeks to assess efficacy | <p>at the start of antidepressant treatment</p> <p>increased risk of suicide, normally see them after 2 weeks. See them regularly thereafter, for example at intervals of 2 to 4 weeks in the first 3 months, and then at longer intervals if response is good.</p> <p>1.5.2.7 A person with depression started on antidepressants who is considered to present an increased suicide risk or is younger than 30 years (because of the potential increased prevalence of suicidal thoughts in the early stages of antidepressant treatment for this group) should normally be seen after 1 week and frequently thereafter as appropriate until the risk is no longer considered clinically important.</p> <p><a href="https://www.nice.org.uk/guidance/cg90">https://www.nice.org.uk/guidance/cg90</a></p> | <p>antidepressant drugs; they are usually mild and self-limiting, but in some cases may be severe. The risk of withdrawal symptoms is increased if the antidepressant is stopped suddenly after regular administration for 8 weeks or more. The dose should preferably be reduced gradually over about 4 weeks, or longer if withdrawal symptoms emerge (6 months in patients who have been on long-term maintenance treatment).</p> <p>Following remission, antidepressant treatment should be continued at the same dose for at least 6 months (about 12 months in the elderly). Patients with a history of recurrent depression should receive maintenance treatment for at least 2 years.</p> | <p>from taking an antidepressant to continue medication for at least 6 months after remission of an episode of depression.</p> <p>1.9.1.2 Review with the person with depression the need for continued antidepressant treatment beyond 6 months after remission.</p> <p>1.9.1.4 Advise people with depression to continue antidepressants for at least 2 years if they are at risk of relapse</p> <p>1.9.1.5 When deciding whether to continue maintenance treatment beyond 2 years, re-evaluate with the person with depression, taking into account age, comorbid conditions and other risk factors</p> <p><a href="https://www.nice.org.uk/guidance/cg90">https://www.nice.org.uk/guidance/cg90</a></p> <p>1.3.24 If the person's symptoms of social anxiety disorder have responded well to a pharmacological intervention in the first 3 months, continue it for at least a further 6 months.</p> <p>1.3.25 When stopping a pharmacological intervention, reduce the dose of the drug gradually. If symptoms reappear after the dose is lowered or the drug is stopped, consider increasing the dose, reintroducing the drug or offering individual CBT.</p> <p><a href="https://www.nice.org.uk/guidance/cg159/capter/1-Recommendations#interventions-for-">https://www.nice.org.uk/guidance/cg159/capter/1-Recommendations#interventions-for-</a></p> |
|-------|-----------------|-------------|-------------------------|----------------------------------------------------------------------------------------------------------------------------------|-----------------------------------------------------------------------------------------------------------------------------------------------------------------------------------------------------------------------------------------------------------------------------------------------------------------------------------------------------------------------------------------------------------------------------------------------------------------------------------------------------------------------------------------------------------------------------------------------------------------------------------------------------------------------------------------------------------------------------------------------------------------------------------------------------------|---------------------------------------------------------------------------------------------------------------------------------------------------------------------------------------------------------------------------------------------------------------------------------------------------------------------------------------------------------------------------------------------------------------------------------------------------------------------------------------------------------------------------------------------------------------------------------------------------------------------------------------------------------------------------------------------------|---------------------------------------------------------------------------------------------------------------------------------------------------------------------------------------------------------------------------------------------------------------------------------------------------------------------------------------------------------------------------------------------------------------------------------------------------------------------------------------------------------------------------------------------------------------------------------------------------------------------------------------------------------------------------------------------------------------------------------------------------------------------------------------------------------------------------------------------------------------------------------------------------------------------------------------------------------------------------------------------------------------------------------------------------------------------------------------------------------------------------------------------------------------------------------------------------------------------------------------------------------------------------------------------------------------------------------------------------------------|

|       |                 |            |                    |                                                                                                                                                                                                                                                                                                                                             |                                                                                                                                                                                                          |                                                                                             |                                                                                                                                                                                                                                                                                                   |                                                                                                                                                                                                                                                                                                                                                                                                                                      |                                                                                                                                                                             |                                                                                                                                           |                                                                                                                                                                                                                                                              |                                                                                                                                                                                                                                                                                                                       |                                                                                                                                                                                             |                                                                                                                                                                                                                                   |                                                                                                                                        |                                                                                                                              |                                                                                                                                                                                                         |                                                                                                  |
|-------|-----------------|------------|--------------------|---------------------------------------------------------------------------------------------------------------------------------------------------------------------------------------------------------------------------------------------------------------------------------------------------------------------------------------------|----------------------------------------------------------------------------------------------------------------------------------------------------------------------------------------------------------|---------------------------------------------------------------------------------------------|---------------------------------------------------------------------------------------------------------------------------------------------------------------------------------------------------------------------------------------------------------------------------------------------------|--------------------------------------------------------------------------------------------------------------------------------------------------------------------------------------------------------------------------------------------------------------------------------------------------------------------------------------------------------------------------------------------------------------------------------------|-----------------------------------------------------------------------------------------------------------------------------------------------------------------------------|-------------------------------------------------------------------------------------------------------------------------------------------|--------------------------------------------------------------------------------------------------------------------------------------------------------------------------------------------------------------------------------------------------------------|-----------------------------------------------------------------------------------------------------------------------------------------------------------------------------------------------------------------------------------------------------------------------------------------------------------------------|---------------------------------------------------------------------------------------------------------------------------------------------------------------------------------------------|-----------------------------------------------------------------------------------------------------------------------------------------------------------------------------------------------------------------------------------|----------------------------------------------------------------------------------------------------------------------------------------|------------------------------------------------------------------------------------------------------------------------------|---------------------------------------------------------------------------------------------------------------------------------------------------------------------------------------------------------|--------------------------------------------------------------------------------------------------|
| 4.3.3 | Antidepressants | Citalopram | Depressive illness | <p>Tablets<br/>Adult<br/>20 mg once daily, maximum 40 mg per day.<br/>Elderly<br/>10–20 mg once daily; maximum 20 mg per day.</p> <p>Oral drops<br/>Adult<br/>16 mg once daily, maximum 32 mg per day.<br/>Elderly<br/>8–16 mg daily; maximum 16 mg per day.</p>                                                                            | <p>As with all antidepressant medicinal products, dosage should be reviewed and adjusted, if necessary, within 3 to 4 weeks of initiation of therapy and thereafter as judged clinically appropriate</p> | <p>Patients should be reviewed every 1–2 weeks at the start of antidepressant treatment</p> | <p>1.5.2.6 For people started on antidepressants who are not considered to be at increased risk of suicide, normally see them after 2 weeks. See them regularly thereafter, for example at intervals of 2 to 4 weeks in the first 3 months, and then at longer intervals if response is good.</p> | <p>1.5.2.7 A person with depression started on antidepressants who is considered to present an increased suicide risk or is younger than 30 years (because of the potential increased prevalence of suicidal thoughts in the early stages of antidepressant treatment for this group) should normally be seen after 1 week and frequently thereafter as appropriate until the risk is no longer considered clinically important.</p> | <p><a href="https://www.nice.org.uk/guidance/cg90">https://www.nice.org.uk/guidance/cg90</a></p>                                                                            | <p>Patients with depression should be treated for a sufficient period of at least 6 months to ensure that they are free from symptoms</p> | <p>Following remission, antidepressant treatment should be continued at the same dose for at least 6 months (about 12 months in the elderly). Patients with a history of recurrent depression should receive maintenance treatment for at least 2 years.</p> | <p>Withdrawal effects may occur within 5 days of stopping treatment with antidepressant drugs; they are usually mild and self-limiting, but in some cases may be severe. The risk of withdrawal symptoms is increased if the antidepressant is stopped suddenly after regular administration for 8 weeks or more.</p> | <p>The dose should preferably be reduced gradually over about 4 weeks, or longer if withdrawal symptoms emerge (6 months in patients who have been on long-term maintenance treatment).</p> | <p>adults-with-social-anxiety-disorder-2<br/>1.9.1.1 Support and encourage a person who has benefited from taking an antidepressant to continue medication for at least 6 months after remission of an episode of depression.</p> | <p>1.9.1.2 Review with the person with depression the need for continued antidepressant treatment beyond 6 months after remission.</p> | <p>1.9.1.4 Advise people with depression to continue antidepressants for at least 2 years if they are at risk of relapse</p> | <p>1.9.1.5 When deciding whether to continue maintenance treatment beyond 2 years, re-evaluate with the person with depression, taking into account age, comorbid conditions and other risk factors</p> | <p><a href="https://www.nice.org.uk/guidance/cg90">https://www.nice.org.uk/guidance/cg90</a></p> |
| 4.3.3 | Antidepressants | Citalopram | Panic disorder     | <p>By mouth using tablets<br/>Adult<br/>Usual dose 20–30 mg daily; maximum 40 mg per day.<br/>Elderly<br/>Initially 10 mg daily, increased in steps of 10 mg daily if required, dose to be increased gradually; maximum 20 mg per day.</p> <p>By mouth using oral drops<br/>Adult<br/>Usual dose 16–24 mg daily; maximum 32 mg per day.</p> |                                                                                                                                                                                                          |                                                                                             | <p>1.4.25 If there is no improvement after a 12-week course, an antidepressant from the alternative class (if another medication is appropriate) or another form of therapy (see 1.4.9) should be offered</p>                                                                                     | <p>NICE CG113</p>                                                                                                                                                                                                                                                                                                                                                                                                                    | <p>Patients with panic disorder should be treated for a sufficient period to ensure that they are free from symptoms. This period may be several months or even longer.</p> | <p>Long-term treatment may be necessary for some people and should be offered if needed</p>                                               | <p>•If the person is showing improvement on treatment with an antidepressant, the medication should be continued for at least 6 months after the optimal dose is reached, after which the dose can be tapered</p>                                            | <p>From NICE CG113</p>                                                                                                                                                                                                                                                                                                |                                                                                                                                                                                             |                                                                                                                                                                                                                                   |                                                                                                                                        |                                                                                                                              |                                                                                                                                                                                                         |                                                                                                  |

|       |                 |              |     |                               |                                                                                                                                                                                                                                                                                                             |                                                                                             |                                                                                                                                                                                                                                                                                                                                                                                                                                                                                                                                                                                                                                                                                                                                                                                                                                         |                                                                                                                                                                                                                                                                                                                                                                                                                                                                                                                                                                                                                                                                                                                                                                                |                                                                                                                                                                                                                                                                                                                                                                                                                                                                                                                                                                                                                                                                                                                                                                      |
|-------|-----------------|--------------|-----|-------------------------------|-------------------------------------------------------------------------------------------------------------------------------------------------------------------------------------------------------------------------------------------------------------------------------------------------------------|---------------------------------------------------------------------------------------------|-----------------------------------------------------------------------------------------------------------------------------------------------------------------------------------------------------------------------------------------------------------------------------------------------------------------------------------------------------------------------------------------------------------------------------------------------------------------------------------------------------------------------------------------------------------------------------------------------------------------------------------------------------------------------------------------------------------------------------------------------------------------------------------------------------------------------------------------|--------------------------------------------------------------------------------------------------------------------------------------------------------------------------------------------------------------------------------------------------------------------------------------------------------------------------------------------------------------------------------------------------------------------------------------------------------------------------------------------------------------------------------------------------------------------------------------------------------------------------------------------------------------------------------------------------------------------------------------------------------------------------------|----------------------------------------------------------------------------------------------------------------------------------------------------------------------------------------------------------------------------------------------------------------------------------------------------------------------------------------------------------------------------------------------------------------------------------------------------------------------------------------------------------------------------------------------------------------------------------------------------------------------------------------------------------------------------------------------------------------------------------------------------------------------|
| 4.3.1 | Antidepressants | Escitalopram | POM | Depressive illness            | <p>Elderly<br/>Initially 8 mg once daily, increased in steps of 8 mg if required, dose to be increased gradually; maximum 16 mg per day.</p> <p>By mouth<br/>Adult<br/>10 mg once daily; increased if necessary up to 20 mg daily.</p> <p>Elderly<br/>Initially 5 mg once daily; maximum 10 mg per day.</p> | <p>Patients should be reviewed every 1–2 weeks at the start of antidepressant treatment</p> | <p>1.5.2.6 For people started on antidepressants who are not considered to be at increased risk of suicide, normally see them after 2 weeks. See them regularly thereafter, for example at intervals of 2 to 4 weeks in the first 3 months, and then at longer intervals if response is good.</p> <p>1.5.2.7 A person with depression started on antidepressants who is considered to present an increased suicide risk or is younger than 30 years (because of the potential increased prevalence of suicidal thoughts in the early stages of antidepressant treatment for this group) should normally be seen after 1 week and frequently thereafter as appropriate until the risk is no longer considered clinically important.</p> <p><a href="https://www.nice.org.uk/guidance/cg90">https://www.nice.org.uk/guidance/cg90</a></p> | <p>Following remission, antidepressant treatment should be continued at the same dose for at least 6 months (about 12 months in the elderly). Patients with a history of recurrent depression should receive maintenance treatment for at least 2 years.</p> <p>Withdrawal effects may occur within 5 days of stopping treatment with antidepressant drugs; they are usually mild and self-limiting, but in some cases may be severe. The risk of withdrawal symptoms is increased if the antidepressant is stopped suddenly after regular administration for 8 weeks or more.</p> <p>The dose should preferably be reduced gradually over about 4 weeks, or longer if withdrawal symptoms emerge (6 months in patients who have been on long-term maintenance treatment).</p> | <p>1.9.1.1 Support and encourage a person who has benefited from taking an antidepressant to continue medication for at least 6 months after remission of an episode of depression.</p> <p>1.9.1.2 Review with the person with depression the need for continued antidepressant treatment beyond 6 months after remission.</p> <p>1.9.1.4 Advise people with depression to continue antidepressants for at least 2 years if they are at risk of relapse</p> <p>1.9.1.5 When deciding whether to continue maintenance treatment beyond 2 years, re-evaluate with the person with depression, taking into account age, comorbid conditions and other risk factors</p> <p><a href="https://www.nice.org.uk/guidance/cg90">https://www.nice.org.uk/guidance/cg90</a></p> |
| 4.3.0 | Antidepressants | Escitalopram | POM | Generalised anxiety disorder  | <p>By mouth<br/>Adult<br/>10 mg once daily; increased if necessary up to 20 mg daily.</p> <p>Elderly<br/>Initially 5 mg once daily; maximum 10 mg per day.</p>                                                                                                                                              |                                                                                             | <p>Review the effectiveness and side effects of the drug every 2–4 weeks during the first 3 months of treatment and every 3 months thereafter.</p> <p><a href="https://www.nice.org.uk/guidance/cg113">https://www.nice.org.uk/guidance/cg113</a></p>                                                                                                                                                                                                                                                                                                                                                                                                                                                                                                                                                                                   |                                                                                                                                                                                                                                                                                                                                                                                                                                                                                                                                                                                                                                                                                                                                                                                | <p>If the drug is effective, advise the person to continue taking it for at least a year as the likelihood of relapse is high.</p> <p><a href="https://www.nice.org.uk/guidance/cg113">https://www.nice.org.uk/guidance/cg113</a></p>                                                                                                                                                                                                                                                                                                                                                                                                                                                                                                                                |
| 4.3.1 | Antidepressants | Escitalopram | POM | Obsessive-compulsive disorder | <p>By mouth<br/>Adult<br/>10 mg once daily; increased if necessary up to 20 mg daily.</p> <p>Elderly<br/>Initially 5 mg once</p>                                                                                                                                                                            |                                                                                             |                                                                                                                                                                                                                                                                                                                                                                                                                                                                                                                                                                                                                                                                                                                                                                                                                                         |                                                                                                                                                                                                                                                                                                                                                                                                                                                                                                                                                                                                                                                                                                                                                                                |                                                                                                                                                                                                                                                                                                                                                                                                                                                                                                                                                                                                                                                                                                                                                                      |

|       |                 |              |     |                         |                                                                                                                                                                                                                                                |                                                                                                 |                                                                                                                                                                                                                                                                                                                                                                                                                                                                                                                                                                                                                                                                                                                                                                                                                                         |                                                                                                                                                                                                                                                                                                                                                                                                                                                                                                                                                                                                                                              |
|-------|-----------------|--------------|-----|-------------------------|------------------------------------------------------------------------------------------------------------------------------------------------------------------------------------------------------------------------------------------------|-------------------------------------------------------------------------------------------------|-----------------------------------------------------------------------------------------------------------------------------------------------------------------------------------------------------------------------------------------------------------------------------------------------------------------------------------------------------------------------------------------------------------------------------------------------------------------------------------------------------------------------------------------------------------------------------------------------------------------------------------------------------------------------------------------------------------------------------------------------------------------------------------------------------------------------------------------|----------------------------------------------------------------------------------------------------------------------------------------------------------------------------------------------------------------------------------------------------------------------------------------------------------------------------------------------------------------------------------------------------------------------------------------------------------------------------------------------------------------------------------------------------------------------------------------------------------------------------------------------|
| 4.3.2 | Antidepressants | Escitalopram | POM | Panic disorder          | <p>daily; maximum 10 mg per day.</p> <p>By mouth</p> <p>Adult</p> <p>Initially 5 mg once daily for 7 days, then increased to 10 mg daily; maximum 20 mg per day.</p> <p>Elderly</p> <p>Initially 2.5 mg once daily; maximum 10 mg per day.</p> |                                                                                                 | <p>1.4.25 If there is no improvement after a 12-week course, an antidepressant from the alternative class (if another medication is appropriate) or another form of therapy (see 1.4.9) should be offered</p> <p>NICE CG113</p>                                                                                                                                                                                                                                                                                                                                                                                                                                                                                                                                                                                                         | <p>Long-term treatment may be necessary for some people and should be offered if needed</p> <p>•If the person is showing improvement on treatment with an antidepressant, the medication should be continued for at least 6 months after the optimal dose is reached, after which the dose can be tapered</p> <p>From NICE CG113</p>                                                                                                                                                                                                                                                                                                         |
| 4.3.3 | Antidepressants | Escitalopram | POM | Social anxiety disorder | <p>By mouth</p> <p>Adult</p> <p>Initially 10 mg once daily for 2–4 weeks, dose to be adjusted after 2-4 weeks of treatment; usual dose 5–20 mg daily.</p>                                                                                      |                                                                                                 |                                                                                                                                                                                                                                                                                                                                                                                                                                                                                                                                                                                                                                                                                                                                                                                                                                         |                                                                                                                                                                                                                                                                                                                                                                                                                                                                                                                                                                                                                                              |
| 4.3.3 | Antidepressants | Fluoxetine   | POM | Major depression        | <p>Adult</p> <p>Initially 20 mg daily, maximum 60mg daily</p> <p>Elderly</p> <p>Initially 20 mg daily, usual maximum 40mg daily but dose upto 60mg can be used</p>                                                                             | <p>Dose is increased after 3–4 weeks if necessary, and at appropriate intervals thereafter.</p> | <p>1.5.2.6 For people started on antidepressants who are not considered to be at increased risk of suicide, normally see them after 2 weeks. See them regularly thereafter, for example at intervals of 2 to 4 weeks in the first 3 months, and then at longer intervals if response is good.</p> <p>1.5.2.7 A person with depression started on antidepressants who is considered to present an increased suicide risk or is younger than 30 years (because of the potential increased prevalence of suicidal thoughts in the early stages of antidepressant treatment for this group) should normally be seen after 1 week and frequently thereafter as appropriate until the risk is no longer considered clinically important.</p> <p><a href="https://www.nice.org.uk/guidance/cg90">https://www.nice.org.uk/guidance/cg90</a></p> | <p>1.9.1.1 Support and encourage a person who has benefited from taking an antidepressant to continue medication for at least 6 months after remission of an episode of depression.</p> <p>1.9.1.2 Review with the person with depression the need for continued antidepressant treatment beyond 6 months after remission.</p> <p>1.9.1.4 Advise people with depression to continue antidepressants for at least 2 years if they are at risk of relapse</p> <p>1.9.1.5 When deciding whether to continue maintenance treatment beyond 2 years, re-evaluate with the person with depression, taking into account age, comorbid conditions</p> |

|       |                 |             |     |                                                                                                            |                                                                                                                           |  |                                                                                        |                                                                                                                                                                                                                                                                                                                                                                                                                    |  |                                                                                                                                     |                                                                                                                                                                                                                                                       |                                                                                                                                                                                                                             |
|-------|-----------------|-------------|-----|------------------------------------------------------------------------------------------------------------|---------------------------------------------------------------------------------------------------------------------------|--|----------------------------------------------------------------------------------------|--------------------------------------------------------------------------------------------------------------------------------------------------------------------------------------------------------------------------------------------------------------------------------------------------------------------------------------------------------------------------------------------------------------------|--|-------------------------------------------------------------------------------------------------------------------------------------|-------------------------------------------------------------------------------------------------------------------------------------------------------------------------------------------------------------------------------------------------------|-----------------------------------------------------------------------------------------------------------------------------------------------------------------------------------------------------------------------------|
|       |                 |             |     |                                                                                                            |                                                                                                                           |  |                                                                                        |                                                                                                                                                                                                                                                                                                                                                                                                                    |  |                                                                                                                                     |                                                                                                                                                                                                                                                       | and other risk factors                                                                                                                                                                                                      |
|       |                 |             |     |                                                                                                            |                                                                                                                           |  |                                                                                        |                                                                                                                                                                                                                                                                                                                                                                                                                    |  |                                                                                                                                     |                                                                                                                                                                                                                                                       | <a href="https://www.nice.org.uk/guidance/cg90">https://www.nice.org.uk/guidance/cg90</a>                                                                                                                                   |
| 4.3.3 | Antidepressants | Fluoxetine  | POM | Bulimia nervosa                                                                                            | Adult<br>60 mg daily<br>Elderly<br>Up to 40 mg daily, usual maximum 40mg daily but dose upto 60mg can be used             |  |                                                                                        |                                                                                                                                                                                                                                                                                                                                                                                                                    |  |                                                                                                                                     |                                                                                                                                                                                                                                                       | Long-term efficacy (more than 3 months) has not been demonstrated in bulimia nervosa.                                                                                                                                       |
| 4.3.3 | Antidepressants | Fluoxetine  | POM | Obsessive-compulsive disorder                                                                              | Adult<br>20 mg daily, increased if necessary up to 60mg daily<br>Elderly<br>20mg, increased if necessary up to 40mg daily |  | Dose to be increased gradually, review treatment if inadequate response after 10 weeks | If no improvement is observed within 10 weeks, treatment with fluoxetine should be reconsidered.                                                                                                                                                                                                                                                                                                                   |  |                                                                                                                                     |                                                                                                                                                                                                                                                       | While there are no systematic studies to answer the question of how long to continue fluoxetine treatment, OCD is a chronic condition and it is reasonable to consider continuation beyond 10 weeks in responding patients. |
|       |                 |             |     |                                                                                                            |                                                                                                                           |  |                                                                                        |                                                                                                                                                                                                                                                                                                                                                                                                                    |  |                                                                                                                                     |                                                                                                                                                                                                                                                       | Long-term efficacy (more than 24 weeks) has not been demonstrated in OCD.                                                                                                                                                   |
| 4.3.3 | Antidepressants | Fluoxetine  | POM | Menopausal symptoms, particularly hot flushes, in women with breast cancer (except those taking tamoxifen) | 20mg daily                                                                                                                |  |                                                                                        |                                                                                                                                                                                                                                                                                                                                                                                                                    |  |                                                                                                                                     |                                                                                                                                                                                                                                                       |                                                                                                                                                                                                                             |
| 4.3.3 | Antidepressants | Fluvoxamine | POM | Depressive illness                                                                                         | Maintenance 100 mg daily                                                                                                  |  | Patients should be reviewed every 1–2 weeks at the start of antidepressant treatment   | 1.5.2.6 For people started on antidepressants who are not considered to be at increased risk of suicide, normally see them after 2 weeks. See them regularly thereafter, for example at intervals of 2 to 4 weeks in the first 3 months, and then at longer intervals if response is good.                                                                                                                         |  | Patients with depression should be treated for a sufficient period of at least 6 months to ensure that they are free from symptoms. | Following remission, antidepressant treatment should be continued at the same dose for at least 6 months (about 12 months in the elderly). Patients with a history of recurrent depression should receive maintenance treatment for at least 2 years. | 1.9.1.1 Support and encourage a person who has benefited from taking an antidepressant to continue medication for at least 6 months after remission of an episode of depression.                                            |
|       |                 |             |     |                                                                                                            |                                                                                                                           |  |                                                                                        | 1.5.2.7 A person with depression started on antidepressants who is considered to present an increased suicide risk or is younger than 30 years (because of the potential increased prevalence of suicidal thoughts in the early stages of antidepressant treatment for this group) should normally be seen after 1 week and frequently thereafter as appropriate until the risk is no longer considered clinically |  |                                                                                                                                     |                                                                                                                                                                                                                                                       | 1.9.1.2 Review with the person with depression the need for continued antidepressant treatment beyond 6 months after remission.                                                                                             |
|       |                 |             |     |                                                                                                            |                                                                                                                           |  |                                                                                        |                                                                                                                                                                                                                                                                                                                                                                                                                    |  |                                                                                                                                     |                                                                                                                                                                                                                                                       | 1.9.1.4 Advise people with depression to continue antidepressants for at least 2 years if they are at risk of relapse                                                                                                       |
|       |                 |             |     |                                                                                                            |                                                                                                                           |  |                                                                                        |                                                                                                                                                                                                                                                                                                                                                                                                                    |  |                                                                                                                                     |                                                                                                                                                                                                                                                       | 1.9.1.5 When deciding whether to                                                                                                                                                                                            |

|       |                 |             |     |                               |                                                                                              |                                                                                                                                                                                              |                                                                                                      |                                                                                                                                                                                                                                                                                                                                                                                                                                                                                                                                                                                                                                                                                                                                                                                                                                  |                                                                                                                                                                                                                                                                                                        |                                                                                                                                                                                                                                                       |                                                                                                                                                                                                                                                                                                                                                                                                                                                                                                                                                                                                                                                              |
|-------|-----------------|-------------|-----|-------------------------------|----------------------------------------------------------------------------------------------|----------------------------------------------------------------------------------------------------------------------------------------------------------------------------------------------|------------------------------------------------------------------------------------------------------|----------------------------------------------------------------------------------------------------------------------------------------------------------------------------------------------------------------------------------------------------------------------------------------------------------------------------------------------------------------------------------------------------------------------------------------------------------------------------------------------------------------------------------------------------------------------------------------------------------------------------------------------------------------------------------------------------------------------------------------------------------------------------------------------------------------------------------|--------------------------------------------------------------------------------------------------------------------------------------------------------------------------------------------------------------------------------------------------------------------------------------------------------|-------------------------------------------------------------------------------------------------------------------------------------------------------------------------------------------------------------------------------------------------------|--------------------------------------------------------------------------------------------------------------------------------------------------------------------------------------------------------------------------------------------------------------------------------------------------------------------------------------------------------------------------------------------------------------------------------------------------------------------------------------------------------------------------------------------------------------------------------------------------------------------------------------------------------------|
| 4.3.3 | Antidepressants | Fluvoxamine | POM | Obsessive-compulsive disorder | Maintenance 100–300 mg daily,                                                                | Dosage adjustments should be made carefully on an individual patient basis, to maintain the patients at the lowest effective dose. The need for treatment should be reassessed periodically. | If no improvement in obsessive-compulsive disorder within 10 weeks, treatment should be reconsidered | important.<br><br><a href="https://www.nice.org.uk/guidance/cg90">https://www.nice.org.uk/guidance/cg90</a>                                                                                                                                                                                                                                                                                                                                                                                                                                                                                                                                                                                                                                                                                                                      | While there are no systematic studies to answer the question of how long to continue fluvoxamine treatment, OCD is a chronic condition and it is reasonable to consider continuation beyond 10 weeks in responding patients. Long-term efficacy (more than 24 weeks) has not been demonstrated in OCD. | continue maintenance treatment beyond 2 years, re-evaluate with the person with depression, taking into account age, comorbid conditions and other risk factors                                                                                       |                                                                                                                                                                                                                                                                                                                                                                                                                                                                                                                                                                                                                                                              |
| 4.3.3 | Antidepressants | Paroxetine  | POM | Major depression              | Adult 20 mg daily, maximum 50 mg per day.<br><br>Elderly 20 mg daily; maximum 40 mg per day. | Patients should be reviewed every 1–2 weeks at the start of antidepressant treatment                                                                                                         | Patients should be reviewed every 1–2 weeks at the start of antidepressant treatment                 | 1.5.2.6 For people started on antidepressants who are not considered to be at increased risk of suicide, normally see them after 2 weeks. See them regularly thereafter, for example at intervals of 2 to 4 weeks in the first 3 months, and then at longer intervals if response is good.<br><br>1.5.2.7 A person with depression started on antidepressants who is considered to present an increased suicide risk or is younger than 30 years (because of the potential increased prevalence of suicidal thoughts in the early stages of antidepressant treatment for this group) should normally be seen after 1 week and frequently thereafter as appropriate until the risk is no longer considered clinically important.<br><br><a href="https://www.nice.org.uk/guidance/cg90">https://www.nice.org.uk/guidance/cg90</a> | Patients with depression should be treated for a sufficient period of at least 6 months to ensure that they are free from symptoms.                                                                                                                                                                    | Following remission, antidepressant treatment should be continued at the same dose for at least 6 months (about 12 months in the elderly). Patients with a history of recurrent depression should receive maintenance treatment for at least 2 years. | 1.9.1.1 Support and encourage a person who has benefited from taking an antidepressant to continue medication for at least 6 months after remission of an episode of depression.<br><br>1.9.1.2 Review with the person with depression the need for continued antidepressant treatment beyond 6 months after remission.<br><br>1.9.1.4 Advise people with depression to continue antidepressants for at least 2 years if they are at risk of relapse<br><br>1.9.1.5 When deciding whether to continue maintenance treatment beyond 2 years, re-evaluate with the person with depression, taking into account age, comorbid conditions and other risk factors |

|       |                 |            |     |                                                                                                             |                                                                                                                                                                                     |                                             |                                                                                                                                             |                                                   |                                                                          |                                                                                                                                                                     |
|-------|-----------------|------------|-----|-------------------------------------------------------------------------------------------------------------|-------------------------------------------------------------------------------------------------------------------------------------------------------------------------------------|---------------------------------------------|---------------------------------------------------------------------------------------------------------------------------------------------|---------------------------------------------------|--------------------------------------------------------------------------|---------------------------------------------------------------------------------------------------------------------------------------------------------------------|
| 4.3.3 | Antidepressants | Paroxetine | POM | Social anxiety disorder                                                                                     | Adult<br>20 mg daily, maximum 50 mg per day.                                                                                                                                        | Long-term use should be regularly evaluated |                                                                                                                                             |                                                   |                                                                          |                                                                                                                                                                     |
| 4.3.3 | Antidepressants | Paroxetine | POM | Post-traumatic stress disorder                                                                              | Elderly<br>20 mg daily; maximum 40 mg per day.<br>Adult<br>20 mg daily, maximum 50 mg per day.                                                                                      | Long-term use should be regularly evaluated |                                                                                                                                             |                                                   |                                                                          |                                                                                                                                                                     |
| 4.3.3 | Antidepressants | Paroxetine | POM | Generalised anxiety disorder                                                                                | Elderly<br>20 mg daily; maximum 40 mg per day.<br>Adult<br>20 mg daily, maximum 50 mg per day.                                                                                      | Long-term use should be regularly evaluated | Review the effectiveness and side effects of the drug every 2–4 weeks during the first 3 months of treatment and every 3 months thereafter. |                                                   |                                                                          | If the drug is effective, advise the person to continue taking it for at least a year as the likelihood of relapse is high.                                         |
| 4.3.3 | Antidepressants | Paroxetine | POM | Obsessive-compulsive disorder                                                                               | Elderly<br>20 mg daily; maximum 40 mg per day.<br>Adult<br>Initially 20 mg daily, increased to 40 mg daily, no evidence of greater efficacy at higher doses; maximum 60 mg per day. |                                             | <a href="https://www.nice.org.uk/guidance/cg113">https://www.nice.org.uk/guidance/cg113</a>                                                 |                                                   |                                                                          | Patients with OCD should be treated for a sufficient period to ensure that they are free from symptoms. This period may be several months or even longer            |
| 4.3.3 | Antidepressants | Paroxetine | POM | Panic disorder                                                                                              | Elderly<br>Initially 20 mg daily; maximum 40 mg per day.<br>Adult<br>Initially 10 mg daily, increased to 40 mg daily; maximum 60 mg per day.                                        |                                             |                                                                                                                                             |                                                   |                                                                          | Patients with panic disorder should be treated for a sufficient period to ensure that they are free from symptoms. This period may be several months or even longer |
| 4.3.3 | Antidepressants | Paroxetine | POM | Menopausal symptoms, particularly hot flushes, in women with breast cancer (except those taking tamoxifen). | Elderly<br>Initially 10 mg daily; maximum 40 mg per day.<br>Adult<br>10 mg once daily                                                                                               |                                             |                                                                                                                                             |                                                   |                                                                          |                                                                                                                                                                     |
| 4.3.3 | Antidepressants | Sertraline | POM | Depressive illness                                                                                          | Maintenance 50 mg daily                                                                                                                                                             | Patients should be reviewed every 1–2 weeks | 1.5.2.6 For people started on antidepressants who are not considered to be at                                                               | Longer-term treatment may also be appropriate for | Following remission, antidepressant treatment should be continued at the | 1.9.1.1 Support and encourage a person who has benefited                                                                                                            |

|       |                 |            |     |                                |                                                                                                                                                                       |                                                                                                                                                                                                                                                   |                                                                                                                                                                                                                                                                                                                                                                                                                               |                                                                                                                                                                                                                                                                                                                                       |                                                                                                                                                                              |                                                                                                                                                                                                  |
|-------|-----------------|------------|-----|--------------------------------|-----------------------------------------------------------------------------------------------------------------------------------------------------------------------|---------------------------------------------------------------------------------------------------------------------------------------------------------------------------------------------------------------------------------------------------|-------------------------------------------------------------------------------------------------------------------------------------------------------------------------------------------------------------------------------------------------------------------------------------------------------------------------------------------------------------------------------------------------------------------------------|---------------------------------------------------------------------------------------------------------------------------------------------------------------------------------------------------------------------------------------------------------------------------------------------------------------------------------------|------------------------------------------------------------------------------------------------------------------------------------------------------------------------------|--------------------------------------------------------------------------------------------------------------------------------------------------------------------------------------------------|
|       |                 |            |     |                                |                                                                                                                                                                       | at the start of antidepressant treatment                                                                                                                                                                                                          | increased risk of suicide, normally see them after 2 weeks. See them regularly thereafter, for example at intervals of 2 to 4 weeks in the first 3 months, and then at longer intervals if response is good.                                                                                                                                                                                                                  | prevention of recurrence of major depressive episodes (MDE). In most of the cases, the recommended dose in prevention of recurrence of MDE is the same as the one used during current episode. Patients with depression should be treated for a sufficient period of time of at least 6 months to ensure they are free from symptoms. | same dose for at least 6 months (about 12 months in the elderly). Patients with a history of recurrent depression should receive maintenance treatment for at least 2 years. | from taking an antidepressant to continue medication for at least 6 months after remission of an episode of depression.                                                                          |
|       |                 |            |     |                                |                                                                                                                                                                       |                                                                                                                                                                                                                                                   | 1.5.2.7 A person with depression started on antidepressants who is considered to present an increased suicide risk or is younger than 30 years (because of the potential increased prevalence of suicidal thoughts in the early stages of antidepressant treatment for this group) should normally be seen after 1 week and frequently thereafter as appropriate until the risk is no longer considered clinically important. |                                                                                                                                                                                                                                                                                                                                       |                                                                                                                                                                              | 1.9.1.2 Review with the person with depression with the need for continued antidepressant treatment beyond 6 months after remission.                                                             |
|       |                 |            |     |                                |                                                                                                                                                                       |                                                                                                                                                                                                                                                   | <a href="https://www.nice.org.uk/guidance/cg90">https://www.nice.org.uk/guidance/cg90</a>                                                                                                                                                                                                                                                                                                                                     |                                                                                                                                                                                                                                                                                                                                       |                                                                                                                                                                              | 1.9.1.4 Advise people with depression to continue antidepressants for at least 2 years if they are at risk of relapse                                                                            |
| 4.3.3 | Antidepressants | Sertraline | POM | Obsessive-compulsive disorder  | Initially 50 mg daily, then increased in steps of 50 mg at intervals of at least 1 week if required; maximum 200 mg per day                                           |                                                                                                                                                                                                                                                   |                                                                                                                                                                                                                                                                                                                                                                                                                               |                                                                                                                                                                                                                                                                                                                                       |                                                                                                                                                                              | 1.9.1.5 When deciding whether to continue maintenance treatment beyond 2 years, re-evaluate with the person with depression, taking into account age, comorbid conditions and other risk factors |
| 4.3.3 | Antidepressants | Sertraline | POM | Panic disorder                 | Initially 25 mg daily for 1 week, then increased to 50 mg daily, then increased in steps of 50 mg at intervals of at least 1 week if required; maximum 200 mg per day | Therapy should be initiated at 25 mg/day. After one week, the dose should be increased to 50 mg once daily. This dosage regimen has been shown to reduce the frequency of early treatment emergent side effects characteristic of panic disorder. |                                                                                                                                                                                                                                                                                                                                                                                                                               | Continued treatment in panic disorder and OCD should be evaluated regularly, as relapse prevention has not been shown for these disorders.                                                                                                                                                                                            |                                                                                                                                                                              | <a href="https://www.nice.org.uk/guidance/cg90">https://www.nice.org.uk/guidance/cg90</a>                                                                                                        |
| 4.3.3 | Antidepressants | Sertraline | POM | Post-traumatic stress disorder | Initially 25 mg daily for 1 week, then increased to 50 mg daily, then increased in steps of 50 mg at intervals of at least 1 week if required;                        | Therapy should be initiated at 25 mg/day. After one week, the dose should be increased to 50 mg once daily. This dosage regimen has been shown to reduce the frequency of early treatment emergent side                                           |                                                                                                                                                                                                                                                                                                                                                                                                                               | Continued treatment in panic disorder and OCD should be evaluated regularly, as relapse prevention has not been shown for these disorders.                                                                                                                                                                                            |                                                                                                                                                                              |                                                                                                                                                                                                  |



|       |                 |             |     |                         |                                                                                                                                                                                                    |                                                                                                                                                                                                                                                                                                                                                                            |                                                                                                                                                                                                                                                                                                                 |                                                                                                                                                                                                                                                                                                                                                                                                                                                                                                                                                                                                                                                                                                                                                                                                                                  |                                                                                                                                                                                                                                                                                                                              |                                                                                                                                                                                                                                                                                                                                                                                                                                                                                                                                                                                                                                                              |
|-------|-----------------|-------------|-----|-------------------------|----------------------------------------------------------------------------------------------------------------------------------------------------------------------------------------------------|----------------------------------------------------------------------------------------------------------------------------------------------------------------------------------------------------------------------------------------------------------------------------------------------------------------------------------------------------------------------------|-----------------------------------------------------------------------------------------------------------------------------------------------------------------------------------------------------------------------------------------------------------------------------------------------------------------|----------------------------------------------------------------------------------------------------------------------------------------------------------------------------------------------------------------------------------------------------------------------------------------------------------------------------------------------------------------------------------------------------------------------------------------------------------------------------------------------------------------------------------------------------------------------------------------------------------------------------------------------------------------------------------------------------------------------------------------------------------------------------------------------------------------------------------|------------------------------------------------------------------------------------------------------------------------------------------------------------------------------------------------------------------------------------------------------------------------------------------------------------------------------|--------------------------------------------------------------------------------------------------------------------------------------------------------------------------------------------------------------------------------------------------------------------------------------------------------------------------------------------------------------------------------------------------------------------------------------------------------------------------------------------------------------------------------------------------------------------------------------------------------------------------------------------------------------|
| 4.3.3 | Antidepressants | Sertraline  | POM | Social anxiety disorder | maximum 200 mg per day<br>Initially 25 mg daily for 1 week, then increased to 50 mg daily, then increased in steps of 50 mg at intervals of at least 1 week if required;<br>maximum 200 mg per day | effects characteristic of panic disorder.<br>Therapy should be initiated at 25 mg/day.<br>After one week, the dose should be increased to 50 mg once daily. This dosage regimen has been shown to reduce the frequency of early treatment emergent side effects characteristic of panic disorder.                                                                          |                                                                                                                                                                                                                                                                                                                 |                                                                                                                                                                                                                                                                                                                                                                                                                                                                                                                                                                                                                                                                                                                                                                                                                                  |                                                                                                                                                                                                                                                                                                                              |                                                                                                                                                                                                                                                                                                                                                                                                                                                                                                                                                                                                                                                              |
| 4.3.4 | Antidepressants | Agomelatine | POM | Major depression        | Adult<br>25 mg daily, increased if necessary to 50 mg daily                                                                                                                                        | During treatment transaminases should be monitored periodically after around three weeks, six weeks (end of acute phase), twelve weeks and twenty four weeks (end of maintenance phase) and thereafter when clinically indicated (see also section 4.4).<br>Treatment should be discontinued if transaminases exceed 3 X upper limit of normal (see sections 4.3 and 4.4). | Test liver function before treatment and after 3, 6, 12 and 24 weeks of treatment, and then regularly thereafter when clinically indicated (restart monitoring schedule if dose increased); discontinue if serum transaminases exceed 3 times the upper limit of reference range or symptoms of liver disorder. |                                                                                                                                                                                                                                                                                                                                                                                                                                                                                                                                                                                                                                                                                                                                                                                                                                  | Patients with depression should be treated for a sufficient period of at least 6 months to ensure that they are free of symptoms.                                                                                                                                                                                            |                                                                                                                                                                                                                                                                                                                                                                                                                                                                                                                                                                                                                                                              |
| 4.3.4 | Antidepressants | Duloxetine  | POM | Major depression        | Adult<br>60mg once daily                                                                                                                                                                           |                                                                                                                                                                                                                                                                                                                                                                            |                                                                                                                                                                                                                                                                                                                 | 1.5.2.6 For people started on antidepressants who are not considered to be at increased risk of suicide, normally see them after 2 weeks. See them regularly thereafter, for example at intervals of 2 to 4 weeks in the first 3 months, and then at longer intervals if response is good.<br><br>1.5.2.7 A person with depression started on antidepressants who is considered to present an increased suicide risk or is younger than 30 years (because of the potential increased prevalence of suicidal thoughts in the early stages of antidepressant treatment for this group) should normally be seen after 1 week and frequently thereafter as appropriate until the risk is no longer considered clinically important.<br><br><a href="https://www.nice.org.uk/guidance/cg90">https://www.nice.org.uk/guidance/cg90</a> | After consolidation of the antidepressive response, it is recommended to continue treatment for several months, in order to avoid relapse. In patients responding to duloxetine, and with a history of repeated episodes of major depression, further long-term treatment at a dose of 60 to 120 mg/day could be considered. | 1.9.1.1 Support and encourage a person who has benefited from taking an antidepressant to continue medication for at least 6 months after remission of an episode of depression.<br><br>1.9.1.2 Review with the person with depression the need for continued antidepressant treatment beyond 6 months after remission.<br><br>1.9.1.4 Advise people with depression to continue antidepressants for at least 2 years if they are at risk of relapse<br><br>1.9.1.5 When deciding whether to continue maintenance treatment beyond 2 years, re-evaluate with the person with depression, taking into account age, comorbid conditions and other risk factors |

|       |                 |             |     |                                                                                                                       |                                                                                                                                                                                                                                    |                                                                         |                                                                                                                                                                                                                                                                                                                                                                                                                                                                                                                                             |                                                   |                                                                                             |                                                                                                                                                                                                                                                                                                                                                                         |
|-------|-----------------|-------------|-----|-----------------------------------------------------------------------------------------------------------------------|------------------------------------------------------------------------------------------------------------------------------------------------------------------------------------------------------------------------------------|-------------------------------------------------------------------------|---------------------------------------------------------------------------------------------------------------------------------------------------------------------------------------------------------------------------------------------------------------------------------------------------------------------------------------------------------------------------------------------------------------------------------------------------------------------------------------------------------------------------------------------|---------------------------------------------------|---------------------------------------------------------------------------------------------|-------------------------------------------------------------------------------------------------------------------------------------------------------------------------------------------------------------------------------------------------------------------------------------------------------------------------------------------------------------------------|
| 4.3.4 | Antidepressants | Duloxetine  | POM | Generalised anxiety disorder                                                                                          | Adult<br>Initially 30 mg once daily, increased if necessary to 60 mg once daily; maximum 120 mg per day.                                                                                                                           |                                                                         | Review the effectiveness and side effects of the drug every 2–4 weeks during the first 3 months of treatment and every 3 months thereafter.                                                                                                                                                                                                                                                                                                                                                                                                 |                                                   | <a href="https://www.nice.org.uk/guidance/cg90">https://www.nice.org.uk/guidance/cg90</a>   | If the drug is effective, advise the person to continue taking it for at least a year as the likelihood of relapse is high.                                                                                                                                                                                                                                             |
| 4.3.4 | Antidepressants | Duloxetine  | POM | Diabetic neuropathy                                                                                                   | Adult<br>60 mg once daily; maximum 120 mg per day.                                                                                                                                                                                 | Review treatment at least every 3 months                                | After starting or changing a treatment, carry out an early clinical review of dosage titration, tolerability and adverse effects to assess the suitability of the chosen treatment.                                                                                                                                                                                                                                                                                                                                                         | Discontinue if inadequate response after 2 months | <a href="https://www.nice.org.uk/guidance/cg113">https://www.nice.org.uk/guidance/cg113</a> |                                                                                                                                                                                                                                                                                                                                                                         |
| 4.3.4 | Antidepressants | Duloxetine  | POM | Moderate to severe stress urinary incontinence                                                                        | Adult (female)<br>40 mg twice daily                                                                                                                                                                                                | Patient should be assessed for benefit and tolerability after 2–4 weeks | Carry out regular clinical reviews to assess and monitor the effectiveness of the treatment                                                                                                                                                                                                                                                                                                                                                                                                                                                 |                                                   |                                                                                             |                                                                                                                                                                                                                                                                                                                                                                         |
| 4.3.4 | Antidepressants | Flupentixol | POM | Schizophrenia and other psychoses, particularly with apathy and withdrawal but not mania or psychomotor hyperactivity | Adult<br>Initially 3–9 mg twice daily; maximum 18 mg per day.<br><br>Elderly<br>Initially 0.75–4.5 mg twice daily                                                                                                                  |                                                                         |                                                                                                                                                                                                                                                                                                                                                                                                                                                                                                                                             |                                                   |                                                                                             |                                                                                                                                                                                                                                                                                                                                                                         |
| 4.3.4 | Antidepressants | Flupentixol | POM | Depressive illness                                                                                                    | Adult<br>Initially 1 mg once daily, increased if necessary to 2 mg after 1 week; maximum 3 mg per day.<br><br>Elderly<br>Initially 500 micrograms daily, then increased if necessary to 1 mg after 1 week; maximum 1.5 mg per day. | Discontinue if no response after 1 week at maximum dosage               | 1.5.2.6 For people started on antidepressants who are not considered to be at increased risk of suicide, normally see them after 2 weeks. See them regularly thereafter, for example at intervals of 2 to 4 weeks in the first 3 months, and then at longer intervals if response is good.<br><br>1.5.2.7 A person with depression started on antidepressants who is considered to present an increased suicide risk or is younger than 30 years (because of the potential increased prevalence of suicidal thoughts in the early stages of |                                                   |                                                                                             | 1.9.1.1 Support and encourage a person who has benefited from taking an antidepressant to continue medication for at least 6 months after remission of an episode of depression.<br><br>1.9.1.2 Review with the person with depression the need for continued antidepressant treatment beyond 6 months after remission.<br><br>1.9.1.4 Advise people with depression to |

|       |                 |             |     |                  |                                                                                                       |                                                                                      |                                                                                                                                                                                                                                                                                      |                                                                                                                                                                                                                                                                                                                                                                                                                                                                                                                                                                                                                                                                                                                                                                                                                                  |                                                                                                                                                                                                                                                                                                                                                                                                                                                                                                                                                                                                                                                                                                                                                               |                                                                                                                                                                                                                                                                                                                                                                                       |
|-------|-----------------|-------------|-----|------------------|-------------------------------------------------------------------------------------------------------|--------------------------------------------------------------------------------------|--------------------------------------------------------------------------------------------------------------------------------------------------------------------------------------------------------------------------------------------------------------------------------------|----------------------------------------------------------------------------------------------------------------------------------------------------------------------------------------------------------------------------------------------------------------------------------------------------------------------------------------------------------------------------------------------------------------------------------------------------------------------------------------------------------------------------------------------------------------------------------------------------------------------------------------------------------------------------------------------------------------------------------------------------------------------------------------------------------------------------------|---------------------------------------------------------------------------------------------------------------------------------------------------------------------------------------------------------------------------------------------------------------------------------------------------------------------------------------------------------------------------------------------------------------------------------------------------------------------------------------------------------------------------------------------------------------------------------------------------------------------------------------------------------------------------------------------------------------------------------------------------------------|---------------------------------------------------------------------------------------------------------------------------------------------------------------------------------------------------------------------------------------------------------------------------------------------------------------------------------------------------------------------------------------|
| 4.3.4 | Antidepressants | Mirtazapine | POM | Major depression | Adult<br>Initially 15–30 mg daily, to up to 45 mg once daily                                          | Patients should be reviewed every 1–2 weeks at the start of antidepressant treatment | antidepressant treatment for this group) should normally be seen after 1 week and frequently thereafter as appropriate until the risk is no longer considered clinically important.<br><br><a href="https://www.nice.org.uk/guidance/cg90">https://www.nice.org.uk/guidance/cg90</a> | 1.5.2.6 For people started on antidepressants who are not considered to be at increased risk of suicide, normally see them after 2 weeks. See them regularly thereafter, for example at intervals of 2 to 4 weeks in the first 3 months, and then at longer intervals if response is good.<br><br>1.5.2.7 A person with depression started on antidepressants who is considered to present an increased suicide risk or is younger than 30 years (because of the potential increased prevalence of suicidal thoughts in the early stages of antidepressant treatment for this group) should normally be seen after 1 week and frequently thereafter as appropriate until the risk is no longer considered clinically important.<br><br><a href="https://www.nice.org.uk/guidance/cg90">https://www.nice.org.uk/guidance/cg90</a> | Following remission, antidepressant treatment should be continued at the same dose for at least 6 months (about 12 months in the elderly). Patients with a history of recurrent depression should receive maintenance treatment for at least 2 years.                                                                                                                                                                                                                                                                                                                                                                                                                                                                                                         | continue antidepressants for at least 2 years if they are at risk of relapse<br><br>1.9.1.5 When deciding whether to continue maintenance treatment beyond 2 years, re-evaluate with the person with depression, taking into account age, comorbid conditions and other risk factors<br><br><a href="https://www.nice.org.uk/guidance/cg90">https://www.nice.org.uk/guidance/cg90</a> |
| 4.3.4 | Antidepressants | Reboxetine  | POM | Major depression | Adult<br>4 mg twice daily for 3–4 weeks, then increased if necessary to 10 mg daily in divided doses; | Patients should be reviewed every 1–2 weeks at the start of antidepressant treatment | 1.5.2.6 For people started on antidepressants who are not considered to be at increased risk of suicide, normally see them after 2 weeks. See them regularly thereafter, for example at                                                                                              |                                                                                                                                                                                                                                                                                                                                                                                                                                                                                                                                                                                                                                                                                                                                                                                                                                  | 1.9.1.1 Support and encourage a person who has benefited from taking an antidepressant to continue medication for at least 6 months after remission of an episode of depression.<br><br>1.9.1.2 Review with the person with depression the need for continued antidepressant treatment beyond 6 months after remission.<br><br>1.9.1.4 Advise people with depression to continue antidepressants for at least 2 years if they are at risk of relapse<br><br>1.9.1.5 When deciding whether to continue maintenance treatment beyond 2 years, re-evaluate with the person with depression, taking into account age, comorbid conditions and other risk factors<br><br><a href="https://www.nice.org.uk/guidance/cg90">https://www.nice.org.uk/guidance/cg90</a> |                                                                                                                                                                                                                                                                                                                                                                                       |

maximum 12 mg per day

intervals of 2 to 4 weeks in the first 3 months, and then at longer intervals if response is good.

1.5.2.7 A person with depression started on antidepressants who is considered to present an increased suicide risk or is younger than 30 years (because of the potential increased prevalence of suicidal thoughts in the early stages of antidepressant treatment for this group) should normally be seen after 1 week and frequently thereafter as appropriate until the risk is no longer considered clinically important.

<https://www.nice.org.uk/guidance/cg90>

after remission of an episode of depression.

1.9.1.2 Review with the person with depression the need for continued antidepressant treatment beyond 6 months after remission.

1.9.1.4 Advise people with depression to continue antidepressants for at least 2 years if they are at risk of relapse

1.9.1.5 When deciding whether to continue maintenance treatment beyond 2 years, re-evaluate with the person with depression, taking into account age, comorbid conditions and other risk factors

<https://www.nice.org.uk/guidance/cg90>

4.3.4 Antidepressants Tryptophan POM Treatment-resistant depression (used alone or as adjunct to other antidepressant drugs) (initiated under direction of hospital consultant) 1 g 3 times a day; maximum 6 g per day

1.5.2.6 For people started on antidepressants who are not considered to be at increased risk of suicide, normally see them after 2 weeks. See them regularly thereafter, for example at intervals of 2 to 4 weeks in the first 3 months, and then at longer intervals if response is good.

1.5.2.7 A person with depression started on antidepressants who is considered to present an increased suicide risk or is younger than 30 years (because of the potential increased prevalence of suicidal thoughts in the early stages of antidepressant treatment for this group) should normally be seen after 1 week and frequently thereafter as appropriate until the risk is no longer considered clinically important.

<https://www.nice.org.uk/guidance/cg90>

1.9.1.1 Support and encourage a person who has benefited from taking an antidepressant to continue medication for at least 6 months after remission of an episode of depression.

1.9.1.2 Review with the person with depression the need for continued antidepressant treatment beyond 6 months after remission.

1.9.1.4 Advise people with depression to continue antidepressants for at least 2 years if they are at risk of relapse

1.9.1.5 When deciding whether to continue maintenance treatment beyond 2 years, re-evaluate with the person with

|       |                 |             |     |                                                |                                                                                                                                                                                                                                    |                                                                                             |                                                                                                                                                                                                                                                                                                                                                                                                                                                                                                                                                                                                                                                                                                                                                                                                                                         |                                                                                                                                                                                                                                                              |                                                                                                                                                                                                                                                                                                                                                                                                                                                                                                                                                                                                                                                                                                                                                                                                                                                                                                                                                              |
|-------|-----------------|-------------|-----|------------------------------------------------|------------------------------------------------------------------------------------------------------------------------------------------------------------------------------------------------------------------------------------|---------------------------------------------------------------------------------------------|-----------------------------------------------------------------------------------------------------------------------------------------------------------------------------------------------------------------------------------------------------------------------------------------------------------------------------------------------------------------------------------------------------------------------------------------------------------------------------------------------------------------------------------------------------------------------------------------------------------------------------------------------------------------------------------------------------------------------------------------------------------------------------------------------------------------------------------------|--------------------------------------------------------------------------------------------------------------------------------------------------------------------------------------------------------------------------------------------------------------|--------------------------------------------------------------------------------------------------------------------------------------------------------------------------------------------------------------------------------------------------------------------------------------------------------------------------------------------------------------------------------------------------------------------------------------------------------------------------------------------------------------------------------------------------------------------------------------------------------------------------------------------------------------------------------------------------------------------------------------------------------------------------------------------------------------------------------------------------------------------------------------------------------------------------------------------------------------|
| 4.3.4 | Antidepressants | Venlafaxine | POM | Major depression                               | <p>Immediate-release</p> <p>Initially 75 mg daily in 2 divided doses, then increased if necessary up to 375 mg daily</p> <p>Modified-release</p> <p>Initially 75 mg once daily, increased if necessary up to 375 mg once daily</p> | <p>Patients should be reviewed every 1–2 weeks at the start of antidepressant treatment</p> | <p>1.5.2.6 For people started on antidepressants who are not considered to be at increased risk of suicide, normally see them after 2 weeks. See them regularly thereafter, for example at intervals of 2 to 4 weeks in the first 3 months, and then at longer intervals if response is good.</p> <p>1.5.2.7 A person with depression started on antidepressants who is considered to present an increased suicide risk or is younger than 30 years (because of the potential increased prevalence of suicidal thoughts in the early stages of antidepressant treatment for this group) should normally be seen after 1 week and frequently thereafter as appropriate until the risk is no longer considered clinically important.</p> <p><a href="https://www.nice.org.uk/guidance/cg90">https://www.nice.org.uk/guidance/cg90</a></p> | <p>Following remission, antidepressant treatment should be continued at the same dose for at least 6 months (about 12 months in the elderly). Patients with a history of recurrent depression should receive maintenance treatment for at least 2 years.</p> | <p>depression, taking into account age, comorbid conditions and other risk factors</p> <p><a href="https://www.nice.org.uk/guidance/cg90">https://www.nice.org.uk/guidance/cg90</a></p> <p>1.9.1.1 Support and encourage a person who has benefited from taking an antidepressant to continue medication for at least 6 months after remission of an episode of depression.</p> <p>1.9.1.2 Review with the person with depression the need for continued antidepressant treatment beyond 6 months after remission.</p> <p>1.9.1.4 Advise people with depression to continue antidepressants for at least 2 years if they are at risk of relapse</p> <p>1.9.1.5 When deciding whether to continue maintenance treatment beyond 2 years, re-evaluate with the person with depression, taking into account age, comorbid conditions and other risk factors</p> <p><a href="https://www.nice.org.uk/guidance/cg90">https://www.nice.org.uk/guidance/cg90</a></p> |
| 4.3.4 | Antidepressants | Venlafaxine | POM | Generalised anxiety disorder                   | <p>Modified-release</p> <p>75 mg once daily, increased if necessary up to 225 mg once daily</p>                                                                                                                                    |                                                                                             | <p>Review the effectiveness and side effects of the drug every 2–4 weeks during the first 3 months of treatment and every 3 months thereafter.</p> <p><a href="https://www.nice.org.uk/guidance/cg113">https://www.nice.org.uk/guidance/cg113</a></p>                                                                                                                                                                                                                                                                                                                                                                                                                                                                                                                                                                                   |                                                                                                                                                                                                                                                              | <p>If the drug is effective, advise the person to continue taking it for at least a year as the likelihood of relapse is high.</p> <p><a href="https://www.nice.org.uk/guidance/cg113">https://www.nice.org.uk/guidance/cg113</a></p>                                                                                                                                                                                                                                                                                                                                                                                                                                                                                                                                                                                                                                                                                                                        |
| 4.3.4 | Antidepressants | Venlafaxine | POM | Social anxiety disorder                        | <p>Modified-release medicines</p> <p>75 mg once daily, increased if necessary up to 225 mg once daily</p>                                                                                                                          |                                                                                             |                                                                                                                                                                                                                                                                                                                                                                                                                                                                                                                                                                                                                                                                                                                                                                                                                                         |                                                                                                                                                                                                                                                              |                                                                                                                                                                                                                                                                                                                                                                                                                                                                                                                                                                                                                                                                                                                                                                                                                                                                                                                                                              |
| 4.3.4 | Antidepressants | Venlafaxine | POM | Menopausal symptoms, particularly hot flushes, | <p>Modified-release</p> <p>37.5 mg once daily for one week, then</p>                                                                                                                                                               |                                                                                             |                                                                                                                                                                                                                                                                                                                                                                                                                                                                                                                                                                                                                                                                                                                                                                                                                                         |                                                                                                                                                                                                                                                              |                                                                                                                                                                                                                                                                                                                                                                                                                                                                                                                                                                                                                                                                                                                                                                                                                                                                                                                                                              |

|       |                       |                   |     |                                                 |                                                                                                                                                                                                                                       |                                                                                                                                |  |                                                                                      |                                                                                                                                                                                                                                                                                                                                                                                                                                                                                                                                                                                                                                                                                                                                                                                                                                  |                                                                                                                                         |                                                                                                                     |                                                                                                                                                                                                                                                                                                                                                                                                                                                                                                                                                                                                                                                                                                                                                               |  |
|-------|-----------------------|-------------------|-----|-------------------------------------------------|---------------------------------------------------------------------------------------------------------------------------------------------------------------------------------------------------------------------------------------|--------------------------------------------------------------------------------------------------------------------------------|--|--------------------------------------------------------------------------------------|----------------------------------------------------------------------------------------------------------------------------------------------------------------------------------------------------------------------------------------------------------------------------------------------------------------------------------------------------------------------------------------------------------------------------------------------------------------------------------------------------------------------------------------------------------------------------------------------------------------------------------------------------------------------------------------------------------------------------------------------------------------------------------------------------------------------------------|-----------------------------------------------------------------------------------------------------------------------------------------|---------------------------------------------------------------------------------------------------------------------|---------------------------------------------------------------------------------------------------------------------------------------------------------------------------------------------------------------------------------------------------------------------------------------------------------------------------------------------------------------------------------------------------------------------------------------------------------------------------------------------------------------------------------------------------------------------------------------------------------------------------------------------------------------------------------------------------------------------------------------------------------------|--|
| 4.3.4 | Antidepressants       | Vortioxetine      | POM | in women with breast cancer<br>Major depression | increased if necessary to 75 mg once daily.<br>Adult<br>Initially 10 mg once daily; adjusted according to response to 5–20 mg once daily.<br><br>Elderly<br>Initially 5 mg once daily; increased if necessary up to 20 mg once daily. |                                                                                                                                |  | Patients should be reviewed every 1–2 weeks at the start of antidepressant treatment | 1.5.2.6 For people started on antidepressants who are not considered to be at increased risk of suicide, normally see them after 2 weeks. See them regularly thereafter, for example at intervals of 2 to 4 weeks in the first 3 months, and then at longer intervals if response is good.<br><br>1.5.2.7 A person with depression started on antidepressants who is considered to present an increased suicide risk or is younger than 30 years (because of the potential increased prevalence of suicidal thoughts in the early stages of antidepressant treatment for this group) should normally be seen after 1 week and frequently thereafter as appropriate until the risk is no longer considered clinically important.<br><br><a href="https://www.nice.org.uk/guidance/cg90">https://www.nice.org.uk/guidance/cg90</a> | After the depressive symptoms resolve, treatment for at least 6 months is recommended for consolidation of the antidepressive response. | Manufacturer advises treatment can be stopped abruptly, without need for gradual dose reduction.                    | 1.9.1.1 Support and encourage a person who has benefited from taking an antidepressant to continue medication for at least 6 months after remission of an episode of depression.<br><br>1.9.1.2 Review with the person with depression the need for continued antidepressant treatment beyond 6 months after remission.<br><br>1.9.1.4 Advise people with depression to continue antidepressants for at least 2 years if they are at risk of relapse<br><br>1.9.1.5 When deciding whether to continue maintenance treatment beyond 2 years, re-evaluate with the person with depression, taking into account age, comorbid conditions and other risk factors<br><br><a href="https://www.nice.org.uk/guidance/cg90">https://www.nice.org.uk/guidance/cg90</a> |  |
| 4.3.4 | Antidepressants       | <b>Nefazodone</b> |     | Not in BNF                                      |                                                                                                                                                                                                                                       |                                                                                                                                |  |                                                                                      |                                                                                                                                                                                                                                                                                                                                                                                                                                                                                                                                                                                                                                                                                                                                                                                                                                  |                                                                                                                                         |                                                                                                                     |                                                                                                                                                                                                                                                                                                                                                                                                                                                                                                                                                                                                                                                                                                                                                               |  |
| 4.3.4 | Antidepressants       | <b>Oxatriptan</b> |     | Not in BNF                                      |                                                                                                                                                                                                                                       |                                                                                                                                |  |                                                                                      |                                                                                                                                                                                                                                                                                                                                                                                                                                                                                                                                                                                                                                                                                                                                                                                                                                  |                                                                                                                                         |                                                                                                                     |                                                                                                                                                                                                                                                                                                                                                                                                                                                                                                                                                                                                                                                                                                                                                               |  |
| 4.7.2 | Opioid pain medicines | Buprenorphine     | CD3 | Moderate to severe pain                         | By sublingual administration<br>Adult<br>200–400 micrograms every 6–8 hours.<br><br>By intramuscular injection, or by slow intravenous injection<br>Adult<br>300–600 micrograms every 6–8 hours.                                      | Opioid<br>Aware states that the dose of opioids above which harms outweigh benefits is 120mg oral morphine equivalent/24hours. |  |                                                                                      | Opioid trial<br>If possible, use immediate release morphine (tablets or liquid), prescribed for 1–2 weeks<br>A trial using modified release preparations may take longer (3 weeks or more) to allow for dose adjustments<br><br>Long-term prescribing<br>Oral morphine is 1st choice<br>Patient should be reviewed within 4 weeks (by the initiating prescriber)<br>When stable, review every 6 months.                                                                                                                                                                                                                                                                                                                                                                                                                          |                                                                                                                                         | Avoid abrupt withdrawal after long-term treatment; they should be withdrawn gradually to avoid abstinence symptoms. |                                                                                                                                                                                                                                                                                                                                                                                                                                                                                                                                                                                                                                                                                                                                                               |  |

|       |                       |               |     |                                                                                                                                      |                                                                                                                                                                                                                                                                                                                                                               |                                                                                                                             |                                                                                                                                                            |                                                                                                                                                                                                                                                                                                                                                                                                         |  |                                                                                                                     |
|-------|-----------------------|---------------|-----|--------------------------------------------------------------------------------------------------------------------------------------|---------------------------------------------------------------------------------------------------------------------------------------------------------------------------------------------------------------------------------------------------------------------------------------------------------------------------------------------------------------|-----------------------------------------------------------------------------------------------------------------------------|------------------------------------------------------------------------------------------------------------------------------------------------------------|---------------------------------------------------------------------------------------------------------------------------------------------------------------------------------------------------------------------------------------------------------------------------------------------------------------------------------------------------------------------------------------------------------|--|---------------------------------------------------------------------------------------------------------------------|
| 4.7.2 | Opioid pain medicines | Buprenorphine | CD3 | Premedication                                                                                                                        | By sublingual administration<br>Adult<br>400 micrograms.                                                                                                                                                                                                                                                                                                      |                                                                                                                             |                                                                                                                                                            |                                                                                                                                                                                                                                                                                                                                                                                                         |  | Avoid abrupt withdrawal after long-term treatment; they should be withdrawn gradually to avoid abstinence symptoms. |
| 4.7.2 | Opioid pain medicines | Buprenorphine | CD3 | Intra-operative analgesia                                                                                                            | By intramuscular injection<br>Adult<br>300 micrograms.<br>Slow intravenous injection<br>Adult<br>300–450 micrograms                                                                                                                                                                                                                                           |                                                                                                                             |                                                                                                                                                            |                                                                                                                                                                                                                                                                                                                                                                                                         |  | Avoid abrupt withdrawal after long-term treatment; they should be withdrawn gradually to avoid abstinence symptoms. |
| 4.7.2 | Opioid pain medicines | Buprenorphine | CD3 | Adjunct in the treatment of opioid dependence                                                                                        | Sublingual tablets<br>Adult<br>Usual dose 12–24 mg daily; maximum 32 mg per day.<br><br>Oral lyophilisate<br>Adult<br>Maximum 18 mg per day.                                                                                                                                                                                                                  |                                                                                                                             |                                                                                                                                                            |                                                                                                                                                                                                                                                                                                                                                                                                         |  | Avoid abrupt withdrawal after long-term treatment; they should be withdrawn gradually to avoid abstinence symptoms. |
| 4.7.2 | Opioid pain medicines | Buprenorphine | CD3 | For Bupeaze®: Moderate to severe chronic cancer pain in patients who have not previously received strong opioid analgesic            | By transdermal application using patches<br>Adult<br>Initially 35 micrograms/hour up to every 96 hours, if necessary, dose should be adjusted at intervals of no longer than 96 hours using a patch of the next strength or using 2 patches of the same strength (applied at same time to avoid confusion).<br>Maximum 2 patches can be used at any one time. | Opioid Aware states that the dose of opioids above which harms outweigh benefits is 120mg oral morphine equivalent/24hours. | Analgesic effect should not be evaluated until the system has been worn for 24 hours (to allow for gradual increase in plasma-buprenorphine concentration) | Opioid trial<br>If possible, use immediate release morphine (tablets or liquid), prescribed for 1-2 weeks<br>A trial using modified release preparations may take longer (3 weeks or more) to allow for dose adjustments<br><br>Long-term prescribing<br>Oral morphine is 1st choice<br>Patient should be reviewed within 4 weeks (by the initiating prescriber)<br>When stable, review every 6 months. |  | Avoid abrupt withdrawal after long-term treatment; they should be withdrawn gradually to avoid abstinence symptoms. |
| 4.7.2 | Opioid pain medicines | Buprenorphine | CD3 | For Bupeaze®: Severe pain unresponsive to non-opioid analgesics in patients who have not previously received strong opioid analgesic | By transdermal application using patches<br>Adult<br>Initially 35 micrograms/hour up to every 96 hours, if necessary, dose should be adjusted at intervals of no longer than 96 hours using a patch of the next strength or using 2 patches of the same strength (applied at same                                                                             | Opioid Aware states that the dose of opioids above which harms outweigh benefits is 120mg oral morphine equivalent/24hours. | Analgesic effect should not be evaluated until the system has been worn for 24 hours (to allow for gradual increase in plasma-buprenorphine concentration) | Opioid trial<br>If possible, use immediate release morphine (tablets or liquid), prescribed for 1-2 weeks<br>A trial using modified release preparations may take longer (3 weeks or more) to allow for dose adjustments<br><br>Long-term prescribing<br>Oral morphine is 1st choice<br>Patient should be reviewed within 4 weeks (by the initiating                                                    |  | Avoid abrupt withdrawal after long-term treatment; they should be withdrawn gradually to avoid abstinence symptoms. |

|       |                       |               |                                                 |                                                                                                                                  |                                                                                                                                                                                 |                                                                                                                             |                                                                                                                                                                           |                                                                                                                                                            |                                                    |                                                                                                                                                                                                                                                                                                                                                                                                         |                                                                                                                     |
|-------|-----------------------|---------------|-------------------------------------------------|----------------------------------------------------------------------------------------------------------------------------------|---------------------------------------------------------------------------------------------------------------------------------------------------------------------------------|-----------------------------------------------------------------------------------------------------------------------------|---------------------------------------------------------------------------------------------------------------------------------------------------------------------------|------------------------------------------------------------------------------------------------------------------------------------------------------------|----------------------------------------------------|---------------------------------------------------------------------------------------------------------------------------------------------------------------------------------------------------------------------------------------------------------------------------------------------------------------------------------------------------------------------------------------------------------|---------------------------------------------------------------------------------------------------------------------|
| 4.7.2 | Opioid pain medicines | Buprenorphine | CD3                                             | For Bupeaze®: Moderate to severe chronic cancer pain in patients who have previously received strong opioid analgesic            | time to avoid confusion). Maximum 2 patches can be used at any one time.<br>The initial dose should be based on previous 24-hour opioid requirement, consult product literature | Opioid Aware states that the dose of opioids above which harms outweigh benefits is 120mg oral morphine equivalent/24hours. |                                                                                                                                                                           | Analgesic effect should not be evaluated until the system has been worn for 24 hours (to allow for gradual increase in plasma-buprenorphine concentration) | prescriber)<br>When stable, review every 6 months. | Opioid trial<br>If possible, use immediate release morphine (tablets or liquid), prescribed for 1-2 weeks<br>A trial using modified release preparations may take longer (3 weeks or more) to allow for dose adjustments<br><br>Long-term prescribing<br>Oral morphine is 1st choice<br>Patient should be reviewed within 4 weeks (by the initiating prescriber)<br>When stable, review every 6 months. | Avoid abrupt withdrawal after long-term treatment; they should be withdrawn gradually to avoid abstinence symptoms. |
| 4.7.2 | Opioid pain medicines | Buprenorphine | CD3                                             | For Bupeaze®: Severe pain unresponsive to non-opioid analgesics in patients who have previously received strong opioid analgesic | The initial dose should be based on previous 24-hour opioid requirement, consult product literature                                                                             | Opioid Aware states that the dose of opioids above which harms outweigh benefits is 120mg oral morphine equivalent/24hours. |                                                                                                                                                                           | Analgesic effect should not be evaluated until the system has been worn for 24 hours (to allow for gradual increase in plasma-buprenorphine concentration) |                                                    | Opioid trial<br>If possible, use immediate release morphine (tablets or liquid), prescribed for 1-2 weeks<br>A trial using modified release preparations may take longer (3 weeks or more) to allow for dose adjustments<br><br>Long-term prescribing<br>Oral morphine is 1st choice<br>Patient should be reviewed within 4 weeks (by the initiating prescriber)<br>When stable, review every 6 months. | Avoid abrupt withdrawal after long-term treatment; they should be withdrawn gradually to avoid abstinence symptoms. |
| 4.7.2 | Opioid pain medicines | Codeine       | Tablet - CD5<br>Soln Inj- CD2<br>Oral soln- CD5 | Acute diarrhoea                                                                                                                  | Usual dose 15–60 mg 3–4 times a day                                                                                                                                             |                                                                                                                             |                                                                                                                                                                           |                                                                                                                                                            |                                                    |                                                                                                                                                                                                                                                                                                                                                                                                         | Avoid abrupt withdrawal after long-term treatment; they should be withdrawn gradually to avoid abstinence symptoms. |
| 4.7.2 | Opioid pain medicines | Codeine       | Tablet - CD5<br>Soln Inj- CD2<br>Oral soln- CD5 | Mild to moderate pain                                                                                                            | By mouth<br>Adult 30–60 mg every 4 hours if required; maximum 240 mg per day.<br><br>By intramuscular injection<br>Adult                                                        |                                                                                                                             | The duration of treatment should be limited to 3 days and if no effective pain relief is achieved the patients/carers should be advised to seek the views of a physician. |                                                                                                                                                            |                                                    |                                                                                                                                                                                                                                                                                                                                                                                                         | Avoid abrupt withdrawal after long-term treatment; they should be withdrawn gradually to avoid abstinence symptoms. |



|       |                       |             |                                                 |                                                                   |                                                                                                                                                                                                  |                                                                                                                     |
|-------|-----------------------|-------------|-------------------------------------------------|-------------------------------------------------------------------|--------------------------------------------------------------------------------------------------------------------------------------------------------------------------------------------------|---------------------------------------------------------------------------------------------------------------------|
| 4.7.2 | Opioid pain medicines | Codeine     | Tablet - CD5<br>Soln Inj- CD2<br>Oral soln- CD5 | Short-term treatment of acute moderate pain                       | 30–60 mg every 4 hours if required.<br>Child dose only                                                                                                                                           | Avoid abrupt withdrawal after long-term treatment; they should be withdrawn gradually to avoid abstinence symptoms. |
| 4.7.2 | Opioid pain medicines | Codeine     | Tablet - CD5<br>Soln Inj- CD2<br>Oral soln- CD5 | Dry or painful cough                                              | By mouth using linctus<br>Adult<br>15–30 mg 3–4 times a day.                                                                                                                                     | Avoid abrupt withdrawal after long-term treatment; they should be withdrawn gradually to avoid abstinence symptoms. |
| 4.7.2 | Opioid pain medicines | Co-codamol  | CD5                                             | Mild to moderate pain (using co-codamol 8/500 preparations only)  | 8/500–16/1000 mg every 4–6 hours as required; maximum 64/4000 mg per day.                                                                                                                        | Avoid abrupt withdrawal after long-term treatment; they should be withdrawn gradually to avoid abstinence symptoms. |
| 4.7.2 | Opioid pain medicines | Co-codamol  | CD5                                             | Mild to moderate pain (using co-codamol 15/500 preparations only) | 15/500–30/1000 mg every 4–6 hours as required; maximum 120/4000 mg per day.                                                                                                                      | Avoid abrupt withdrawal after long-term treatment; they should be withdrawn gradually to avoid abstinence symptoms. |
| 4.7.2 | Opioid pain medicines | Co-codamol  | CD5                                             | Severe pain (using co-codamol 30/500 preparations only)           | 30/500–60/1000 mg every 4–6 hours as required; maximum 240/4000 mg per day.                                                                                                                      | Avoid abrupt withdrawal after long-term treatment; they should be withdrawn gradually to avoid abstinence symptoms. |
| 4.7.2 | Opioid pain medicines | Diamorphine | CD2                                             | Acute pain                                                        | By intramuscular injection, or by subcutaneous injection<br>Adult<br>5 mg every 4 hours if required.<br><br>By slow intravenous injection<br>Adult<br>1.25–2.5 mg every 4 hours if required.     | Avoid abrupt withdrawal after long-term treatment; they should be withdrawn gradually to avoid abstinence symptoms. |
| 4.7.2 | Opioid pain medicines | Diamorphine | CD2                                             | Acute pain (heavier, well-muscled patients)                       | By intramuscular injection, or by subcutaneous injection<br>Adult<br>Up to 10 mg every 4 hours if required.<br><br>By slow intravenous injection<br>Adult<br>2.5–5 mg every 4 hours if required. | Avoid abrupt withdrawal after long-term treatment; they should be withdrawn gradually to avoid abstinence symptoms. |

|       |                       |                |                                                                |                                                                   |                                                                                                                                                                                                                                                                                         |                                                                                                                                      |                                                                                                                                                                                                                                                                                                                                                                                                                     |                                                                                                                            |
|-------|-----------------------|----------------|----------------------------------------------------------------|-------------------------------------------------------------------|-----------------------------------------------------------------------------------------------------------------------------------------------------------------------------------------------------------------------------------------------------------------------------------------|--------------------------------------------------------------------------------------------------------------------------------------|---------------------------------------------------------------------------------------------------------------------------------------------------------------------------------------------------------------------------------------------------------------------------------------------------------------------------------------------------------------------------------------------------------------------|----------------------------------------------------------------------------------------------------------------------------|
| 4.7.2 | Opioid pain medicines | Diamorphine    | CD2                                                            | Chronic pain not currently treated with a strong opioid analgesic | <p>By subcutaneous injection, or by intramuscular injection<br/>Adult<br/>Initially 2.5–5 mg every 4 hours, adjusted according to response.</p> <p>By subcutaneous infusion<br/>Adult<br/>Initially 5–10 mg, adjusted according to response, dose to be administered over 24 hours.</p> | <p>Opioid Aware states that the dose of opioids above which harms outweigh benefits is 120mg oral morphine equivalent/24hours. .</p> | <p>Opioid trial<br/>If possible, use immediate release morphine (tablets or liquid), prescribed for 1-2 weeks<br/>A trial using modified release preparations may take longer (3 weeks or more) to allow for dose adjustments</p> <p>Long-term prescribing<br/>Oral morphine is 1st choice<br/>Patient should be reviewed within 4 weeks (by the initiating prescriber)<br/>When stable, review every 6 months.</p> | <p>Avoid abrupt withdrawal after long-term treatment; they should be withdrawn gradually to avoid abstinence symptoms.</p> |
| 4.7.2 | Opioid pain medicines | Diamorphine    | CD2                                                            | Acute pulmonary oedema                                            | <p>By slow intravenous injection<br/>Adult<br/>2.5–5 mg, dose to be administered at a rate of 1 mg/minute.</p>                                                                                                                                                                          |                                                                                                                                      |                                                                                                                                                                                                                                                                                                                                                                                                                     | <p>Avoid abrupt withdrawal after long-term treatment; they should be withdrawn gradually to avoid abstinence symptoms.</p> |
| 4.7.2 | Opioid pain medicines | Diamorphine    | CD2                                                            | Myocardial infarction                                             | <p>By slow intravenous injection<br/>Adult<br/>5 mg, followed by 2.5–5 mg if required, dose to be administered at a rate of 1–2 mg/minute.<br/>Elderly<br/>2.5 mg, followed by 1.25–2.5 mg if required, dose to be administered at a rate of 1–2 mg/minute.</p>                         |                                                                                                                                      |                                                                                                                                                                                                                                                                                                                                                                                                                     | <p>Avoid abrupt withdrawal after long-term treatment; they should be withdrawn gradually to avoid abstinence symptoms.</p> |
| 4.7.2 | Opioid pain medicines | Diamorphine    | CD2                                                            | Myocardial infarction (frail patients)                            | <p>By slow intravenous injection<br/>Adult<br/>2.5 mg, followed by 1.25–2.5 mg if required, dose to be administered at a rate of 1–2 mg/minute.</p>                                                                                                                                     |                                                                                                                                      |                                                                                                                                                                                                                                                                                                                                                                                                                     | <p>Avoid abrupt withdrawal after long-term treatment; they should be withdrawn gradually to avoid abstinence symptoms.</p> |
| 4.7.2 | Opioid pain medicines | Dihydrocodeine | MR tablet-CD5<br>Tablet - CD5<br>Soln inj-CD2<br>Oral soln-CD5 | Moderate to severe pain                                           | <p>By mouth using immediate-release medicines<br/>Adult<br/>30 mg every 4–6 hours as required.</p> <p>By deep subcutaneous injection, or by intramuscular injection</p>                                                                                                                 |                                                                                                                                      |                                                                                                                                                                                                                                                                                                                                                                                                                     | <p>Avoid abrupt withdrawal after long-term treatment; they should be withdrawn gradually to avoid abstinence symptoms.</p> |

|       |                       |                             |                                                                |                                                                               |                                                                                                                                                   |                                                                         |                                                                                                                                                                                                                                        |                                                                                                                                                                             |  |                                                                                                                     |
|-------|-----------------------|-----------------------------|----------------------------------------------------------------|-------------------------------------------------------------------------------|---------------------------------------------------------------------------------------------------------------------------------------------------|-------------------------------------------------------------------------|----------------------------------------------------------------------------------------------------------------------------------------------------------------------------------------------------------------------------------------|-----------------------------------------------------------------------------------------------------------------------------------------------------------------------------|--|---------------------------------------------------------------------------------------------------------------------|
| 4.7.2 | Opioid pain medicines | Dihydrocodeine              | MR tablet-CD5<br>Tablet - CD5<br>Soln inj-CD2<br>Oral soln-CD5 | Chronic severe pain                                                           | Adult<br>Up to 50 mg every 4–6 hours if required.<br>By mouth using modified-release medicines<br>Adult<br>60–120 mg every 12 hours.              |                                                                         |                                                                                                                                                                                                                                        |                                                                                                                                                                             |  | Avoid abrupt withdrawal after long-term treatment; they should be withdrawn gradually to avoid abstinence symptoms. |
| 4.7.2 | Opioid pain medicines | Dihydrocodeine              | MR tablet-CD5<br>Tablet - CD5<br>Soln inj-CD2<br>Oral soln-CD5 | For DF118 Forte®:<br>Severe pain                                              | Adult<br>40–80 mg 3 times a day; maximum 240 mg per day.                                                                                          |                                                                         |                                                                                                                                                                                                                                        |                                                                                                                                                                             |  | Avoid abrupt withdrawal after long-term treatment; they should be withdrawn gradually to avoid abstinence symptoms. |
| 4.7.2 | Opioid pain medicines | Co-dydramol                 | CD5                                                            | Mild to moderate pain (using 10/500 preparations only)                        | By mouth<br>Adult<br>10/500–20/1000 mg every 4–6 hours as required; maximum 80/4000 mg per day.                                                   |                                                                         |                                                                                                                                                                                                                                        |                                                                                                                                                                             |  | Avoid abrupt withdrawal after long-term treatment; they should be withdrawn gradually to avoid abstinence symptoms. |
| 4.7.2 | Opioid pain medicines | Co-dydramol                 | CD5                                                            | Severe pain (using 20/500 preparations only)                                  | By mouth<br>Adult<br>20/500–40/1000 mg every 4–6 hours as required; maximum 160/4000 mg per day.                                                  |                                                                         |                                                                                                                                                                                                                                        |                                                                                                                                                                             |  | Avoid abrupt withdrawal after long-term treatment; they should be withdrawn gradually to avoid abstinence symptoms. |
| 4.7.2 | Opioid pain medicines | Co-dydramol                 | CD5                                                            | Severe pain (using 30/500 preparations only)                                  | By mouth<br>Adult<br>30/500–60/1000 mg every 4–6 hours as required; maximum 240/4000 mg per day.                                                  |                                                                         |                                                                                                                                                                                                                                        |                                                                                                                                                                             |  | Avoid abrupt withdrawal after long-term treatment; they should be withdrawn gradually to avoid abstinence symptoms. |
| 4.7.2 | Opioid pain medicines | Dipipanone (with cyclizine) | CD2                                                            | Acute pain                                                                    | By mouth<br>Adult<br>Initially 1 tablet every 6 hours, then increased if necessary up to 3 tablets every 6 hours, dose to be increased gradually. |                                                                         |                                                                                                                                                                                                                                        |                                                                                                                                                                             |  | Avoid abrupt withdrawal after long-term treatment; they should be withdrawn gradually to avoid abstinence symptoms. |
| 4.7.2 | Opioid pain medicines | Fentanyl                    | CD2                                                            | Chronic intractable pain not currently treated with a strong opioid analgesic | By transdermal application<br>Adult<br>Initially 12 micrograms/hour every 72 hours, alternatively initially 25 micrograms/hour                    | Opioid Aware states that the dose of opioids above which harms outweigh | Evaluation of the analgesic effect should not be made before the system has been worn for 24 hours (to allow for the gradual increase in plasma-fentanyl concentration)—previous analgesic therapy should be phased out gradually from | Opioid trial<br>If possible, use immediate release morphine (tablets or liquid), prescribed for 1-2 weeks<br>A trial using modified release preparations may take longer (3 |  | Avoid abrupt withdrawal after long-term treatment; they should be withdrawn gradually to avoid abstinence symptoms. |

|       |                       |          |     |                                                                                                                                                                                                                                                                                                                |                                                                                                                                                                                                                                                                      |                                                                                                                              |                                 |  |                                                                                                                                                                                                                                                                                                                                                                                          |                                                                                                                     |
|-------|-----------------------|----------|-----|----------------------------------------------------------------------------------------------------------------------------------------------------------------------------------------------------------------------------------------------------------------------------------------------------------------|----------------------------------------------------------------------------------------------------------------------------------------------------------------------------------------------------------------------------------------------------------------------|------------------------------------------------------------------------------------------------------------------------------|---------------------------------|--|------------------------------------------------------------------------------------------------------------------------------------------------------------------------------------------------------------------------------------------------------------------------------------------------------------------------------------------------------------------------------------------|---------------------------------------------------------------------------------------------------------------------|
|       |                       |          |     | every 72 hours. Dose should be adjusted at 48–72 hour intervals in steps of 12–25 micrograms/hour if necessary, more than one patch may be used at a time (but applied at the same time to avoid confusion)— consider additional or alternative analgesic therapy if dose required exceeds 300 micrograms/hour | benefits is 120mg oral morphine equivalent/ 24hours.                                                                                                                                                                                                                 |                                                                                                                              | time of first patch application |  | weeks or more) to allow for dose adjustments                                                                                                                                                                                                                                                                                                                                             |                                                                                                                     |
| 4.7.2 | Opioid pain medicines | Fentanyl | CD2 | Chronic intractable pain currently treated with a strong opioid analgesic                                                                                                                                                                                                                                      | By transdermal application Adult Initial dose based on previous 24-hour opioid requirement (consult product literature)                                                                                                                                              | Opioid Aware states that the dose of opioids above which harms outweigh benefits is 120mg oral morphine equivalent/ 24hours. |                                 |  | Long-term prescribing Oral morphine is 1st choice Patient should be reviewed within 4 weeks (by the initiating prescriber) When stable, review every 6 months.                                                                                                                                                                                                                           |                                                                                                                     |
| 4.7.2 | Opioid pain medicines | Fentanyl | CD2 | Spontaneous respiration: analgesia and enhancement of anaesthesia, during operation                                                                                                                                                                                                                            | By slow intravenous injection Adult Initially 50–100 micrograms (max. per dose 200 micrograms), dose maximum on specialist advice, then 25–50 micrograms as required.<br><br>By intravenous infusion Adult 3–4.8 micrograms/kg/hour, adjusted according to response. |                                                                                                                              |                                 |  | Opioid trial If possible, use immediate release morphine (tablets or liquid), prescribed for 1-2 weeks A trial using modified release preparations may take longer (3 weeks or more) to allow for dose adjustments<br><br>Long-term prescribing Oral morphine is 1st choice Patient should be reviewed within 4 weeks (by the initiating prescriber) When stable, review every 6 months. | Avoid abrupt withdrawal after long-term treatment; they should be withdrawn gradually to avoid abstinence symptoms. |
| 4.7.2 | Opioid pain medicines | Fentanyl | CD2 | Assisted ventilation: analgesia and enhancement                                                                                                                                                                                                                                                                | By slow intravenous injection Adult Initially 300–3500                                                                                                                                                                                                               |                                                                                                                              |                                 |  |                                                                                                                                                                                                                                                                                                                                                                                          | Avoid abrupt withdrawal after long-term treatment; they should be withdrawn gradually to avoid abstinence symptoms. |

|       |                       |          |     |                                                                                |                                                                                                                                                                                                                                                                                                                                                                                                                                                                                                                                                                                                      |  |                                                                                                                     |
|-------|-----------------------|----------|-----|--------------------------------------------------------------------------------|------------------------------------------------------------------------------------------------------------------------------------------------------------------------------------------------------------------------------------------------------------------------------------------------------------------------------------------------------------------------------------------------------------------------------------------------------------------------------------------------------------------------------------------------------------------------------------------------------|--|---------------------------------------------------------------------------------------------------------------------|
|       |                       |          |     | nt of anaesthesia during operation                                             | micrograms, then 100–200 micrograms as required.                                                                                                                                                                                                                                                                                                                                                                                                                                                                                                                                                     |  |                                                                                                                     |
| 4.7.2 | Opioid pain medicines | Fentanyl | CD2 | Assisted ventilation: analgesia and respiratory depression in intensive care   | <p>By intravenous infusion<br/>Adult<br/>Initially 10 micrograms/kg, dose to be given over 10 minutes, then 6 micrograms/kg/hour, adjusted according to response, may require up to 180 micrograms/kg/hour during cardiac surgery.</p> <p>By slow intravenous injection<br/>Adult<br/>Initially 300–3500 micrograms, then 100–200 micrograms as required.</p> <p>By intravenous infusion<br/>Adult<br/>Initially 10 micrograms/kg, dose to be given over 10 minutes, then 6 micrograms/kg/hour, adjusted according to response, may require up to 180 micrograms/kg/hour during cardiac surgery.</p> |  | Avoid abrupt withdrawal after long-term treatment; they should be withdrawn gradually to avoid abstinence symptoms. |
| 4.7.2 | Opioid pain medicines | Fentanyl | CD2 | Breakthrough pain in patients receiving opioid therapy for chronic cancer pain | <p>By buccal administration using lozenges<br/>Adult<br/>Initially 200 micrograms, dose to be given over 15 minutes, then 200 micrograms after 15 minutes if required, no more than 2 dose units for each pain episode; if adequate pain relief not achieved with 1 dose unit for consecutive breakthrough pain episodes, increase the</p>                                                                                                                                                                                                                                                           |  | Avoid abrupt withdrawal after long-term treatment; they should be withdrawn gradually to avoid abstinence symptoms. |

|       |                       |               |     |                       |                                                                                                                                                                                                                                                                                                                                                                                                                                                                                                                                                                                                                                         |                                                                                                                                    |                                                                                                                                                                                                                                                                                                                                                                                                                     |                                                                                                                            |
|-------|-----------------------|---------------|-----|-----------------------|-----------------------------------------------------------------------------------------------------------------------------------------------------------------------------------------------------------------------------------------------------------------------------------------------------------------------------------------------------------------------------------------------------------------------------------------------------------------------------------------------------------------------------------------------------------------------------------------------------------------------------------------|------------------------------------------------------------------------------------------------------------------------------------|---------------------------------------------------------------------------------------------------------------------------------------------------------------------------------------------------------------------------------------------------------------------------------------------------------------------------------------------------------------------------------------------------------------------|----------------------------------------------------------------------------------------------------------------------------|
|       |                       |               |     |                       | <p>strength of the dose unit until adequate pain relief achieved with 4 lozenges or less daily, if more than 4 episodes of breakthrough pain each day, adjust background analgesia</p> <p>By buccal administration using buccal films<br/>Adult<br/>Initially 200 micrograms, adjusted according to response, consult product literature for information on dose adjustments, maximum 1.2 mg per episode of breakthrough pain; leave at least 4 hours between treatment of episodes of breakthrough pain, if more than 4 episodes of breakthrough pain each day occur on more than 4 consecutive days, adjust background analgesia.</p> |                                                                                                                                    |                                                                                                                                                                                                                                                                                                                                                                                                                     |                                                                                                                            |
| 4.7.2 | Opioid pain medicines | Hydromorphone | CD2 | Severe pain in cancer | <p>By mouth using immediate-release medicines<br/>Adult<br/>1.3 mg every 4 hours, dose to be increased if necessary according to severity of pain.</p> <p>By mouth using modified-release medicines<br/>Adult<br/>4 mg every 12 hours, dose to be increased if necessary according to severity of pain.</p>                                                                                                                                                                                                                                                                                                                             | <p>Opioid Aware states that the dose of opioids above which harms outweigh benefits is 120mg oral morphine equivalent/24hours.</p> | <p>Opioid trial<br/>If possible, use immediate release morphine (tablets or liquid), prescribed for 1-2 weeks<br/>A trial using modified release preparations may take longer (3 weeks or more) to allow for dose adjustments</p> <p>Long-term prescribing<br/>Oral morphine is 1st choice<br/>Patient should be reviewed within 4 weeks (by the initiating prescriber)<br/>When stable, review every 6 months.</p> | <p>Avoid abrupt withdrawal after long-term treatment; they should be withdrawn gradually to avoid abstinence symptoms.</p> |
| 4.7.2 | Opioid pain medicines | Meptazinol    | POM | Moderate to severe    | <p>By mouth<br/>Adult</p>                                                                                                                                                                                                                                                                                                                                                                                                                                                                                                                                                                                                               |                                                                                                                                    |                                                                                                                                                                                                                                                                                                                                                                                                                     | <p>Avoid abrupt withdrawal after long-term treatment;</p>                                                                  |

|       |                       |            |     |                                                                                        |                                                                                                                                                                                                                  |                                                                                                                                                                                         |  |                                                                                                                                                                                                                                                                                                                                                                                                         |                                                                                                                     |
|-------|-----------------------|------------|-----|----------------------------------------------------------------------------------------|------------------------------------------------------------------------------------------------------------------------------------------------------------------------------------------------------------------|-----------------------------------------------------------------------------------------------------------------------------------------------------------------------------------------|--|---------------------------------------------------------------------------------------------------------------------------------------------------------------------------------------------------------------------------------------------------------------------------------------------------------------------------------------------------------------------------------------------------------|---------------------------------------------------------------------------------------------------------------------|
|       |                       |            |     | pain, including post-operative pain and renal colic                                    | 200 mg every 3–6 hours as required.<br><br>By intramuscular injection<br>Adult<br>75–100 mg every 2–4 hours if required.<br><br>By slow intravenous injection<br>Adult<br>50–100 mg every 2–4 hours if required. |                                                                                                                                                                                         |  |                                                                                                                                                                                                                                                                                                                                                                                                         | they should be withdrawn gradually to avoid abstinence symptoms.                                                    |
| 4.7.2 | Opioid pain medicines | Meptazinol | POM | Obstetric analgesia                                                                    | By intramuscular injection<br>Adult<br>2 mg/kg, usual dose 100–150 mg.                                                                                                                                           |                                                                                                                                                                                         |  |                                                                                                                                                                                                                                                                                                                                                                                                         | Avoid abrupt withdrawal after long-term treatment; they should be withdrawn gradually to avoid abstinence symptoms. |
| 4.7.2 | Opioid pain medicines | Methadone  | CD2 | Severe pain                                                                            | By mouth, or by subcutaneous injection, or by intramuscular injection<br>Adult<br>5–10 mg every 6–8 hours, adjusted according to response, on prolonged use not to be given more frequently than every 12 hours. | The relative potency of methadone depends on the starting dose and the duration of administration. Conversions to and from methadone should always be undertaken with specialist advice |  | Opioid trial<br>If possible, use immediate release morphine (tablets or liquid), prescribed for 1–2 weeks<br>A trial using modified release preparations may take longer (3 weeks or more) to allow for dose adjustments<br><br>Long-term prescribing<br>Oral morphine is 1st choice<br>Patient should be reviewed within 4 weeks (by the initiating prescriber)<br>When stable, review every 6 months. | Avoid abrupt withdrawal after long-term treatment; they should be withdrawn gradually to avoid abstinence symptoms. |
| 4.7.2 | Opioid pain medicines | Methadone  | CD2 | Adjunct in treatment of opioid dependence                                              | By mouth using oral solution<br>Adult<br>Usual dose 60–120 mg daily.                                                                                                                                             |                                                                                                                                                                                         |  |                                                                                                                                                                                                                                                                                                                                                                                                         | Avoid abrupt withdrawal after long-term treatment; they should be withdrawn gradually to avoid abstinence symptoms. |
| 4.7.2 | Opioid pain medicines | Methadone  | CD2 | Adjunct in treatment of opioid dependence if tolerance low or not known                | By mouth using oral solution<br>Adult<br>Usual dose 60–120 mg daily.                                                                                                                                             |                                                                                                                                                                                         |  |                                                                                                                                                                                                                                                                                                                                                                                                         | Avoid abrupt withdrawal after long-term treatment; they should be withdrawn gradually to avoid abstinence symptoms. |
| 4.7.2 | Opioid pain medicines | Methadone  | CD2 | Adjunct in treatment of opioid dependence if tolerance high (under expert supervision) | By mouth using oral solution<br>Adult<br>Usual dose 60–120 mg daily.                                                                                                                                             |                                                                                                                                                                                         |  |                                                                                                                                                                                                                                                                                                                                                                                                         | Avoid abrupt withdrawal after long-term treatment; they should be withdrawn gradually to avoid abstinence symptoms. |
| 4.7.2 | Opioid pain medicines | Methadone  | CD2 | Cough in terminal disease                                                              | Initially by mouth using linctus<br>Adult<br>1–2 mg every 4–6 hours, (by mouth)                                                                                                                                  |                                                                                                                                                                                         |  |                                                                                                                                                                                                                                                                                                                                                                                                         | Avoid abrupt withdrawal after long-term treatment; they should be withdrawn gradually to avoid abstinence symptoms. |

|       |                       |          |      |              |                                                                                                                                                                                                                                                                                                                                                                                                                                                                                                                                                                                                                                                                                                                                                            |                                                          |  |                                                                                                                                              |                                                                                                                                                                                                                                                       |
|-------|-----------------------|----------|------|--------------|------------------------------------------------------------------------------------------------------------------------------------------------------------------------------------------------------------------------------------------------------------------------------------------------------------------------------------------------------------------------------------------------------------------------------------------------------------------------------------------------------------------------------------------------------------------------------------------------------------------------------------------------------------------------------------------------------------------------------------------------------------|----------------------------------------------------------|--|----------------------------------------------------------------------------------------------------------------------------------------------|-------------------------------------------------------------------------------------------------------------------------------------------------------------------------------------------------------------------------------------------------------|
| 4.7.2 | Opioid pain medicines | Morphine | CD 2 | Pain         | reduced to 1–2 mg twice daily, use twice daily frequency if prolonged use. Child dose only                                                                                                                                                                                                                                                                                                                                                                                                                                                                                                                                                                                                                                                                 |                                                          |  |                                                                                                                                              |                                                                                                                                                                                                                                                       |
| 4.7.2 | Opioid pain medicines | Morphine | CD 2 | Acute pain   | <p>By mouth, or by subcutaneous injection, or by intramuscular injection</p> <p>Adult<br/>Initially 10 mg every 4 hours, adjusted according to response, subcutaneous injection not suitable for oedematous patients, dose can be given more frequently during titration, use dose for elderly in frail patients.</p> <p>Elderly<br/>Initially 5 mg every 4 hours, adjusted according to response, subcutaneous injection not suitable for oedematous patients, dose can be given more frequently during titration.</p> <p>By slow intravenous injection</p> <p>Adult<br/>Initially 5 mg every 4 hours, adjusted according to response, dose can be adjusted more frequently during titration, reduced dose recommended in frail and elderly patients.</p> |                                                          |  |                                                                                                                                              | <p>Avoid abrupt withdrawal after long-term treatment; they should be withdrawn gradually to avoid abstinence symptoms.</p> <p>Avoid abrupt withdrawal after long-term treatment; they should be withdrawn gradually to avoid abstinence symptoms.</p> |
| 4.7.2 | Opioid pain medicines | Morphine | CD 2 | Chronic pain | <p>By mouth, or by subcutaneous injection, or by intramuscular injection</p> <p>Adult<br/>Initially 5–10 mg</p>                                                                                                                                                                                                                                                                                                                                                                                                                                                                                                                                                                                                                                            | Opioid Aware states that the dose of opioids above which |  | <p>Opioid trial<br/>If possible, use immediate release morphine (tablets or liquid), prescribed for 1-2 weeks<br/>A trial using modified</p> | <p>Avoid abrupt withdrawal after long-term treatment; they should be withdrawn gradually to avoid abstinence symptoms.</p>                                                                                                                            |



|       |                       |          |      |                                                       |                                                                                                                                                                                                                                                                                                                                                                                                                           |                                                                                                                                                                                                              |                                                                                                                                                                                                                                                                                                                                                                                                                                                                                                                                                                                                       |                                                                                                                            |
|-------|-----------------------|----------|------|-------------------------------------------------------|---------------------------------------------------------------------------------------------------------------------------------------------------------------------------------------------------------------------------------------------------------------------------------------------------------------------------------------------------------------------------------------------------------------------------|--------------------------------------------------------------------------------------------------------------------------------------------------------------------------------------------------------------|-------------------------------------------------------------------------------------------------------------------------------------------------------------------------------------------------------------------------------------------------------------------------------------------------------------------------------------------------------------------------------------------------------------------------------------------------------------------------------------------------------------------------------------------------------------------------------------------------------|----------------------------------------------------------------------------------------------------------------------------|
| 4.7.2 | Opioid pain medicines | Morphine | CD 2 | Pain (with modified-release 12-hourly preparations)   | <p>every 4 hours, adjusted according to response, subcutaneous injection not suitable for oedematous patients.</p> <p>By rectum<br/>Adult<br/>Initially 15–30 mg every 4 hours, adjusted according to response.</p> <p>By mouth using modified-release medicines<br/>Adult<br/>Every 12 hours, dose adjusted according to daily morphine requirements, dosage requirements should be reviewed if the brand is altered</p> | <p>harms outweigh benefits is 120mg oral morphine equivalent/24hours.</p> <p>Opioid Aware states that the dose of opioids above which harms outweigh benefits is 120mg oral morphine equivalent/24hours.</p> | <p>release preparations may take longer (3 weeks or more) to allow for dose adjustments</p> <p>Long-term prescribing<br/>Oral morphine is 1st choice<br/>Patient should be reviewed within 4 weeks (by the initiating prescriber)<br/>When stable, review every 6 months.</p>                                                                                                                                                                                                                                                                                                                         | <p>Avoid abrupt withdrawal after long-term treatment; they should be withdrawn gradually to avoid abstinence symptoms.</p> |
| 4.7.2 | Opioid pain medicines | Morphine | CD 2 | Pain (with modified-release 24-hourly preparations)   | <p>By mouth using modified-release medicines<br/>Adult<br/>Every 24 hours, dose adjusted according to daily morphine requirements, dosage requirements should be reviewed if the brand is altered.</p>                                                                                                                                                                                                                    | <p>Opioid Aware states that the dose of opioids above which harms outweigh benefits is 120mg oral morphine equivalent/24hours.</p>                                                                           | <p>Long-term prescribing<br/>Oral morphine is 1st choice<br/>Patient should be reviewed within 4 weeks (by the initiating prescriber)<br/>When stable, review every 6 months.</p> <p>Opioid trial<br/>If possible, use immediate release morphine (tablets or liquid), prescribed for 1-2 weeks<br/>A trial using modified release preparations may take longer (3 weeks or more) to allow for dose adjustments</p> <p>Long-term prescribing<br/>Oral morphine is 1st choice<br/>Patient should be reviewed within 4 weeks (by the initiating prescriber)<br/>When stable, review every 6 months.</p> | <p>Avoid abrupt withdrawal after long-term treatment; they should be withdrawn gradually to avoid abstinence symptoms.</p> |
| 4.7.2 | Opioid pain medicines | Morphine | CD 2 | Pain management in palliative care (starting dose for | <p>By mouth<br/>Adult<br/>20–30 mg daily in divided doses, using immediate-release preparation 4-hourly or a 12-</p>                                                                                                                                                                                                                                                                                                      | <p>Opioid Aware states that the dose of opioids above which harms</p>                                                                                                                                        | <p>Long-term prescribing<br/>Oral morphine is 1st choice<br/>Patient should be reviewed within 4 weeks (by the initiating prescriber)<br/>When stable, review every 6 months.</p> <p>Opioid trial<br/>If possible, use immediate release morphine (tablets or liquid), prescribed for 1-2 weeks<br/>A trial using modified release preparations</p>                                                                                                                                                                                                                                                   | <p>Avoid abrupt withdrawal after long-term treatment; they should be withdrawn gradually to avoid abstinence symptoms.</p> |

|       |                       |          |      |                                                                                                           |                                                                                                                                              |                                                                |  |  |                                                                                                                                                                         |                                                                                                                     |
|-------|-----------------------|----------|------|-----------------------------------------------------------------------------------------------------------|----------------------------------------------------------------------------------------------------------------------------------------------|----------------------------------------------------------------|--|--|-------------------------------------------------------------------------------------------------------------------------------------------------------------------------|---------------------------------------------------------------------------------------------------------------------|
|       |                       |          |      | opioid-naïve patients)                                                                                    | hourly modified-release preparation                                                                                                          | outweigh benefits is 120mg oral morphine equivalent/ 24hours.  |  |  | may take longer (3 weeks or more) to allow for dose adjustments                                                                                                         |                                                                                                                     |
| 4.7.2 | Opioid pain medicines | Morphine | CD 2 | Pain management in palliative care (starting dose for patients being switched from a regular weak opioid) | By mouth<br>Adult<br>40–60 mg daily in divided doses, using immediate-release preparation 4-hourly or 12-hourly modified-release preparation |                                                                |  |  | Long-term prescribing<br>Oral morphine is 1st choice<br>Patient should be reviewed within 4 weeks (by the initiating prescriber)<br>When stable, review every 6 months. | Avoid abrupt withdrawal after long-term treatment; they should be withdrawn gradually to avoid abstinence symptoms. |
| 4.7.2 | Opioid pain medicines | Morphine | CD 2 | Pain in palliative care (following initial titration)                                                     | By mouth using immediate-release medicines<br>Adult<br>Usual dose 30 mg every 4 hours; up to 200 mg every 4 hours                            |                                                                |  |  |                                                                                                                                                                         | Avoid abrupt withdrawal after long-term treatment; they should be withdrawn gradually to avoid abstinence symptoms. |
| 4.7.2 | Opioid pain medicines | Morphine | CD 2 | Cough in terminal disease                                                                                 | By mouth using modified-release medicines<br>Adult<br>Usual dose 100 mg every 12 hours; up to 600 mg every 12 hours                          |                                                                |  |  |                                                                                                                                                                         | Avoid abrupt withdrawal after long-term treatment; they should be withdrawn gradually to avoid abstinence symptoms. |
| 4.7.2 | Opioid pain medicines | Morphine | CD 2 | Premedication                                                                                             | By subcutaneous injection, or by intramuscular injection<br>Adult<br>Up to 10 mg, dose to be administered 60–90 minutes before operation.    |                                                                |  |  |                                                                                                                                                                         | Avoid abrupt withdrawal after long-term treatment; they should be withdrawn gradually to avoid abstinence symptoms. |
| 4.7.2 | Opioid pain medicines | Morphine | CD 2 | Patient controlled analgesia (PCA)                                                                        | Consult local protocol                                                                                                                       | Opioid Aware states that the dose of opioids above which harms |  |  | Opioid trial<br>If possible, use immediate release morphine (tablets or liquid), prescribed for 1-2 weeks<br>A trial using modified release preparations                | Avoid abrupt withdrawal after long-term treatment; they should be withdrawn gradually to avoid abstinence symptoms. |

|       |                       |                         |      |                                                                   |                                                                                                                                                                                                                                                                                                   |                                                               |                                                                                                                                                                                                                                                |                                                                                                                     |
|-------|-----------------------|-------------------------|------|-------------------------------------------------------------------|---------------------------------------------------------------------------------------------------------------------------------------------------------------------------------------------------------------------------------------------------------------------------------------------------|---------------------------------------------------------------|------------------------------------------------------------------------------------------------------------------------------------------------------------------------------------------------------------------------------------------------|---------------------------------------------------------------------------------------------------------------------|
| 4.7.2 | Opioid pain medicines | Morphine                | CD 2 | Myocardial infarction                                             | By slow intravenous injection<br>Adult<br>5–10 mg, followed by 5–10 mg if required, dose to be administered at a rate of 1–2 mg/minute, use dose for elderly in frail patients.<br><br>Elderly<br>2.5–5 mg, followed by 2.5–5 mg if required, dose to be administered at a rate of 1–2 mg/minute. | outweigh benefits is 120mg oral morphine equivalent/ 24hours. | may take longer (3 weeks or more) to allow for dose adjustments<br><br>Long-term prescribing<br>Oral morphine is 1st choice<br>Patient should be reviewed within 4 weeks (by the initiating prescriber)<br>When stable, review every 6 months. | Avoid abrupt withdrawal after long-term treatment; they should be withdrawn gradually to avoid abstinence symptoms. |
| 4.7.2 | Opioid pain medicines | Morphine                | CD 2 | Acute pulmonary oedema                                            | By slow intravenous injection<br>Adult<br>5–10 mg, dose to be administered at a rate of 2 mg/minute, use dose for elderly in frail patients.<br>Elderly<br>2.5–5 mg, dose to be administered at a rate of 2 mg/minute.                                                                            |                                                               |                                                                                                                                                                                                                                                | Avoid abrupt withdrawal after long-term treatment; they should be withdrawn gradually to avoid abstinence symptoms. |
| 4.7.2 | Opioid pain medicines | Morphine                | CD 2 | Dyspnoea at rest in palliative care                               | By mouth<br>Adult<br>Initially 5 mg every 4 hours, to be given in carefully titrated doses.                                                                                                                                                                                                       |                                                               |                                                                                                                                                                                                                                                | Avoid abrupt withdrawal after long-term treatment; they should be withdrawn gradually to avoid abstinence symptoms. |
| 4.7.2 | Opioid pain medicines | Morphine plus cyclizine | CD2  | For Cyclimorph-15®: Moderate to severe pain (short-term use only) | By subcutaneous injection, or by intramuscular injection, or by intravenous injection<br>Adult<br>1 mL, do not repeat dose more often than every 4 hours;                                                                                                                                         |                                                               |                                                                                                                                                                                                                                                | Avoid abrupt withdrawal after long-term treatment; they should be withdrawn gradually to avoid abstinence symptoms. |

|       |                       |                         |     |                                                                   |                                                                                                                                                                                                                                                                                                                                                                                                                                                                                                                                                                                                                                                                                                                                              |                                                                                                                     |
|-------|-----------------------|-------------------------|-----|-------------------------------------------------------------------|----------------------------------------------------------------------------------------------------------------------------------------------------------------------------------------------------------------------------------------------------------------------------------------------------------------------------------------------------------------------------------------------------------------------------------------------------------------------------------------------------------------------------------------------------------------------------------------------------------------------------------------------------------------------------------------------------------------------------------------------|---------------------------------------------------------------------------------------------------------------------|
| 4.7.2 | Opioid pain medicines | Morphine plus cyclizine | CD2 | For Cyclimorph-10®: Moderate to severe pain (short-term use only) | <p>maximum 3 doses per day.</p> <p>By subcutaneous injection, or by intramuscular injection, or by intravenous injection</p> <p>Adult<br/>1 mL, do not repeat dose more often than every 4 hours; maximum 3 doses per day.</p>                                                                                                                                                                                                                                                                                                                                                                                                                                                                                                               | Avoid abrupt withdrawal after long-term treatment; they should be withdrawn gradually to avoid abstinence symptoms. |
| 4.7.2 | Opioid pain medicines | Oxycodone               | CD2 | Postoperative pain                                                | <p>By mouth using immediate-release medicines</p> <p>Adult<br/>Initially 5 mg every 4–6 hours, dose to be increased if necessary according to severity of pain, some patients may require higher doses than the maximum daily dose; maximum 400 mg per day.</p> <p>By mouth using modified-release medicines</p> <p>Adult<br/>Initially 10 mg every 12 hours (max. per dose 200 mg every 12 hours), dose to be increased if necessary according to severity of pain, some patients might require higher doses than the maximum daily dose.</p> <p>By slow intravenous injection</p> <p>Adult<br/>1–10 mg every 4 hours as required.</p> <p>By intravenous infusion</p> <p>Adult<br/>Initially 2 mg/hour, adjusted according to response.</p> | Avoid abrupt withdrawal after long-term treatment; they should be withdrawn gradually to avoid abstinence symptoms. |

|       |                       |           |     |             |                                                                                          |                                                                                                          |                                                                                                                                                                                                                                                              |                                                                                                                                                                                                                                                                             |                                                                                       |                                                                                                   |                        |                                                                                                                                    |                                                                                                                                                                                                                                   |                                                                                                                                                                                   |                                                                                                                            |
|-------|-----------------------|-----------|-----|-------------|------------------------------------------------------------------------------------------|----------------------------------------------------------------------------------------------------------|--------------------------------------------------------------------------------------------------------------------------------------------------------------------------------------------------------------------------------------------------------------|-----------------------------------------------------------------------------------------------------------------------------------------------------------------------------------------------------------------------------------------------------------------------------|---------------------------------------------------------------------------------------|---------------------------------------------------------------------------------------------------|------------------------|------------------------------------------------------------------------------------------------------------------------------------|-----------------------------------------------------------------------------------------------------------------------------------------------------------------------------------------------------------------------------------|-----------------------------------------------------------------------------------------------------------------------------------------------------------------------------------|----------------------------------------------------------------------------------------------------------------------------|
| 4.7.2 | Opioid pain medicines | Oxycodone | CD2 | Severe pain | <p>By subcutaneous injection<br/>Adult<br/>Initially 5 mg every 4 hours as required.</p> | <p>By subcutaneous infusion<br/>Adult<br/>Initially 7.5 mg/24 hours, adjusted according to response.</p> | <p>By mouth using immediate-release medicines<br/>Adult<br/>Initially 5 mg every 4–6 hours, dose to be increased if necessary according to severity of pain, some patients may require higher doses than the maximum daily dose; maximum 400 mg per day.</p> | <p>By mouth using modified-release medicines<br/>Adult<br/>Initially 10 mg every 12 hours (max. per dose 200 mg every 12 hours), dose to be increased if necessary according to severity of pain, some patients might require higher doses than the maximum daily dose.</p> | <p>By slow intravenous injection<br/>Adult<br/>1–10 mg every 4 hours as required.</p> | <p>By intravenous infusion<br/>Adult<br/>Initially 2 mg/hour, adjusted according to response.</p> | <p>By subcutaneous</p> | <p>Opioid Aware states that the dose of opioids above which harms outweigh benefits is 120mg oral morphine equivalent/24hours.</p> | <p>Opioid trial<br/>If possible, use immediate release morphine (tablets or liquid), prescribed for 1-2 weeks<br/>A trial using modified release preparations may take longer (3 weeks or more) to allow for dose adjustments</p> | <p>Long-term prescribing<br/>Oral morphine is 1st choice<br/>Patient should be reviewed within 4 weeks (by the initiating prescriber)<br/>When stable, review every 6 months.</p> | <p>Avoid abrupt withdrawal after long-term treatment; they should be withdrawn gradually to avoid abstinence symptoms.</p> |
|-------|-----------------------|-----------|-----|-------------|------------------------------------------------------------------------------------------|----------------------------------------------------------------------------------------------------------|--------------------------------------------------------------------------------------------------------------------------------------------------------------------------------------------------------------------------------------------------------------|-----------------------------------------------------------------------------------------------------------------------------------------------------------------------------------------------------------------------------------------------------------------------------|---------------------------------------------------------------------------------------|---------------------------------------------------------------------------------------------------|------------------------|------------------------------------------------------------------------------------------------------------------------------------|-----------------------------------------------------------------------------------------------------------------------------------------------------------------------------------------------------------------------------------|-----------------------------------------------------------------------------------------------------------------------------------------------------------------------------------|----------------------------------------------------------------------------------------------------------------------------|

|       |                       |           |     |                                            |                                                                                                                                                                                                                                                                                                                                                                                                                                                                                                                                                                                                                                                                                                                                                                                                                                                                                                                                                     |
|-------|-----------------------|-----------|-----|--------------------------------------------|-----------------------------------------------------------------------------------------------------------------------------------------------------------------------------------------------------------------------------------------------------------------------------------------------------------------------------------------------------------------------------------------------------------------------------------------------------------------------------------------------------------------------------------------------------------------------------------------------------------------------------------------------------------------------------------------------------------------------------------------------------------------------------------------------------------------------------------------------------------------------------------------------------------------------------------------------------|
| 4.7.2 | Opioid pain medicines | Oxycodone | CD2 | Moderate to severe pain in palliative care | <p>injection<br/>Adult<br/>Initially 5 mg every 4 hours as required.</p> <p>By subcutaneous infusion<br/>Adult<br/>Initially 7.5 mg/24 hours, adjusted according to response.</p> <p>By mouth using immediate-release medicines<br/>Adult<br/>Initially 5 mg every 4–6 hours, dose to be increased if necessary according to severity of pain, some patients may require higher doses than the maximum daily dose; maximum 400 mg per day.</p> <p>By mouth using modified-release medicines<br/>Adult<br/>Initially 10 mg every 12 hours (max. per dose 200 mg every 12 hours), dose to be increased if necessary according to severity of pain, some patients might require higher doses than the maximum daily dose.</p> <p>By slow intravenous injection<br/>Adult<br/>1–10 mg every 4 hours as required.</p> <p>By intravenous infusion<br/>Adult<br/>Initially 2 mg/hour, adjusted according to response.</p> <p>By subcutaneous injection</p> |
|-------|-----------------------|-----------|-----|--------------------------------------------|-----------------------------------------------------------------------------------------------------------------------------------------------------------------------------------------------------------------------------------------------------------------------------------------------------------------------------------------------------------------------------------------------------------------------------------------------------------------------------------------------------------------------------------------------------------------------------------------------------------------------------------------------------------------------------------------------------------------------------------------------------------------------------------------------------------------------------------------------------------------------------------------------------------------------------------------------------|

Avoid abrupt withdrawal after long-term treatment; they should be withdrawn gradually to avoid abstinence symptoms.

|       |                       |                         |     |                                                                                                 |                                                                                                                                                                                                                            |                                                                                                                                    |                                                                                                                                                                                                                                                                                                                                                                                                                     |                                                                                                                            |
|-------|-----------------------|-------------------------|-----|-------------------------------------------------------------------------------------------------|----------------------------------------------------------------------------------------------------------------------------------------------------------------------------------------------------------------------------|------------------------------------------------------------------------------------------------------------------------------------|---------------------------------------------------------------------------------------------------------------------------------------------------------------------------------------------------------------------------------------------------------------------------------------------------------------------------------------------------------------------------------------------------------------------|----------------------------------------------------------------------------------------------------------------------------|
| 4.7.2 | Opioid pain medicines | Oxycodone               | CD2 | Patient controlled analgesia (PCA)                                                              | <p>Adult<br/>Initially 5 mg every 4 hours as required.</p> <p>By subcutaneous infusion<br/>Adult<br/>Initially 7.5 mg/24 hours, adjusted according to response.<br/>Consult local protocol</p>                             | <p>Opioid Aware states that the dose of opioids above which harms outweigh benefits is 120mg oral morphine equivalent/24hours.</p> | <p>Opioid trial<br/>If possible, use immediate release morphine (tablets or liquid), prescribed for 1-2 weeks<br/>A trial using modified release preparations may take longer (3 weeks or more) to allow for dose adjustments</p> <p>Long-term prescribing<br/>Oral morphine is 1st choice<br/>Patient should be reviewed within 4 weeks (by the initiating prescriber)<br/>When stable, review every 6 months.</p> | <p>Avoid abrupt withdrawal after long-term treatment; they should be withdrawn gradually to avoid abstinence symptoms.</p> |
| 4.7.2 | Opioid pain medicines | Oxycodone (Onexila XL®) | CD2 | Severe pain                                                                                     | <p>By mouth<br/>Adult<br/>Initially 10 mg every 24 hours, dose to be increased if necessary according to severity of pain, some patients may require higher doses than the maximum daily dose; maximum 400 mg per day.</p> | <p>Opioid Aware states that the dose of opioids above which harms outweigh benefits is 120mg oral morphine equivalent/24hours.</p> | <p>Opioid trial<br/>If possible, use immediate release morphine (tablets or liquid), prescribed for 1-2 weeks<br/>A trial using modified release preparations may take longer (3 weeks or more) to allow for dose adjustments</p> <p>Long-term prescribing<br/>Oral morphine is 1st choice<br/>Patient should be reviewed within 4 weeks (by the initiating prescriber)<br/>When stable, review every 6 months.</p> | <p>Avoid abrupt withdrawal after long-term treatment; they should be withdrawn gradually to avoid abstinence symptoms.</p> |
| 4.7.2 | Opioid pain medicines | Oxycodone with naloxone | CD2 | Severe pain requiring opioid analgesia in patients not currently treated with opioid analgesics | <p>By mouth<br/>Adult<br/>Initially 10/5 mg every 12 hours (max. per dose 40/20 mg every 12 hours), dose to be increased according to response; patients already receiving opioid analgesics can</p>                       | <p>Opioid Aware states that the dose of opioids above which harms outweigh benefits is 120mg oral morphine</p>                     | <p>Opioid trial<br/>If possible, use immediate release morphine (tablets or liquid), prescribed for 1-2 weeks<br/>A trial using modified release preparations may take longer (3 weeks or more) to allow for dose adjustments</p> <p>Long-term prescribing<br/>Oral morphine is 1st choice<br/>Patient should be reviewed within 4 weeks (by the initiating prescriber)<br/>When stable, review every 6 months.</p> | <p>Avoid abrupt withdrawal after long-term treatment; they should be withdrawn gradually to avoid abstinence symptoms.</p> |

|       |                       |                         |     |                                                                                                                                    |                                                                                                                                                                                                                                                                                   |                                                                                                                             |  |  |                                                                                                                                                                         |                                                                                                                     |
|-------|-----------------------|-------------------------|-----|------------------------------------------------------------------------------------------------------------------------------------|-----------------------------------------------------------------------------------------------------------------------------------------------------------------------------------------------------------------------------------------------------------------------------------|-----------------------------------------------------------------------------------------------------------------------------|--|--|-------------------------------------------------------------------------------------------------------------------------------------------------------------------------|---------------------------------------------------------------------------------------------------------------------|
|       |                       |                         |     |                                                                                                                                    | start with a higher dose.                                                                                                                                                                                                                                                         | equivalent/24hours.                                                                                                         |  |  | Long-term prescribing<br>Oral morphine is 1st choice<br>Patient should be reviewed within 4 weeks (by the initiating prescriber)<br>When stable, review every 6 months. |                                                                                                                     |
| 4.7.2 | Opioid pain medicines | Oxycodone with naloxone | CD2 | Second-line treatment of symptomatic severe to very severe idiopathic restless legs syndrome after failure of dopaminergic therapy | By mouth<br>Adult<br>Initially 5/2.5 mg every 12 hours, adjusted weekly according to response, usual dose 10/5 mg every 12 hours; maximum 60/30 mg per day.                                                                                                                       | Opioid Aware states that the dose of opioids above which harms outweigh benefits is 120mg oral morphine equivalent/24hours. |  |  |                                                                                                                                                                         | Avoid abrupt withdrawal after long-term treatment; they should be withdrawn gradually to avoid abstinence symptoms. |
| 4.7.2 | Opioid pain medicines | <b>Papaveretum</b>      | CD2 | Postoperative analgesia                                                                                                            | By subcutaneous injection, or by intramuscular injection<br>Adult<br>7.7–15.4 mg every 4 hours if required.<br>Elderly<br>Initially 7.7 mg every 4 hours if required.                                                                                                             |                                                                                                                             |  |  |                                                                                                                                                                         | Avoid abrupt withdrawal after long-term treatment; they should be withdrawn gradually to avoid abstinence symptoms. |
| 4.7.2 | Opioid pain medicines | <b>Papaveretum</b>      | CD2 | Severe chronic pain                                                                                                                | By intravenous injection<br>Adult<br>Use 25 to 50% of the corresponding subcutaneous/intramuscular dose.<br>By subcutaneous injection, or by intramuscular injection<br>Adult<br>7.7–15.4 mg every 4 hours if required.<br>Elderly<br>Initially 7.7 mg every 4 hours if required. |                                                                                                                             |  |  |                                                                                                                                                                         | Avoid abrupt withdrawal after long-term treatment; they should be withdrawn gradually to avoid abstinence symptoms. |
| 4.7.2 | Opioid pain medicines | <b>Papaveretum</b>      | CD2 | Premedication                                                                                                                      | By intravenous injection<br>Adult<br>Use 25 to 50% of the corresponding subcutaneous/intramuscular dose.<br>By subcutaneous injection, or by intramuscular injection<br>Adult<br>7.7–15.4 mg                                                                                      |                                                                                                                             |  |  |                                                                                                                                                                         | Avoid abrupt withdrawal after long-term treatment; they should be withdrawn gradually to avoid abstinence symptoms. |



|       |                       |             |     |                         |                                                                                                                                                                                                                                                                                                                                                                                                                                                                                                                                                 |  |                                                                                                                     |
|-------|-----------------------|-------------|-----|-------------------------|-------------------------------------------------------------------------------------------------------------------------------------------------------------------------------------------------------------------------------------------------------------------------------------------------------------------------------------------------------------------------------------------------------------------------------------------------------------------------------------------------------------------------------------------------|--|---------------------------------------------------------------------------------------------------------------------|
| 4.7.2 | Opioid pain medicines | Pentazocine | CD3 | Moderate to severe pain | Elderly<br>7.7 mg<br>By mouth<br>Usual dose 25–100 mg every 3–4 hours; maximum 600 mg per day                                                                                                                                                                                                                                                                                                                                                                                                                                                   |  | Avoid abrupt withdrawal after long-term treatment; they should be withdrawn gradually to avoid abstinence symptoms. |
| 4.7.2 | Opioid pain medicines | Pentazocine | CD3 | Moderate pain           | By subcutaneous injection, or by intramuscular injection, or by intravenous injection<br>Adult                                                                                                                                                                                                                                                                                                                                                                                                                                                  |  | Avoid abrupt withdrawal after long-term treatment; they should be withdrawn gradually to avoid abstinence symptoms. |
| 4.7.2 | Opioid pain medicines | Pentazocine | CD3 | Severe pain             | 30 mg every 3–4 hours as required; maximum 360 mg per day.<br>By subcutaneous injection, or by intramuscular injection, or by intravenous injection<br>Adult                                                                                                                                                                                                                                                                                                                                                                                    |  | Avoid abrupt withdrawal after long-term treatment; they should be withdrawn gradually to avoid abstinence symptoms. |
| 4.7.2 | Opioid pain medicines | Pethidine   | CD2 | Acute pain              | 45–60 mg every 3–4 hours as required; maximum 360 mg per day.<br>By mouth<br>Adult<br>50–150 mg every 4 hours.<br><br>By subcutaneous injection, or by intramuscular injection<br><br>Adult<br>25–100 mg, then 25–100 mg after 4 hours, for debilitated patients use dose described for elderly patients.<br>Elderly<br>Initially 25 mg, then 25–100 mg after 4 hours.<br><br>By slow intravenous injection<br><br>Adult<br>25–50 mg, then 25–50 mg after 4 hours, for debilitated patients use dose described for elderly patients.<br>Elderly |  | Avoid abrupt withdrawal after long-term treatment; they should be withdrawn gradually to avoid abstinence symptoms. |

|       |                       |            |     |                                                                                |                                                                                                                                                                                                                                                                                                                                |                                                                                                                             |                                                                                                                                                                        |  |                                                                                                                                                                                                                          |                                                                                                                                                                         |                                                                                                                     |
|-------|-----------------------|------------|-----|--------------------------------------------------------------------------------|--------------------------------------------------------------------------------------------------------------------------------------------------------------------------------------------------------------------------------------------------------------------------------------------------------------------------------|-----------------------------------------------------------------------------------------------------------------------------|------------------------------------------------------------------------------------------------------------------------------------------------------------------------|--|--------------------------------------------------------------------------------------------------------------------------------------------------------------------------------------------------------------------------|-------------------------------------------------------------------------------------------------------------------------------------------------------------------------|---------------------------------------------------------------------------------------------------------------------|
| 4.7.2 | Opioid pain medicines | Pethidine  | CD2 | Obstetric analgesia                                                            | Initially 25 mg, then 25–50 mg after 4 hours.<br>By subcutaneous injection, or by intramuscular injection<br>Adult<br>50–100 mg, then 50–100 mg after 1–3 hours if required;<br>maximum 400 mg per day.                                                                                                                        |                                                                                                                             |                                                                                                                                                                        |  |                                                                                                                                                                                                                          |                                                                                                                                                                         | Avoid abrupt withdrawal after long-term treatment; they should be withdrawn gradually to avoid abstinence symptoms. |
| 4.7.2 | Opioid pain medicines | Pethidine  | CD2 | Premedication                                                                  | By intramuscular injection<br>Adult<br>25–100 mg, dose to be given 1 hour before operation, for debilitated patients use dose described for elderly patients.<br>Elderly<br>25 mg, dose to be given 1 hour before operation.                                                                                                   |                                                                                                                             |                                                                                                                                                                        |  |                                                                                                                                                                                                                          |                                                                                                                                                                         | Avoid abrupt withdrawal after long-term treatment; they should be withdrawn gradually to avoid abstinence symptoms. |
| 4.7.2 | Opioid pain medicines | Pethidine  | CD2 | Postoperative pain                                                             | By subcutaneous injection, or by intramuscular injection<br>Adult<br>25–100 mg every 2–3 hours if required, for debilitated patients use dose described for elderly patients.<br>Elderly<br>Initially 25 mg every 2–3 hours if required.                                                                                       |                                                                                                                             |                                                                                                                                                                        |  |                                                                                                                                                                                                                          |                                                                                                                                                                         | Avoid abrupt withdrawal after long-term treatment; they should be withdrawn gradually to avoid abstinence symptoms. |
| 4.7.2 | Opioid pain medicines | Tapentadol | CD2 | Moderate to severe acute pain which can be managed only with opioid analgesics | By mouth using immediate release medicines:<br>Initially 50 mg every 4–6 hours, adjusted according to response, maximum 700 mg in the first 24 hours, during the first 24 hours of treatment, an additional dose of 50 mg may be taken 1 hour after the initial dose, if pain control not achieved;<br>maximum 600 mg per day. | Opioid Aware states that the dose of opioids above which harms outweigh benefits is 120mg oral morphine equivalent/24hours. | The dosing regimen should be individualised according to the severity of pain being treated, the previous treatment experience and the ability to monitor the patient. |  | Opioid trial<br>If possible, use immediate release morphine (tablets or liquid), prescribed for 1-2 weeks<br>A trial using modified release preparations may take longer (3 weeks or more) to allow for dose adjustments | Long-term prescribing<br>Oral morphine is 1st choice<br>Patient should be reviewed within 4 weeks (by the initiating prescriber)<br>When stable, review every 6 months. | Avoid abrupt withdrawal after long-term treatment; they should be withdrawn gradually to avoid abstinence symptoms. |
| 4.7.2 | Opioid pain medicines | Tapentadol | CD2 | Severe chronic pain                                                            | By mouth, using modified-release                                                                                                                                                                                                                                                                                               | Opioid Aware                                                                                                                | After initiation of therapy the dose should be                                                                                                                         |  | Opioid trial<br>If possible, use                                                                                                                                                                                         |                                                                                                                                                                         | Avoid abrupt withdrawal after long-term treatment;                                                                  |

|       |                       |          |     |                                 |                                                                                                                                                                             |                                                                                                                                                                                             |                                                                                                                                                                                                                                                                                                                                                                                                                                                                                                                            |                                                                                                                                                                                                                                                                                                                                                                        |                                                                                                                     |
|-------|-----------------------|----------|-----|---------------------------------|-----------------------------------------------------------------------------------------------------------------------------------------------------------------------------|---------------------------------------------------------------------------------------------------------------------------------------------------------------------------------------------|----------------------------------------------------------------------------------------------------------------------------------------------------------------------------------------------------------------------------------------------------------------------------------------------------------------------------------------------------------------------------------------------------------------------------------------------------------------------------------------------------------------------------|------------------------------------------------------------------------------------------------------------------------------------------------------------------------------------------------------------------------------------------------------------------------------------------------------------------------------------------------------------------------|---------------------------------------------------------------------------------------------------------------------|
|       |                       |          |     |                                 | medicines:<br><br>Initially 50 mg every 12 hours, adjusted according to response; maximum 500 mg per day.                                                                   | states that the dose of opioids above which harms outweigh benefits is 120mg oral morphine equivalent/ 24hours. Doses of tapentadol above 300mg/day may increase the risk of adverse events | titrated individually to a level that provides adequate analgesia and minimises undesirable effects under the close supervision of the prescribing physician.                                                                                                                                                                                                                                                                                                                                                              | immediate release morphine (tablets or liquid), prescribed for 1-2 weeks<br>A trial using modified release preparations may take longer (3 weeks or more) to allow for dose adjustments<br><br>Long-term prescribing<br>Oral morphine is 1st choice<br>Patient should be reviewed within 4 weeks (by the initiating prescriber)<br>When stable, review every 6 months. | they should be withdrawn gradually to avoid abstinence symptoms.                                                    |
| 4.7.2 | Opioid pain medicines | Tramadol | CD3 | Moderate to severe pain         | Intramuscular injection, or by intravenous injection, or by intravenous infusion<br>Adult<br>50–100 mg every 4–6 hours, intravenous injection to be given over 2–3 minutes. |                                                                                                                                                                                             |                                                                                                                                                                                                                                                                                                                                                                                                                                                                                                                            |                                                                                                                                                                                                                                                                                                                                                                        | Avoid abrupt withdrawal after long-term treatment; they should be withdrawn gradually to avoid abstinence symptoms. |
| 4.7.2 | Opioid pain medicines | Tramadol | CD3 | Moderate to severe acute pain   | By mouth using immediate-release medicines<br>Adult<br>Initially 100 mg, then 50–100 mg every 4–6 hours; Usual maximum 400 mg/24 hours.                                     |                                                                                                                                                                                             |                                                                                                                                                                                                                                                                                                                                                                                                                                                                                                                            |                                                                                                                                                                                                                                                                                                                                                                        | Avoid abrupt withdrawal after long-term treatment; they should be withdrawn gradually to avoid abstinence symptoms. |
| 4.7.2 | Opioid pain medicines | Tramadol | CD3 | Moderate to severe chronic pain | By mouth using immediate-release medicines<br>Adult<br>Initially 50 mg, then, adjusted according to response; Usual maximum 400 mg/24 hours.                                |                                                                                                                                                                                             | The need for continued treatment should be assessed at regular intervals as withdrawal symptoms and dependence have been reported.<br><br>Tramadol should under no circumstances be administered for longer than absolutely necessary. If long-term pain treatment with tramadol is necessary in view of the nature and severity of the illness, then careful and regular monitoring should be carried out (if necessary with breaks in treatment) to establish whether and to what extent further treatment is necessary. |                                                                                                                                                                                                                                                                                                                                                                        | Avoid abrupt withdrawal after long-term treatment; they should be withdrawn gradually to avoid abstinence symptoms. |
| 4.7.2 | Opioid pain medicines | Tramadol | CD3 | Postoperative pain              | By intravenous injection                                                                                                                                                    |                                                                                                                                                                                             |                                                                                                                                                                                                                                                                                                                                                                                                                                                                                                                            |                                                                                                                                                                                                                                                                                                                                                                        | Avoid abrupt withdrawal after long-term treatment;                                                                  |

|       |                       |                      |     |                                                                        |                                                                                                                                                                                                                                                                                                                                                                                                                                                                                   |                                                                                                                                                                                                                                                                                                                                                                                                                                                                                                                                   |                                                                                                                                                                                                    |
|-------|-----------------------|----------------------|-----|------------------------------------------------------------------------|-----------------------------------------------------------------------------------------------------------------------------------------------------------------------------------------------------------------------------------------------------------------------------------------------------------------------------------------------------------------------------------------------------------------------------------------------------------------------------------|-----------------------------------------------------------------------------------------------------------------------------------------------------------------------------------------------------------------------------------------------------------------------------------------------------------------------------------------------------------------------------------------------------------------------------------------------------------------------------------------------------------------------------------|----------------------------------------------------------------------------------------------------------------------------------------------------------------------------------------------------|
| 4.7.2 | Opioid pain medicines | Tramadol             | CD3 | Moderate to severe pain (with modified-release 12-hourly preparations) | <p>Adult Initially 100 mg, then 50 mg every 10–20 minutes if required up to total maximum 250 mg (including initial dose) in first hour, then 50–100 mg every 4–6 hours, intravenous injection to be given over 2–3 minutes; maximum 600 mg per day.</p> <p>By mouth using modified-release medicines Adult 50–100 mg twice daily, increased if necessary to 150–200 mg twice daily, doses exceeding the usual maximum not generally required; Usual maximum 400 mg/24 hours.</p> | <p>The need for continued treatment should be assessed at regular intervals as withdrawal symptoms and dependence have been reported.</p> <p>Tramadol should under no circumstances be administered for longer than absolutely necessary. If long-term pain treatment with tramadol is necessary in view of the nature and severity of the illness, then careful and regular monitoring should be carried out (if necessary with breaks in treatment) to establish whether and to what extent further treatment is necessary.</p> | <p>they should be withdrawn gradually to avoid abstinence symptoms.</p> <p>Avoid abrupt withdrawal after long-term treatment; they should be withdrawn gradually to avoid abstinence symptoms.</p> |
| 4.7.2 | Opioid pain medicines | Tramadol             | CD3 | Moderate to severe pain (with modified-release 24-hourly preparations) | <p>By mouth using modified-release medicines Adult Initially 100–150 mg once daily, increased if necessary up to 400 mg once daily; Usual maximum 400 mg/24 hours.</p>                                                                                                                                                                                                                                                                                                            | <p>The need for continued treatment should be assessed at regular intervals as withdrawal symptoms and dependence have been reported.</p> <p>Tramadol should under no circumstances be administered for longer than absolutely necessary. If long-term pain treatment with tramadol is necessary in view of the nature and severity of the illness, then careful and regular monitoring should be carried out (if necessary with breaks in treatment) to establish whether and to what extent further treatment is necessary.</p> | <p>Avoid abrupt withdrawal after long-term treatment; they should be withdrawn gradually to avoid abstinence symptoms.</p>                                                                         |
| 4.7.2 | Opioid pain medicines | Tramadol (Zydol® XL) | CD3 | Moderate to severe pain                                                | <p>By mouth using modified-release tablets Adult</p>                                                                                                                                                                                                                                                                                                                                                                                                                              | <p>The need for continued treatment should be assessed at regular intervals as withdrawal</p>                                                                                                                                                                                                                                                                                                                                                                                                                                     | <p>Avoid abrupt withdrawal after long-term treatment; they should be withdrawn</p>                                                                                                                 |

|       |                       |                       |     |                                                                                 |                                                                                                                                                                                                                                                                                               |                                             |                                                                                                                                                                                     |  |                                         |
|-------|-----------------------|-----------------------|-----|---------------------------------------------------------------------------------|-----------------------------------------------------------------------------------------------------------------------------------------------------------------------------------------------------------------------------------------------------------------------------------------------|---------------------------------------------|-------------------------------------------------------------------------------------------------------------------------------------------------------------------------------------|--|-----------------------------------------|
|       |                       |                       |     |                                                                                 | Initially 150 mg once daily, increased if necessary up to 400 mg once daily.                                                                                                                                                                                                                  | symptoms and dependence have been reported. |                                                                                                                                                                                     |  | gradually to avoid abstinence symptoms. |
| 4.7.2 | Opioid pain medicines | <i>Dextromoramide</i> |     | Not in BNF                                                                      |                                                                                                                                                                                                                                                                                               |                                             |                                                                                                                                                                                     |  |                                         |
| 4.8.1 | Gabapentinoids        | Gabapentin            | POM | Adjunctive treatment of focal seizures with or without secondary generalisation | Usual dose 0.9–3.6 g daily in 3 divided doses (max. per dose 1.6 g 3 times a day)                                                                                                                                                                                                             |                                             |                                                                                                                                                                                     |  |                                         |
| 4.8.1 | Gabapentinoids        | Gabapentin            | POM | Monotherapy for focal seizures with or without secondary generalisation         | Usual dose 0.9–3.6 g daily in 3 divided doses (max. per dose 1.6 g 3 times a day)                                                                                                                                                                                                             |                                             |                                                                                                                                                                                     |  |                                         |
| 4.8.1 | Gabapentinoids        | Gabapentin            | POM | Peripheral neuropathic pain                                                     | Initially 300 mg once daily on day 1, then 300 mg twice daily on day 2, then 300 mg 3 times a day on day 3, alternatively initially 300 mg 3 times a day on day 1, then increased in steps of 300 mg every 2–3 days in 3 divided doses, adjusted according to response; maximum 3.6 g per day |                                             | After starting or changing a treatment, carry out an early clinical review of dosage titration, tolerability and adverse effects to assess the suitability of the chosen treatment. |  |                                         |
| 4.8.1 | Gabapentinoids        | Gabapentin            | POM | Migraine prophylaxis                                                            | Initially 300 mg daily, then increased to up to 2.4 g daily in divided doses, adjusted according to response                                                                                                                                                                                  |                                             | Carry out regular clinical reviews to assess and monitor the effectiveness of the treatment                                                                                         |  |                                         |
| 4.8.1 | Gabapentinoids        | Gabapentin            | POM | Menopausal symptoms,                                                            | 300 mg 3 times a day, initial dose                                                                                                                                                                                                                                                            |                                             | <a href="https://www.nice.org.uk/guidance/cg173/chapter/1-Recommendations">https://www.nice.org.uk/guidance/cg173/chapter/1-Recommendations</a>                                     |  |                                         |

|       |                |            |     |                                                                                                  |                                                                                                                                                                                                                                              |                                                                                                     |                                                                                                                                                                                                                                                                                        |                                                                                                                                                        |                                                                                                                                                                                                                                                                      |
|-------|----------------|------------|-----|--------------------------------------------------------------------------------------------------|----------------------------------------------------------------------------------------------------------------------------------------------------------------------------------------------------------------------------------------------|-----------------------------------------------------------------------------------------------------|----------------------------------------------------------------------------------------------------------------------------------------------------------------------------------------------------------------------------------------------------------------------------------------|--------------------------------------------------------------------------------------------------------------------------------------------------------|----------------------------------------------------------------------------------------------------------------------------------------------------------------------------------------------------------------------------------------------------------------------|
| 4.8.1 | Gabapentinoids | Pregabalin | POM | particularly hot flushes, in women with breast cancer<br>Peripheral and central neuropathic pain | should be lower and titrated up over three days<br>150mg to 600mg daily                                                                                                                                                                      | During dose titration the initial dose can be increased after 3-7 days, and then again after 7 days | After starting or changing a treatment, carry out an early clinical review of dosage titration, tolerability and adverse effects to assess the suitability of the chosen treatment.<br><br>Carry out regular clinical reviews to assess and monitor the effectiveness of the treatment |                                                                                                                                                        |                                                                                                                                                                                                                                                                      |
| 4.8.1 | Gabapentinoids | Pregabalin | POM | Adjunctive therapy for focal seizures with or without secondary generalisation                   | Initially 25 mg twice daily, then increased in steps of 50 mg daily, dose to be increased at 7 day intervals, increased to 300 mg daily in 2-3 divided doses for 7 days, then increased if necessary up to 600 mg daily in 2-3 divided doses | During dose titration the dose should be increased at 7 day intervals                               |                                                                                                                                                                                                                                                                                        | <a href="https://www.nice.org.uk/guidance/cg173/chapter/1-Recommendations">https://www.nice.org.uk/guidance/cg173/chapter/1-Recommendations</a><br>N/A |                                                                                                                                                                                                                                                                      |
| 4.8.1 | Gabapentinoids | Pregabalin | POM | Generalised anxiety disorder                                                                     | (150mg to 600mg daily)<br>150mg to 600mg daily                                                                                                                                                                                               | During dose titration the dose can be increased at 7 day intervals                                  | Review the effectiveness and side effects of the drug every 2-4 weeks during the first 3 months of treatment and every 3 months thereafter.<br><a href="https://www.nice.org.uk/guidance/cg113/chapter/1-Guidance">https://www.nice.org.uk/guidance/cg113/chapter/1-Guidance</a>       |                                                                                                                                                        | If the drug is effective, advise the person to continue taking it for at least a year as the likelihood of relapse is high.<br><br><a href="https://www.nice.org.uk/guidance/cg113/chapter/1-Guidance">https://www.nice.org.uk/guidance/cg113/chapter/1-Guidance</a> |

## Notes:

1. Drugs listed in Appendix A of the spec for this mapping exercise were checked against BNF 68 (sections 4.1, 4.3, 4.7 and 4.8).
2. Some drugs listed in appendix A of the spec are no longer listed in the BNF because they have been discontinued:
  - Amoxapine
  - Maprotiline
  - Protriptyline
  - Nefazodone
  - Oxitriptan
  - Dextromoramide

These are included in the Excel spreadsheet in **green font**.

3. A small number of drugs listed in these sections of the BNF did not appear in appendix A. These have been added to the spreadsheet if they seemed to fall within the scope of the review. They are marked in **red font** in the spreadsheet:
  - Lormetazepam
  - Chloral hydrate
  - Clomethiazole
  - Papaveretum
4. Index dates and recommended limits have been taken from the BNF, SPC and NICE guidance (or NICE advice if no NICE guidance exists; Clinical Knowledge Summaries). These sources often give the same information and no major contradictions were identified.
5. Doses are taken from the BNF, given as 'usual dose' if available in the BNF. If no usual dose is stated in the BNF a range is provided. For many of the opioids a dose range is not stated in the BNF- in these cases an initial dose is provided. The Opioids Aware site states that doses above 120mg/day morphine equivalent increase the risk of harm without additional benefits to patients (this same dose is referenced in the recent Cochrane review of opioids in non-cancer pain). When a drug can be used above this dose this is noted in the spreadsheet- this may help to identify potentially inappropriate long-term opioid prescribing.

**Appendix Table S2.** Medicines included in the database analysis

| <b>Drug class</b> | <b>BNF chapter</b>                    | <b>Drugs included</b>                           |
|-------------------|---------------------------------------|-------------------------------------------------|
| Antidepressants   | 4.3.1 (Tricyclics)                    | Amitriptyline (including with perphenazine)     |
|                   |                                       | Amoxapine                                       |
|                   |                                       | Clomipramine                                    |
|                   |                                       | Dosulepin                                       |
|                   |                                       | Doxepin                                         |
|                   |                                       | Imipramine                                      |
|                   |                                       | Lofepramine                                     |
|                   |                                       | Maprotiline                                     |
|                   |                                       | Mianserin                                       |
|                   |                                       | Nortriptyline                                   |
|                   |                                       | Protriptyline                                   |
|                   |                                       | Trazodone                                       |
|                   |                                       | Trimipramine                                    |
|                   | 4.3.2 (MAOIs)                         | Isocarboxazid                                   |
|                   |                                       | Moclobemide                                     |
|                   |                                       | Phenelzine                                      |
|                   |                                       | Tranylcypromine                                 |
|                   | 4.3.3 (SSRIs)                         | Citalopram                                      |
|                   |                                       | Escitalopram                                    |
|                   |                                       | Fluoxetine                                      |
|                   |                                       | Fluvoxamine                                     |
|                   |                                       | Paroxetine                                      |
|                   |                                       | Sertraline                                      |
|                   | 4.3.4 (Other antidepressants)         | Agomelatine                                     |
|                   |                                       | Duloxetine                                      |
|                   |                                       | Flupentixol                                     |
|                   |                                       | Mirtazapine                                     |
|                   |                                       | Nefazodone                                      |
| Oxatriptan        |                                       |                                                 |
| Reboxetine        |                                       |                                                 |
| Tryptophan        |                                       |                                                 |
| Venlafaxine       |                                       |                                                 |
| Vortioxetine      |                                       |                                                 |
| Opioids           |                                       | 4.7.2                                           |
|                   | Codeine*                              |                                                 |
|                   | Dextromoramide                        |                                                 |
|                   | Diamorphine                           |                                                 |
|                   | Dihydrocodeine**                      |                                                 |
|                   | Dipipanone (including with cyclizine) |                                                 |
|                   | Fentanyl                              |                                                 |
|                   | Hydromorphone                         |                                                 |
|                   | Meptazinol                            |                                                 |
|                   | Methadone                             |                                                 |
|                   | Morphine (including with cyclizine)   |                                                 |
|                   | Oxycodone (including with naloxone)   |                                                 |
|                   | Papaveretum                           |                                                 |
|                   | Pentazocine                           |                                                 |
|                   | Pethidine                             |                                                 |
|                   | Tapentadol                            |                                                 |
|                   | Tramadol (including with paracetamol) |                                                 |
|                   | 4.7.1                                 |                                                 |
|                   |                                       | Dihydrocodeine with paracetamol = co-dydramol** |
|                   |                                       | Lormetazepam                                    |
|                   |                                       | Nitrazepam                                      |
|                   |                                       | Temazepam                                       |

Cont.../



**Appendix Table S2.** Medicines included in the analysis, cont.../

| <b>Drug class</b> | <b>BNF chapter</b> | <b>Drugs included</b> |
|-------------------|--------------------|-----------------------|
| Gabapentinoids    | 4.7.3              | Gabapentin            |
|                   | 4.8.1              | Pregabalin            |
| Benzodiazepines   | 4.1.1 (insomnia)   | Flurazepam            |
|                   |                    | Loprazolam            |
|                   |                    | Lormetazepam          |
|                   |                    | Nitrazepam            |
|                   |                    | Temazepam             |
|                   | 4.1.2 (anxiety)    | Diazepam              |
|                   |                    | Chlordiazepoxide      |
|                   |                    | Lorazepam             |
|                   |                    | Oxazepam              |
| Z-drugs           | 4.1.1              | Zaleplon              |
|                   |                    | Zopiclone             |
|                   |                    | Zolpidem              |

BNF, British National Formulary version 68

\* Although they are captured within different BNF chapters, codeine and co-codamol was regarded as a single drug when considering co-prescribing within the opioid class.

\*\* Although they are captured within different BNF chapters, dihydrocodeine and co-dydramol were regarded as a single drug when considering co-prescribing within the opioid class.

## Appendix Table S3. REA search strategy

### A.1 Databases date parameters and filters used

#### A.1.1 Step 1: Existing systematic reviews

| Database                                                              | Dates searched                             | Search filter used        |
|-----------------------------------------------------------------------|--------------------------------------------|---------------------------|
| Cochrane Database of Systematic Reviews (The Cochrane Library -Wiley) | All years to Issue 9 of 12, September 2018 | None                      |
| Epistemonikos                                                         | All years to 24 September 2018             | Systematic review studies |
| Database of promoting health effectiveness reviews (DoPHER)           | All years to 19 September 2018             | None                      |
| HealthEvidence                                                        | All years to 19 September 2018             | None                      |

#### Cochrane Library (Wiley) search terms

|      |                                                                                                                                                                                                                                                                            |
|------|----------------------------------------------------------------------------------------------------------------------------------------------------------------------------------------------------------------------------------------------------------------------------|
| #1.  | MeSH descriptor: [Substance-Related Disorders] explode all trees                                                                                                                                                                                                           |
| #2.  | MeSH descriptor: [Substance Withdrawal Syndrome] explode all trees                                                                                                                                                                                                         |
| #3.  | MeSH descriptor: [Inappropriate Prescribing] explode all trees                                                                                                                                                                                                             |
| #4.  | MeSH descriptor: [Medical Overuse] explode all trees                                                                                                                                                                                                                       |
| #5.  | MeSH descriptor: [Deprescriptions] explode all trees                                                                                                                                                                                                                       |
| #6.  | (abstinen* or abstain* or cessat* or detox* or discontinu* or reduc* or stop* or taper* or withdraw* or substitut* or depend* or addict* or abuse* or abusing or chronic or long* term or longterm or short* term or short term or misus* or overus* or deprescrib*):ti,ab |
| #7.  | (over* near/3 use* or using or utilisat* or utilizat*) near/3 (prescription* or prescrib* or drug* or medicine* or medication* or pharm*):ti,ab                                                                                                                            |
| #8.  | inappropriate near/3 (prescription or prescrib*):ti,ab                                                                                                                                                                                                                     |
| #9.  | (OR #1-#8)                                                                                                                                                                                                                                                                 |
| #10. | MeSH descriptor: [Narcotics] explode all trees                                                                                                                                                                                                                             |
| #11. | MeSH descriptor: [Analgesics, Opioid] explode all trees                                                                                                                                                                                                                    |
| #12. | (analgesic* near/3 opioid* or narcotic near/3 agent*):ti,ab                                                                                                                                                                                                                |
| #13. | MeSH descriptor: [Buprenorphine] explode all trees                                                                                                                                                                                                                         |
| #14. | MeSH descriptor: [Codeine] explode all trees                                                                                                                                                                                                                               |
| #15. | MeSH descriptor: [Dextromoramide] explode all trees                                                                                                                                                                                                                        |
| #16. | MeSH descriptor: [Heroin] explode all trees                                                                                                                                                                                                                                |
| #17. | MeSH descriptor: [Fentanyl] explode all trees                                                                                                                                                                                                                              |
| #18. | MeSH descriptor: [Hydromorphone] explode all trees                                                                                                                                                                                                                         |
| #19. | MeSH descriptor: [Meptazinol] explode all trees                                                                                                                                                                                                                            |
| #20. | MeSH descriptor: [Methadone] explode all trees                                                                                                                                                                                                                             |
| #21. | MeSH descriptor: [Morphine] explode all trees                                                                                                                                                                                                                              |
| #22. | MeSH descriptor: [Oxycodone] explode all trees                                                                                                                                                                                                                             |
| #23. | MeSH descriptor: [Opium] explode all trees                                                                                                                                                                                                                                 |
| #24. | MeSH descriptor: [Pentazocine] explode all trees                                                                                                                                                                                                                           |

|      |                                                                                                                                                                                                                                                                                                                                                                                                                                                                                                              |
|------|--------------------------------------------------------------------------------------------------------------------------------------------------------------------------------------------------------------------------------------------------------------------------------------------------------------------------------------------------------------------------------------------------------------------------------------------------------------------------------------------------------------|
| #25. | MeSH descriptor: [Meperidine] explode all trees                                                                                                                                                                                                                                                                                                                                                                                                                                                              |
| #26. | MeSH descriptor: [Tramadol] explode all trees                                                                                                                                                                                                                                                                                                                                                                                                                                                                |
| #27. | (buprenorphine* or codeine* or dextromoramide* or diamorphine* or dihydrocodeine* or dipipanone* or fentanyl or hydromorphone* or meptazinol or methadone* or morphine* or oxycodone or papaveretum or pentazocine or pethidine or tapentadol or tramadol or heroin):ti,ab                                                                                                                                                                                                                                   |
| #28. | (z drug* or z hypnotic* or non-benzodiazepin* or nonbenzodiazepin* or zaleplon or zopiclone or zolpidem):ti,ab                                                                                                                                                                                                                                                                                                                                                                                               |
| #29. | (generation near/3 hypnotic*):ti,ab                                                                                                                                                                                                                                                                                                                                                                                                                                                                          |
| #30. | MeSH descriptor: [Benzodiazepines] explode all trees                                                                                                                                                                                                                                                                                                                                                                                                                                                         |
| #31. | (benzodiazepin* or bzd or flurazepam or loprazolam or lormetazepam or nitrazepam or temazepam or diazepam or chlordiazepoxide or lorazepam or oxazepam):ti,ab                                                                                                                                                                                                                                                                                                                                                |
| #32. | MeSH descriptor: [Pregabalin] explode all trees                                                                                                                                                                                                                                                                                                                                                                                                                                                              |
| #33. | (gabapentin* or pregabalin*):ti,ab                                                                                                                                                                                                                                                                                                                                                                                                                                                                           |
| #34. | MeSH descriptor: [Antidepressive Agents] explode all trees                                                                                                                                                                                                                                                                                                                                                                                                                                                   |
| #35. | (antidepress* or anti depress* or thymoanaleptic* or thymoleptic* or MAOI* or "monoamine oxidase inhibit*" or RIMA* or tricyclic* or SSRI* or SNRI* or SNORI*):ti,ab                                                                                                                                                                                                                                                                                                                                         |
| #36. | MeSH descriptor: [Amitriptyline] explode all trees                                                                                                                                                                                                                                                                                                                                                                                                                                                           |
| #37. | MeSH descriptor: [Amoxapine] explode all trees                                                                                                                                                                                                                                                                                                                                                                                                                                                               |
| #38. | MeSH descriptor: [Clomipramine] explode all trees                                                                                                                                                                                                                                                                                                                                                                                                                                                            |
| #39. | MeSH descriptor: [Dothiepin] explode all trees                                                                                                                                                                                                                                                                                                                                                                                                                                                               |
| #40. | MeSH descriptor: [Doxepin] explode all trees                                                                                                                                                                                                                                                                                                                                                                                                                                                                 |
| #41. | MeSH descriptor: [Imipramine] explode all trees                                                                                                                                                                                                                                                                                                                                                                                                                                                              |
| #42. | MeSH descriptor: [Lofepramine] explode all trees                                                                                                                                                                                                                                                                                                                                                                                                                                                             |
| #43. | MeSH descriptor: [Maprotiline] explode all trees                                                                                                                                                                                                                                                                                                                                                                                                                                                             |
| #44. | MeSH descriptor: [Mianserin] explode all trees                                                                                                                                                                                                                                                                                                                                                                                                                                                               |
| #45. | MeSH descriptor: [Nortriptyline] explode all trees                                                                                                                                                                                                                                                                                                                                                                                                                                                           |
| #46. | MeSH descriptor: [Protriptyline] explode all trees                                                                                                                                                                                                                                                                                                                                                                                                                                                           |
| #47. | MeSH descriptor: [Trazodone] explode all trees                                                                                                                                                                                                                                                                                                                                                                                                                                                               |
| #48. | MeSH descriptor: [Trimipramine] explode all trees                                                                                                                                                                                                                                                                                                                                                                                                                                                            |
| #49. | MeSH descriptor: [Isocarboxazid] explode all trees                                                                                                                                                                                                                                                                                                                                                                                                                                                           |
| #50. | MeSH descriptor: [Moclobemide] explode all trees                                                                                                                                                                                                                                                                                                                                                                                                                                                             |
| #51. | MeSH descriptor: [Phenelzine] explode all trees                                                                                                                                                                                                                                                                                                                                                                                                                                                              |
| #52. | MeSH descriptor: [Tranlycypromine] explode all trees                                                                                                                                                                                                                                                                                                                                                                                                                                                         |
| #53. | MeSH descriptor: [Citalopram] explode all trees                                                                                                                                                                                                                                                                                                                                                                                                                                                              |
| #54. | MeSH descriptor: [Fluoxetine] explode all trees                                                                                                                                                                                                                                                                                                                                                                                                                                                              |
| #55. | MeSH descriptor: [Fluvoxamine] explode all trees                                                                                                                                                                                                                                                                                                                                                                                                                                                             |
| #56. | MeSH descriptor: [Paroxetine] explode all trees                                                                                                                                                                                                                                                                                                                                                                                                                                                              |
| #57. | MeSH descriptor: [Sertraline] explode all trees                                                                                                                                                                                                                                                                                                                                                                                                                                                              |
| #58. | MeSH descriptor: [5-Hydroxytryptophan] explode all trees                                                                                                                                                                                                                                                                                                                                                                                                                                                     |
| #59. | MeSH descriptor: [Duloxetine Hydrochloride] explode all trees                                                                                                                                                                                                                                                                                                                                                                                                                                                |
| #60. | MeSH descriptor: [Flupenthixol] explode all trees                                                                                                                                                                                                                                                                                                                                                                                                                                                            |
| #61. | MeSH descriptor: [Tryptophan] explode all trees                                                                                                                                                                                                                                                                                                                                                                                                                                                              |
| #62. | MeSH descriptor: [Venlafaxine Hydrochloride] explode all trees                                                                                                                                                                                                                                                                                                                                                                                                                                               |
| #63. | (amitriptyline or amoxapine or clomipramine or dosulepin or doxepin or imipramine or lofepramine or maprotiline or mianserin or nortriptyline or protriptyline or trazodone or trimipramine or isocarboxazid or moclobemide or phenelzine or tranlycypromine or citalopram or escitalopram or fluoxetine or fluvoxamine or paroxetine or sertraline or agomelatine or duloxetine or flupentixol or mirtazapine or nefazodone or oxitriptan or reboxetine or tryptophan or venlafaxine or vortioxetine):ti,ab |
| #64. | (OR #10-#63)                                                                                                                                                                                                                                                                                                                                                                                                                                                                                                 |

|      |            |
|------|------------|
| #65. | #9 and #64 |
|------|------------|

### Epistemonikos search terms

|    |                                                                                                                                                                                                                                                                                                                                                                                                                                                                                                                                                                                                                                                                                                                                                                                                                                                                                                                                                                                                                                                                                                                                                                                                                                                                                                                                                                                                                                                                                                                                                                                                                                                                                                                                                                                                                                                                                                                                                                                                                                                                                                                                                                                                                                                                                                                                                                                                                                                                                                                                                                                                                                                                                                                                                                                                  |
|----|--------------------------------------------------------------------------------------------------------------------------------------------------------------------------------------------------------------------------------------------------------------------------------------------------------------------------------------------------------------------------------------------------------------------------------------------------------------------------------------------------------------------------------------------------------------------------------------------------------------------------------------------------------------------------------------------------------------------------------------------------------------------------------------------------------------------------------------------------------------------------------------------------------------------------------------------------------------------------------------------------------------------------------------------------------------------------------------------------------------------------------------------------------------------------------------------------------------------------------------------------------------------------------------------------------------------------------------------------------------------------------------------------------------------------------------------------------------------------------------------------------------------------------------------------------------------------------------------------------------------------------------------------------------------------------------------------------------------------------------------------------------------------------------------------------------------------------------------------------------------------------------------------------------------------------------------------------------------------------------------------------------------------------------------------------------------------------------------------------------------------------------------------------------------------------------------------------------------------------------------------------------------------------------------------------------------------------------------------------------------------------------------------------------------------------------------------------------------------------------------------------------------------------------------------------------------------------------------------------------------------------------------------------------------------------------------------------------------------------------------------------------------------------------------------|
| 1. | "substance-related disorders" OR "substance withdrawal syndrome" OR "inappropriate prescribing" OR "medical overuse" OR "deprescriptions" OR "abstinen*" OR "abstain*" OR "cessat*" OR "detox*" OR "discontin*" OR "reduc*" OR "stop*" OR "taper*" OR "withdraw*" OR "substitut*" OR "depend*" OR "addict*" OR "abuse*" OR "abusing" OR "chronic" OR "long* term" OR "longterm" OR "short* term" OR "short term" OR "misus*" OR "overus*" OR "deprescrib*" OR "inappropriate prescription"                                                                                                                                                                                                                                                                                                                                                                                                                                                                                                                                                                                                                                                                                                                                                                                                                                                                                                                                                                                                                                                                                                                                                                                                                                                                                                                                                                                                                                                                                                                                                                                                                                                                                                                                                                                                                                                                                                                                                                                                                                                                                                                                                                                                                                                                                                       |
| 2. | "buprenorphine*" OR "codeine*" OR "dextromoramide*" OR "diamorphine*" OR "dihydrocodeine*" OR "dipipanone*" OR "fentanyl" OR "hydromorphone*" OR "meptazinol" OR "methadone*" OR "morphine*" OR "oxycodone" OR "papaveretum" OR "pentazocine" OR "pethidine" OR "tapentadol" OR "tramadol" OR "heroin" OR "z drug*" OR "z hypnotic*" OR "non-benzodiazepin*" OR "nonbenzodiazepin*" OR "zaleplon" OR "zopiclone" OR "zolpidem" OR "generation hypnotic" OR "benzodiazepin*" OR "bzd" OR "flurazepam" OR "lorazepam" OR "lormetazepam" OR "nitrazepam" OR "temazepam" OR "diazepam" OR "chlordiazepoxide" OR "lorazepam" OR "oxazepam" OR "gabapentin*" OR "pregabalin*" OR "antidepress*" OR "anti depress*" OR "thymoanaleptic*" OR "thymoleptic*" OR "MAOI*" OR "monoamine oxidase inhibit*" OR "RIMA*" OR "tricyclic*" OR "SSRI*" OR "SNRI*" OR "SNORI*" OR "amitriptyline" OR "amoxapine" OR "clomipramine" OR "dosulepin" OR "doxepin" OR "imipramine" OR "lofepramine" OR "maprotiline" OR "mianserin" OR "nortriptyline" OR "protriptyline" OR "trazodone" OR "trimipramine" OR "isocarboxazid" OR "moclobemide" OR "phenelzine" OR "tranylcypromine" OR "citalopram" OR "escitalopram" OR "fluoxetine" OR "fluvoxamine" OR "paroxetine" OR "sertraline" OR "agomelatine" OR "duloxetine" OR "flupentixol" OR "mirtazapine" OR "nefazodone" OR "oxitriptan" OR "reboxetine" OR "tryptophan" OR "venlafaxine" OR "vortioxetine"                                                                                                                                                                                                                                                                                                                                                                                                                                                                                                                                                                                                                                                                                                                                                                                                                                                                                                                                                                                                                                                                                                                                                                                                                                                                                                                                                            |
| 3. | (title:( "substance-related disorders" OR "substance withdrawal syndrome" OR "inappropriate prescribing" OR "medical overuse" OR "deprescriptions" OR "abstinen*" OR "abstain*" OR "cessat*" OR "detox*" OR "discontin*" OR "reduc*" OR "stop*" OR "taper*" OR "withdraw*" OR "substitut*" OR "depend*" OR "addict*" OR "abuse*" OR "abusing" OR "chronic" OR "long* term" OR "longterm" OR "short* term" OR "short term" OR "misus*" OR "overus*" OR "deprescrib*" OR "inappropriate prescription")) OR abstract:( "substance-related disorders" OR "substance withdrawal syndrome" OR "inappropriate prescribing" OR "medical overuse" OR "deprescriptions" OR "abstinen*" OR "abstain*" OR "cessat*" OR "detox*" OR "discontin*" OR "reduc*" OR "stop*" OR "taper*" OR "withdraw*" OR "substitut*" OR "depend*" OR "addict*" OR "abuse*" OR "abusing" OR "chronic" OR "long* term" OR "longterm" OR "short* term" OR "short term" OR "misus*" OR "overus*" OR "deprescrib*" OR "inappropriate prescription")) AND (title:( "buprenorphine*" OR "codeine*" OR "dextromoramide*" OR "diamorphine*" OR "dihydrocodeine*" OR "dipipanone*" OR "fentanyl" OR "hydromorphone*" OR "meptazinol" OR "methadone*" OR "morphine*" OR "oxycodone" OR "papaveretum" OR "pentazocine" OR "pethidine" OR "tapentadol" OR "tramadol" OR "heroin" OR "z drug*" OR "z hypnotic*" OR "non-benzodiazepin*" OR "nonbenzodiazepin*" OR "zaleplon" OR "zopiclone" OR "zolpidem" OR "generation hypnotic" OR "benzodiazepin*" OR "bzd" OR "flurazepam" OR "lorazepam" OR "lormetazepam" OR "nitrazepam" OR "temazepam" OR "diazepam" OR "chlordiazepoxide" OR "lorazepam" OR "oxazepam" OR "gabapentin*" OR "pregabalin*" OR "antidepress*" OR "anti depress*" OR "thymoanaleptic*" OR "thymoleptic*" OR "MAOI*" OR "monoamine oxidase inhibit*" OR "RIMA*" OR "tricyclic*" OR "SSRI*" OR "SNRI*" OR "SNORI*" OR "amitriptyline" OR "amoxapine" OR "clomipramine" OR "dosulepin" OR "doxepin" OR "imipramine" OR "lofepramine" OR "maprotiline" OR "mianserin" OR "nortriptyline" OR "protriptyline" OR "trazodone" OR "trimipramine" OR "isocarboxazid" OR "moclobemide" OR "phenelzine" OR "tranylcypromine" OR "citalopram" OR "escitalopram" OR "fluoxetine" OR "fluvoxamine" OR "paroxetine" OR "sertraline" OR "agomelatine" OR "duloxetine" OR "flupentixol" OR "mirtazapine" OR "nefazodone" OR "oxitriptan" OR "reboxetine" OR "tryptophan" OR "venlafaxine" OR "vortioxetine")) OR abstract:( "buprenorphine*" OR "codeine*" OR "dextromoramide*" OR "diamorphine*" OR "dihydrocodeine*" OR "dipipanone*" OR "fentanyl" OR "hydromorphone*" OR "meptazinol" OR "methadone*" OR "morphine*" OR "oxycodone" OR "papaveretum" OR "pentazocine" OR "pethidine" OR "tapentadol" OR "tramadol" OR "heroin" OR "z |

|    |                                                                                                                                                                                                                                                                                                                                                                                                                                                                                                                                                                                                                                                                                                                                                                                                                                                                                                                                                                                                                                                                                                                             |
|----|-----------------------------------------------------------------------------------------------------------------------------------------------------------------------------------------------------------------------------------------------------------------------------------------------------------------------------------------------------------------------------------------------------------------------------------------------------------------------------------------------------------------------------------------------------------------------------------------------------------------------------------------------------------------------------------------------------------------------------------------------------------------------------------------------------------------------------------------------------------------------------------------------------------------------------------------------------------------------------------------------------------------------------------------------------------------------------------------------------------------------------|
|    | drug*" OR "z hypnotic*" OR "non-benzodiazepin*" OR "nonbenzodiazepin*" OR "zaleplon" OR "zopiclone" OR "zolpidem" OR "generation hypnotic" OR "benzodiazepin*" OR "bzd" OR "flurazepam" OR "loprazolam" OR "lormetazepam" OR "nitrazepam" OR "temazepam" OR "diazepam" OR "chlordiazepoxide" OR "lorazepam" OR "oxazepam" OR "gabapentin*" OR "pregabalin*" OR "antidepress*" OR "anti depress*" OR "thymoanaleptic*" OR "thymoleptic*" OR "MAOI*" OR "monoamine oxidase inhibit*" OR "RIMA*" OR "tricyclic*" OR "SSRI*" OR "SNRI*" OR "SNORI*" OR "amitriptyline" OR "amoxapine" OR "clomipramine" OR "dosulepin" OR "doxepin" OR "imipramine" OR "lofepramine" OR "maprotiline" OR "mianserin" OR "nortriptyline" OR "protriptyline" OR "trazodone" OR "trimipramine" OR "isocarboxazid" OR "moclobemide" OR "phenelzine" OR "tranylcypromine" OR "citalopram" OR "escitalopram" OR "fluoxetine" OR "fluvoxamine" OR "paroxetine" OR "sertraline" OR "agomelatine" OR "duloxetine" OR "flupentixol" OR "mirtazapine" OR "nefazodone" OR "oxitriptan" OR "reboxetine" OR "tryptophan" OR "venlafaxine" OR "vortioxetine")) |
| 4. | Limit 3 to systematic reviews                                                                                                                                                                                                                                                                                                                                                                                                                                                                                                                                                                                                                                                                                                                                                                                                                                                                                                                                                                                                                                                                                               |

### Database of promoting health effectiveness reviews (DoPHER) search terms

|     |                                                                                                                                                                                                                                                                                                                                                                                                                                                                                                                                                                                                    |
|-----|----------------------------------------------------------------------------------------------------------------------------------------------------------------------------------------------------------------------------------------------------------------------------------------------------------------------------------------------------------------------------------------------------------------------------------------------------------------------------------------------------------------------------------------------------------------------------------------------------|
| 1.  | Freetext (All but Authors): "substance-related disorders" OR "substance withdrawal syndrome" OR "inappropriate prescribing" OR "medical overuse" OR "deprescriptions" OR "abstinen*" or "abstain*" or "cessat*" or "detox*" or "discontin*" or "reduc*" or "stop*" or "taper*" or "withdraw*" or "substitut*" or "depend*" or "addict*" or "abuse*" or "abusing" or "chronic" or "long* term" or "longterm" or "short* term" or "short term" or "misus*" or "overus*" OR "deprescrib*"                                                                                                             |
| 2.  | Freetext (All but Authors): "over*" near "use*" near "prescri*"                                                                                                                                                                                                                                                                                                                                                                                                                                                                                                                                    |
| 3.  | Freetext (All but Authors): "inappropriate" near "prescri*"                                                                                                                                                                                                                                                                                                                                                                                                                                                                                                                                        |
| 4.  | 1 or 2 or 3                                                                                                                                                                                                                                                                                                                                                                                                                                                                                                                                                                                        |
| 5.  | Freetext (All but Authors): "buprenorphine*" or "codeine*" or "dextromoramide*" or "diamorphine*" or "dihydrocodeine*" or "dipipanone*" or "fentanyl" or "hydromorphone*" or "meptazinol" or "methadone*" or "morphine*" or "oxycodone" or "papaveretum" or "pentazocine" or "pethidine" or "tapentadol" or "tramadol" or "heroin"                                                                                                                                                                                                                                                                 |
| 6.  | Freetext (All but Authors): "z drug*" or "z hypnotic*" or "non-benzodiazepin*" or "nonbenzodiazepin*" or "zaleplon" or "zopiclone" or "zolpidem"                                                                                                                                                                                                                                                                                                                                                                                                                                                   |
| 7.  | Freetext (All but Authors): "generation" near "hypnotic"                                                                                                                                                                                                                                                                                                                                                                                                                                                                                                                                           |
| 8.  | Freetext (All but Authors): "benzodiazepin*" or "bzd" or "flurazepam" or "loprazolam" or "lormetazepam" or "nitrazepam" or "temazepam" or "diazepam" or "chlordiazepoxide" or "lorazepam" or "oxazepam"                                                                                                                                                                                                                                                                                                                                                                                            |
| 9.  | Freetext (All but Authors): "gabapentin*" or "pregabalin*"                                                                                                                                                                                                                                                                                                                                                                                                                                                                                                                                         |
| 10. | Freetext (All but Authors): "antidepress*" or "anti depress*" or "thymoanaleptic*" or "thymoleptic*" or "MAOI*" or "monoamine oxidase inhibit*" or "RIMA*" or "tricyclic*" or "SSRI*" or "SNRI*" or "SNORI*"                                                                                                                                                                                                                                                                                                                                                                                       |
| 11. | Freetext (All but Authors): "amitriptyline" or "amoxapine" or "clomipramine" or "dosulepin" or "doxepin" or "imipramine" or "lofepramine" or "maprotiline" or "mianserin" or "nortriptyline" or "protriptyline" or "trazodone" or "trimipramine" or "isocarboxazid" or "moclobemide" or "phenelzine" or "tranylcypromine" or "citalopram" or "escitalopram" or "fluoxetine" or "fluvoxamine" or "paroxetine" or "sertraline" or "agomelatine" or "duloxetine" or "flupentixol" or "mirtazapine" or "nefazodone" or "oxitriptan" or "reboxetine" or "tryptophan" or "venlafaxine" or "vortioxetine" |
| 12. | 5 OR 6 OR 7 OR 8 OR 9 OR 10 OR 11                                                                                                                                                                                                                                                                                                                                                                                                                                                                                                                                                                  |
| 13. | 4 AND 12                                                                                                                                                                                                                                                                                                                                                                                                                                                                                                                                                                                           |

### HealthEvidence search terms

|    |                                                                                                                                                                                                                                                                                                                                                   |
|----|---------------------------------------------------------------------------------------------------------------------------------------------------------------------------------------------------------------------------------------------------------------------------------------------------------------------------------------------------|
| 1. | [((substance-related disorders or substance withdrawal syndrome or inappropriate prescribing OR medical overuse OR deprescriptions or abstinen* or abstain* or cessat* or detox* or discontinu* or reduc* or stop* or taper* or withdraw* or substitut* or depend* or addict* or abuse* or abusing or chronic or long* term or longterm or short* |
|----|---------------------------------------------------------------------------------------------------------------------------------------------------------------------------------------------------------------------------------------------------------------------------------------------------------------------------------------------------|

|  |                                                                                                                                                                                                                                                                                                                                                                                                                                                                                                                                                                                                                                                                                                                                                                                                                                                                                                                                                                                                                                                                                                                                                                                                                                                                                                                                         |
|--|-----------------------------------------------------------------------------------------------------------------------------------------------------------------------------------------------------------------------------------------------------------------------------------------------------------------------------------------------------------------------------------------------------------------------------------------------------------------------------------------------------------------------------------------------------------------------------------------------------------------------------------------------------------------------------------------------------------------------------------------------------------------------------------------------------------------------------------------------------------------------------------------------------------------------------------------------------------------------------------------------------------------------------------------------------------------------------------------------------------------------------------------------------------------------------------------------------------------------------------------------------------------------------------------------------------------------------------------|
|  | term or short term or misus* or overus* or deprescrib*) AND ((narcotics or analgesics or buprenorphine* or codeine* or dextromoramide* or diamorphine* or dihydrocodeine* or dipipanone* or fentanyl or hydromorphone* or meptazinol or methadone* or morphine* or oxycodone or papaveretum or pentazocine or pethidine or tapentadol or tramadol or heroin or z drug* or z hypnotic* or non-benzodiazepin* or nonbenzodiazepin* or zaleplon or zopiclone or zolpidem or benzodiazepin* or bzd or flurazepam or loprozalam or lormetazepam or nitrazepam or temazepam or diazepam or chlordiazepoxide or lorazepam or oxazepam or gabapentin* or pregabalin* or antidepress* or anti depress* or thymoanaleptic* or thymoleptic* or MAOI* or "monoamine oxidase inhibit*" or RIMA* or tricyclic* or SSRI* or SNRI* or SNORI* or amitriptyline or amoxapine or clomipramine or dosulepin or doxepin or imipramine or lofepramine or maprotiline or mianserin or nortriptyline or protriptyline or trazodone or trimipramine or isocarboxazid or moclobemide or phenelzine or tranylcypromine or citalopram or escitalopram or fluoxetine or fluvoxamine or paroxetine or sertraline or agomelatine or duloxetine or flupentixol or mirtazapine or nefazodone or oxitriptan or reboxetine or tryptophan or venlafaxine or vortioxetine))] |
|--|-----------------------------------------------------------------------------------------------------------------------------------------------------------------------------------------------------------------------------------------------------------------------------------------------------------------------------------------------------------------------------------------------------------------------------------------------------------------------------------------------------------------------------------------------------------------------------------------------------------------------------------------------------------------------------------------------------------------------------------------------------------------------------------------------------------------------------------------------------------------------------------------------------------------------------------------------------------------------------------------------------------------------------------------------------------------------------------------------------------------------------------------------------------------------------------------------------------------------------------------------------------------------------------------------------------------------------------------|

### A.1.2 Step 2: Recent evidence

| Database                                                                               | Dates searched                                             | Search filter used                                                      |
|----------------------------------------------------------------------------------------|------------------------------------------------------------|-------------------------------------------------------------------------|
| Medline (OVID)                                                                         | 1 <sup>st</sup> January 2008 – 3 October 2018              | Exclusions<br>Randomised controlled trials<br>Systematic review studies |
| Embase (OVID)                                                                          | 1 <sup>st</sup> January 2008 – 3 October 2018              | Exclusions<br>Randomised controlled trials<br>Systematic review studies |
| Cochrane Central Register of Controlled Trials (CENTRAL) (The Cochrane Library -Wiley) | 1 <sup>st</sup> January 2008 to Issue 8 of 12, August 2018 | None                                                                    |
| PsycINFO (ProQuest)                                                                    | 1 <sup>st</sup> January 2008 – 3 October 2018              | Exclusions<br>Randomised controlled trials<br>Systematic review studies |
| Health Technology Appraisals (Centre for Reviews and Dissemination)                    | 1 <sup>st</sup> January 2008 – 3 October 2018              | None                                                                    |
| Trials Register of Promoting Health Interventions (TRoPHI)                             | All years to 3 October 2018                                | None                                                                    |
| ASSIA (Proquest)                                                                       | 1 <sup>st</sup> January 2008 – 3 October 2018              | None                                                                    |

### Medline (Ovid) search terms

|    |                                    |
|----|------------------------------------|
| 1. | exp substance-related disorders/   |
| 2. | exp substance withdrawal syndrome/ |
| 3. | exp inappropriate prescribing/     |
| 4. | exp medical overuse/               |
| 5. | exp deprescriptions/               |

|     |                                                                                                                                                                                                                                                                             |
|-----|-----------------------------------------------------------------------------------------------------------------------------------------------------------------------------------------------------------------------------------------------------------------------------|
| 6.  | (abstinen* or abstain* or cessat* or detox* or discontinu* or reduc* or stop* or taper* or withdraw* or substitut* or depend* or addict* or abuse* or abusing or chronic or long* term or longterm or short* term or short term or misus* or overus* or deprescrib*).ti,ab. |
| 7.  | (over* adj3 (use* or using or utilisat* or utilizat*) adj3 (prescription* or prescrib* or drug* or medicine* or medication* or pharm*)).ti,ab.                                                                                                                              |
| 8.  | (inappropriate adj3 (prescription or prescrib*)).ti,ab.                                                                                                                                                                                                                     |
| 9.  | or/1-8                                                                                                                                                                                                                                                                      |
| 10. | letter/                                                                                                                                                                                                                                                                     |
| 11. | editorial/                                                                                                                                                                                                                                                                  |
| 12. | news/                                                                                                                                                                                                                                                                       |
| 13. | exp historical article/                                                                                                                                                                                                                                                     |
| 14. | anecdotes as topic/                                                                                                                                                                                                                                                         |
| 15. | comment/                                                                                                                                                                                                                                                                    |
| 16. | case report/                                                                                                                                                                                                                                                                |
| 17. | (letter or comment*).ti.                                                                                                                                                                                                                                                    |
| 18. | or/10-17                                                                                                                                                                                                                                                                    |
| 19. | randomized controlled trial/ or random*.ti,ab.                                                                                                                                                                                                                              |
| 20. | 18 not 19                                                                                                                                                                                                                                                                   |
| 21. | animals/ not humans/                                                                                                                                                                                                                                                        |
| 22. | exp animals, laboratory/                                                                                                                                                                                                                                                    |
| 23. | exp animal experimentation/                                                                                                                                                                                                                                                 |
| 24. | exp models, animal/                                                                                                                                                                                                                                                         |
| 25. | exp rodentia/                                                                                                                                                                                                                                                               |
| 26. | (rat or rats or mouse or mice).ti.                                                                                                                                                                                                                                          |
| 27. | or/20-26                                                                                                                                                                                                                                                                    |
| 28. | 9 not 27                                                                                                                                                                                                                                                                    |
| 29. | limit 28 to English language                                                                                                                                                                                                                                                |
| 30. | exp narcotics/                                                                                                                                                                                                                                                              |
| 31. | exp analgesics, opioid/                                                                                                                                                                                                                                                     |
| 32. | (analgesic* adj3 (opioid* or narcotic) adj3 agent*).ti,ab.                                                                                                                                                                                                                  |
| 33. | exp buprenorphine/                                                                                                                                                                                                                                                          |
| 34. | exp codeine/                                                                                                                                                                                                                                                                |
| 35. | exp dextromoramide/                                                                                                                                                                                                                                                         |
| 36. | exp heroin/                                                                                                                                                                                                                                                                 |
| 37. | exp fentanyl/                                                                                                                                                                                                                                                               |
| 38. | exp hydromorphone/                                                                                                                                                                                                                                                          |
| 39. | exp meptazinol/                                                                                                                                                                                                                                                             |
| 40. | exp methadone/                                                                                                                                                                                                                                                              |
| 41. | exp morphine/                                                                                                                                                                                                                                                               |
| 42. | exp oxycodone/                                                                                                                                                                                                                                                              |
| 43. | exp opium/                                                                                                                                                                                                                                                                  |
| 44. | exp pentazocine/                                                                                                                                                                                                                                                            |
| 45. | exp meperidine/                                                                                                                                                                                                                                                             |
| 46. | exp tramadol/                                                                                                                                                                                                                                                               |
| 47. | (buprenorphine* or codeine* or dextromoramide* or diamorphine* or dihydrocodeine* or dipipanone* or fentanyl or hydromorphone* or meptazinol or methadone* or morphine* or oxycodone or papaveretum or pentazocine or pethidine or tapentadol or tramadol or heroin).ti,ab. |
| 48. | (z drug* or z hypnotic* or non-benzodiazepin* or nonbenzodiazepin* or zaleplon or zopiclone or zolpidem).ti,ab.                                                                                                                                                             |

|     |                                                                                                                                                                                                                                                                                                                                                                                                                                                                                                               |
|-----|---------------------------------------------------------------------------------------------------------------------------------------------------------------------------------------------------------------------------------------------------------------------------------------------------------------------------------------------------------------------------------------------------------------------------------------------------------------------------------------------------------------|
| 49. | (generation adj3 hypnotic*).ti,ab.                                                                                                                                                                                                                                                                                                                                                                                                                                                                            |
| 50. | exp benzodiazepines/                                                                                                                                                                                                                                                                                                                                                                                                                                                                                          |
| 51. | (benzodiazepin* or bzd or flurazepam or loprazolam or lormetazepam or nitrazepam or temazepam or diazepam or chlordiazepoxide or lorazepam or oxazepam).ti,ab.                                                                                                                                                                                                                                                                                                                                                |
| 52. | exp pregabalin/                                                                                                                                                                                                                                                                                                                                                                                                                                                                                               |
| 53. | (gabapentin* or pregabalin*).ti,ab.                                                                                                                                                                                                                                                                                                                                                                                                                                                                           |
| 54. | exp antidepressive agents/                                                                                                                                                                                                                                                                                                                                                                                                                                                                                    |
| 55. | (antidepress* or anti depress* or thymoanaleptic* or thymoleptic* or maoi* or "monoamine oxidase inhibit*" or rima* or tricyclic* or ssri* or snri* or snori*).ti,ab.                                                                                                                                                                                                                                                                                                                                         |
| 56. | exp amitriptyline/                                                                                                                                                                                                                                                                                                                                                                                                                                                                                            |
| 57. | exp amoxapine/                                                                                                                                                                                                                                                                                                                                                                                                                                                                                                |
| 58. | exp clomipramine/                                                                                                                                                                                                                                                                                                                                                                                                                                                                                             |
| 59. | exp dothiepin/                                                                                                                                                                                                                                                                                                                                                                                                                                                                                                |
| 60. | exp doxepin/                                                                                                                                                                                                                                                                                                                                                                                                                                                                                                  |
| 61. | exp imipramine/                                                                                                                                                                                                                                                                                                                                                                                                                                                                                               |
| 62. | exp lofepramine/                                                                                                                                                                                                                                                                                                                                                                                                                                                                                              |
| 63. | exp maprotiline/                                                                                                                                                                                                                                                                                                                                                                                                                                                                                              |
| 64. | exp mianserin/                                                                                                                                                                                                                                                                                                                                                                                                                                                                                                |
| 65. | exp nortriptyline/                                                                                                                                                                                                                                                                                                                                                                                                                                                                                            |
| 66. | exp protriptyline/                                                                                                                                                                                                                                                                                                                                                                                                                                                                                            |
| 67. | exp trazodone/                                                                                                                                                                                                                                                                                                                                                                                                                                                                                                |
| 68. | exp trimipramine/                                                                                                                                                                                                                                                                                                                                                                                                                                                                                             |
| 69. | exp isocarboxazid/                                                                                                                                                                                                                                                                                                                                                                                                                                                                                            |
| 70. | exp moclobemide/                                                                                                                                                                                                                                                                                                                                                                                                                                                                                              |
| 71. | exp phenelzine/                                                                                                                                                                                                                                                                                                                                                                                                                                                                                               |
| 72. | exp tranylcypromine/                                                                                                                                                                                                                                                                                                                                                                                                                                                                                          |
| 73. | exp citalopram/                                                                                                                                                                                                                                                                                                                                                                                                                                                                                               |
| 74. | exp fluoxetine/                                                                                                                                                                                                                                                                                                                                                                                                                                                                                               |
| 75. | exp fluvoxamine/                                                                                                                                                                                                                                                                                                                                                                                                                                                                                              |
| 76. | exp paroxetine/                                                                                                                                                                                                                                                                                                                                                                                                                                                                                               |
| 77. | exp sertraline/                                                                                                                                                                                                                                                                                                                                                                                                                                                                                               |
| 78. | exp 5-hydroxytryptophan/                                                                                                                                                                                                                                                                                                                                                                                                                                                                                      |
| 79. | exp duloxetine hydrochloride/                                                                                                                                                                                                                                                                                                                                                                                                                                                                                 |
| 80. | exp flupenthixol/                                                                                                                                                                                                                                                                                                                                                                                                                                                                                             |
| 81. | exp tryptophan/                                                                                                                                                                                                                                                                                                                                                                                                                                                                                               |
| 82. | exp venlafaxine hydrochloride/                                                                                                                                                                                                                                                                                                                                                                                                                                                                                |
| 83. | (amitriptyline or amoxapine or clomipramine or dosulepin or doxepin or imipramine or lofepramine or maprotiline or mianserin or nortriptyline or protriptyline or trazodone or trimipramine or isocarboxazid or moclobemide or phenelzine or tranylcypromine or citalopram or escitalopram or fluoxetine or fluvoxamine or paroxetine or sertraline or agomelatine or duloxetine or flupentixol or mirtazapine or nefazodone or oxitriptan or reboxetine or tryptophan or venlafaxine or vortioxetine).ti,ab. |
| 84. | or/30-83                                                                                                                                                                                                                                                                                                                                                                                                                                                                                                      |
| 85. | 29 and 84                                                                                                                                                                                                                                                                                                                                                                                                                                                                                                     |
| 86. | randomized controlled trial.pt.                                                                                                                                                                                                                                                                                                                                                                                                                                                                               |
| 87. | controlled clinical trial.pt.                                                                                                                                                                                                                                                                                                                                                                                                                                                                                 |
| 88. | randomi#ed.ab.                                                                                                                                                                                                                                                                                                                                                                                                                                                                                                |
| 89. | placebo.ab.                                                                                                                                                                                                                                                                                                                                                                                                                                                                                                   |
| 90. | randomly.ab.                                                                                                                                                                                                                                                                                                                                                                                                                                                                                                  |
| 91. | clinical trials as topic.sh.                                                                                                                                                                                                                                                                                                                                                                                                                                                                                  |



|      |                                                                                                                                                        |
|------|--------------------------------------------------------------------------------------------------------------------------------------------------------|
| 92.  | trial.ti.                                                                                                                                              |
| 93.  | or/86-92                                                                                                                                               |
| 94.  | meta-analysis/                                                                                                                                         |
| 95.  | meta-analysis as topic/                                                                                                                                |
| 96.  | (meta analy* or metanaly* or metaanaly* or meta regression).ti,ab.                                                                                     |
| 97.  | ((systematic* or evidence*) adj2 (review* or overview*)).ti,ab.                                                                                        |
| 98.  | (reference list* or bibliograph* or hand search* or manual search* or relevant journals).ab.                                                           |
| 99.  | (search strategy or search criteria or systematic search or study selection or data extraction).ab.                                                    |
| 100. | (search* adj4 literature).ab.                                                                                                                          |
| 101. | (medline or pubmed or cochrane or embase or psychlit or psyclit or psychinfo or psycinfo or cinahl or science citation index or bids or cancerlit).ab. |
| 102. | cochrane.jw.                                                                                                                                           |
| 103. | ((multiple treatment* or indirect or mixed) adj2 comparison*).ti,ab.                                                                                   |
| 104. | or/94-103                                                                                                                                              |
| 105. | 85 and (93 or 104)                                                                                                                                     |

### Embase (Ovid) search terms

|     |                                                                                                                                                                                                                                                                             |
|-----|-----------------------------------------------------------------------------------------------------------------------------------------------------------------------------------------------------------------------------------------------------------------------------|
| 1.  | *drug dependence/                                                                                                                                                                                                                                                           |
| 2.  | *withdrawal syndrome/ or *alcohol withdrawal syndrome/ or *neonatal abstinence syndrome/                                                                                                                                                                                    |
| 3.  | *inappropriate prescribing/                                                                                                                                                                                                                                                 |
| 4.  | *deprescription/                                                                                                                                                                                                                                                            |
| 5.  | (abstinen* or abstain* or cessat* or detox* or discontinu* or reduc* or stop* or taper* or withdraw* or substitut* or depend* or addict* or abuse* or abusing or chronic or long* term or longterm or short* term or short term or misus* or overus* or deprescrib*).ti,ab. |
| 6.  | (over* adj3 (use* or using or utilisat* or utilizat*) adj3 (prescription* or prescrib* or drug* or medicine* or medication* or pharm*)).ti,ab.                                                                                                                              |
| 7.  | (inappropriate adj3 (prescription or prescrib*)).ti,ab.                                                                                                                                                                                                                     |
| 8.  | or/1-7                                                                                                                                                                                                                                                                      |
| 9.  | letter.pt. or letter/                                                                                                                                                                                                                                                       |
| 10. | note.pt.                                                                                                                                                                                                                                                                    |
| 11. | editorial.pt.                                                                                                                                                                                                                                                               |
| 12. | case report/ or case study/                                                                                                                                                                                                                                                 |
| 13. | (letter or comment*).ti.                                                                                                                                                                                                                                                    |
| 14. | or/9-13                                                                                                                                                                                                                                                                     |
| 15. | randomized controlled trial/ or random*.ti,ab.                                                                                                                                                                                                                              |
| 16. | 14 not 15                                                                                                                                                                                                                                                                   |
| 17. | animal/ not human/                                                                                                                                                                                                                                                          |
| 18. | nonhuman/                                                                                                                                                                                                                                                                   |
| 19. | exp Animal Experiment/                                                                                                                                                                                                                                                      |
| 20. | exp Experimental Animal/                                                                                                                                                                                                                                                    |
| 21. | animal model/                                                                                                                                                                                                                                                               |
| 22. | exp Rodent/                                                                                                                                                                                                                                                                 |
| 23. | (rat or rats or mouse or mice).ti.                                                                                                                                                                                                                                          |
| 24. | or/16-23                                                                                                                                                                                                                                                                    |
| 25. | 8 not 24                                                                                                                                                                                                                                                                    |
| 26. | limit 25 to English language                                                                                                                                                                                                                                                |

|     |                                                                                                                                                                                                                                                                             |
|-----|-----------------------------------------------------------------------------------------------------------------------------------------------------------------------------------------------------------------------------------------------------------------------------|
| 27. | *narcotic agent/                                                                                                                                                                                                                                                            |
| 28. | *narcotic analgesic agent/                                                                                                                                                                                                                                                  |
| 29. | (analgesic* adj3 (opioid* or narcotic) adj3 agent*).ti,ab.                                                                                                                                                                                                                  |
| 30. | *buprenorphine/                                                                                                                                                                                                                                                             |
| 31. | *codeine/                                                                                                                                                                                                                                                                   |
| 32. | *dextromoramide/                                                                                                                                                                                                                                                            |
| 33. | *diamorphine/                                                                                                                                                                                                                                                               |
| 34. | *fentanyl/                                                                                                                                                                                                                                                                  |
| 35. | *hydromorphone/                                                                                                                                                                                                                                                             |
| 36. | *meptazinol/                                                                                                                                                                                                                                                                |
| 37. | *methadone/                                                                                                                                                                                                                                                                 |
| 38. | *morphine/                                                                                                                                                                                                                                                                  |
| 39. | *oxycodone/                                                                                                                                                                                                                                                                 |
| 40. | *opiate/                                                                                                                                                                                                                                                                    |
| 41. | *pentazocine/                                                                                                                                                                                                                                                               |
| 42. | *pethidine/                                                                                                                                                                                                                                                                 |
| 43. | *tramadol/                                                                                                                                                                                                                                                                  |
| 44. | (buprenorphine* or codeine* or dextromoramide* or diamorphine* or dihydrocodeine* or dipipanone* or fentanyl or hydromorphone* or meptazinol or methadone* or morphine* or oxycodone or papaveretum or pentazocine or pethidine or tapentadol or tramadol or heroin).ti,ab. |
| 45. | (z drug* or z hypnotic* or non-benzodiazepin* or nonbenzodiazepin* or zaleplon or zopiclone or zolpidem).ti,ab.                                                                                                                                                             |
| 46. | (generation adj3 hypnotic*).ti,ab.                                                                                                                                                                                                                                          |
| 47. | *benzodiazepine derivative/                                                                                                                                                                                                                                                 |
| 48. | (benzodiazepin* or bzd or flurazepam or loprazolam or lormetazepam or nitrazepam or temazepam or diazepam or chlordiazepoxide or lorazepam or oxazepam).ti,ab.                                                                                                              |
| 49. | *pregabalin/                                                                                                                                                                                                                                                                |
| 50. | (gabapentin* or pregabalin*).ti,ab.                                                                                                                                                                                                                                         |
| 51. | *antidepressant agent/                                                                                                                                                                                                                                                      |
| 52. | (antidepress* or anti depress* or thymoanaleptic* or thymoleptic* or MAOI* or "monoamine oxidase inhibit*" or RIMA* or tricyclic* or SSRI* or SNRI* or SNORI*).ti,ab.                                                                                                       |
| 53. | *amitriptyline/                                                                                                                                                                                                                                                             |
| 54. | *amoxapine/                                                                                                                                                                                                                                                                 |
| 55. | *clomipramine/                                                                                                                                                                                                                                                              |
| 56. | *dosulepin/                                                                                                                                                                                                                                                                 |
| 57. | *doxepin/                                                                                                                                                                                                                                                                   |
| 58. | *imipramine/                                                                                                                                                                                                                                                                |
| 59. | *lofepramine/                                                                                                                                                                                                                                                               |
| 60. | *maprotiline/                                                                                                                                                                                                                                                               |
| 61. | *mianserin/                                                                                                                                                                                                                                                                 |
| 62. | *nortriptyline/                                                                                                                                                                                                                                                             |
| 63. | *protriptyline/                                                                                                                                                                                                                                                             |
| 64. | *trazodone/                                                                                                                                                                                                                                                                 |
| 65. | *trimipramine/                                                                                                                                                                                                                                                              |
| 66. | *isocarboxazid/                                                                                                                                                                                                                                                             |
| 67. | *moclobemide/                                                                                                                                                                                                                                                               |
| 68. | *phenelzine/                                                                                                                                                                                                                                                                |
| 69. | *tranylcypromine/                                                                                                                                                                                                                                                           |

|      |                                                                                                                                                                                                                                                                                                                                                                                                                                                                                                               |
|------|---------------------------------------------------------------------------------------------------------------------------------------------------------------------------------------------------------------------------------------------------------------------------------------------------------------------------------------------------------------------------------------------------------------------------------------------------------------------------------------------------------------|
| 70.  | *citalopram/                                                                                                                                                                                                                                                                                                                                                                                                                                                                                                  |
| 71.  | *fluoxetine/                                                                                                                                                                                                                                                                                                                                                                                                                                                                                                  |
| 72.  | *fluvoxamine/                                                                                                                                                                                                                                                                                                                                                                                                                                                                                                 |
| 73.  | *paroxetine/                                                                                                                                                                                                                                                                                                                                                                                                                                                                                                  |
| 74.  | *sertraline/                                                                                                                                                                                                                                                                                                                                                                                                                                                                                                  |
| 75.  | *5 hydroxytryptophan/                                                                                                                                                                                                                                                                                                                                                                                                                                                                                         |
| 76.  | *duloxetine/                                                                                                                                                                                                                                                                                                                                                                                                                                                                                                  |
| 77.  | *flupentixol/                                                                                                                                                                                                                                                                                                                                                                                                                                                                                                 |
| 78.  | *tryptophan/                                                                                                                                                                                                                                                                                                                                                                                                                                                                                                  |
| 79.  | *venlafaxine/                                                                                                                                                                                                                                                                                                                                                                                                                                                                                                 |
| 80.  | (amitriptyline or amoxapine or clomipramine or dosulepin or doxepin or imipramine or lofepramine or maprotiline or mianserin or nortriptyline or protriptyline or trazodone or trimipramine or isocarboxazid or moclobemide or phenelzine or tranylcypromine or citalopram or escitalopram or fluoxetine or fluvoxamine or paroxetine or sertraline or agomelatine or duloxetine or flupentixol or mirtazapine or nefazodone or oxitriptan or reboxetine or tryptophan or venlafaxine or vortioxetine).ti,ab. |
| 81.  | or/27-80                                                                                                                                                                                                                                                                                                                                                                                                                                                                                                      |
| 82.  | 26 and 81                                                                                                                                                                                                                                                                                                                                                                                                                                                                                                     |
| 83.  | random*.ti,ab.                                                                                                                                                                                                                                                                                                                                                                                                                                                                                                |
| 84.  | factorial*.ti,ab.                                                                                                                                                                                                                                                                                                                                                                                                                                                                                             |
| 85.  | (crossover* or cross over*).ti,ab.                                                                                                                                                                                                                                                                                                                                                                                                                                                                            |
| 86.  | ((doubl* or singl*) adj blind*).ti,ab.                                                                                                                                                                                                                                                                                                                                                                                                                                                                        |
| 87.  | (assign* or allocat* or volunteer* or placebo*).ti,ab.                                                                                                                                                                                                                                                                                                                                                                                                                                                        |
| 88.  | crossover procedure/                                                                                                                                                                                                                                                                                                                                                                                                                                                                                          |
| 89.  | single blind procedure/                                                                                                                                                                                                                                                                                                                                                                                                                                                                                       |
| 90.  | randomized controlled trial/                                                                                                                                                                                                                                                                                                                                                                                                                                                                                  |
| 91.  | double blind procedure/                                                                                                                                                                                                                                                                                                                                                                                                                                                                                       |
| 92.  | or/83-91                                                                                                                                                                                                                                                                                                                                                                                                                                                                                                      |
| 93.  | systematic review/                                                                                                                                                                                                                                                                                                                                                                                                                                                                                            |
| 94.  | Meta-Analysis/                                                                                                                                                                                                                                                                                                                                                                                                                                                                                                |
| 95.  | (meta analy* or metanaly* or metaanaly* or meta regression).ti,ab.                                                                                                                                                                                                                                                                                                                                                                                                                                            |
| 96.  | ((systematic* or evidence*) adj2 (review* or overview*)).ti,ab.                                                                                                                                                                                                                                                                                                                                                                                                                                               |
| 97.  | (reference list* or bibliograph* or hand search* or manual search* or relevant journals).ab.                                                                                                                                                                                                                                                                                                                                                                                                                  |
| 98.  | (search strategy or search criteria or systematic search or study selection or data extraction).ab.                                                                                                                                                                                                                                                                                                                                                                                                           |
| 99.  | (search* adj4 literature).ab.                                                                                                                                                                                                                                                                                                                                                                                                                                                                                 |
| 100. | (medline or pubmed or cochrane or embase or psychlit or psyclit or psychinfo or psycinfo or cinahl or science citation index or bids or cancerlit).ab.                                                                                                                                                                                                                                                                                                                                                        |
| 101. | cochrane.jw.                                                                                                                                                                                                                                                                                                                                                                                                                                                                                                  |
| 102. | ((multiple treatment* or indirect or mixed) adj2 comparison*).ti,ab.                                                                                                                                                                                                                                                                                                                                                                                                                                          |
| 103. | or/93-102                                                                                                                                                                                                                                                                                                                                                                                                                                                                                                     |
| 104. | 82 and (92 or 103)                                                                                                                                                                                                                                                                                                                                                                                                                                                                                            |

### Cochrane Central Register of Controlled Trials (CENTRAL) (The Cochrane Library -Wiley) search terms

|     |                                                                    |
|-----|--------------------------------------------------------------------|
| #1. | MeSH descriptor: [Substance-Related Disorders] explode all trees   |
| #2. | MeSH descriptor: [Substance Withdrawal Syndrome] explode all trees |
| #3. | MeSH descriptor: [Inappropriate Prescribing] explode all trees     |
| #4. | MeSH descriptor: [Medical Overuse] explode all trees               |

|      |                                                                                                                                                                                                                                                                            |
|------|----------------------------------------------------------------------------------------------------------------------------------------------------------------------------------------------------------------------------------------------------------------------------|
| #5.  | MeSH descriptor: [Deprescriptions] explode all trees                                                                                                                                                                                                                       |
| #6.  | (abstinen* or abstain* or cessat* or detox* or discontinu* or reduc* or stop* or taper* or withdraw* or substitut* or depend* or addict* or abuse* or abusing or chronic or long* term or longterm or short* term or short term or misus* or overus* or deprescrib*):ti,ab |
| #7.  | (over* near/3 use* or using or utilisat* or utilizat*) near/3 (prescription* or prescrib* or drug* or medicine* or medication* or pharm*):ti,ab                                                                                                                            |
| #8.  | inappropriate near/3 (prescription or prescrib*):ti,ab                                                                                                                                                                                                                     |
| #9.  | (OR #1-#8)                                                                                                                                                                                                                                                                 |
| #10. | MeSH descriptor: [Narcotics] explode all trees                                                                                                                                                                                                                             |
| #11. | MeSH descriptor: [Analgesics, Opioid] explode all trees                                                                                                                                                                                                                    |
| #12. | (analgesic* near/3 opioid* or narcotic near/3 agent*):ti,ab                                                                                                                                                                                                                |
| #13. | MeSH descriptor: [Buprenorphine] explode all trees                                                                                                                                                                                                                         |
| #14. | MeSH descriptor: [Codeine] explode all trees                                                                                                                                                                                                                               |
| #15. | MeSH descriptor: [Dextromoramide] explode all trees                                                                                                                                                                                                                        |
| #16. | MeSH descriptor: [Heroin] explode all trees                                                                                                                                                                                                                                |
| #17. | MeSH descriptor: [Fentanyl] explode all trees                                                                                                                                                                                                                              |
| #18. | MeSH descriptor: [Hydromorphone] explode all trees                                                                                                                                                                                                                         |
| #19. | MeSH descriptor: [Meptazinol] explode all trees                                                                                                                                                                                                                            |
| #20. | MeSH descriptor: [Methadone] explode all trees                                                                                                                                                                                                                             |
| #21. | MeSH descriptor: [Morphine] explode all trees                                                                                                                                                                                                                              |
| #22. | MeSH descriptor: [Oxycodone] explode all trees                                                                                                                                                                                                                             |
| #23. | MeSH descriptor: [Opium] explode all trees                                                                                                                                                                                                                                 |
| #24. | MeSH descriptor: [Pentazocine] explode all trees                                                                                                                                                                                                                           |
| #25. | MeSH descriptor: [Meperidine] explode all trees                                                                                                                                                                                                                            |
| #26. | MeSH descriptor: [Tramadol] explode all trees                                                                                                                                                                                                                              |
| #27. | (buprenorphine* or codeine* or dextromoramide* or diamorphine* or dihydrocodeine* or dipipanone* or fentanyl or hydromorphone* or meptazinol or methadone* or morphine* or oxycodone or papaveretum or pentazocine or pethidine or tapentadol or tramadol or heroin):ti,ab |
| #28. | (z drug* or z hypnotic* or non-benzodiazepin* or nonbenzodiazepin* or zaleplon or zopiclone or zolpidem):ti,ab                                                                                                                                                             |
| #29. | (generation near/3 hypnotic*):ti,ab                                                                                                                                                                                                                                        |
| #30. | MeSH descriptor: [Benzodiazepines] explode all trees                                                                                                                                                                                                                       |
| #31. | (benzodiazepin* or bzd or flurazepam or loprazolam or lormetazepam or nitrazepam or temazepam or diazepam or chlordiazepoxide or lorazepam or oxazepam):ti,ab                                                                                                              |
| #32. | MeSH descriptor: [Pregabalin] explode all trees                                                                                                                                                                                                                            |
| #33. | (gabapentin* or pregabalin*):ti,ab                                                                                                                                                                                                                                         |
| #34. | MeSH descriptor: [Antidepressive Agents] explode all trees                                                                                                                                                                                                                 |
| #35. | (antidepress* or anti depress* or thymoanaleptic* or thymoleptic* or MAOI* or "monoamine oxidase inhibit*" or RIMA* or tricyclic* or SSRI* or SNRI* or SNORI*):ti,ab                                                                                                       |
| #36. | MeSH descriptor: [Amitriptyline] explode all trees                                                                                                                                                                                                                         |
| #37. | MeSH descriptor: [Amoxapine] explode all trees                                                                                                                                                                                                                             |
| #38. | MeSH descriptor: [Clomipramine] explode all trees                                                                                                                                                                                                                          |
| #39. | MeSH descriptor: [Dothiepin] explode all trees                                                                                                                                                                                                                             |
| #40. | MeSH descriptor: [Doxepin] explode all trees                                                                                                                                                                                                                               |
| #41. | MeSH descriptor: [Imipramine] explode all trees                                                                                                                                                                                                                            |
| #42. | MeSH descriptor: [Lofepramine] explode all trees                                                                                                                                                                                                                           |
| #43. | MeSH descriptor: [Maprotiline] explode all trees                                                                                                                                                                                                                           |
| #44. | MeSH descriptor: [Mianserin] explode all trees                                                                                                                                                                                                                             |
| #45. | MeSH descriptor: [Nortriptyline] explode all trees                                                                                                                                                                                                                         |

|      |                                                                                                                                                                                                                                                                                                                                                                                                                                                                                                              |
|------|--------------------------------------------------------------------------------------------------------------------------------------------------------------------------------------------------------------------------------------------------------------------------------------------------------------------------------------------------------------------------------------------------------------------------------------------------------------------------------------------------------------|
| #46. | MeSH descriptor: [Protriptyline] explode all trees                                                                                                                                                                                                                                                                                                                                                                                                                                                           |
| #47. | MeSH descriptor: [Trazodone] explode all trees                                                                                                                                                                                                                                                                                                                                                                                                                                                               |
| #48. | MeSH descriptor: [Trimipramine] explode all trees                                                                                                                                                                                                                                                                                                                                                                                                                                                            |
| #49. | MeSH descriptor: [Isocarboxazid] explode all trees                                                                                                                                                                                                                                                                                                                                                                                                                                                           |
| #50. | MeSH descriptor: [Moclobemide] explode all trees                                                                                                                                                                                                                                                                                                                                                                                                                                                             |
| #51. | MeSH descriptor: [Phenelzine] explode all trees                                                                                                                                                                                                                                                                                                                                                                                                                                                              |
| #52. | MeSH descriptor: [Tranlycypromine] explode all trees                                                                                                                                                                                                                                                                                                                                                                                                                                                         |
| #53. | MeSH descriptor: [Citalopram] explode all trees                                                                                                                                                                                                                                                                                                                                                                                                                                                              |
| #54. | MeSH descriptor: [Fluoxetine] explode all trees                                                                                                                                                                                                                                                                                                                                                                                                                                                              |
| #55. | MeSH descriptor: [Fluvoxamine] explode all trees                                                                                                                                                                                                                                                                                                                                                                                                                                                             |
| #56. | MeSH descriptor: [Paroxetine] explode all trees                                                                                                                                                                                                                                                                                                                                                                                                                                                              |
| #57. | MeSH descriptor: [Sertraline] explode all trees                                                                                                                                                                                                                                                                                                                                                                                                                                                              |
| #58. | MeSH descriptor: [5-Hydroxytryptophan] explode all trees                                                                                                                                                                                                                                                                                                                                                                                                                                                     |
| #59. | MeSH descriptor: [Duloxetine Hydrochloride] explode all trees                                                                                                                                                                                                                                                                                                                                                                                                                                                |
| #60. | MeSH descriptor: [Flupenthixol] explode all trees                                                                                                                                                                                                                                                                                                                                                                                                                                                            |
| #61. | MeSH descriptor: [Tryptophan] explode all trees                                                                                                                                                                                                                                                                                                                                                                                                                                                              |
| #62. | MeSH descriptor: [Venlafaxine Hydrochloride] explode all trees                                                                                                                                                                                                                                                                                                                                                                                                                                               |
| #63. | (amitriptyline or amoxapine or clomipramine or dosulepin or doxepin or imipramine or lofepramine or maprotiline or mianserin or nortriptyline or protriptyline or trazodone or trimipramine or isocarboxazid or moclobemide or phenelzine or tranlycypromine or citalopram or escitalopram or fluoxetine or fluvoxamine or paroxetine or sertraline or agomelatine or duloxetine or flupentixol or mirtazapine or nefazodone or oxitriptan or reboxetine or tryptophan or venlafaxine or vortioxetine):ti,ab |
| #64. | (OR #10-#63)                                                                                                                                                                                                                                                                                                                                                                                                                                                                                                 |
| #65. | #9 and #64                                                                                                                                                                                                                                                                                                                                                                                                                                                                                                   |

### PsycINFO (ProQuest) search terms

|    |                                                                                                                                                                                                                                                                                                                                                                                                                                                                                                                                                                                                                                                                                                                                                                                                                                                                                                                                                                                                                                                                                                                                                                                                                                                                                                                                                                                                                                                                                                                                                                                                                                                                                                                                                                                                                                                                                                                                               |
|----|-----------------------------------------------------------------------------------------------------------------------------------------------------------------------------------------------------------------------------------------------------------------------------------------------------------------------------------------------------------------------------------------------------------------------------------------------------------------------------------------------------------------------------------------------------------------------------------------------------------------------------------------------------------------------------------------------------------------------------------------------------------------------------------------------------------------------------------------------------------------------------------------------------------------------------------------------------------------------------------------------------------------------------------------------------------------------------------------------------------------------------------------------------------------------------------------------------------------------------------------------------------------------------------------------------------------------------------------------------------------------------------------------------------------------------------------------------------------------------------------------------------------------------------------------------------------------------------------------------------------------------------------------------------------------------------------------------------------------------------------------------------------------------------------------------------------------------------------------------------------------------------------------------------------------------------------------|
| 1. | <p> ((((MAINSUBJECT.EXACT("Drug Withdrawal") OR<br/> MAINSUBJECT.EXACT("Substance Use Disorder")) OR ti,ab(abstinen* OR abstain*<br/> OR cessat* OR detox* OR discontinu* OR reduc* OR stop* OR taper* OR withdraw*<br/> OR substitut* OR depend* OR addict* OR abuse* OR abusing OR chronic OR long*<br/> term OR longterm OR short* term OR short term OR misus* OR overus* OR<br/> deprescrib*) OR ti,ab(over* NEAR/3 (use* OR using OR utilisat* OR utilizat*) NEAR/3<br/> (prescription* OR prescrib* OR drug* OR medicine* OR medication* OR pharm*)) OR<br/> ti,ab(inappropriate NEAR/3 (prescription OR prescrib*))) AND<br/> ((MAINSUBJECT.EXACT.EXPLODE("Analgesic Drugs") OR<br/> MAINSUBJECT.EXACT.EXPLODE("Narcotic Drugs")) OR ti,ab(analgesic* NEAR/3<br/> (opioid* OR narcotic) NEAR/3 agent*) OR<br/> (MAINSUBJECT.EXACT.EXPLODE("Buprenorphine") OR<br/> MAINSUBJECT.EXACT.EXPLODE("Heroin") OR<br/> MAINSUBJECT.EXACT.EXPLODE("Methadone") OR<br/> MAINSUBJECT.EXACT.EXPLODE("Pentazocine") OR<br/> MAINSUBJECT.EXACT.EXPLODE("Morphine") OR<br/> MAINSUBJECT.EXACT.EXPLODE("Tramadol") OR<br/> MAINSUBJECT.EXACT.EXPLODE("Codeine") OR<br/> MAINSUBJECT.EXACT.EXPLODE("Fentanyl") OR<br/> MAINSUBJECT.EXACT.EXPLODE("Meperidine")) OR ti,ab(buprenorphine* OR<br/> codeine* OR dextromoramide* OR diamorphine* OR dihydrocodeine* OR dipipanone*<br/> OR fentanyl OR hydromorphone* OR meptazinol OR methadone* OR morphine* OR<br/> oxycodone OR papaveretum OR pentazocine OR pethidine OR tapentadol OR<br/> tramadol OR heroin) OR ti,ab(z drug* OR z hypnotic* OR non-benzodiazepin* OR<br/> nonbenzodiazepin* OR zaleplon OR zopiclone OR zolpidem) OR ti,ab(generation<br/> NEAR/3 hypnotic*) OR MAINSUBJECT.EXACT.EXPLODE("Benzodiazepines") OR<br/> ti,ab(benzodiazepin* OR bzd OR flurazepam OR loprazolam OR lormetazepam OR<br/> nitrazepam OR temazepam OR diazepam OR chlordiazepoxide OR lorazepam OR </p> |
|----|-----------------------------------------------------------------------------------------------------------------------------------------------------------------------------------------------------------------------------------------------------------------------------------------------------------------------------------------------------------------------------------------------------------------------------------------------------------------------------------------------------------------------------------------------------------------------------------------------------------------------------------------------------------------------------------------------------------------------------------------------------------------------------------------------------------------------------------------------------------------------------------------------------------------------------------------------------------------------------------------------------------------------------------------------------------------------------------------------------------------------------------------------------------------------------------------------------------------------------------------------------------------------------------------------------------------------------------------------------------------------------------------------------------------------------------------------------------------------------------------------------------------------------------------------------------------------------------------------------------------------------------------------------------------------------------------------------------------------------------------------------------------------------------------------------------------------------------------------------------------------------------------------------------------------------------------------|

|  |                                                                                                                                                                                                                                                                                                                                                                                                                                                                                                                                                                                                                                                                                                                                                                                                                                                                                                                                                                                                                                                                                                                                                                                                                                                                                                                                                                                                                                                                                                                                                                                                                                                                                                                                                                                                                                                                                                                                                                                                                                                                                                                                                                                                                                                                                                                                                                                                                                                                                                                                                                                                                                                                                                                                                                                                   |
|--|---------------------------------------------------------------------------------------------------------------------------------------------------------------------------------------------------------------------------------------------------------------------------------------------------------------------------------------------------------------------------------------------------------------------------------------------------------------------------------------------------------------------------------------------------------------------------------------------------------------------------------------------------------------------------------------------------------------------------------------------------------------------------------------------------------------------------------------------------------------------------------------------------------------------------------------------------------------------------------------------------------------------------------------------------------------------------------------------------------------------------------------------------------------------------------------------------------------------------------------------------------------------------------------------------------------------------------------------------------------------------------------------------------------------------------------------------------------------------------------------------------------------------------------------------------------------------------------------------------------------------------------------------------------------------------------------------------------------------------------------------------------------------------------------------------------------------------------------------------------------------------------------------------------------------------------------------------------------------------------------------------------------------------------------------------------------------------------------------------------------------------------------------------------------------------------------------------------------------------------------------------------------------------------------------------------------------------------------------------------------------------------------------------------------------------------------------------------------------------------------------------------------------------------------------------------------------------------------------------------------------------------------------------------------------------------------------------------------------------------------------------------------------------------------------|
|  | <p>oxazepam) OR (MAINSUBJECT.EXACT.EXPLODE("Pregabalin") OR MAINSUBJECT.EXACT.EXPLODE("Gabapentin")) OR ti,ab(gabapentin* OR pregabalin*) OR MAINSUBJECT.EXACT.EXPLODE("Antidepressant Drugs") OR ti,ab(antidepress* OR anti depress* OR thymoanaleptic* OR thymoleptic* OR MAOI* OR "monoamine oxidase inhibit*" OR RIMA* OR tricyclic* OR SSRI* OR SNRI* OR SNORI*) OR (MAINSUBJECT.EXACT.EXPLODE("Doxepin") OR MAINSUBJECT.EXACT.EXPLODE("Tranlycypromine") OR MAINSUBJECT.EXACT.EXPLODE("Sertraline") OR MAINSUBJECT.EXACT.EXPLODE("Isocarboxazid") OR MAINSUBJECT.EXACT.EXPLODE("Tryptophan") OR MAINSUBJECT.EXACT.EXPLODE("Fluoxetine") OR MAINSUBJECT.EXACT.EXPLODE("Hydroxytryptophan (5-)") OR MAINSUBJECT.EXACT.EXPLODE("Nortriptyline") OR MAINSUBJECT.EXACT.EXPLODE("Citalopram") OR MAINSUBJECT.EXACT.EXPLODE("Phenelzine") OR MAINSUBJECT.EXACT.EXPLODE("Imipramine") OR MAINSUBJECT.EXACT.EXPLODE("Mianserin") OR MAINSUBJECT.EXACT.EXPLODE("Paroxetine") OR MAINSUBJECT.EXACT.EXPLODE("Moclobemide") OR MAINSUBJECT.EXACT.EXPLODE("Amitriptyline") OR MAINSUBJECT.EXACT.EXPLODE("Maprotiline") OR MAINSUBJECT.EXACT.EXPLODE("Trazodone") OR MAINSUBJECT.EXACT.EXPLODE("Fluvoxamine") OR MAINSUBJECT.EXACT.EXPLODE("Chlorimipramine")) OR ti,ab(amitriptyline OR amoxapine OR clomipramine OR dosulepin OR doxepin OR imipramine OR lofepramine OR maprotiline OR mianserin OR nortriptyline OR protriptyline OR trazodone OR trimipramine OR isocarboxazid OR moclobemide OR phenelzine OR tranlycypromine OR citalopram OR escitalopram OR fluoxetine OR fluvoxamine OR paroxetine OR sertraline OR agomelatine OR duloxetine OR flupentixol OR mirtazapine OR nefazodone OR oxitriptan OR reboxetine OR tryptophan OR venlafaxine OR vortioxetine))) AND ((su.exact.explode("clinical trials") OR ti,ab((clinical OR control*) NEAR/3 trial*) OR ti,ab((singl* OR doubl* OR trebl* OR tripl*) NEAR/5 (blind* OR mask*)) OR ti,ab(volunteer* OR control-group OR controls) OR su.exact("placebo") OR ti,ab(placebo*)) OR (((SU.EXACT("Literature Review") OR RTYPE(review) OR ti(review) OR me(literature review) AND (ti,ab(systematic OR evidence OR methodol* OR quantitative*))) OR (SU.EXACT("Meta Analysis") OR ti,ab(meta-analys* OR metanalys* OR metaanalys* OR meta analys*) OR ti,ab((systematic OR evidence* OR methodol* OR quantitative*) NEAR/3 (review* OR overview*)) OR ti,ab((pool* OR combined OR combining) NEAR/2 (data OR trials OR studies OR results)) OR RTYPE(systematic OR meta*) OR ME(meta analysis OR systematic review)))) NOT (su.exact.explode("rodents") OR su.exact.explode("mice") OR (su.exact("animals") NOT (su.exact("human males") OR su.exact("human females")))) OR ti(rat OR rats OR mouse OR mice))) AND (la.exact("English"))</p> |
|--|---------------------------------------------------------------------------------------------------------------------------------------------------------------------------------------------------------------------------------------------------------------------------------------------------------------------------------------------------------------------------------------------------------------------------------------------------------------------------------------------------------------------------------------------------------------------------------------------------------------------------------------------------------------------------------------------------------------------------------------------------------------------------------------------------------------------------------------------------------------------------------------------------------------------------------------------------------------------------------------------------------------------------------------------------------------------------------------------------------------------------------------------------------------------------------------------------------------------------------------------------------------------------------------------------------------------------------------------------------------------------------------------------------------------------------------------------------------------------------------------------------------------------------------------------------------------------------------------------------------------------------------------------------------------------------------------------------------------------------------------------------------------------------------------------------------------------------------------------------------------------------------------------------------------------------------------------------------------------------------------------------------------------------------------------------------------------------------------------------------------------------------------------------------------------------------------------------------------------------------------------------------------------------------------------------------------------------------------------------------------------------------------------------------------------------------------------------------------------------------------------------------------------------------------------------------------------------------------------------------------------------------------------------------------------------------------------------------------------------------------------------------------------------------------------|

### Health Technology appraisals (HTA) (Centre for Reviews and Disseminations) search terms

|     |                                                                                                                                                                                                                                                                        |
|-----|------------------------------------------------------------------------------------------------------------------------------------------------------------------------------------------------------------------------------------------------------------------------|
| 1.  | MeSH DESCRIPTOR Substance-Related Disorders EXPLODE ALL TREES                                                                                                                                                                                                          |
| 2.  | (MeSH descriptor Substance Withdrawal Syndrome explode all trees)                                                                                                                                                                                                      |
| 3.  | (MeSH descriptor Inappropriate Prescribing explode all trees)                                                                                                                                                                                                          |
| 4.  | (MeSH descriptor Medical Overuse explode all trees)                                                                                                                                                                                                                    |
| 5.  | (MeSH descriptor Deprescriptions explode all trees)                                                                                                                                                                                                                    |
| 6.  | ((abstinen* or abstain* or cessat* or detox* or discontinu* or reduc* or stop* or taper* or withdraw* or substitut* or depend* or addict* or abuse* or abusing or chronic or long* term or longterm or short* term or short term or misus* or overus* or deprescrib*)) |
| 7.  | ((over* adj3 (use* or using or utilisat* or utilizat*) adj3 (prescription* or prescrib* or drug* or medicine* or medication* or pharm*))                                                                                                                               |
| 8.  | ((inappropriate adj3 (prescription or prescrib*))                                                                                                                                                                                                                      |
| 9.  | #1 OR #2 OR #3 OR #4 OR #5 OR #6 OR #7 OR #8                                                                                                                                                                                                                           |
| 10. | (MeSH descriptor Narcotics explode all trees)                                                                                                                                                                                                                          |

|     |                                                                                                                                                                                                                                                                      |
|-----|----------------------------------------------------------------------------------------------------------------------------------------------------------------------------------------------------------------------------------------------------------------------|
| 11. | (MeSH descriptor: [Analgesics, Opioid] explode all trees)                                                                                                                                                                                                            |
| 12. | ((analgesic* adj3 (opioid* or narcotic) adj3 agent*))                                                                                                                                                                                                                |
| 13. | (MeSH descriptor: [Buprenorphine] explode all trees)                                                                                                                                                                                                                 |
| 14. | (MeSH descriptor: [Codeine] explode all trees)                                                                                                                                                                                                                       |
| 15. | (MeSH descriptor: [Dextromoramide] explode all trees)                                                                                                                                                                                                                |
| 16. | (MeSH descriptor: [Heroin] explode all trees)                                                                                                                                                                                                                        |
| 17. | (MeSH descriptor: [Fentanyl] explode all trees)                                                                                                                                                                                                                      |
| 18. | (MeSH descriptor: [Hydromorphone] explode all trees)                                                                                                                                                                                                                 |
| 19. | (MeSH descriptor: [Meptazinol] explode all trees)                                                                                                                                                                                                                    |
| 20. | (MeSH descriptor: [Methadone] explode all trees)                                                                                                                                                                                                                     |
| 21. | (MeSH descriptor: [Morphine] explode all trees)                                                                                                                                                                                                                      |
| 22. | (MeSH descriptor: [Oxycodone] explode all trees)                                                                                                                                                                                                                     |
| 23. | (MeSH descriptor: [Opium] explode all trees)                                                                                                                                                                                                                         |
| 24. | (MeSH descriptor: [Pentazocine] explode all trees)                                                                                                                                                                                                                   |
| 25. | (MeSH descriptor: [Meperidine] explode all trees)                                                                                                                                                                                                                    |
| 26. | (MeSH descriptor: [Tramadol] explode all trees)                                                                                                                                                                                                                      |
| 27. | (buprenorphine* or codeine* or dextromoramide* or diamorphine* or dihydrocodeine* or dipipanone* or fentanyl or hydromorphone* or meptazinol or methadone* or morphine* or oxycodone or papaveretum or pentazocine or pethidine or tapentadol or tramadol or heroin) |
| 28. | (z drug* or z hypnotic* or non-benzodiazepin* or nonbenzodiazepin* or zaleplon or zopiclone or zolpidem)                                                                                                                                                             |
| 29. | (generation adj3 hypnotic*)                                                                                                                                                                                                                                          |
| 30. | (MeSH descriptor: [Benzodiazepines] explode all trees)                                                                                                                                                                                                               |
| 31. | (benzodiazepin* or bzd or flurazepam or loprazolam or lormetazepam or nitrazepam or temazepam or diazepam or chlordiazepoxide or lorazepam or oxazepam)                                                                                                              |
| 32. | (MeSH descriptor: [Pregabalin] explode all trees)                                                                                                                                                                                                                    |
| 33. | (gabapentin* or pregabalin*)                                                                                                                                                                                                                                         |
| 34. | (MeSH descriptor: [Antidepressive Agents] explode all trees)                                                                                                                                                                                                         |
| 35. | (antidepress* or anti depress* or thymoanaleptic* or thymoleptic* or MAOI* or "monoamine oxidase inhibit*" or RIMA* or tricyclic* or SSRI* or SNRI* or SNORI*)                                                                                                       |
| 36. | (MeSH descriptor: [Amitriptyline] explode all trees)                                                                                                                                                                                                                 |
| 37. | (MeSH descriptor: [Amoxapine] explode all trees)                                                                                                                                                                                                                     |
| 38. | (MeSH descriptor: [Clomipramine] explode all trees)                                                                                                                                                                                                                  |
| 39. | (MeSH descriptor: [Dothiepin] explode all trees)                                                                                                                                                                                                                     |
| 40. | (MeSH descriptor: [Doxepin] explode all trees)                                                                                                                                                                                                                       |
| 41. | (MeSH descriptor: [Imipramine] explode all trees)                                                                                                                                                                                                                    |
| 42. | (MeSH descriptor: [Lofepramine] explode all trees)                                                                                                                                                                                                                   |
| 43. | (MeSH descriptor: [Maprotiline] explode all trees)                                                                                                                                                                                                                   |
| 44. | (MeSH descriptor: [Mianserin] explode all trees)                                                                                                                                                                                                                     |
| 45. | (MeSH descriptor: [Nortriptyline] explode all trees)                                                                                                                                                                                                                 |
| 46. | (MeSH descriptor: [Protriptyline] explode all trees)                                                                                                                                                                                                                 |
| 47. | (MeSH descriptor: [Trazodone] explode all trees)                                                                                                                                                                                                                     |
| 48. | (MeSH descriptor: [Trimipramine] explode all trees)                                                                                                                                                                                                                  |
| 49. | (MeSH descriptor: [Isocarboxazid] explode all trees)                                                                                                                                                                                                                 |
| 50. | (MeSH descriptor: [Moclobemide] explode all trees)                                                                                                                                                                                                                   |
| 51. | (MeSH descriptor: [Phenelzine] explode all trees)                                                                                                                                                                                                                    |
| 52. | (MeSH descriptor: [Tranylcypromine] explode all trees)                                                                                                                                                                                                               |
| 53. | (MeSH descriptor: [Citalopram] explode all trees)                                                                                                                                                                                                                    |

|     |                                                                                                                                                                                                                                                                                                                                                                                                                                                                                                        |
|-----|--------------------------------------------------------------------------------------------------------------------------------------------------------------------------------------------------------------------------------------------------------------------------------------------------------------------------------------------------------------------------------------------------------------------------------------------------------------------------------------------------------|
| 54. | (MeSH descriptor: [Fluoxetine] explode all trees)                                                                                                                                                                                                                                                                                                                                                                                                                                                      |
| 55. | (MeSH descriptor: [Fluvoxamine] explode all trees)                                                                                                                                                                                                                                                                                                                                                                                                                                                     |
| 56. | (MeSH descriptor: [Paroxetine] explode all trees)                                                                                                                                                                                                                                                                                                                                                                                                                                                      |
| 57. | (MeSH descriptor: [Sertraline] explode all trees)                                                                                                                                                                                                                                                                                                                                                                                                                                                      |
| 58. | (MeSH descriptor: [5-Hydroxytryptophan] explode all trees)                                                                                                                                                                                                                                                                                                                                                                                                                                             |
| 59. | (MeSH descriptor: [Duloxetine Hydrochloride] explode all trees)                                                                                                                                                                                                                                                                                                                                                                                                                                        |
| 60. | (MeSH descriptor: [Flupenthixol] explode all trees)                                                                                                                                                                                                                                                                                                                                                                                                                                                    |
| 61. | (MeSH descriptor: [Tryptophan] explode all trees)                                                                                                                                                                                                                                                                                                                                                                                                                                                      |
| 62. | (MeSH descriptor: [Venlafaxine Hydrochloride] explode all trees)                                                                                                                                                                                                                                                                                                                                                                                                                                       |
| 63. | (amitriptyline or amoxapine or clomipramine or dosulepin or doxepin or imipramine or lofepramine or maprotiline or mianserin or nortriptyline or protriptyline or trazodone or trimipramine or isocarboxazid or moclobemide or phenelzine or tranlycypromine or citalopram or escitalopram or fluoxetine or fluvoxamine or paroxetine or sertraline or agomelatine or duloxetine or flupentixol or mirtazapine or nefazodone or oxitriptan or reboxetine or tryptophan or venlafaxine or vortioxetine) |
| 64. | #10 OR #11 OR #12 OR #13 OR #14 OR #15 OR #16 OR #17 OR #18 OR #19 OR #20 OR #21 OR #22 OR #23 OR #24 OR #25 OR #26 OR #27 OR #28 OR #29 OR #30 OR #31 OR #32 OR #33 OR #34 OR #35 OR #36 OR #37 OR #38 OR #39 OR #40 OR #41 OR #42 OR #43 OR #44 OR #45 OR #46 OR #47 OR #48 OR #49 OR #50 OR #51 OR #52 OR #53 OR #54 OR #55 OR #56 OR #57 OR #58 OR #59 OR #60 OR #61 OR #62 OR #63                                                                                                                 |
| 65. | #9 AND #64                                                                                                                                                                                                                                                                                                                                                                                                                                                                                             |

#### **Trials Register of Promoting Health Interventions (TRoPHI) search terms**

|     |                                                                                                                                                                                                                                                                                                                                                                                                                                                                                                                                                                                                    |
|-----|----------------------------------------------------------------------------------------------------------------------------------------------------------------------------------------------------------------------------------------------------------------------------------------------------------------------------------------------------------------------------------------------------------------------------------------------------------------------------------------------------------------------------------------------------------------------------------------------------|
| 1.  | Freetext (All but Authors): "substance-related disorders" OR "substance withdrawal syndrome" OR "inappropriate prescribing" OR "medical overuse" OR "deprescriptions" OR "abstinen*" or "abstain*" or "cessat*" or "detox*" or "discontinu*" or "reduc*" or "stop*" or "taper*" or "withdraw*" or "substitut*" or "depend*" or "addict*" or "abuse*" or "abusing" or "chronic" or "long* term" or "longterm" or "short* term" or "short term" or "misus*" or "overus*" OR "deprescrib**"                                                                                                           |
| 2.  | Freetext (All but Authors): "over*" near "use*" near "prescri**"                                                                                                                                                                                                                                                                                                                                                                                                                                                                                                                                   |
| 3.  | Freetext (All but Authors): "inappropriate" near "prescri**"                                                                                                                                                                                                                                                                                                                                                                                                                                                                                                                                       |
| 4.  | 1 OR 2 OR 3                                                                                                                                                                                                                                                                                                                                                                                                                                                                                                                                                                                        |
| 5.  | Freetext (All but Authors): "buprenorphine*" or "codeine*" or "dextromoramide*" or "diamorphine*" or "dihydrocodeine*" or "dipipanone*" or "fentanyl" or "hydromorphone*" or "meptazinol" or "methadone*" or "morphine*" or "oxycodone" or "papaveretum" or "pentazocine" or "pethidine" or "tapentadol" or "tramadol" or "heroin"                                                                                                                                                                                                                                                                 |
| 6.  | Freetext (All but Authors): "z drug*" or "z hypnotic*" or "non-benzodiazepin*" or "nonbenzodiazepin*" or "zaleplon" or "zopiclone" or "zolpidem"                                                                                                                                                                                                                                                                                                                                                                                                                                                   |
| 7.  | Freetext (All but Authors): "generation" near "hypnotic"                                                                                                                                                                                                                                                                                                                                                                                                                                                                                                                                           |
| 8.  | Freetext (All but Authors): "benzodiazepin*" or "bzd" or "flurazepam" or "loprazolam" or "lormetazepam" or "nitrazepam" or "temazepam" or "diazepam" or "chlordiazepoxide" or "lorazepam" or "oxazepam"                                                                                                                                                                                                                                                                                                                                                                                            |
| 9.  | Freetext (All but Authors): "gabapentin*" or "pregabalin**"                                                                                                                                                                                                                                                                                                                                                                                                                                                                                                                                        |
| 10. | Freetext (All but Authors): "antidepress*" or "anti depress*" or "thymoanaleptic*" or "thymoleptic*" or "MAOI*" or "monoamine oxidase inhibit*" or "RIMA*" or "tricyclic*" or "SSRI*" or "SNRI*" or "SNORI**"                                                                                                                                                                                                                                                                                                                                                                                      |
| 11. | Freetext (All but Authors): "amitriptyline" or "amoxapine" or "clomipramine" or "dosulepin" or "doxepin" or "imipramine" or "lofepramine" or "maprotiline" or "mianserin" or "nortriptyline" or "protriptyline" or "trazodone" or "trimipramine" or "isocarboxazid" or "moclobemide" or "phenelzine" or "tranlycypromine" or "citalopram" or "escitalopram" or "fluoxetine" or "fluvoxamine" or "paroxetine" or "sertraline" or "agomelatine" or "duloxetine" or "flupentixol" or "mirtazapine" or "nefazodone" or "oxitriptan" or "reboxetine" or "tryptophan" or "venlafaxine" or "vortioxetine" |



|     |                                   |
|-----|-----------------------------------|
| 12. | 5 OR 6 OR 7 OR 8 OR 9 OR 10 OR 11 |
| 13. | 4 AND 12                          |

### ASSIA (Proquest) search terms

|    |                                                                                                                                                                                                                                                                                                                                                                                                                                                                                                                                                                                                                                                                                                                                                                                                                                                                                                                                                                                                                                                                                                                                                                                                                                                                                                                                                                                                                                                                                                                                                                                                                                                                                                                                                                                                                                                                                                                                                                                                                                                                                                                                                                                                                                                                                                                                                                                                                                                                                                                                                                                                                                                                                                                                                                                                                                                                                                                                                                                                                                        |
|----|----------------------------------------------------------------------------------------------------------------------------------------------------------------------------------------------------------------------------------------------------------------------------------------------------------------------------------------------------------------------------------------------------------------------------------------------------------------------------------------------------------------------------------------------------------------------------------------------------------------------------------------------------------------------------------------------------------------------------------------------------------------------------------------------------------------------------------------------------------------------------------------------------------------------------------------------------------------------------------------------------------------------------------------------------------------------------------------------------------------------------------------------------------------------------------------------------------------------------------------------------------------------------------------------------------------------------------------------------------------------------------------------------------------------------------------------------------------------------------------------------------------------------------------------------------------------------------------------------------------------------------------------------------------------------------------------------------------------------------------------------------------------------------------------------------------------------------------------------------------------------------------------------------------------------------------------------------------------------------------------------------------------------------------------------------------------------------------------------------------------------------------------------------------------------------------------------------------------------------------------------------------------------------------------------------------------------------------------------------------------------------------------------------------------------------------------------------------------------------------------------------------------------------------------------------------------------------------------------------------------------------------------------------------------------------------------------------------------------------------------------------------------------------------------------------------------------------------------------------------------------------------------------------------------------------------------------------------------------------------------------------------------------------------|
| 1. | <p>((MAINSUBJECT.EXACT.EXPLODE("Substance abuse disorders") OR ti,ab(abstinen* OR abstain* OR cessat* OR detox* OR discontinu* OR reduc* OR stop* OR taper* OR withdraw* OR substitut* OR depend* OR addict* OR abuse* OR abusing OR chronic OR long* term OR longterm OR short* term OR short term OR misus* OR overus* OR deprescrib*) OR ti,ab(over* NEAR/3 (use* OR using OR utilisat* OR utilizat*) NEAR/3 (prescription* OR prescrib* OR drug* OR medicine* OR medication* OR pharm*)) OR ti,ab(inappropriate NEAR/3 (prescription OR prescrib*))) AND ((MAINSUBJECT.EXACT.EXPLODE("Analgesics") OR MAINSUBJECT.EXACT.EXPLODE("Narcotics")) OR ti,ab(analgesic* NEAR/3 (opioid* or narcotic) NEAR/3 agent*) OR (MAINSUBJECT.EXACT.EXPLODE("Methadone") OR MAINSUBJECT.EXACT.EXPLODE("Heroin") OR MAINSUBJECT.EXACT.EXPLODE("Buprenorphine") OR MAINSUBJECT.EXACT.EXPLODE("Codeine") OR MAINSUBJECT.EXACT.EXPLODE("Hydromorphone") OR MAINSUBJECT.EXACT.EXPLODE("Tramadol") OR MAINSUBJECT.EXACT.EXPLODE("Morphine") OR MAINSUBJECT.EXACT.EXPLODE("Opium")) OR ti,ab(buprenorphine* or codeine* or dextromoramide* or diamorphine* or dihydrocodeine* or dipipanone* or fentanyl or hydromorphone* or meptazinol or methadone* or morphine* or oxycodone or papaveretum or pentazocine or pethidine or tapentadol or tramadol or heroin) OR ti,ab(z drug* or z hypnotic* or non-benzodiazepin* or nonbenzodiazepin* or zaleplon or zopiclone or zolpidem) OR ti,ab(generation NEAR/3 hypnotic*) OR MAINSUBJECT.EXACT.EXPLODE("Benzodiazepines") OR ti,ab(benzodiazepin* OR bzd OR flurazepam OR loprazolam OR lormetazepam OR nitrazepam OR temazepam OR diazepam OR chlordiazepoxide OR lorazepam OR oxazepam) OR MAINSUBJECT.EXACT.EXPLODE("Gabapentin") OR ti,ab(gabapentin* or pregabalin*) OR MAINSUBJECT.EXACT.EXPLODE("Antidepressant drugs") OR ti,ab(antidepress* or anti depress* or thymoanaleptic* or thymoleptic* or MAOI* or "monoamine oxidase inhibit*" or RIMA* or tricyclic* or SSRI* or SNRI* or SNORI*) OR (MAINSUBJECT.EXACT.EXPLODE("Imipramine") OR MAINSUBJECT.EXACT.EXPLODE("Amitriptyline") OR MAINSUBJECT.EXACT.EXPLODE("Clomipramine") OR MAINSUBJECT.EXACT.EXPLODE("Moclobemide") OR MAINSUBJECT.EXACT.EXPLODE("Sertraline") OR MAINSUBJECT.EXACT.EXPLODE("Paroxetine") OR MAINSUBJECT.EXACT.EXPLODE("Venlafaxine") OR MAINSUBJECT.EXACT.EXPLODE("Fluoxetine") OR MAINSUBJECT.EXACT.EXPLODE("Citalopram") OR MAINSUBJECT.EXACT.EXPLODE("Tryptophan")) OR ti,ab(amitriptyline OR amoxapine OR clomipramine OR dosulepin OR doxepin OR imipramine OR lofepramine OR maprotiline OR mianserin OR nortriptyline OR protriptyline OR trazodone OR trimipramine OR isocarboxazid OR moclobemide OR phenelzine OR tranylcypromine OR citalopram OR escitalopram OR fluoxetine OR fluvoxamine OR paroxetine OR sertraline OR agomelatine OR duloxetine OR flupentixol OR mirtazapine OR nefazodone OR oxitriptan OR reboxetine OR tryptophan OR venlafaxine OR vortioxetine))) AND (la.exact("English"))</p> |
|----|----------------------------------------------------------------------------------------------------------------------------------------------------------------------------------------------------------------------------------------------------------------------------------------------------------------------------------------------------------------------------------------------------------------------------------------------------------------------------------------------------------------------------------------------------------------------------------------------------------------------------------------------------------------------------------------------------------------------------------------------------------------------------------------------------------------------------------------------------------------------------------------------------------------------------------------------------------------------------------------------------------------------------------------------------------------------------------------------------------------------------------------------------------------------------------------------------------------------------------------------------------------------------------------------------------------------------------------------------------------------------------------------------------------------------------------------------------------------------------------------------------------------------------------------------------------------------------------------------------------------------------------------------------------------------------------------------------------------------------------------------------------------------------------------------------------------------------------------------------------------------------------------------------------------------------------------------------------------------------------------------------------------------------------------------------------------------------------------------------------------------------------------------------------------------------------------------------------------------------------------------------------------------------------------------------------------------------------------------------------------------------------------------------------------------------------------------------------------------------------------------------------------------------------------------------------------------------------------------------------------------------------------------------------------------------------------------------------------------------------------------------------------------------------------------------------------------------------------------------------------------------------------------------------------------------------------------------------------------------------------------------------------------------------|

#### A.1.3 Step 3: Grey literature

| Database                                                | Dates searched                | Search filter used |
|---------------------------------------------------------|-------------------------------|--------------------|
| King's Fund Library                                     | All years to 11 November 2018 | None               |
| National Institute for Health Research Journals Library | All years to 29 November 2018 | None               |

#### King's Fund Library search terms

|    |                                                                                                                                                                                    |
|----|------------------------------------------------------------------------------------------------------------------------------------------------------------------------------------|
| 1. | Prescription drug* on Annual report, journal article, journal supplement, electronic journal, King's funs publication, web publication, journal, statistical publication, web site |
| 2. | Drug* withdrawal on Annual report, journal article, journal supplement, electronic journal, King's funs publication, web publication, journal, statistical publication, web site   |
| 3. | Drug* Dependency on Annual report, journal article, journal supplement, electronic journal, King's funs publication, web publication, journal, statistical publication, web site   |
| 4. | Drug* dependent on Annual report, journal article, journal supplement, electronic journal, King's funs publication, web publication, journal, statistical publication, web site    |
| 5. | Drug* harm on Annual report, journal article, journal supplement, electronic journal, King's funs publication, web publication, journal, statistical publication, web site         |

**National Institute for Health Research Journals Library search terms**

|    |                     |
|----|---------------------|
| 1. | Prescription drugs  |
| 2. | Prescription harm   |
| 3. | Prescription misuse |

**Table S4:** Estimates of continuous receipt of a prescription duration by medicine class (latest estimated retrospective duration in months as at March 2018: 1 month; 2 to 5 months; 6 to 11 months; 12 to 34 months; and 35-36 months) by sex, age group and deprivation

| <b>Duration/characteristic</b>                                                | <b>Antidepressants</b> | <b>Opioids</b> | <b>Gabapentinoids</b> | <b>Benzodiazepines</b> | <b>Z-drugs</b> |
|-------------------------------------------------------------------------------|------------------------|----------------|-----------------------|------------------------|----------------|
| <i>People estimated to have been in receipt of a prescription for 1 month</i> |                        |                |                       |                        |                |
| All                                                                           | 524,765 (11.7)         | 448,018 (19.1) | 95,453 (11.2)         | 104,593 (24.9)         | 73,066 (20.1)  |
| Male <sup>¶</sup>                                                             | 176,057 (11.8)         | 172,774 (19.8) | 35,321 (10.7)         | 37,116 (24.9)          | 27,942 (20.4)  |
| Female                                                                        | 346,132 (11.6)         | 273,077 (18.6) | 59,989 (11.4)         | 66,972 (24.8)          | 44,807 (19.7)  |
| <i>Age (years) <sup>§</sup></i>                                               |                        |                |                       |                        |                |
| 18-24                                                                         | 45,199 (21.3)          | 13,879 (50.5)  | 1,853 (19.2)          | 4,073 (54.0)           | 3,411 (57.1)   |
| 25-44                                                                         | 170,098 (15.3)         | 92,053 (27.4)  | 18,868 (13.2)         | 29,899 (37.3)          | 18,866 (31.0)  |
| 45-64                                                                         | 197,504 (10.9)         | 160,440 (17.9) | 40,324 (10.8)         | 36,453 (25.9)          | 26,411 (20.1)  |
| 65-74                                                                         | 59,641 (8.7)           | 85,832 (16.6)  | 17,856 (10.9)         | 15,999 (20.3)          | 11,458 (16.3)  |
| 75 ≥                                                                          | 49,084 (7.4)           | 93,468 (16.6)  | 16,389 (10.0)         | 17,637 (15.8)          | 12,592 (13.2)  |
| <i>IMD quintile <sup>†</sup></i>                                              |                        |                |                       |                        |                |
| 1 (least deprived)                                                            | 119,400 (12.4)         | 87,381 (21.9)  | 18,681 (12.5)         | 27,992 (29.6)          | 19,072 (22.2)  |
| 2                                                                             | 117,257 (11.8)         | 94,709 (20.1)  | 19,764 (11.6)         | 25,174 (26.1)          | 17,015 (20.8)  |
| 3                                                                             | 111,262 (11.9)         | 93,627 (18.9)  | 20,509 (11.3)         | 21,693 (24.7)          | 14,910 (19.6)  |
| 4                                                                             | 100,781 (11.4)         | 92,527 (17.8)  | 19,858 (10.6)         | 17,459 (22.0)          | 12,354 (18.6)  |
| 5 (most deprived)                                                             | 76,510 (10.7)          | 79,758 (17.2)  | 16,747 (10.0)         | 12,278 (19.8)          | 9,734 (17.8)   |

**Table S4:** continued .../

| <b>Duration/characteristic</b>                                                      | <b>Antidepressants</b> | <b>Opioids</b> | <b>Gabapentinoids</b> | <b>Benzodiazepines</b> | <b>Z-drugs</b> |
|-------------------------------------------------------------------------------------|------------------------|----------------|-----------------------|------------------------|----------------|
| <i>People estimated to have been in receipt of a prescription for 2 to 5 months</i> |                        |                |                       |                        |                |
| All                                                                                 | 893,279 (19.9)         | 424,851 (18.1) | 159,644 (18.7)        | 63,369 (15.1)          | 58,159 (16.0)  |
| Male <sup>¶</sup>                                                                   | 301,056 (20.2)         | 162,886 (18.6) | 60,800 (18.5)         | 23,457 (15.8)          | 23,217 (17.0)  |
| Female                                                                              | 591,409 (19.8)         | 261,839 (17.8) | 98,808 (18.8)         | 39,891 (14.8)          | 34,917 (15.4)  |
| <b>Age (years) <sup>§</sup></b>                                                     |                        |                |                       |                        |                |
| 18-24                                                                               | 73,072 (34.4)          | 5,833 (21.2)   | 2,690 (27.9)          | 1,655 (21.9)           | 1,400 (23.5)   |
| 25-44                                                                               | 281,666 (25.4)         | 63,054 (18.8)  | 30,018 (21.0)         | 14,333 (17.9)          | 12,141 (19.9)  |
| 45-64                                                                               | 341,784 (18.9)         | 156,077 (17.4) | 68,549 (18.4)         | 19,853 (14.1)          | 20,004 (15.2)  |
| 65-74                                                                               | 104,894 (15.3)         | 91,899 (17.8)  | 29,922 (18.3)         | 10,507 (13.3)          | 10,255 (14.6)  |
| 75 ≥                                                                                | 90,675 (13.7)          | 107,810 (19.1) | 28,422 (17.3)         | 16,997 (15.3)          | 14,325 (15.0)  |
| <b>IMD quintile <sup>†</sup></b>                                                    |                        |                |                       |                        |                |
| 1 (least deprived)                                                                  | 203,643 (21.2)         | 75,688 (18.9)  | 30,246 (20.3)         | 15,380 (16.3)          | 14,764 (17.2)  |
| 2                                                                                   | 201,559 (20.3)         | 86,957 (18.5)  | 32,929 (19.3)         | 15,282 (15.8)          | 13,369 (16.4)  |
| 3                                                                                   | 189,106 (20.3)         | 90,782 (18.4)  | 34,686 (19.1)         | 13,304 (15.2)          | 12,016 (15.8)  |
| 4                                                                                   | 171,058 (19.3)         | 91,868 (17.6)  | 33,658 (18.0)         | 11,140 (14.0)          | 9,963 (15.0)   |
| 5 (most deprived)                                                                   | 129,002 (18.0)         | 80,233 (17.3)  | 28,416 (17.0)         | 8,433 (13.6)           | 8,167 (14.9)   |

**Table S4:** continued.../

| <b>Duration/characteristic</b>                                                       | <b>Antidepressants</b> | <b>Opioids</b> | <b>Gabapentinoids</b> | <b>Benzodiazepines</b> | <b>Z-drugs</b> |
|--------------------------------------------------------------------------------------|------------------------|----------------|-----------------------|------------------------|----------------|
| <i>People estimated to have been in receipt of a prescription for 6 to 11 months</i> |                        |                |                       |                        |                |
| All                                                                                  | 726,645 (16.2)         | 299,995 (12.8) | 143,566 (16.8)        | 40,056 (9.5)           | 38,830 (10.7)  |
| Male <sup>¶</sup>                                                                    | 240,531 (16.1)         | 112,281 (12.9) | 54,417 (16.5)         | 14,722 (9.9)           | 15,162 (11.1)  |
| Female                                                                               | 485,993 (16.3)         | 187,683 (12.8) | 89,129 (17.0)         | 25,330 (9.4)           | 23,664 (10.4)  |
| <b>Age (years) <sup>§</sup></b>                                                      |                        |                |                       |                        |                |
| 18-24                                                                                | 42,965 (20.3)          | 2,839 (10.3)   | 1,967 (20.4)          | 774 (10.3)             | 495 (8.3)      |
| 25-44                                                                                | 208,821 (18.8)         | 40,510 (12.0)  | 25,629 (17.9)         | 7,844 (9.8)            | 6,883 (11.3)   |
| 45-64                                                                                | 286,485 (15.8)         | 110,415 (12.3) | 61,149 (16.4)         | 12,466 (8.8)           | 13,164 (10.0)  |
| 65-74                                                                                | 96,909 (14.1)          | 66,270 (12.8)  | 27,272 (16.6)         | 6,942 (8.8)            | 7,112 (10.1)   |
| 75 ≥                                                                                 | 91,366 (13.8)          | 79,934 (14.2)  | 27,535 (16.8)         | 12,027 (10.8)          | 11,175 (11.7)  |
| <b>IMD quintile <sup>†</sup></b>                                                     |                        |                |                       |                        |                |
| 1 (least deprived)                                                                   | 165,982 (17.3)         | 51,731 (12.9)  | 25,955 (17.4)         | 9,311 (9.8)            | 9,643 (11.2)   |
| 2                                                                                    | 164,069 (16.5)         | 60,935 (12.9)  | 29,468 (17.2)         | 9,276 (9.6)            | 8,819 (10.8)   |
| 3                                                                                    | 151,409 (16.3)         | 63,766 (12.9)  | 30,682 (16.9)         | 8,307 (9.5)            | 8,067 (10.6)   |
| 4                                                                                    | 139,280 (15.7)         | 66,192 (12.7)  | 30,850 (16.5)         | 7,591 (9.5)            | 6,797 (10.2)   |
| 5 (most deprived)                                                                    | 106,925 (14.9)         | 57,955 (12.5)  | 26,882 (16.1)         | 5,692 (9.2)            | 5,590 (10.2)   |

**Table S4:** continued .../

| <b>Duration/characteristic</b>                                                        | <b>Antidepressants</b> | <b>Opioids</b> | <b>Gabapentinoids</b> | <b>Benzodiazepines</b> | <b>Z-drugs</b> |
|---------------------------------------------------------------------------------------|------------------------|----------------|-----------------------|------------------------|----------------|
| <i>People estimated to have been in receipt of a prescription for 12 to 34 months</i> |                        |                |                       |                        |                |
| All                                                                                   | 1,244,978 (27.8)       | 551,812 (23.5) | 263,480 (30.8)        | 79,263 (18.9)          | 80,178 (22.0)  |
| Male ¶                                                                                | 413,304 (27.7)         | 200,620 (23.0) | 101,310 (30.8)        | 28,198 (18.9)          | 30,199 (22.1)  |
| Female                                                                                | 831,561 (27.8)         | 351,158 (23.9) | 162,146 (30.9)        | 51,059 (18.9)          | 49,973 (22.0)  |
| <i>Age (years) §</i>                                                                  |                        |                |                       |                        |                |
| 18-24                                                                                 | 42,285 (19.9)          | 3,554 (12.9)   | 2,500 (25.9)          | 792 (10.5)             | 516 (8.6)      |
| 25-44                                                                                 | 289,810 (26.1)         | 71,665 (21.3)  | 43,891 (30.6)         | 13,496 (16.8)          | 11,547 (18.9)  |
| 45-64                                                                                 | 509,524 (28.2)         | 208,781 (23.3) | 114,376 (30.7)        | 25,549 (18.1)          | 27,818 (21.2)  |
| 65-74                                                                                 | 198,186 (28.8)         | 123,381 (23.9) | 49,572 (30.2)         | 15,137 (19.2)          | 15,649 (22.3)  |
| 75 ≥                                                                                  | 205,098 (31.1)         | 144,404 (25.6) | 53,122 (32.4)         | 24,285 (21.8)          | 24,645 (25.9)  |
| <i>IMD quintile †</i>                                                                 |                        |                |                       |                        |                |
| 1 (least deprived)                                                                    | 263,694 (27.5)         | 90,329 (22.6)  | 44,227 (29.7)         | 16,811 (17.8)          | 18,749 (21.8)  |
| 2                                                                                     | 277,275 (27.9)         | 109,359 (23.2) | 52,089 (30.5)         | 18,237 (18.9)          | 18,090 (22.2)  |
| 3                                                                                     | 258,193 (27.7)         | 116,989 (23.7) | 55,743 (30.8)         | 16,807 (19.1)          | 16,874 (22.2)  |
| 4                                                                                     | 246,529 (27.8)         | 124,709 (23.9) | 58,571 (31.2)         | 15,298 (19.2)          | 14,625 (22.0)  |
| 5 (most deprived)                                                                     | 201,450 (28.1)         | 111,624 (24.1) | 53,494 (32.0)         | 12,336 (19.9)          | 12,022 (22.0)  |

**Table S4:** continued.../

| <b>Duration/characteristic</b>                                                     | <b>Antidepressants</b> | <b>Opioids</b> | <b>Gabapentinoids</b> | <b>Benzodiazepines</b> | <b>Z-drugs</b> |
|------------------------------------------------------------------------------------|------------------------|----------------|-----------------------|------------------------|----------------|
| <i>People estimated to have been in receipt of a prescription for 35-36 months</i> |                        |                |                       |                        |                |
| All                                                                                | 1,090,801 (24.3)       | 619,501 (26.4) | 192,022 (22.5)        | 132,283 (31.5)         | 114,025 (31.3) |
| Male <sup>¶</sup>                                                                  | 358,553 (24.1)         | 224,902 (25.7) | 77,353 (23.5)         | 45,430 (30.5)          | 40,427 (29.5)  |
| Female                                                                             | 732,106 (24.5)         | 394,533 (26.9) | 114,647 (21.8)        | 86,839 (32.2)          | 73,586 (32.4)  |
| <i>Age (years)<sup>§</sup></i>                                                     |                        |                |                       |                        |                |
| 18-24                                                                              | 8,640 (4.1)            | 1,361 (5.0)    | 643 (6.7)             | 251 (3.3)              | 147 (2.5)      |
| 25-44                                                                              | 158,482 (14.3)         | 68,906 (20.5)  | 24,867 (17.4)         | 14,667 (18.3)          | 11,503 (18.9)  |
| 45-64                                                                              | 472,209 (26.1)         | 260,528 (29.1) | 88,686 (23.8)         | 46,680 (33.1)          | 43,976 (33.5)  |
| 65-74                                                                              | 227,583 (33.1)         | 149,629 (28.9) | 39,258 (24.0)         | 30,198 (38.3)          | 25,805 (36.7)  |
| 75 ≥                                                                               | 223,755 (33.9)         | 139,013 (24.6) | 38,544 (23.5)         | 40,475 (36.3)          | 32,585 (34.2)  |
| <i>IMD quintile<sup>†</sup></i>                                                    |                        |                |                       |                        |                |
| 1 (least deprived)                                                                 | 206,590 (21.5)         | 94,574 (23.7)  | 29,871 (20.1)         | 25,110 (26.5)          | 23,834 (27.7)  |
| 2                                                                                  | 232,234 (23.4)         | 119,147 (25.3) | 36,652 (21.4)         | 28,494 (29.5)          | 24,353 (29.8)  |
| 3                                                                                  | 221,760 (23.8)         | 129,113 (26.1) | 39,607 (21.9)         | 27,698 (31.5)          | 24,152 (31.8)  |
| 4                                                                                  | 229,871 (25.9)         | 145,565 (27.9) | 44,505 (23.7)         | 28,004 (35.2)          | 22,776 (34.2)  |
| 5 (most deprived)                                                                  | 202,723 (28.3)         | 132,925 (28.7) | 41,853 (25.0)         | 23,372 (37.6)          | 19,236 (35.1)  |

IMD, Indicators of multiple deprivation

\* Includes individuals who did not have a dispensed prescription reported in March 2018 yet had one reported in the months either side. ¶ Analysis of sex excludes up to 0.1% of cases overall where sex was not available.

§ Analysis of age excludes up to 0.1% where no valid age record was available.

† Analysis from GP practice data and excludes cases where no IMD score was available.

Proportions are of the total (restricted by age, sex or IMD quintile as applicable) estimated to have a prescription in that month.

Appendix Figure S1. PRISMA flowchart of study selection

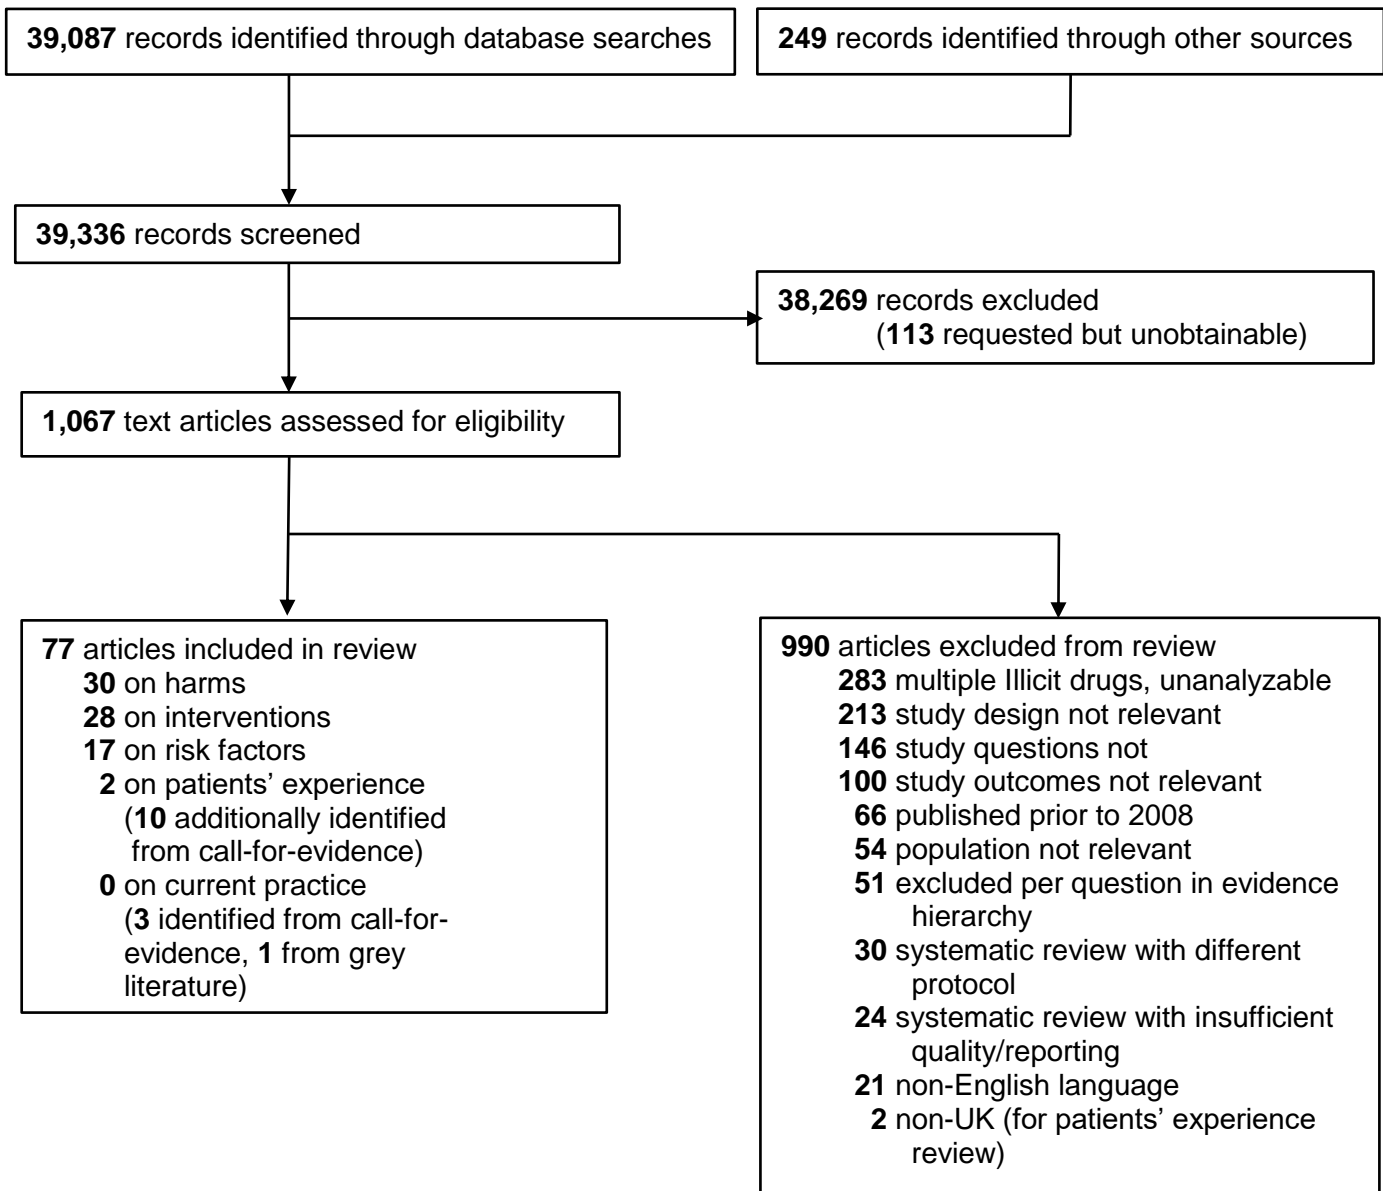



Appendix Figure S2. Deprivation by CCG registered populations, England (1 April 2017)

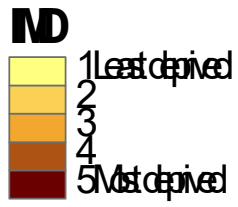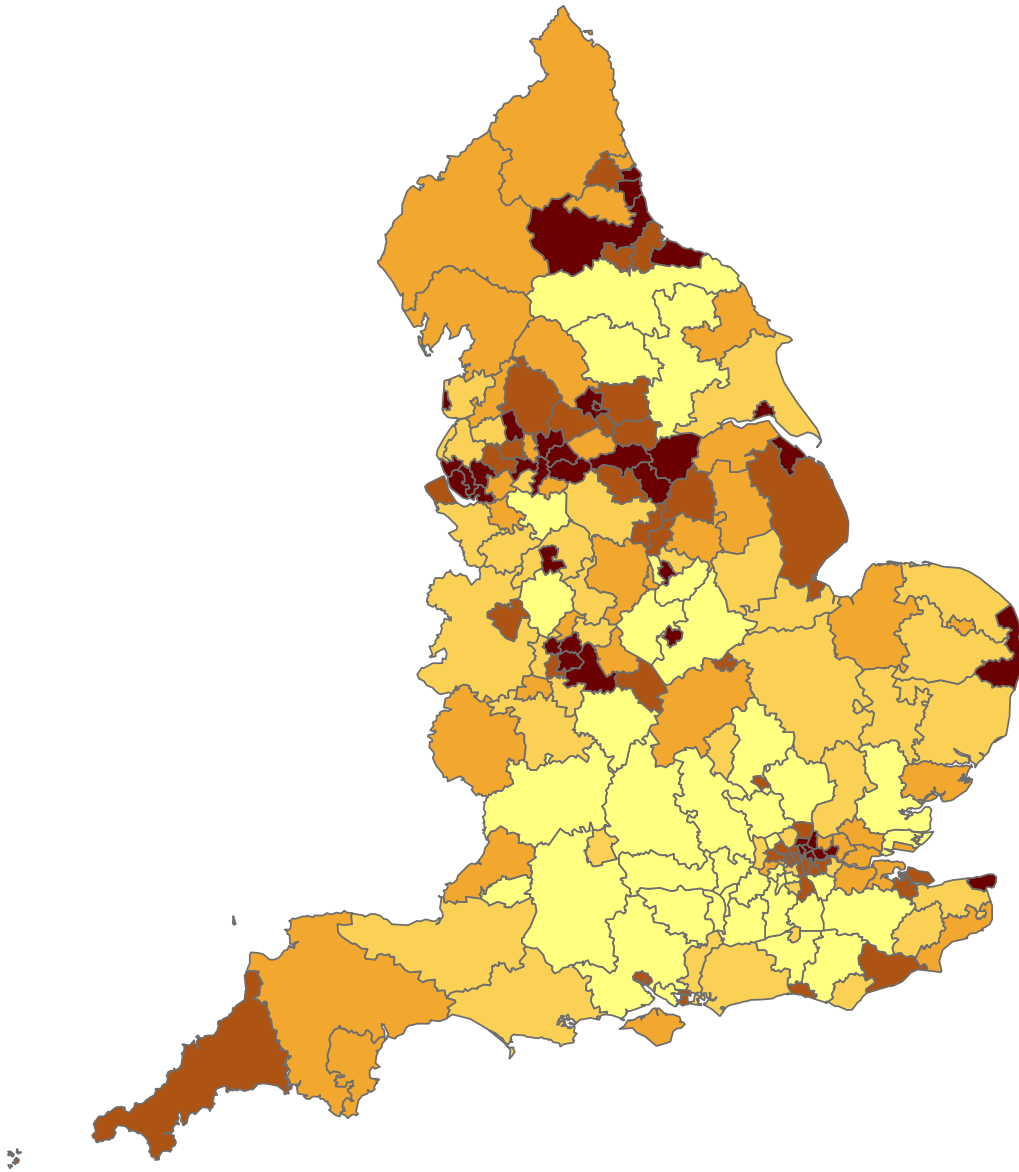

## Web-material from the REA

A master list of included studies for each section are shown at the end of this section (**W5, pages 84-100**).

### Appendix web-material W1. Withdrawal symptoms

#### Withdrawal symptoms

For antidepressants, 17 placebo RCTs with 6,729 participants reported withdrawal symptoms including: insomnia, depression, suicidal ideation, upper respiratory tract infection, vomiting, headache, and diarrhoea (evidence rated very-low, low or moderate-quality due to risk of selection bias, attrition, incomplete outcome data and imprecision, and unexplained heterogeneity). One study of desvenlafaxine and duloxetine [1] reported more cases of withdrawal symptoms associated with these medicines than placebo (relative risk 2.2; 95% CI 1.4 to 3.46; evidence rated as high quality).

Three RCTs compared antidepressant withdrawal regimens. In the first small study of 28 participants [2], three-day versus 14-days tapers showed no significant difference in score on the Discontinuation-Emergent Signs and Symptoms scale (DESS; evidence rated as very low quality due to selection bias, lack of blinding and imprecision). In the second [3], an RCT with 285 participants contrasted abrupt withdrawal with a one-week taper reporting that tapered withdrawal was associated with the number of taper/post-therapy emergent adverse events, although there was no difference in the total score on the DESS or in cases of nausea, dizziness, suicide ideation and suicide attempts (rated very-low quality evidence).

The third trial ([4]; n=384) evaluated abrupt withdrawal versus three different methods of tapering the withdrawal from desvenlafaxine. The results suggested no significant difference in DESS score at three-week follow-up after tapering, nor any differences in adverse events reported by 5% or more of the participants in any group (evidence rated as very low quality due to selection bias of selection bias and serious imprecision around the effect between abrupt tapering and tapering on alternate days for two weeks).

One observational study comprising 398 participants evaluated rapid (1-7 days) versus gradual antidepressant withdrawal (two-weeks or more). Results suggested a benefit for gradual withdrawal in reduced time to another depressive episode within one year (evidence rated as very low quality due to selection bias, deviations from intended interventions and risk of measurement bias). For chronic non-cancer pain, one RCT [5] comprising 615 participants evaluated a withdrawal taper with higher-dose pregabalin compared to lower-dose pregabalin and lorazepam (a benzodiazepine), indicating no difference between medicines in withdrawal symptoms

measured by the Physician Withdrawal Checklist [6] and the DESS. The evidence suggested that gabapentinoids were associated with less rebound insomnia after the taper (evidence rated as very low quality due to risk of selection bias, and high attrition rates causing outcome imprecision). For insomnia, a single study of 193 participants evaluated zolpidem compared to placebo [7]. There was no difference in rebound insomnia on days two and three of a medicine “run-out” (evidence rated as low-quality evidence due to imprecision demonstrated by wide confidence intervals around the effect) (**Table S4, section 1.1 page 89-107 for the GRADE profiles**).

### Interventions for prevention or treatment

Twenty-six RCTs and two non-randomised studies were identified; 12 for opioids, eight for benzodiazepines, three for antidepressants, one for Z-drugs and four reported on a range of interventions for treatment of dependence or withdrawal management. The descriptions of interventions varied considerably, and meta-analysis was not feasible, and therefore the results were reported un-pooled I GRADE profiles (**Table S4, section 1.3 page 151-191**).

### REFERENCES

1. Tourian KA, Padmanabhan SK, Groark J, Brisard C, Farrington D. Desvenlafaxine 50 and 100 mg/d in the treatment of major depressive disorder: an 8-week, phase III, multicenter, randomized, double-blind, placebo-controlled, parallel-group trial and a post hoc pooled analysis of three studies. *Clin Ther*. 2009; **31**: 1405–23.
2. Tint A, Haddad PM, Anderson IM. The effect of rate of antidepressant tapering on the incidence of discontinuation symptoms: a randomised study. [Erratum appears in *J Psychopharmacol*; 2009; **23**:1006]. *Journal of Psychopharmacology* 2008; **22**: 330–32.
3. Khan A, Musgnung J, Ramey T, Messig M, Buckley G, Ninan PT. Abrupt discontinuation compared with a 1-week taper regimen in depressed outpatients treated for 24 weeks with desvenlafaxine 50 mg/d. *J Clin Psychopharmacol*. 2014; **34**: 365–68.
4. Gallagher JC, Strzinek RA, Cheng RF, Ausmanas MK, Astl D, Seljan P. The effect of dose titration and dose tapering on the tolerability of desvenlafaxine in women with vasomotor symptoms associated with menopause. *J Womens Health* 2012; **21**:188–98.
5. Kasper S, Iglesias-Garcia C, Schweizer E, Wilson J, DuBrava S, Prieto R, et al. Pregabalin long-term treatment and assessment of discontinuation in patients with generalized anxiety disorder. *Int J Neuropsychopharmacol*. 2014;**17**: 685–95.
6. Rickels K, Garcia-Espana F, Mandos LA, Case GW. Physician Withdrawal Checklist (PWC-20). *J Clin Psychopharmacol*. 2008; **28**: 447–51.
7. Hajak G, Hedner J, Eglin M, Loft H, Storustovu SI, Lutolf S, et al. A 2-week efficacy and safety study of gaboxadol and zolpidem using electronic diaries in primary insomnia outpatients. *Sleep Med*; 2009; **10**: 705–12.

## Appendix web-material W2. Risk factors

Among the 17 studies on risk factors, two studies showed higher initial opioid dosing was associated with long-term use in one study (adjusted odds ratio [AOR] 95% CI) ranging from 4.01 (95% CI 2.23 to 10.57) to 6.25 (95% CI 2.91 to 13.42) [1]; n=791) and in the other [2], from 2.02 (95% CI 1.9 to 2.15) to 3.68 (95% CI 3.34 to 4.05); n=431,963).

One study ([3]; n=1,993) reported that opioid treatment for longer than 90 days was associated with opioid overdose (hazard ratio [HR] 5.12 (95% CI 1.63 to 6.08)) and OUD (HR 2.86 [95% CI 1.54 to 5.31]).

Three studies [4,5,] reported that prior or concurrent use of benzodiazepines, history of pregabalin use or increased number of prescribed analgesics, was associated with long-term opioid use (low or very-low quality evidence due to very serious risk of bias due to attrition and unclear outcome specification). Five studies [1,2,4,5,7] reported that a mental health diagnosis was a risk factor for OUD. Among the five benzodiazepine studies, two studies [8,9] reported that non-white ethnicity was associated with a lower risk of benzodiazepine use disorder (low-quality evidence due to unclear attrition, outcome and risk factor measurement).

The second study reported that lower income was associated with more benzodiazepines prescribed. Shorter-acting benzodiazepines were associated with greater risk of long-term use. Other risk factors studied either showed inconsistent results between studies (e.g. age and gender had results in both directions of effect) or demonstrated no association.

## REFERENCES

1. Franklin GM, Rahman EA, Turner JA, Daniell WE, Fulton-Kehoe D. Opioid use for chronic low back pain: A prospective, population-based study among injured workers in Washington state, 2002-2005. *Clin J Pain*; 2009; **25**: 743-51.
2. Lalic S, Gisev N, Bell JS, Korhonen MJ, Ilomaki J. Predictors of persistent prescription opioid analgesic use among people without cancer in Australia. *Br J Clin Pharmacol*. 2018; **84**: 1267-78.
3. Hoffman EM, Watson JC, St Sauver J, Staff NP, Klein CJ. Association of long-term opioid therapy with functional status, adverse outcomes, and mortality among patients with polyneuropathy. *JAMA Neurology* 2017; **74**: 773–79.
4. Boscarino JA, Rukstalis M, Hoffman SN, Han JJ, Erlich PM, Gerhard GS, et al. Risk factors for drug dependence among out-patients on opioid therapy in a large US health-care system. *Addiction* 2010; **105**: 1776–82.
5. Broekmans S, Dobbels F, Milisen K, Morlion B, Vanderschueren S. Determinants of medication underuse and medication overuse in patients with chronic non-malignant pain: A multicenter study. *Int J Nurs Stud*; 2010; **47**: 1408–17.
6. Cochran G, Rosen D, McCarthy RM, Engel RJ. Risk Factors for Symptoms of Prescription Opioid Misuse: Do Older Adults Differ from Younger Adult Patients? *Journal of Gerontological Social Work* 2017; **60**: 443–57.

7. Seal KH, Shi Y, Cohen G, Cohen BE, Maguen S, Krebs EE, et al. Association of mental health disorders with prescription opioids and high-risk opioid use in US veterans of Iraq and Afghanistan. *JAMA* 2012; **307**: 940–47.
8. Cochran G, Rosen D, McCarthy RM, Engel RJ. Risk Factors for Symptoms of Prescription Opioid Misuse: Do Older Adults Differ from Younger Adult Patients? *Journal of Gerontological Social Work*. 2017; **606**: 443–57.
9. Cook B, Creedon T, Wang Y, Lu C, Carson N, Jules P, et al. Examining racial/ethnic differences in patterns of benzodiazepine prescription and misuse. *Drug Alcohol Depend*. 2018; **187**: 29–34.

### Appendix web-material W3. Patients' experience

Twelve articles in peer-reviewed journals and other publicly available reports were identified through the literature search and the open-call (three qualitative studies; three reports; one NIHR Health Technology Assessment, and five analyses of online information).

We compiled cross-cutting and medicine-specific reports from patients about their experience of taking the medicines and their contact with medical professionals. Eleven of these reported on longer-term use of antidepressants, and one included both longer-term use of antidepressants and benzodiazepines. Table S5 summarises this thematically by harmful side-effects, medicine-attributed withdrawal symptoms following dose adjustment or cessation, and treatment services.

There was also a report on 26 patients who completed an open-ended questionnaire on several medicines [1] (evidence rated with high confidence). Most comments concerned benzodiazepines, citing harmful physical, affective, social and sexual side-effects. These patients voiced concerns about GP monitoring and cited barriers to accessing BUD treatment and support. (See Appendices S5, section 1.4 page 204-207 for GRADE CERQual profiles).

1. British Medical Association. Prescribed drugs associated with dependence and withdrawal – building a consensus for action. Analysis report. London. 2015. <https://www.drugsandalcohol.ie/24620/files/10/24620.html> (accessed 14.7.19)

### Appendix web-material W4. Service models and evaluations

Four reports were identified:

1. Barth KS, Ball S, Adams RS. Development and feasibility of an academic detailing intervention to improve prescription drug monitoring program use among physicians. *Journal of Continuing Education in the Health Professions*; 2017; **37**: 98–105.
2. Dann A. A novel approach to the identification, reduction and rationalisation of opiate prescribing. 2018. Royal College of General Practitioners. <http://www.rcgpac.org.uk/programme-overview/2018-app/> (accessed August 14, 2019).
3. Guy A, Davies J. An analysis of four current UK service models for prescribed medication withdrawal support. 2018. All-Party Parliamentary Group for Prescribed Drug Dependence. <http://www.prescribeddrug.org/wp-content/uploads/2018/11/APPG-Service-Model-Report.pdf>. (accessed August 14, 2019).

4. Scott L, Kesten J, Bache K, Collins R, Redwood S, Thomas K. South Gloucestershire Pain Review Pilot (SUPPORT) Study: A mixed-methods evaluation. UK, Public Health Science, Belfast. 2018. [www.ukpublichealthscience.org](http://www.ukpublichealthscience.org).

The non-comparative nature of all of the studies meant that differences between those using a service and those not using a service or using an alternative service could not be assessed.

#### **Appendix web-material W5. References for all REA included studies**

##### **Harms of dependence and withdrawal symptoms**

1. Cepeda MS, Fife D, Vo L, Mastrogiovanni G, Yuan Y. Comparison of opioid doctor shopping for tapentadol and oxycodone: a cohort study. *J Pain*. 2013;14(2):158-64.
2. Afilalo M, Etropolski MS, Kuperwasser B, Kelly K, Okamoto A, Van Hove I, et al. Efficacy and safety of Tapentadol extended release compared with oxycodone controlled release for the management of moderate to severe chronic pain related to osteoarthritis of the knee: a randomized, double-blind, placebo- and active-controlled phase III study. *Clin Drug Investig*. 2010;30(8):489-505.
3. Buynak R, Shapiro DY, Okamoto A, Van Hove I, Rauschkolb C, Steup A, et al. Efficacy and safety of tapentadol extended release for the management of chronic low back pain: results of a prospective, randomized, double-blind, placebo- and active-controlled Phase III study.[Erratum appears in *Expert Opin Pharmacother*. 2010 Nov;11(16):2773]. *Expert Opin Pharmacother*. 2010;11(11):1787-804.
4. Hale M, Upmalis D, Okamoto A, Lange C, Rauschkolb C. Tolerability of tapentadol immediate release in patients with lower back pain or osteoarthritis of the hip or knee over 90 days: a randomized, double-blind study. *Curr Med Res Opin*. 2009;25(5):1095-104.
5. Wild JE, Grond S, Kuperwasser B, Gilbert J, McCann B, Lange B, et al. Long-term safety and tolerability of tapentadol extended release for the management of chronic low back pain or osteoarthritis pain. *Pain Pract*. 2010;10(5):416-27.
6. Hajak G, Hedner J, Eglin M, Loft H, Storustovu SI, Lutolf S, et al. A 2-week efficacy and safety study of gaboxadol and zolpidem using electronic diaries in primary insomnia outpatients. *Sleep Med*. 2009;10(7):705-12.
7. Bourgeois J, Elseviers MM, Van Bortel L, Petrovic M, Vander Stichele RH. Feasibility of discontinuing chronic benzodiazepine use in nursing home residents: a pilot study. *Eur J Clin Pharmacol*. 2014;70(10):1251-60.
8. Kasper S, Iglesias-Garcia C, Schweizer E, Wilson J, DuBrava S, Prieto R, et al. Pregabalin long-term treatment and assessment of discontinuation in patients with generalized anxiety disorder. *Int J Neuropsychopharmacol*. 2014;17(5):685-95.
9. Boyer P, Montgomery S, Lepola U, Germain JM, Brisard C, Ganguly R, et al. Efficacy, safety, and tolerability of fixed-dose desvenlafaxine 50 and 100 mg/day for major depressive disorder in a placebo-controlled trial. *Int Clin Psychopharmacol*. 2008;23(5):243-53.
10. Cutler AJ, Montgomery SA, Feifel D, Lazarus A, Astrom M, Brecher M. Extended release quetiapine fumarate monotherapy in major depressive disorder: a placebo- and duloxetine-controlled study.[Erratum appears in *J Clin Psychiatry*. 2009 Dec;70(12):1729]. *J Clin Psychiatry*. 2009;70(4):526-39.

11. Krystal AD, Lankford A, Durrence HH, Ludington E, Jochelson P, Rogowski R, et al. Efficacy and safety of doxepin 3 and 6 mg in a 35-day sleep laboratory trial in adults with chronic primary insomnia. *Sleep*. 2011;34(10):1433-42.
12. Liebowitz MR, Manley AL, Padmanabhan SK, Ganguly R, Tummala R, Tourian KA. Efficacy, safety, and tolerability of desvenlafaxine 50 mg/day and 100 mg/day in outpatients with major depressive disorder. *Curr Med Res Opin*. 2008;24(7):1877-90.
13. Liebowitz MR, Asnis G, Mangano R, Tzanis E. A double-blind, placebo-controlled, parallel-group, flexible-dose study of venlafaxine extended release capsules in adult outpatients with panic disorder. *J Clin Psychiatry*. 2009;70(4):550-61.
14. Mahabeshwarkar AR, Jacobsen PL, Chen Y, Serenko M, Trivedi MH. A randomized, double-blind, duloxetine-referenced study comparing efficacy and tolerability of 2 fixed doses of vortioxetine in the acute treatment of adults with MDD. *Psychopharmacology (Berl)*. 2015;232(12):2061-70.
15. Nishimura A, Aritomi Y, Sasai K, Kitagawa T, Mahabeshwarkar AR. Randomized, double-blind, placebo-controlled 8-week trial of the efficacy, safety, and tolerability of 5, 10, and 20 mg/day vortioxetine in adults with major depressive disorder. *Psychiatry Clin Neurosci*. 2018;72(2):64-72.
16. Perahia DG, Maina G, Thase ME, Spann ME, Wang F, Walker DJ, et al. Duloxetine in the prevention of depressive recurrences: a randomized, double-blind, placebo-controlled trial.[Erratum appears in *J Clin Psychiatry*. 2009 Dec;70(12):1729]. *J Clin Psychiatry*. 2009;70(5):706-16.
17. Raskin J, Wiltse CG, Dinkel JJ, Walker DJ, Desaiyah D, Katona C. Safety and tolerability of duloxetine at 60 mg once daily in elderly patients with major depressive disorder. *J Clin Psychopharmacol*. 2008;28(1):32-8.
18. Rickels K, Montgomery SA, Tourian KA, Guelfi JD, Pitrosky B, Padmanabhan SK, et al. Desvenlafaxine for the prevention of relapse in major depressive disorder: results of a randomized trial. *J Clin Psychopharmacol*. 2010;30(1):18-24.
19. Rosenthal JZ, Boyer P, Vialet C, Hwang E, Tourian KA. Efficacy and safety of desvenlafaxine 50 mg/d for prevention of relapse in major depressive disorder: a randomized controlled trial. *J Clin Psychiatry*. 2013;74(2):158-66.
20. Rynn M, Russell J, Erickson J, Detke MJ, Ball S, Dinkel J, et al. Efficacy and safety of duloxetine in the treatment of generalized anxiety disorder: a flexible-dose, progressive-titration, placebo-controlled trial. *Depress Anxiety*. 2008;25(3):182-9.
21. Schagen van Leeuwen JH, Lange RR, Jonasson AF, Chen WJ, Viktrup L. Efficacy and safety of duloxetine in elderly women with stress urinary incontinence or stress-predominant mixed urinary incontinence. *Maturitas*. 2008;60(2):138-47.
22. Stein DJ, Ahokas A, Albarran C, Olivier V, Allgulander C. Agomelatine prevents relapse in generalized anxiety disorder: a 6-month randomized, double-blind, placebo-controlled discontinuation study. *J Clin Psychiatry*. 2012;73(7):1002-8.
23. Tourian KA, Padmanabhan SK, Groark J, Brisard C, Farrington D. Desvenlafaxine 50 and 100 mg/d in the treatment of major depressive disorder: an 8-week, phase III, multicenter, randomized, double-blind, placebo-controlled, parallel-group trial and a post hoc pooled analysis of three studies. *Clin Ther*. 2009;31 Pt 1:1405-23.
24. YaDeau JT, Brummett CM, Mayman DJ, Lin Y, Goytizolo EA, Padgett DE, et al. Duloxetine and Subacute Pain after Knee Arthroplasty when Added to a Multimodal Analgesic Regimen: A Randomized, Placebo-controlled, Triple-blinded Trial. *Anesthesiology*. 2016;125(3):561-72.

25. Yonkers KA, Kornstein SG, Gueorguieva R, Merry B, Van Steenburgh K, Altemus M. Symptom-Onset Dosing of Sertraline for the Treatment of Premenstrual Dysphoric Disorder: A Randomized Clinical Trial. *JAMA psychiatry*. 2015;72(10):1037-44.
26. Hoffman EM, Watson JC, St Sauver J, Staff NP, Klein CJ. Association of long-term opioid therapy with functional status, adverse outcomes, and mortality among patients with polyneuropathy. *JAMA Neurology*. 2017;74(7):773-9.
27. Baldessarini RJ, Tondo L, Ghiani C, Lepri B. Illness risk following rapid versus gradual discontinuation of antidepressants. *The American Journal of Psychiatry*. 2010;167(8):934-41.
28. Gallagher JC, Strzinek RA, Cheng RF, Ausmanas MK, Astl D, Seljan P. The effect of dose titration and dose tapering on the tolerability of desvenlafaxine in women with vasomotor symptoms associated with menopause. *J Womens Health*. 2012;21(2):188-98.
29. Khan A, Musgnung J, Ramey T, Messig M, Buckley G, Ninan PT. Abrupt discontinuation compared with a 1-week taper regimen in depressed outpatients treated for 24 weeks with desvenlafaxine 50 mg/d. *J Clin Psychopharmacol*. 2014;34(3):365-8.
30. Tint A, Haddad PM, Anderson IM. The effect of rate of antidepressant tapering on the incidence of discontinuation symptoms: a randomised study.[Erratum appears in *J Psychopharmacol*. 2009 Nov;23(8):1006]. *Journal of Psychopharmacology*. 2008;22(3):330-2.

### **Risk factors**

1. Boscarino JA, Rukstalis MR, Hoffman SN, Han JJ, Erlich PM, Ross S, et al. Prevalence of prescription opioid-use disorder among chronic pain patients: Comparison of the DSM-5 vs. DSM-4 diagnostic criteria. *J Addict Dis*. 2011;30(3):185-94.
2. Boscarino JA, Rukstalis M, Hoffman SN, Han JJ, Erlich PM, Gerhard GS, et al. Risk factors for drug dependence among out-patients on opioid therapy in a large US health-care system. *Addiction*. 2010;105(10):1776-82.
3. Broekmans S, Dobbels F, Milisen K, Morlion B, Vanderschueren S. Determinants of medication underuse and medication overuse in patients with chronic non-malignant pain: A multicenter study. *Int J Nurs Stud*. 2010;47(11):1408-17.
4. Cochran G, Rosen D, McCarthy RM, Engel RJ. Risk Factors for Symptoms of Prescription Opioid Misuse: Do Older Adults Differ from Younger Adult Patients? *Journal of Gerontological Social Work*. 2017;60(6-7):443-57.
5. Cochran G, McCarthy R, Gordon AJ, Tarter RE. Opioid medication misuse among unhealthy drinkers. *Drug Alcohol Depend*. 2017;179:13.
6. Franklin GM, Rahman EA, Turner JA, Daniell WE, Fulton-Kehoe D. Opioid use for chronic low back pain: A prospective, population-based study among injured workers in Washington state, 2002-2005. *Clin J Pain*. 2009;25(9):743-51.
7. Hoffman EM, Watson JC, St Sauver J, Staff NP, Klein CJ. Association of long-term opioid therapy with functional status, adverse outcomes, and mortality among patients with polyneuropathy. *JAMA Neurology*. 2017;74(7):773-9.
8. Lalic S, Gisev N, Bell JS, Korhonen MJ, Ilomaki J. Predictors of persistent prescription opioid analgesic use among people without cancer in Australia. *Br J Clin Pharmacol*. 2018;84(6):1267-78.
9. Morasco BJ, Dobscha SK. Prescription medication misuse and substance use disorder in VA primary care patients with chronic pain. *Gen Hosp Psychiatry*. 2008;30(2):93-9.



10. Morasco BJ, Turk DC, Donovan DM, Dobscha SK. Risk for prescription opioid misuse among patients with a history of substance use disorder. *Drug Alcohol Depend.* 2013;127(1-3):193-9.
11. Robinson-Papp J, Elliott K, Simpson DM, Morgello S. Problematic prescription opioid use in an HIV-infected cohort: the importance of universal toxicology testing. *J Acquir Immune Defic Syndr.* 2012;61(2):187-93.
12. Seal KH, Shi Y, Cohen G, Cohen BE, Maguen S, Krebs EE, et al. Association of mental health disorders with prescription opioids and high-risk opioid use in US veterans of Iraq and Afghanistan. *JAMA.* 2012;307(9):940-7.
13. Cook B, Creedon T, Wang Y, Lu C, Carson N, Jules P, et al. Examining racial/ethnic differences in patterns of benzodiazepine prescription and misuse. *Drug Alcohol Depend.* 2018;187:29.
14. Fang SY, Chen CY, Chang IS, Wu ECH, Chang CM, Lin KM. Predictors of the incidence and discontinuation of long-term use of benzodiazepines: A population-based study. *Drug Alcohol Depend.* 2009;104(1-2):140-6.
15. Morgan SG, Weymann D. Patterns, predictors and persistence of chronic sedative use: a population-based observational study of older adults in British Columbia, Canada. *Eur J Clin Pharmacol.* 2017;73(8):1001-8.
16. Voyer P, Preville M, Roussel ME, Berbiche D, Beland SG. Factors associated with benzodiazepine dependence among community-dwelling seniors. *J Community Health Nurs.* 2009;26(3):101-13.
17. Voyer P, Preville M, Martin LS, Roussel M-E, Beland S-G, Berbiche D. Factors Associated with Self-Rated Benzodiazepine Addiction among Community-Dwelling Seniors. *J Addict Nurs.* 2011;22(1-2):46-56.

### **Interventions for prevention or treatment**

(NB. 4 studies were reported in 2 separate papers)

1. Chu LF, Rico T, Cornell E, Obasi H, Encisco EM, Vertelney H, et al. Ondansetron does not prevent physical dependence in patients taking opioid medications chronically for pain control. *Drug Alcohol Depend.* 2018;183:176-83.
2. Chu LF, Sun J, Clemenson A, Erlendson MJ, Rico T, Cornell E, et al. Ondansetron Does Not Reduce Withdrawal in Patients With Physical Dependence on Chronic Opioid Therapy. *J Addict Med.* 2017;11(5):342-9.
3. Doctor JN, Nguyen A, Lev R, Lucas J, Knight T, Zhao H, et al. Opioid prescribing decreases after learning of a patient's fatal overdose. *Science.* 2018;361(6402):588-90.
4. Garland EL, Manusov EG, Froeliger B, Kelly A, Williams JM, Howard MO. Mindfulness-oriented recovery enhancement for chronic pain and prescription opioid misuse: results from an early-stage randomized controlled trial. *J Consult Clin Psychol.* 2014;82(3):448-59. doi: 10.1037/a0035798. Epub 2014 Feb 3.
5. Hooten WM, Warner DO. Varenicline for opioid withdrawal in patients with chronic pain: a randomized, single-blinded, placebo controlled pilot trial. *Addict Behav.* 2015;42:69-72.
6. Jamison RN, Ross EL, Michna E, Chen LQ, Holcomb C, Wasan AD. Substance misuse treatment for high-risk chronic pain patients on opioid therapy: a randomized trial. *Pain.* 2010;150(3):390-400. doi: 10.1016/j.pain.2010.02.033. Epub Mar 23.

7. Kurita GP, Hojsted J, Sjogren P. Tapering off long-term opioid therapy in chronic non-cancer pain patients: A randomized clinical trial. *European Journal of Pain (United Kingdom)*. 2018;22(8):1528-43.
8. Liebschutz JM, Xuan Z, Shanahan CW, LaRochelle M, Keosaian J, Beers D, et al. Improving Adherence to Long-term Opioid Therapy Guidelines to Reduce Opioid Misuse in Primary Care: A Cluster-Randomized Clinical Trial. *JAMA Intern Med*. 2017;177(9):1265-72.
9. McCracken LM, Boichat C, Eccleston C. Training for general practitioners in opioid prescribing for chronic pain based on practice guidelines: a randomized pilot and feasibility trial. *J Pain*. 2012;13(1):32-40.
10. Pasquale MK, Sheer RL, Mardekian J, Masters ET, Patel NC, Hurwitch AR, et al. Educational intervention for physicians to address the risk of opioid abuse. *Journal of Opioid Management*. 2017;13(5):303-13.
11. Sullivan MD, Turner JA, DiLodovico C, D'Appollonio A, Stephens K, Chan YF. Prescription Opioid Taper Support for Outpatients With Chronic Pain: A Randomized Controlled Trial. *J Pain*. 2017;18(3):308-18. doi: 10.1016/j.jpain.2016.11.003. Epub Nov 28.
12. Wilson M, Roll JM, Corbett C, Barbosa-Leiker C. Empowering Patients with Persistent Pain Using an Internet-based Self-Management Program. *Pain Manag Nurs*. 2015;16(4):503-14.
13. Garzon C, Guerrero JM, Aramburu O, Guzman T. Effect of melatonin administration on sleep, behavioral disorders and hypnotic drug discontinuation in the elderly: a randomized, double-blind, placebo-controlled study. *Aging Clin Exp Res*. 2009;21(1):38-42.
14. Lahteenmaki R, Puustinen J, Vahlberg T, Lyles A, Neuvonen PJ, Partinen M, et al. Melatonin for sedative withdrawal in older patients with primary insomnia: a randomized double-blind placebo-controlled trial. *Br J Clin Pharmacol*. 2014;77(6):975-85.
15. O'Connor K, Marchand A, Brousseau L, Aardema F, Mainguy N, Landry P, et al. Cognitive-behavioural, pharmacological and psychosocial predictors of outcome during tapered discontinuation of benzodiazepine. *Clin Psychol Psychother*. 2008;15(1):1-14.
16. Parr JM, Kavanagh DJ, Young RM, Stubbs B, Bradizza N. Impact of Cognitive Behaviour Therapy Via Mail for Cessation of Benzodiazepine Use: A Series of Case Reports. *Behaviour Change*. 2013;30(2):74-83.
17. Tannenbaum C, Martin P, Tamblyn R, Benedetti A, Ahmed S. Reduction of inappropriate benzodiazepine prescriptions among older adults through direct patient education: the EMPOWER cluster randomized trial. *JAMA Intern Med*. 2014;174(6):890-8.
18. Ten Wolde GB, Dijkstra A, van Empelen P, van den Hout W, Neven AK, Zitman F. Long-term effectiveness of computer-generated tailored patient education on benzodiazepines: a randomized controlled trial. *Addiction*. 2008;103(4):662-70.
19. van de Steeg-van Gompel CH, Wensing M, De Smet PA. Implementation of a discontinuation letter to reduce long-term benzodiazepine use--a cluster randomized trial. *Drug Alcohol Depend*. 2009;99(1-3):105-14.
20. Vicens C, Bejarano F, Sempere E, Mateu C, Fiol F, Socias I, et al. Comparative efficacy of two interventions to discontinue long-term benzodiazepine use: cluster randomised controlled trial in primary care. *Br J Psychiatry*. 2014;204(6):471-9.
21. Vicens C, Sempere E, Bejarano F, Socias I, Mateu C, Fiol F, et al. Efficacy of two interventions on the discontinuation of benzodiazepines in long-term users: 36-month follow-up of a cluster randomised trial in primary care. *Br J Gen Pract*. 2016;66(643):e85-91.
22. Bergdahl L, Broman JE, Berman AH, Haglund K, von Knorring L, Markstrom A. Auricular acupuncture versus cognitive behavioural therapy in the discontinuation of hypnotic drug usage,

and treatment effects on anxiety, depression and insomnia symptoms - a randomised controlled study. *European Journal of Integrative Medicine*. 2017;16:15-21.

23. Bergdahl L, Broman JE, Berman AH, Haglund K, von Knorring L, Markström A. Auricular Acupuncture and Cognitive Behavioural Therapy for Insomnia: A Randomised Controlled Study. *Sleep disorders*. 2016;2016:7057282-.
24. Eveleigh R, Grutters J, Muskens E, Oude Voshaar R, van Weel C, Speckens A, et al. Cost-utility analysis of a treatment advice to discontinue inappropriate long-term antidepressant use in primary care. *Fam Pract*. 2014;31(5):578-84.
25. Eveleigh R, Muskens E, Lucassen P, Verhaak P, Spijker J, van Weel C, et al. Withdrawal of unnecessary antidepressant medication: a randomised controlled trial in primary care. *BJGP Open*. 2018;1(4):bjgpopen17X101265.
26. Groot PC, van Os J. Antidepressant tapering strips to help people come off medication more safely. *Psychosis*. 2018;10(2):142-5.
27. Johnson CF, Macdonald HJ, Atkinson P, Buchanan AI, Downes N, Dougall N. Reviewing long-term antidepressants can reduce drug burden: a prospective observational cohort study. *Br J Gen Pract*. 2012;62(604):e773-9.
28. Naylor MR, Keefe FJ, Brigidi B, Naud S, Helzer JE. Therapeutic Interactive Voice Response for chronic pain reduction and relapse prevention. *Pain*. 2008;134(3):335-45. doi: 10.1016/j.pain.2007.11.001. Epub 8 Jan 4.
29. Naylor MR, Naud S, Keefe FJ, Helzer JE. Therapeutic Interactive Voice Response (TIVR) to reduce analgesic medication use for chronic pain management. *J Pain*. 2010;11(12):1410-9. doi: 10.016/j.jpain.2010.03.019.
30. Quanbeck A, Brown RT, Zgierska AE, Jacobson N, Robinson JM, Johnson RA, et al. A randomized matched-pairs study of feasibility, acceptability, and effectiveness of systems consultation: a novel implementation strategy for adopting clinical guidelines for Opioid prescribing in primary care. *Implement Sci*. 2018;13(1):21.
31. Salonoja M, Salminen M, Aarnio P, Vahlberg T, Kivela SL. One-time counselling decreases the use of benzodiazepines and related drugs among community-dwelling older persons. *Age Ageing*. 2010;39(3):313-9.
32. Zahradnik A, Otto C, Crackau B, Lohrmann I, Bischof G, John U, et al. Randomized controlled trial of a brief intervention for problematic prescription drug use in non-treatment-seeking patients. *Addiction*. 2009;104(1):109-17.

## **Patient's Experience**

1. Avery AJ, Anderson C, Bond CM, Fortnum H, Gifford A, Hannaford PC, et al. Evaluation of patient reporting of adverse drug reactions to the UK 'Yellow Card Scheme': literature review, descriptive and qualitative analyses, and questionnaire surveys. *Health Technology Assessment (Winchester, England)*. 2011;15(20):1-234, iii-iv.
2. Bayliss P, Holttum S. Experiences of antidepressant medication and cognitive-behavioural therapy for depression: a grounded theory study. *Psychol Psychother*. 2015;88(3):317-34.
3. Belaise C, Gatti A, Chouinard V-A, Chouinard G. Patient online report of selective serotonin reuptake inhibitor-induced persistent postwithdrawal anxiety and mood disorders. *Psychother Psychosom*. 2012;81(6):386-8.
4. British Medical Association. Prescribed drugs associated with dependence and withdrawal – building a consensus for action. Analysis report. Evidence resource. London: British Medical Association, 2015/10//. Report No.

5. Davies J, Pauli R, Montagu L, Lindsay RP, Raymond-Barker B. Antidepressant withdrawal: a survey of patients' experience by the All-Party Parliamentary Group for Prescribed Drug Dependence. 2018.
6. Dickinson R, Knapp P, House AO, Dimri V, Zermansky A, Petty D, et al. Long-term prescribing of antidepressants in the older population: a qualitative study. *Br J Gen Pract.* 2010;60(573):e144-55.
7. Guy A, Brown M, Lewis S, Reid S, Epsley K, Cope D, et al. The Patient Voice: an analysis of personal accounts of prescribed drug dependence and withdrawal submitted to petitions in Scotland and Wales. 2018.
8. Pestello FG, Davis-Berman J. Taking anti-depressant medication: A qualitative examination of internet postings. *Journal of Mental Health.* 2008;17(4):349-60.
9. Read J, Gee A, Diggle J, Butler H. The interpersonal adverse effects reported by 1008 users of antidepressants; and the incremental impact of polypharmacy. *Psychiatry Res.* 2017;256:423-7.
10. Read J, Gee A, Diggle J, Butler H. Staying on, and coming off, antidepressants: The experiences of 752 UK adults. *Addict Behav.* 2019;88:82-5.
11. Schofield P, Crosland A, Waheed W, Waquas A, Aseem S, Gask L, et al. Patients' views of antidepressants: from first experiences to becoming expert. *Br J Gen Pract.* 2011;61(585):142-8.
12. Stockmann T, Odegbare D, Timimi S, Moncrieff J. SSRI and SNRI withdrawal symptoms reported on an internet forum. *Int J Risk Saf Med.* 2018;29(3-4):175-80.

### **Current service examples**

1. Barth KS, Ball S, Adams RS. Development and feasibility of an academic detailing intervention to improve prescription drug monitoring program use among physicians. *J Contin Educ Health Prof.* 2017;37(2):98-105.
2. Dann A. A novel approach to the identification, reduction and rationalisation of opiate prescribing. Royal College of General Practitioners,, 2018.
3. Guy A, Davies J. An analysis of four current UK service models for prescribed medication withdrawal support. APPG for Prescribed Drug Dependence, 2018.
4. Scott L, Kesten J, Bache K, Collins R, Redwood S, Thomas K. South Gloucestershire Pain Review Pilot (SUPPORT) Study: A mixed-methods evaluation. Belfast: 2018 23/11/2018. Report No.

## Appendix Table S5: GRADE and GRADE CERQual profiles

## 1.1 Harms of dependency, withdrawal and discontinuation

## 1.1.1 Harms of dependency on a medication

Table 1: Evidence profile: Tapentadol vs oxycodone

| Quality assessment                                                                                   |                       |                           |                          |                      |                        |                      | No of patients  |           | Effect                                                                |                                            | Quality          | Importance |
|------------------------------------------------------------------------------------------------------|-----------------------|---------------------------|--------------------------|----------------------|------------------------|----------------------|-----------------|-----------|-----------------------------------------------------------------------|--------------------------------------------|------------------|------------|
| No of studies                                                                                        | Design                | Risk of bias              | Inconsistency            | Indirectness         | Imprecision            | Other considerations | Tapentadol      | Oxycodone | Relative (95% CI)                                                     | Absolute                                   |                  |            |
| <b>Developed shopping behaviour (follow-up 1 years)</b>                                              |                       |                           |                          |                      |                        |                      |                 |           |                                                                       |                                            |                  |            |
| 1                                                                                                    | observational studies | very serious <sup>1</sup> | no serious inconsistency | serious <sup>2</sup> | no serious imprecision | none                 | 88/42940 (0.2%) | 0.9%      | RR 0.24 (0.19 to 0.3)<br>Adjusted OR <sup>3</sup> : 3.5 (2.84 to 4.4) | 7 fewer per 1000 (from 6 fewer to 7 fewer) | ⊕000<br>VERY LOW | CRITICAL   |
| <b>Number of shopping episodes per subject (follow-up 1 years; Better indicated by lower values)</b> |                       |                           |                          |                      |                        |                      |                 |           |                                                                       |                                            |                  |            |
| 1                                                                                                    | observational studies | very serious <sup>1</sup> | no serious inconsistency | serious <sup>2</sup> | no serious imprecision | none                 | 42940           | 112821    | -                                                                     | MD 0.02 lower (0.02 to 0.01 lower)         | ⊕000<br>VERY LOW | CRITICAL   |

<sup>1</sup> Downgraded by 1 increment if the majority of the evidence was at high risk of bias and downgraded by 2 increments if the majority of the evidence was at very high risk of bias.

<sup>2</sup> The majority of the evidence included an indirect population (downgrade by one increment)

<sup>3</sup> Adjusted odds ratio – controlling for gender, benzodiazepine use and type of payment at first opioid exposure using a conditional logistic regression.

### 1.1.2 Harms / side effects from stopping these medications over a short time frame

**Table 2: Evidence profile: Opioids versus control**

| Quality assessment                                                                                                        |                   |                      |                           |                         |                           |                      | No of patients  |         | Effect                  |                                                 | Quality          | Importance |
|---------------------------------------------------------------------------------------------------------------------------|-------------------|----------------------|---------------------------|-------------------------|---------------------------|----------------------|-----------------|---------|-------------------------|-------------------------------------------------|------------------|------------|
| No of studies                                                                                                             | Design            | Risk of bias         | Inconsistency             | Indirectness            | Imprecision               | Other considerations | Opioids         | Control | Relative (95% CI)       | Absolute                                        |                  |            |
| <b>Opioid vs control - no opioid withdrawal - COWS assessment 2-4 days after last intake of medication</b>                |                   |                      |                           |                         |                           |                      |                 |         |                         |                                                 |                  |            |
| 1                                                                                                                         | randomised trials | serious <sup>1</sup> | no serious inconsistency  | no serious indirectness | no serious imprecision    | none                 | 61/72 (84.7%)   | 100%    | RR 0.87 (0.77 to 0.99)  | 130 fewer per 1000 (from 10 fewer to 230 fewer) | ⊕⊕⊕O<br>MODERATE | CRITICAL   |
| <b>Opioid vs control - no opioid withdrawal - COWS assessment at 4 days after last intake of medication</b>               |                   |                      |                           |                         |                           |                      |                 |         |                         |                                                 |                  |            |
| 1                                                                                                                         | randomised trials | serious <sup>1</sup> | no serious inconsistency  | no serious indirectness | no serious imprecision    | none                 | 141/152 (92.8%) | 89.8%   | RR 1.04 (0.94 to 1.14)  | 36 more per 1000 (from 54 fewer to 126 more)    | ⊕⊕⊕O<br>MODERATE | CRITICAL   |
| <b>Opioid vs control - no opioid withdrawal - COWS assessment 5+ days after last intake of medication</b>                 |                   |                      |                           |                         |                           |                      |                 |         |                         |                                                 |                  |            |
| 1                                                                                                                         | randomised trials | serious <sup>1</sup> | no serious inconsistency  | no serious indirectness | no serious imprecision    | none                 | 141/154 (91.6%) | 91.6%   | RR 1 (0.92 to 1.1)      | 0 fewer per 1000 (from 73 fewer to 92 more)     | ⊕⊕⊕O<br>MODERATE |            |
| <b>Opioid vs control - mild or moderate opioid withdrawal - COWS assessment 2-4 days after last intake of medication</b>  |                   |                      |                           |                         |                           |                      |                 |         |                         |                                                 |                  |            |
| 1                                                                                                                         | randomised trials | serious <sup>1</sup> | no serious inconsistency  | no serious indirectness | very serious <sup>2</sup> | none                 | 11/72 (15.3%)   | 0%      | RR 4.04 (0.55 to 29.59) | 150 more per 1000 (from 40 more to 270 more)    | ⊕OOO<br>VERY LOW | CRITICAL   |
| <b>Opioid vs control - mild or moderate opioid withdrawal - COWS assessment at 4 days after last intake of medication</b> |                   |                      |                           |                         |                           |                      |                 |         |                         |                                                 |                  |            |
| 1                                                                                                                         | randomised trials | serious <sup>1</sup> | no serious inconsistency  | no serious indirectness | very serious <sup>2</sup> | none                 | 11/152 (7.2%)   | 10.2%   | RR 0.69 (0.26 to 1.82)  | 32 fewer per 1000 (from 75 fewer to 82 more)    | ⊕OOO<br>VERY LOW | CRITICAL   |
| <b>Opioid vs control - mild or moderate opioid withdrawal - COWS assessment 5+ days after last intake of medication</b>   |                   |                      |                           |                         |                           |                      |                 |         |                         |                                                 |                  |            |
| 1                                                                                                                         | randomised trials | serious <sup>1</sup> | very serious <sup>3</sup> | no serious indirectness | very serious <sup>2</sup> | none                 | 13/154 (8.4%)   | 8.5%    | RR 0.63 (0.05 to 8.48)  | 31 fewer per 1000 (from 81 fewer to 636 more)   | ⊕OOO<br>VERY LOW | CRITICAL   |

1 Downgraded by 1 increment if the majority of the evidence was at high risk of bias and downgraded by 2 increments if the majority of the evidence was at very high risk of bias.

2 Downgraded by 1 increment if the confidence interval crossed one MID or by 2 increments if the confidence interval crossed both MIDs.

3 Downgraded by 1 or 2 increments because of heterogeneity,  $I^2=75%$ ,  $p=0.05$ .

Table 3: Evidence profile: Opioid versus opioid

| Quality assessment                                                                                                             |                   |                           |                           |                         |                           |                      | No of patients  |         | Effect                 |                                                 | Quality          | Importance |
|--------------------------------------------------------------------------------------------------------------------------------|-------------------|---------------------------|---------------------------|-------------------------|---------------------------|----------------------|-----------------|---------|------------------------|-------------------------------------------------|------------------|------------|
| No of studies                                                                                                                  | Design            | Risk of bias              | Inconsistency             | Indirectness            | Imprecision               | Other considerations | Opioids         | Control | Relative (95% CI)      | Absolute                                        |                  |            |
| <b>Withdrawal syndrome</b>                                                                                                     |                   |                           |                           |                         |                           |                      |                 |         |                        |                                                 |                  |            |
| 1                                                                                                                              | randomised trials | very serious <sup>1</sup> | no serious inconsistency  | no serious indirectness | very serious <sup>2</sup> | none                 | 13/894 (1.5%)   | 0.9%    | RR 1.62 (0.37 to 7.13) | 6 more per 1000 (from 6 fewer to 55 more)       | ⊕○○○<br>VERY LOW | CRITICAL   |
| <b>Tapentadol vs oxycodone - no opioid withdrawal - COWS assessment 2-4 days after last intake of medication</b>               |                   |                           |                           |                         |                           |                      |                 |         |                        |                                                 |                  |            |
| 2                                                                                                                              | randomised trials | serious <sup>1</sup>      | no serious inconsistency  | no serious indirectness | no serious imprecision    | none                 | 126/160 (78.8%) | 79.6%   | RR 1.01 (0.85 to 1.19) | 8 more per 1000 (from 119 fewer to 151 more)    | ⊕⊕⊕○<br>MODERATE |            |
| <b>Tapentadol vs oxycodone - no opioid withdrawal - COWS assessment at 4 days after last intake of medication</b>              |                   |                           |                           |                         |                           |                      |                 |         |                        |                                                 |                  |            |
| 1                                                                                                                              | randomised trials | serious <sup>1</sup>      | no serious inconsistency  | no serious indirectness | no serious imprecision    | none                 | 59/62 (95.2%)   | 91.1%   | RR 1.04 (0.96 to 1.14) | 36 more per 1000 (from 36 fewer to 128 more)    | ⊕⊕⊕○<br>MODERATE | CRITICAL   |
| <b>Tapentadol vs oxycodone - no opioid withdrawal - COWS assessment 5+ days after last intake of medication</b>                |                   |                           |                           |                         |                           |                      |                 |         |                        |                                                 |                  |            |
| 2                                                                                                                              | randomised trials | serious <sup>1</sup>      | no serious inconsistency  | no serious indirectness | no serious imprecision    | none                 | 215/236 (91.1%) | 84.9%   | RR 1.1 (1.01 to 1.19)  | 85 more per 1000 (from 8 more to 161 more)      | ⊕⊕⊕○<br>MODERATE | CRITICAL   |
| <b>Tapentadol vs oxycodone - mild or moderate opioid withdrawal - COWS assessment 2-4 days after last intake of medication</b> |                   |                           |                           |                         |                           |                      |                 |         |                        |                                                 |                  |            |
| 3                                                                                                                              | randomised trials | serious <sup>1</sup>      | no serious inconsistency  | no serious indirectness | serious <sup>2</sup>      | none                 | 86/466 (18.5%)  | 27.3%   | RR 0.70 (0.48 to 1.00) | 82 fewer per 1000 (from 142 fewer to 0 more)    | ⊕⊕○○<br>LOW      | CRITICAL   |
| <b>Tapentadol vs oxycodone - mild or moderate opioid withdrawal - COWS assessment 4 days after last intake of medication</b>   |                   |                           |                           |                         |                           |                      |                 |         |                        |                                                 |                  |            |
| 1                                                                                                                              | randomised trials | serious <sup>1</sup>      | no serious inconsistency  | no serious indirectness | very serious <sup>2</sup> | none                 | 3/62 (4.8%)     | 8.9%    | RR 0.54 (0.15 to 1.97) | 41 fewer per 1000 (from 76 fewer to 86 more)    | ⊕○○○<br>VERY LOW | CRITICAL   |
| <b>Tapentadol vs oxycodone - mild or moderate opioid withdrawal - COWS assessment 5+ days after last intake of medication</b>  |                   |                           |                           |                         |                           |                      |                 |         |                        |                                                 |                  |            |
| 2                                                                                                                              | randomised trials | very serious <sup>1</sup> | very serious <sup>4</sup> | no serious indirectness | very serious <sup>2</sup> | none                 | 21/236 (8.9%)   | 15.1%   | RR 0.33 (0.04 to 2.72) | 101 fewer per 1000 (from 145 fewer to 260 more) | ⊕○○○<br>VERY LOW | CRITICAL   |
| <b>Drug withdrawal syndrome</b>                                                                                                |                   |                           |                           |                         |                           |                      |                 |         |                        |                                                 |                  |            |

|   |                   |                           |                          |                         |                           |      |            |      |                         |                                                |                  |          |
|---|-------------------|---------------------------|--------------------------|-------------------------|---------------------------|------|------------|------|-------------------------|------------------------------------------------|------------------|----------|
| 1 | randomised trials | very serious <sup>1</sup> | no serious inconsistency | no serious indirectness | very serious <sup>2</sup> | none | 9/894 (1%) | 0.5% | RR 2.24 (0.29 to 17.63) | 95 fewer per 1000 (from 146 fewer to 465 more) | ⊕○○○<br>VERY LOW | CRITICAL |
|---|-------------------|---------------------------|--------------------------|-------------------------|---------------------------|------|------------|------|-------------------------|------------------------------------------------|------------------|----------|

<sup>1</sup> Downgraded by 1 increment if the majority of the evidence was at high risk of bias and downgraded by 2 increments if the majority of the evidence was at very high risk of bias.

<sup>2</sup> Downgraded by 1 increment if the confidence interval crossed one MID or by 2 increments if the confidence interval crossed both MIDs.

**Table 4: Evidence profile: Z-drugs versus placebo**

| Quality assessment                                                                                                                       |                   |                         |                          |                         |                           |                      | No of patients |         | Effect                 |                                              | Quality          | Importance |
|------------------------------------------------------------------------------------------------------------------------------------------|-------------------|-------------------------|--------------------------|-------------------------|---------------------------|----------------------|----------------|---------|------------------------|----------------------------------------------|------------------|------------|
| No of studies                                                                                                                            | Design            | Risk of bias            | Inconsistency            | Indirectness            | Imprecision               | Other considerations | Z-drugs        | Control | Relative (95% CI)      | Absolute                                     |                  |            |
| <b>Rebound insomnia – proportion of patients with a lower self-reported total sleep time - Run out phase - day 1 (follow-up 1 weeks)</b> |                   |                         |                          |                         |                           |                      |                |         |                        |                                              |                  |            |
| 1                                                                                                                                        | randomised trials | no serious risk of bias | no serious inconsistency | no serious indirectness | no serious imprecision    | none                 | 13/67 (19.4%)  | 6.4%    | RR 3.06 (1.33 to 7)    | 132 more per 1000 (from 21 more to 384 more) | ⊕⊕⊕⊕<br>HIGH     | CRITICAL   |
| <b>Rebound insomnia - proportion of patients with a lower self-reported total sleep time - Run out phase - day 2</b>                     |                   |                         |                          |                         |                           |                      |                |         |                        |                                              |                  |            |
| 1                                                                                                                                        | randomised trials | no serious risk of bias | no serious inconsistency | no serious indirectness | very serious <sup>1</sup> | none                 | 5/67 (7.5%)    | 5.6%    | RR 1.34 (0.44 to 4.07) | 19 more per 1000 (from 31 fewer to 172 more) | ⊕⊕○○<br>LOW      | CRITICAL   |
| <b>Rebound insomnia - proportion of patients with a lower self-reported total sleep time - Run out phase - day 3</b>                     |                   |                         |                          |                         |                           |                      |                |         |                        |                                              |                  |            |
| 1                                                                                                                                        | randomised trials | no serious risk of bias | no serious inconsistency | no serious indirectness | very serious <sup>1</sup> | none                 | 5/67 (7.5%)    | 4%      | RR 1.88 (0.56 to 6.27) | 35 more per 1000 (from 18 fewer to 211 more) | ⊕⊕○○<br>LOW      | CRITICAL   |
| <b>Rebound insomnia - proportion of patients with a lower self-reported time to sleep onset - Run out phase - day 1</b>                  |                   |                         |                          |                         |                           |                      |                |         |                        |                                              |                  |            |
| 1                                                                                                                                        | randomised trials | no serious risk of bias | no serious inconsistency | no serious indirectness | serious <sup>1</sup>      | none                 | 12/67 (17.9%)  | 6.4%    | RR 2.82 (1.21 to 6.56) | 116 more per 1000 (from 13 more to 356 more) | ⊕⊕⊕○<br>MODERATE | CRITICAL   |
| <b>Rebound insomnia – proportion of patients with a lower self-reported time to sleep onset - Run out phase - day 2</b>                  |                   |                         |                          |                         |                           |                      |                |         |                        |                                              |                  |            |
| 1                                                                                                                                        | randomised trials | no serious risk of bias | no serious inconsistency | no serious indirectness | very serious <sup>1</sup> | none                 | 4/67 (6%)      | 3.2%    | RR 1.88 (0.49 to 7.28) | 28 more per 1000 (from 16 fewer to 201 more) | ⊕⊕○○<br>LOW      | CRITICAL   |
| <b>Rebound insomnia – proportion of patients with a lower self-reported time to sleep onset - Run out phase - day 3</b>                  |                   |                         |                          |                         |                           |                      |                |         |                        |                                              |                  |            |
| 1                                                                                                                                        | randomised trials | no serious risk of bias | no serious inconsistency | no serious indirectness | very serious <sup>1</sup> | none                 | 5/67 (7.5%)    | 4%      | RR 1.88 (0.56 to 6.27) | 35 more per 1000 (from 18 fewer to 211 more) | ⊕⊕○○<br>LOW      | CRITICAL   |

<sup>1</sup> Downgraded by 1 increment if the confidence interval crossed one MID or by 2 increments if the confidence interval crossed both MIDs



**Table 5: Evidence profile: Benzodiazepines versus gabapentinoids**

| Quality assessment                                                                                                                   |                   |                           |                          |                         |                           |                      | No of patients                        |         | Effect                 |                                               | Quality          | Importance |
|--------------------------------------------------------------------------------------------------------------------------------------|-------------------|---------------------------|--------------------------|-------------------------|---------------------------|----------------------|---------------------------------------|---------|------------------------|-----------------------------------------------|------------------|------------|
| No of studies                                                                                                                        | Design            | Risk of bias              | Inconsistency            | Indirectness            | Imprecision               | Other considerations | Benzodiazepines versus gabapentinoids | Control | Relative (95% CI)      | Absolute                                      |                  |            |
| <b>Mean change in Physician Withdrawal Checklist (PWC) - higher dose gab - 1 week after taper (Better indicated by lower values)</b> |                   |                           |                          |                         |                           |                      |                                       |         |                        |                                               |                  |            |
| 1                                                                                                                                    | randomised trials | very serious <sup>1</sup> | no serious inconsistency | no serious indirectness | no serious imprecision    | none                 | 58                                    | 49      | -                      | MD 0.4 lower (3.09 lower to 2.29 higher)      | ⊕⊕○○<br>LOW      | CRITICAL   |
| <b>Mean change in PWC - higher dose gab - 2 week after taper (Better indicated by lower values)</b>                                  |                   |                           |                          |                         |                           |                      |                                       |         |                        |                                               |                  |            |
| 1                                                                                                                                    | randomised trials | very serious <sup>1</sup> | no serious inconsistency | no serious indirectness | no serious imprecision    | none                 | 54                                    | 44      | -                      | MD 0.5 higher (1.92 lower to 2.92 higher)     | ⊕⊕○○<br>LOW      | CRITICAL   |
| <b>Mean change in PWC after treatment period 2 - higher dose gab - 2 week after taper (Better indicated by lower values)</b>         |                   |                           |                          |                         |                           |                      |                                       |         |                        |                                               |                  |            |
| 1                                                                                                                                    | randomised trials | very serious <sup>1</sup> | no serious inconsistency | no serious indirectness | no serious imprecision    | none                 | 106                                   | 93      | -                      | MD 0.6 higher (1.08 lower to 2.28 higher)     | ⊕⊕○○<br>LOW      | CRITICAL   |
| <b>Mean change in PWC after treatment period 2 - higher dose gab - 1 week after taper (Better indicated by lower values)</b>         |                   |                           |                          |                         |                           |                      |                                       |         |                        |                                               |                  |            |
| 1                                                                                                                                    | randomised trials | very serious <sup>1</sup> | no serious inconsistency | no serious indirectness | no serious imprecision    | none                 | 109                                   | 99      | -                      | MD 1.3 lower (2.92 lower to 0.32 higher)      | ⊕⊕○○<br>LOW      | CRITICAL   |
| <b>Discontinuation emergent signs and syndromes (DESS) after period 1</b>                                                            |                   |                           |                          |                         |                           |                      |                                       |         |                        |                                               |                  |            |
| 1                                                                                                                                    | randomised trials | very serious <sup>1</sup> | no serious inconsistency | no serious indirectness | very serious <sup>2</sup> | none                 | 38/110<br>(34.5%)                     | 32.7%   | RR 1.06 (0.66 to 1.69) | 20 more per 1000 (from 111 fewer to 226 more) | ⊕○○○<br>VERY LOW | CRITICAL   |
| <b>DESS after period 2</b>                                                                                                           |                   |                           |                          |                         |                           |                      |                                       |         |                        |                                               |                  |            |
| 1                                                                                                                                    | randomised trials | very serious <sup>1</sup> | no serious inconsistency | no serious indirectness | very serious <sup>2</sup> | none                 | 55/203<br>(27.1%)                     | 28%     | RR 0.97 (0.66 to 1.42) | 8 fewer per 1000 (from 95 fewer to 118 more)  | ⊕○○○<br>VERY LOW | CRITICAL   |
| <b>Anxiety after period 1</b>                                                                                                        |                   |                           |                          |                         |                           |                      |                                       |         |                        |                                               |                  |            |

|                                 |                   |                           |                          |                         |                           |      |                |       |                              |                                                |                  |          |
|---------------------------------|-------------------|---------------------------|--------------------------|-------------------------|---------------------------|------|----------------|-------|------------------------------|------------------------------------------------|------------------|----------|
| 1                               | randomised trials | very serious <sup>1</sup> | no serious inconsistency | no serious indirectness | very serious <sup>2</sup> | none | 3/110 (2.7%)   | 3.9%  | RR 0.71 (0.12 to 4.12)       | 11 fewer per 1000 (from 34 fewer to 122 more)  | ⊕○○○<br>VERY LOW | CRITICAL |
| <b>Anxiety after period 2</b>   |                   |                           |                          |                         |                           |      |                |       |                              |                                                |                  |          |
| 1                               | randomised trials | very serious <sup>1</sup> | no serious inconsistency | no serious indirectness | very serious <sup>2</sup> | none | 11/203 (5.4%)  | 8%    | RR 0.68 (0.28 to 1.63)       | 26 fewer per 1000 (from 58 fewer to 50 more)   | ⊕○○○<br>VERY LOW | CRITICAL |
| <b>Dizziness after period 1</b> |                   |                           |                          |                         |                           |      |                |       |                              |                                                |                  |          |
| 1                               | randomised trials | very serious <sup>1</sup> | no serious inconsistency | no serious indirectness | very serious <sup>2</sup> | none | 3/110 (2.7%)   | 0%    | Peto OR 4.44 (0.39 to 50.92) | 30 more (from 10 fewer to per 1000 to 70 more) | ⊕○○○<br>VERY LOW | CRITICAL |
| <b>Headache after period 1</b>  |                   |                           |                          |                         |                           |      |                |       |                              |                                                |                  |          |
| 1                               | randomised trials | very serious <sup>1</sup> | no serious inconsistency | no serious indirectness | very serious <sup>2</sup> | none | 7/110 (6.4%)   | 1.9%  | RR 3.31 (0.42 to 26.2)       | 44 more per 1000 (from 11 fewer to 479 more)   | ⊕○○○<br>VERY LOW | CRITICAL |
| <b>Headache after period 2</b>  |                   |                           |                          |                         |                           |      |                |       |                              |                                                |                  |          |
| 1                               | randomised trials | very serious <sup>1</sup> | no serious inconsistency | no serious indirectness | very serious <sup>2</sup> | none | 8/203 (3.9%)   | 2%    | RR 1.97 (0.43 to 9.11)       | 19 more per 1000 (from 11 fewer to 162 more)   | ⊕○○○<br>VERY LOW | CRITICAL |
| <b>Insomnia after period 1</b>  |                   |                           |                          |                         |                           |      |                |       |                              |                                                |                  |          |
| 1                               | randomised trials | very serious <sup>1</sup> | no serious inconsistency | no serious indirectness | serious <sup>2</sup>      | none | 10/110 (9.1%)  | 19.2% | RR 0.47 (0.21 to 1.06)       | 102 fewer per 1000 (from 152 fewer to 12 more) | ⊕○○○<br>VERY LOW | CRITICAL |
| <b>Insomnia after period 2</b>  |                   |                           |                          |                         |                           |      |                |       |                              |                                                |                  |          |
| 1                               | randomised trials | very serious <sup>1</sup> | no serious inconsistency | no serious indirectness | serious <sup>2</sup>      | none | 21/203 (10.3%) | 6%    | RR 1.72 (0.72 to 4.14)       | 43 more per 1000 (from 17 fewer to 188 more)   | ⊕○○○<br>VERY LOW | CRITICAL |
| <b>Nausea after period 1</b>    |                   |                           |                          |                         |                           |      |                |       |                              |                                                |                  |          |
| 1                               | randomised trials | very serious <sup>1</sup> | no serious inconsistency | no serious indirectness | very serious <sup>2</sup> | none | 7/110 (6.4%)   | 3.9%  | RR 1.65 (0.36 to 7.69)       | 25 more per 1000 (from 25 fewer to 261 more)   | ⊕○○○<br>VERY LOW | CRITICAL |

| Rebound anxiety after treatment period 1 |                   |                           |                          |                         |                           |      |              |      |                        |                                              |                  |          |
|------------------------------------------|-------------------|---------------------------|--------------------------|-------------------------|---------------------------|------|--------------|------|------------------------|----------------------------------------------|------------------|----------|
| 1                                        | randomised trials | very serious <sup>1</sup> | no serious inconsistency | no serious indirectness | very serious <sup>2</sup> | none | 4/110 (3.6%) | 4.2% | RR 0.87 (0.17 to 4.6)  | 5 fewer per 1000 (from 35 fewer to 151 more) | ⊕○○○<br>VERY LOW | CRITICAL |
| Rebound anxiety after treatment period 2 |                   |                           |                          |                         |                           |      |              |      |                        |                                              |                  |          |
| 1                                        | randomised trials | very serious <sup>1</sup> | no serious inconsistency | no serious indirectness | serious <sup>2</sup>      | none | 4/203 (2%)   | 6%   | RR 0.33 (0.09 to 1.14) | 40 fewer per 1000 (from 55 fewer to 8 more)  | ⊕○○○<br>VERY LOW | CRITICAL |

1 Downgraded by 1 increment if the majority of the evidence was at high risk of bias and downgraded by 2 increments if the majority of the evidence was at very high risk of bias.

2 Downgraded by 1 increment if the confidence interval crossed one MID or by 2 increments if the confidence interval crossed both MIDs.

**Table 6: Evidence profile: Antidepressants versus placebo**

| Quality assessment                                                                      |                   |                         |                          |                         |                           |                      | No of patients  |         | Effect                       |                                                          | Quality          | Importance |
|-----------------------------------------------------------------------------------------|-------------------|-------------------------|--------------------------|-------------------------|---------------------------|----------------------|-----------------|---------|------------------------------|----------------------------------------------------------|------------------|------------|
| No of studies                                                                           | Design            | Risk of bias            | Inconsistency            | Indirectness            | Imprecision               | Other considerations | Antidepressants | Control | Relative (95% CI)            | Absolute                                                 |                  |            |
| Rebound insomnia (after discontinuation)                                                |                   |                         |                          |                         |                           |                      |                 |         |                              |                                                          |                  |            |
| 1                                                                                       | randomised trials | serious <sup>1</sup>    | no serious inconsistency | no serious indirectness | very serious <sup>2</sup> | none                 | 4/148 (2.7%)    | 1.4%    | RR 1.97 (0.22 to 17.34)      | 14 more per 1000 (from 11 fewer to 229 more)             | ⊕○○○<br>VERY LOW | CRITICAL   |
| Benzodiazepine Withdrawal symptom questionnaire criteria BWSQ                           |                   |                         |                          |                         |                           |                      |                 |         |                              |                                                          |                  |            |
| 1                                                                                       | randomised trials | serious <sup>1</sup>    | no serious inconsistency | no serious indirectness | very serious <sup>2</sup> | none                 | 1/148 (0.68%)   | 1.4%    | RR 0.49 (0.03 to 7.77)       | 7 fewer per 1000 (from 14 fewer to 95 more)              | ⊕○○○<br>VERY LOW | CRITICAL   |
| Suicide attempts (one study after discontinuation; other study time point not reported) |                   |                         |                          |                         |                           |                      |                 |         |                              |                                                          |                  |            |
| 2                                                                                       | randomised trials | no serious risk of bias | no serious inconsistency | no serious indirectness | very serious <sup>2</sup> | none                 | 2/605 (0.33%)   | 0.3%    | Peto OR 1.02 (0.09 to 12.12) | 0 fewer per 1000 (from 10 fewer to 10 more) <sup>6</sup> | ⊕⊕○○<br>LOW      | CRITICAL   |
| Depression (after discontinuation; except one study time point not reported)            |                   |                         |                          |                         |                           |                      |                 |         |                              |                                                          |                  |            |
| 3                                                                                       | randomised trials | serious <sup>1</sup>    | serious <sup>3</sup>     | no serious indirectness | very serious <sup>2</sup> | none                 | 16/1044 (1.5%)  | 0.6%    | RR 1.16 (0.15 to 8.76)       | 1 more per 1000 (from 5 fewer to 47 more)                | ⊕○○○<br>VERY LOW | CRITICAL   |

| <b>Suicide ideation (after discontinuation in two studies, one during study and other time point not reported)</b> |                   |                           |                          |                         |                           |      |                  |       |                              |                                                         |               |          |
|--------------------------------------------------------------------------------------------------------------------|-------------------|---------------------------|--------------------------|-------------------------|---------------------------|------|------------------|-------|------------------------------|---------------------------------------------------------|---------------|----------|
| 4                                                                                                                  | randomised trials | serious <sup>1</sup>      | no serious inconsistency | no serious indirectness | serious <sup>2</sup>      | none | 7/1498 (0.47%)   | 0%    | Peto OR 4.24 (0.82 to 21.90) | 0 more per 10000 (from 0 fewer to 10 more) <sup>6</sup> | ⊕⊕⊕⊕ LOW      | CRITICAL |
| <b>DESS - taper week 1 (Better indicated by lower values)</b>                                                      |                   |                           |                          |                         |                           |      |                  |       |                              |                                                         |               |          |
| 3                                                                                                                  | randomised trials | serious <sup>1</sup>      | serious <sup>4</sup>     | no serious indirectness | serious <sup>2</sup>      | none | 793              | 425   | -                            | MD 0.56 higher (0.01 lower to 1.13 higher)              | ⊕⊕⊕⊕ VERY LOW | CRITICAL |
| <b>DESS - taper week 2 (Better indicated by lower values)</b>                                                      |                   |                           |                          |                         |                           |      |                  |       |                              |                                                         |               |          |
| 2                                                                                                                  | randomised trials | serious <sup>1</sup>      | no serious inconsistency | no serious indirectness | no serious imprecision    | none | 694              | 359   | -                            | MD 0.48 higher (0.18 to 0.77 higher)                    | ⊕⊕⊕⊕ MODERATE | CRITICAL |
| <b>DESS - taper week 3 (Better indicated by lower values)</b>                                                      |                   |                           |                          |                         |                           |      |                  |       |                              |                                                         |               |          |
| 1                                                                                                                  | randomised trials | very serious <sup>1</sup> | no serious inconsistency | no serious indirectness | no serious imprecision    | none | 32               | 8     | -                            | MD 6 lower (9.56 to 2.45 lower)                         | ⊕⊕⊕⊕ LOW      | CRITICAL |
| <b>Vertigo (after discontinuation)</b>                                                                             |                   |                           |                          |                         |                           |      |                  |       |                              |                                                         |               |          |
| 1                                                                                                                  | randomised trials | very serious <sup>1</sup> | no serious inconsistency | no serious indirectness | no serious imprecision    | none | 12/324 (3.7%)    | 0%    | Peto OR 4.63 (1.37 to 15.6)  | 40 more per 1000 (from 10 more to 60 more) <sup>6</sup> | ⊕⊕⊕⊕ LOW      | CRITICAL |
| <b>Change after discontinuation</b>                                                                                |                   |                           |                          |                         |                           |      |                  |       |                              |                                                         |               |          |
| 1                                                                                                                  | randomised trials | no serious risk of bias   | no serious inconsistency | no serious indirectness | very serious <sup>2</sup> | none | 14/53 (26.4%)    | 20.8% | RR 1.27 (0.64 to 2.54)       | 56 more per 1000 (from 75 fewer to 320 more)            | ⊕⊕⊕⊕ LOW      | CRITICAL |
| <b>Discontinuation syndrome (after discontinuation)</b>                                                            |                   |                           |                          |                         |                           |      |                  |       |                              |                                                         |               |          |
| 1                                                                                                                  | randomised trials | no serious risk of bias   | no serious inconsistency | no serious indirectness | very serious <sup>2</sup> | none | 9/53 (17%)       | 9.4%  | RR 1.8 (0.65 to 5.02)        | 75 more per 1000 (from 33 fewer to 378 more)            | ⊕⊕⊕⊕ LOW      | CRITICAL |
| <b>Total taper/post study emergent AE</b>                                                                          |                   |                           |                          |                         |                           |      |                  |       |                              |                                                         |               |          |
| 9                                                                                                                  | randomised trials | very serious <sup>1</sup> | no serious inconsistency | no serious indirectness | no serious imprecision    | none | 600/1728 (34.7%) | 20.5% | RR 1.63 (1.44 to 1.84)       | 129 more per 1000 (from 90 more to 172 more)            | ⊕⊕⊕⊕ LOW      | CRITICAL |
| <b>Vomiting (after discontinuation)</b>                                                                            |                   |                           |                          |                         |                           |      |                  |       |                              |                                                         |               |          |
| 1                                                                                                                  | randomised trials | serious <sup>1</sup>      | no serious inconsistency | no serious indirectness | very serious <sup>2</sup> | none | 1/149 (0.67%)    | 1.9%  | RR 0.35 (0.04 to 3.34)       | 12 fewer per 1000 (from 18 fewer to 44 more)            | ⊕⊕⊕⊕ VERY LOW | CRITICAL |

| <b>Dizziness (after discontinuation)</b>                         |                   |                           |                          |                         |                           |      |                 |       |                         |                                                          |               |          |
|------------------------------------------------------------------|-------------------|---------------------------|--------------------------|-------------------------|---------------------------|------|-----------------|-------|-------------------------|----------------------------------------------------------|---------------|----------|
| 7                                                                | randomised trials | very serious <sup>1</sup> | no serious inconsistency | no serious indirectness | no serious imprecision    | none | 117/1457 (8%)   | 2.5%  | RR 4.86 (2.91 to 8.14)  | 97 more per 1000 (from 48 more to 179 more)              | ⊕⊕⊕⊕ LOW      | CRITICAL |
| <b>Nausea (after discontinuation)</b>                            |                   |                           |                          |                         |                           |      |                 |       |                         |                                                          |               |          |
| 6                                                                | randomised trials | very serious <sup>1</sup> | serious <sup>5</sup>     | no serious indirectness | no serious imprecision    | none | 103/1454 (7.1%) | 2.5%  | RR 2.78 (1.36 to 5.69)  | 45 more per 1000 (from 9 more to 117 more)               | ⊕⊕⊕⊕ VERY LOW | CRITICAL |
| <b>Headache (after discontinuation)</b>                          |                   |                           |                          |                         |                           |      |                 |       |                         |                                                          |               |          |
| 5                                                                | randomised trials | very serious <sup>1</sup> | no serious inconsistency | no serious indirectness | serious <sup>2</sup>      | none | 83/1390 (6%)    | 4.4%  | RR 1.39 (0.96 to 2)     | 17 more per 1000 (from 2 fewer to 44 more)               | ⊕⊕⊕⊕ VERY LOW | CRITICAL |
| <b>Insomnia (after discontinuation)</b>                          |                   |                           |                          |                         |                           |      |                 |       |                         |                                                          |               |          |
| 3                                                                | randomised trials | very serious <sup>1</sup> | no serious inconsistency | no serious indirectness | very serious <sup>2</sup> | none | 30/663 (4.5%)   | 1.9%  | RR 1.37 (0.75 to 2.52)  | 7 more per 1000 (from 5 fewer to 29 more)                | ⊕⊕⊕⊕ VERY LOW | CRITICAL |
| <b>Diarrhoea (after discontinuation)</b>                         |                   |                           |                          |                         |                           |      |                 |       |                         |                                                          |               |          |
| 1                                                                | randomised trials | serious <sup>1</sup>      | no serious inconsistency | no serious indirectness | very serious <sup>2</sup> | none | 4/149 (2.7%)    | 2.6%  | RR 1.05 (0.27 to 4.14)  | 1 more per 1000 (from 19 fewer to 82 more)               | ⊕⊕⊕⊕ VERY LOW | CRITICAL |
| <b>Serious adverse events during taper</b>                       |                   |                           |                          |                         |                           |      |                 |       |                         |                                                          |               |          |
| 2                                                                | randomised trials | serious <sup>1</sup>      | no serious inconsistency | no serious indirectness | very serious <sup>2</sup> | none | 1/479 (0.21%)   | 0.53% | RR 0.40 (0.04 to 4.03)  | 0 fewer per 1000 (from 10 fewer to 10 more) <sup>6</sup> | ⊕⊕⊕⊕ VERY LOW | CRITICAL |
| <b>Withdrawal syndrome (after discontinuation)</b>               |                   |                           |                          |                         |                           |      |                 |       |                         |                                                          |               |          |
| 1                                                                | randomised trials | no serious risk of bias   | no serious inconsistency | no serious indirectness | no serious imprecision    | none | 117/455 (25.7%) | 11.9% | RR 2.2 (1.4 to 3.46)    | 143 more per 1000 (from 48 more to 293 more)             | ⊕⊕⊕⊕ HIGH     | CRITICAL |
| <b>Upper respiratory tract infection (after discontinuation)</b> |                   |                           |                          |                         |                           |      |                 |       |                         |                                                          |               |          |
| 1                                                                | randomised trials | no serious risk of bias   | no serious inconsistency | no serious indirectness | very serious <sup>2</sup> | none | 17/455 (3.7%)   | 1.3%  | RR 3.17 (0.75 to 13.44) | 28 more per 1000 (from 3 fewer to 162 more)              | ⊕⊕⊕⊕ LOW      | CRITICAL |

1 Downgraded by 1 increment if the majority of the evidence was at high risk of bias and downgraded by 2 increments if the majority of the evidence was at very high risk of bias.

2 Downgraded by 1 increment if the confidence interval crossed one MID or by 2 increments if the confidence interval crossed both MIDs.

3 Downgraded by one increment because heterogeneity,  $I^2=65%$ ,  $p=0.06$ , unexplained by subgroup analysis.

4 Downgraded by one increment because heterogeneity,  $I^2=72%$ ,  $p=0.01$ , unexplained by subgroup analysis.

5 Downgraded by one increment because heterogeneity,  $I^2=53%$ ,  $p=0.05$ , unexplained by subgroup analysis.

6 Zero events in one or more arms so absolute effect calculated from risk difference.

7 One study reported suicide ideation with depression.

**Table 7: Evidence profile: Antidepressants versus antidepressants**

| Quality assessment                                                                  |                   |                      |                          |                         |                           |                      | No of patients |                | Effect                |                                             | Quality          | Importance |
|-------------------------------------------------------------------------------------|-------------------|----------------------|--------------------------|-------------------------|---------------------------|----------------------|----------------|----------------|-----------------------|---------------------------------------------|------------------|------------|
| No of studies                                                                       | Design            | Risk of bias         | Inconsistency            | Indirectness            | Imprecision               | Other considerations | Antidepressant | Antidepressant | Relative (95% CI)     | Absolute                                    |                  |            |
| <b>Suicide ideation - antidepressant v antidepressant (time point not reported)</b> |                   |                      |                          |                         |                           |                      |                |                |                       |                                             |                  |            |
| 1                                                                                   | randomised trials | serious <sup>1</sup> | no serious inconsistency | no serious indirectness | very serious <sup>2</sup> | none                 | 2/301 (0.66%)  | 1.3%           | RR 0.5 (0.07 to 3.55) | 6 fewer per 1000 (from 12 fewer to 33 more) | ⊕○○○<br>VERY LOW | CRITICAL   |

1 Downgraded by 1 increment if the majority of the evidence was at high risk of bias and downgraded by 2 increments if the majority of the evidence was at very high risk of bias.

2 Downgraded by 1 increment if the confidence interval crossed one MID or by 2 increments if the confidence interval crossed both MIDs.

### 1.1.3 Short versus long term opioid use

**Table 8: Evidence profile: Short versus long term opioid use**

| Quality assessment |                       |                           |                          |                           |                        |                      | No of patients                                         |         | Effect                 |          | Quality          | Importance |
|--------------------|-----------------------|---------------------------|--------------------------|---------------------------|------------------------|----------------------|--------------------------------------------------------|---------|------------------------|----------|------------------|------------|
| No of studies      | Design                | Risk of bias              | Inconsistency            | Indirectness              | Imprecision            | Other considerations | Long term opioid use compared to short term opioid use | Control | Relative (95% CI)      | Absolute |                  |            |
| <b>Depression</b>  |                       |                           |                          |                           |                        |                      |                                                        |         |                        |          |                  |            |
| 1                  | observational studies | very serious <sup>1</sup> | no serious inconsistency | very serious <sup>2</sup> | no serious imprecision | none                 | -                                                      | 0%      | HR 1.53 (1.29 to 1.81) | -        | ⊕○○○<br>VERY LOW | CRITICAL   |

| Alcohol abuse              |                       |                           |                          |                           |                        |      |   |    |                         |   |                  |          |
|----------------------------|-----------------------|---------------------------|--------------------------|---------------------------|------------------------|------|---|----|-------------------------|---|------------------|----------|
| 1                          | observational studies | very serious <sup>1</sup> | no serious inconsistency | very serious <sup>2</sup> | serious <sup>3</sup>   | none | - | 0% | HR 1.38 (0.9 to 2.12)   | - | ⊕000<br>VERY LOW | CRITICAL |
| Opioid abuse               |                       |                           |                          |                           |                        |      |   |    |                         |   |                  |          |
| 1                          | observational studies | very serious <sup>1</sup> | no serious inconsistency | very serious <sup>2</sup> | serious <sup>3</sup>   | none | - | 0% | HR 3.97 (0.87 to 18.12) | - | ⊕000<br>VERY LOW | CRITICAL |
| Other substance abuse      |                       |                           |                          |                           |                        |      |   |    |                         |   |                  |          |
| 1                          | observational studies | very serious <sup>1</sup> | no serious inconsistency | very serious <sup>2</sup> | serious <sup>3</sup>   | none | - | 0% | HR 1.81 (0.92 to 3.56)  | - | ⊕000<br>VERY LOW | CRITICAL |
| Opioid overdose            |                       |                           |                          |                           |                        |      |   |    |                         |   |                  |          |
| 1                          | observational studies | very serious <sup>1</sup> | no serious inconsistency | very serious <sup>2</sup> | no serious imprecision | none | - | 0% | HR 5.12 (1.63 to 16.08) | - | ⊕000<br>VERY LOW | CRITICAL |
| Other substance overdose   |                       |                           |                          |                           |                        |      |   |    |                         |   |                  |          |
| 1                          | observational studies | very serious <sup>1</sup> | no serious inconsistency | very serious <sup>2</sup> | serious <sup>3</sup>   | none | - | 0% | HR 1.82 (0.92 to 3.6)   | - | ⊕000<br>VERY LOW | CRITICAL |
| Opioid dependence          |                       |                           |                          |                           |                        |      |   |    |                         |   |                  |          |
| 1                          | observational studies | very serious <sup>1</sup> | no serious inconsistency | very serious <sup>2</sup> | no serious imprecision | none | - | 0% | HR 2.85 (1.54 to 5.27)  | - | ⊕000<br>VERY LOW | CRITICAL |
| Other substance dependence |                       |                           |                          |                           |                        |      |   |    |                         |   |                  |          |
| 1                          | observational studies | very serious <sup>1</sup> | no serious inconsistency | very serious <sup>2</sup> | serious <sup>3</sup>   | none | - | 0% | HR 1.73 (1.21 to 2.47)  | - | ⊕000<br>VERY LOW | CRITICAL |
| Mortality                  |                       |                           |                          |                           |                        |      |   |    |                         |   |                  |          |

|   |                       |                           |                          |                           |                        |      |   |    |                        |   |                  |          |
|---|-----------------------|---------------------------|--------------------------|---------------------------|------------------------|------|---|----|------------------------|---|------------------|----------|
| 1 | observational studies | very serious <sup>1</sup> | no serious inconsistency | very serious <sup>2</sup> | no serious imprecision | none | - | 0% | HR 0.99 (0.84 to 1.17) | - | ⊕○○○<br>VERY LOW | CRITICAL |
|---|-----------------------|---------------------------|--------------------------|---------------------------|------------------------|------|---|----|------------------------|---|------------------|----------|

1 Downgraded by 1 increment if the majority of the evidence was at high risk of bias and downgraded by 2 increments if the majority of the evidence was at very high risk of bias.

2 Downgraded by 1 or 2 increments because long term use used as proxy for dependence. Short term use population includes children. Some opioids received are not available on the NHS.

3 Downgraded by 1 increment if the confidence interval crossed one MID or by 2 increments if the confidence interval crossed both MIDs.

### 1.1.4 Short versus long term withdrawal

**Table 9: Evidence profile: 3 day taper vs 14 day taper of antidepressants**

| Quality assessment   |                   |                           |                          |                         |                           |                      | No of patients      |                       | Effect                 |                                              | Quality          | Importance |
|----------------------|-------------------|---------------------------|--------------------------|-------------------------|---------------------------|----------------------|---------------------|-----------------------|------------------------|----------------------------------------------|------------------|------------|
| No of studies        | Design            | Risk of bias              | Inconsistency            | Indirectness            | Imprecision               | Other considerations | Short taper – 3 day | Longer taper – 14 day | Relative (95% CI)      | Absolute                                     |                  |            |
| <b>DESS symptoms</b> |                   |                           |                          |                         |                           |                      |                     |                       |                        |                                              |                  |            |
| 1                    | randomised trials | very serious <sup>1</sup> | no serious inconsistency | no serious indirectness | very serious <sup>2</sup> | none                 | 7/15 (46.7%)        | 46.2%                 | RR 1.01 (0.46 to 2.25) | 5 more per 1000 (from 249 fewer to 577 more) | ⊕○○○<br>VERY LOW | CRITICAL   |

1 Downgraded by 1 increment if the majority of the evidence was at high risk of bias and downgraded by 2 increments if the majority of the evidence was at very high risk of bias.

2 Downgraded by 1 increment if the confidence interval crossed one MID or by 2 increments if the confidence interval crossed both MIDs.

**Table 10: Evidence profile: abrupt vs taper of antidepressant withdrawal (managed taper of 25mg/d for one week)**

| Quality assessment |                   |                           |                          |                         |                           |                      | No of patients |       | Effect                 |                                              | Quality          | Importance |
|--------------------|-------------------|---------------------------|--------------------------|-------------------------|---------------------------|----------------------|----------------|-------|------------------------|----------------------------------------------|------------------|------------|
| No of studies      | Design            | Risk of bias              | Inconsistency            | Indirectness            | Imprecision               | Other considerations | Abrupt         | Taper | Relative (95% CI)      | Absolute                                     |                  |            |
| <b>DESS score</b>  |                   |                           |                          |                         |                           |                      |                |       |                        |                                              |                  |            |
| 1                  | randomised trials | very serious <sup>1</sup> | no serious inconsistency | no serious indirectness | very serious <sup>2</sup> | none                 | 31/146 (21.2%) | 21.6% | RR 0.98 (0.63 to 1.54) | 4 fewer per 1000 (from 80 fewer to 117 more) | ⊕○○○<br>VERY LOW | CRITICAL   |



| Taper/post-therapy-emergent adverse events |                   |                           |                          |                         |                           |      |                |       |                               |                                              |                  |          |
|--------------------------------------------|-------------------|---------------------------|--------------------------|-------------------------|---------------------------|------|----------------|-------|-------------------------------|----------------------------------------------|------------------|----------|
| 1                                          | randomised trials | very serious <sup>1</sup> | no serious inconsistency | no serious indirectness | serious <sup>2</sup>      | none | 75/146 (51.4%) | 38.9% | RR 1.32 (1.02 to 1.72)        | 124 more per 1000 (from 8 more to 280 more)  | ⊕○○○<br>VERY LOW | CRITICAL |
| Headache                                   |                   |                           |                          |                         |                           |      |                |       |                               |                                              |                  |          |
| 1                                          | randomised trials | very serious <sup>1</sup> | no serious inconsistency | no serious indirectness | serious <sup>2</sup>      | none | 19/146 (13%)   | 6.5%  | RR 2.01 (0.94 to 4.29)        | 66 more per 1000 (from 4 fewer to 214 more)  | ⊕○○○<br>VERY LOW | CRITICAL |
| Nausea                                     |                   |                           |                          |                         |                           |      |                |       |                               |                                              |                  |          |
| 1                                          | randomised trials | very serious <sup>1</sup> | no serious inconsistency | no serious indirectness | very serious <sup>2</sup> | none | 9/146 (6.2%)   | 4.3%  | RR 1.43 (0.52 to 3.91)        | 18 more per 1000 (from 21 fewer to 125 more) | ⊕○○○<br>VERY LOW | CRITICAL |
| Dizziness                                  |                   |                           |                          |                         |                           |      |                |       |                               |                                              |                  |          |
| 1                                          | randomised trials | very serious <sup>1</sup> | no serious inconsistency | no serious indirectness | very serious <sup>2</sup> | none | 14/146 (9.6%)  | 5.8%  | RR 1.67 (0.72 to 3.85)        | 39 more per 1000 (from 16 fewer to 165 more) | ⊕○○○<br>VERY LOW | CRITICAL |
| Suicide ideation                           |                   |                           |                          |                         |                           |      |                |       |                               |                                              |                  |          |
| 1                                          | randomised trials | very serious <sup>1</sup> | no serious inconsistency | no serious indirectness | very serious <sup>2</sup> | none | 1/146 (0.68%)  | 0.7%  | RR 0.95 (0.06 to 15.07)       | 0 fewer per 1000 (from 7 fewer to 98 more)   | ⊕○○○<br>VERY LOW | CRITICAL |
| Suicide attempts                           |                   |                           |                          |                         |                           |      |                |       |                               |                                              |                  |          |
| 1                                          | randomised trials | very serious <sup>1</sup> | no serious inconsistency | no serious indirectness | very serious <sup>2</sup> | none | 1/146 (0.68%)  | 0%    | Peto OR 7.04 (0.14 to 355.37) | 10 fewer per 1000 (from 10 fewer to 30 more) | ⊕○○○<br>VERY LOW | CRITICAL |

1 Downgraded by 1 increment if the majority of the evidence was at high risk of bias and downgraded by 2 increments if the majority of the evidence was at very high risk of bias.

2 Downgraded by 1 increment if the confidence interval crossed one MID or by 2 increments if the confidence interval crossed both MIDs.

**Table 11: Evidence profile: rapid (1-7 days) versus gradual withdrawal of antidepressants (2 weeks or more)**

| Quality assessment               |                       |                           |                          |                      |                           |                      | No of patients   |                    | Effect                |          | Quality          | Importance |
|----------------------------------|-----------------------|---------------------------|--------------------------|----------------------|---------------------------|----------------------|------------------|--------------------|-----------------------|----------|------------------|------------|
| No of studies                    | Design                | Risk of bias              | Inconsistency            | Indirectness         | Imprecision               | Other considerations | Rapid withdrawal | Gradual withdrawal | Relative (95% CI)     | Absolute |                  |            |
| <b>Time to first new illness</b> |                       |                           |                          |                      |                           |                      |                  |                    |                       |          |                  |            |
| 1                                | observational studies | very serious <sup>1</sup> | no serious inconsistency | serious <sup>3</sup> | very serious <sup>2</sup> | none                 | -                | 0%                 | HR 1.5 (1.14 to 1.97) | -        | ⊕○○○<br>VERY LOW | CRITICAL   |

1 Downgraded by 1 increment if the majority of the evidence was at high risk of bias and downgraded by 2 increments if the majority of the evidence was at very high risk of bias.

2 Downgraded by 1 increment if the confidence interval crossed one MID or by 2 increments if the confidence interval crossed both MIDs.

3 Downgraded by 1 increment because the majority of the evidence included drugs grouped together so they were not all listed and could have included drugs not listed on the included list.

**Table 12: Evidence profile: Abrupt withdrawal vs tapered withdrawal of antidepressants (50 mg alternate days for two weeks)**

| Quality assessment                                                |                   |                      |                          |                         |                           |                      | No of patients |                   | Effect                 |                                              | Quality          | Importance |
|-------------------------------------------------------------------|-------------------|----------------------|--------------------------|-------------------------|---------------------------|----------------------|----------------|-------------------|------------------------|----------------------------------------------|------------------|------------|
| No of studies                                                     | Design            | Risk of bias         | Inconsistency            | Indirectness            | Imprecision               | Other considerations | Abrupt         | Taper (alternate) | Relative (95% CI)      | Absolute                                     |                  |            |
| <b>DESS after taper week 3 (Better indicated by lower values)</b> |                   |                      |                          |                         |                           |                      |                |                   |                        |                                              |                  |            |
| 1                                                                 | randomised trials | serious <sup>1</sup> | no serious inconsistency | no serious indirectness | serious <sup>2</sup>      | none                 | 59             | 59                | -                      | MD 1.44 higher (0.04 lower to 2.92 higher)   | ⊕⊕○○<br>LOW      | CRITICAL   |
| <b>Any adverse events</b>                                         |                   |                      |                          |                         |                           |                      |                |                   |                        |                                              |                  |            |
| 1                                                                 | randomised trials | serious <sup>1</sup> | no serious inconsistency | no serious indirectness | serious <sup>2</sup>      | none                 | 53/101 (52.5%) | 52%               | RR 1.01 (0.78 to 1.31) | 5 more per 1000 (from 114 fewer to 161 more) | ⊕⊕○○<br>LOW      | CRITICAL   |
| <b>Asthenia</b>                                                   |                   |                      |                          |                         |                           |                      |                |                   |                        |                                              |                  |            |
| 1                                                                 | randomised trials | serious <sup>1</sup> | no serious inconsistency | no serious indirectness | very serious <sup>2</sup> | none                 | 8/101 (7.9%)   | 4.9%              | RR 1.62 (0.55 to 4.77) | 30 more per 1000 (from 22 fewer to 185 more) | ⊕○○○<br>VERY LOW | CRITICAL   |
| <b>Diarrhoea</b>                                                  |                   |                      |                          |                         |                           |                      |                |                   |                        |                                              |                  |            |

|                           |                   |                      |                          |                         |                           |      |                |       |                        |                                              |                  |          |
|---------------------------|-------------------|----------------------|--------------------------|-------------------------|---------------------------|------|----------------|-------|------------------------|----------------------------------------------|------------------|----------|
| 1                         | randomised trials | serious <sup>1</sup> | no serious inconsistency | no serious indirectness | very serious <sup>2</sup> | none | 5/101 (5%)     | 5.9%  | RR 0.84 (0.27 to 2.67) | 9 fewer per 1000 (from 43 fewer to 99 more)  | ⊕○○○<br>VERY LOW | CRITICAL |
| <b>Dizziness</b>          |                   |                      |                          |                         |                           |      |                |       |                        |                                              |                  |          |
| 1                         | randomised trials | serious <sup>1</sup> | no serious inconsistency | no serious indirectness | very serious <sup>2</sup> | none | 15/101 (14.9%) | 11.8% | RR 1.26 (0.62 to 2.56) | 31 more per 1000 (from 45 fewer to 184 more) | ⊕○○○<br>VERY LOW | CRITICAL |
| <b>Emotional lability</b> |                   |                      |                          |                         |                           |      |                |       |                        |                                              |                  |          |
| 1                         | randomised trials | serious <sup>1</sup> | no serious inconsistency | no serious indirectness | very serious <sup>2</sup> | none | 4/101 (4%)     | 5.9%  | RR 0.67 (0.2 to 2.31)  | 19 fewer per 1000 (from 47 fewer to 77 more) | ⊕○○○<br>VERY LOW | CRITICAL |
| <b>Headache</b>           |                   |                      |                          |                         |                           |      |                |       |                        |                                              |                  |          |
| 1                         | randomised trials | serious <sup>1</sup> | no serious inconsistency | no serious indirectness | very serious <sup>2</sup> | none | 9/101 (8.9%)   | 11.8% | RR 0.76 (0.33 to 1.72) | 28 fewer per 1000 (from 79 fewer to 85 more) | ⊕○○○<br>VERY LOW | CRITICAL |
| <b>Hypertension</b>       |                   |                      |                          |                         |                           |      |                |       |                        |                                              |                  |          |
| 1                         | randomised trials | serious <sup>1</sup> | no serious inconsistency | no serious indirectness | very serious <sup>2</sup> | none | 2/101 (2%)     | 5.9%  | RR 0.34 (0.07 to 1.63) | 39 fewer per 1000 (from 55 fewer to 37 more) | ⊕○○○<br>VERY LOW | CRITICAL |
| <b>Infection</b>          |                   |                      |                          |                         |                           |      |                |       |                        |                                              |                  |          |
| 1                         | randomised trials | serious <sup>1</sup> | no serious inconsistency | no serious indirectness | very serious <sup>2</sup> | none | 2/101 (2%)     | 5.9%  | RR 0.34 (0.07 to 1.63) | 39 fewer per 1000 (from 55 fewer to 37 more) | ⊕○○○<br>VERY LOW | CRITICAL |
| <b>Insomnia</b>           |                   |                      |                          |                         |                           |      |                |       |                        |                                              |                  |          |
| 1                         | randomised trials | serious <sup>1</sup> | no serious inconsistency | no serious indirectness | very serious <sup>2</sup> | none | 5/101 (5%)     | 5.9%  | RR 0.84 (0.27 to 2.67) | 9 fewer per 1000 (from 43 fewer to 99 more)  | ⊕○○○<br>VERY LOW | CRITICAL |
| <b>Nausea</b>             |                   |                      |                          |                         |                           |      |                |       |                        |                                              |                  |          |
| 1                         | randomised trials | serious <sup>1</sup> | no serious inconsistency | no serious indirectness | very serious <sup>2</sup> | none | 10/101 (9.9%)  | 8.8%  | RR 1.12 (0.48 to 2.65) | 11 more per 1000 (from 46 fewer to 145 more) | ⊕○○○<br>VERY LOW | CRITICAL |

| Sweating     |                   |                      |                          |                         |                           |      |              |      |                        |                                              |                  |          |
|--------------|-------------------|----------------------|--------------------------|-------------------------|---------------------------|------|--------------|------|------------------------|----------------------------------------------|------------------|----------|
| 1            | randomised trials | serious <sup>1</sup> | no serious inconsistency | no serious indirectness | very serious <sup>2</sup> | none | 3/101 (3%)   | 6.9% | RR 0.43 (0.12 to 1.63) | 39 fewer per 1000 (from 61 fewer to 43 more) | ⊕○○○<br>VERY LOW | CRITICAL |
| Vasodilation |                   |                      |                          |                         |                           |      |              |      |                        |                                              |                  |          |
| 1            | randomised trials | serious <sup>1</sup> | no serious inconsistency | no serious indirectness | very serious <sup>2</sup> | none | 7/101 (6.9%) | 5.9% | RR 1.18 (0.41 to 3.38) | 11 more per 1000 (from 35 fewer to 140 more) | ⊕○○○<br>VERY LOW | CRITICAL |

1 Downgraded by 1 increment if the majority of the evidence was at high risk of bias and downgraded by 2 increments if the majority of the evidence was at very high risk of bias.

2 Downgraded by 1 increment if the confidence interval crossed one MID or by 2 increments if the confidence interval crossed both MIDs.

**Table 13: Evidence profile: Abrupt withdrawal vs tapered withdrawal of antidepressants (50 mg for one week and then placebo for one week)**

| Quality assessment                                                |                   |                      |                          |                         |                           |                      | No of patients |                         | Effect                 |                                                | Quality          | Importance |
|-------------------------------------------------------------------|-------------------|----------------------|--------------------------|-------------------------|---------------------------|----------------------|----------------|-------------------------|------------------------|------------------------------------------------|------------------|------------|
| No of studies                                                     | Design            | Risk of bias         | Inconsistency            | Indirectness            | Imprecision               | Other considerations | Abrupt         | Taper (50 then placebo) | Relative (95% CI)      | Absolute                                       |                  |            |
| <b>DESS after taper week 3 (Better indicated by lower values)</b> |                   |                      |                          |                         |                           |                      |                |                         |                        |                                                |                  |            |
| 1                                                                 | randomised trials | serious <sup>1</sup> | no serious inconsistency | no serious indirectness | no serious imprecision    | none                 | 47             | 59                      | -                      | MD 0.08 lower (1.3 lower to 1.14 higher)       | ⊕⊕⊕○<br>MODERATE | CRITICAL   |
| <b>Any adverse events</b>                                         |                   |                      |                          |                         |                           |                      |                |                         |                        |                                                |                  |            |
| 1                                                                 | randomised trials | serious <sup>1</sup> | no serious inconsistency | no serious indirectness | very serious <sup>2</sup> | none                 | 43/87 (49.4%)  | 52%                     | RR 0.95 (0.72 to 1.26) | 26 fewer per 1000 (from 146 fewer to 135 more) | ⊕○○○<br>VERY LOW | CRITICAL   |
| <b>Asthenia</b>                                                   |                   |                      |                          |                         |                           |                      |                |                         |                        |                                                |                  |            |
| 1                                                                 | randomised trials | serious <sup>1</sup> | no serious inconsistency | no serious indirectness | very serious <sup>2</sup> | none                 | 2/87 (2.3%)    | 4.9%                    | RR 0.47 (0.09 to 2.36) | 26 fewer per 1000 (from 45 fewer to 67 more)   | ⊕○○○<br>VERY LOW | CRITICAL   |
| <b>Diarrhoea</b>                                                  |                   |                      |                          |                         |                           |                      |                |                         |                        |                                                |                  |            |
| 1                                                                 | randomised trials | serious <sup>1</sup> | no serious inconsistency | no serious indirectness | very serious <sup>2</sup> | none                 | 5/87 (5.7%)    | 5.9%                    | RR 0.98 (0.31 to 3.09) | 1 fewer per 1000 (from 41 fewer to 123 more)   | ⊕○○○<br>VERY LOW | CRITICAL   |
| <b>Dizziness</b>                                                  |                   |                      |                          |                         |                           |                      |                |                         |                        |                                                |                  |            |

|                           |                   |                      |                          |                         |                           |      |               |       |                        |                                              |                  |          |
|---------------------------|-------------------|----------------------|--------------------------|-------------------------|---------------------------|------|---------------|-------|------------------------|----------------------------------------------|------------------|----------|
| 1                         | randomised trials | serious <sup>1</sup> | no serious inconsistency | no serious indirectness | very serious <sup>2</sup> | none | 10/87 (11.5%) | 11.8% | RR 0.98 (0.44 to 2.15) | 2 fewer per 1000 (from 66 fewer to 136 more) | ⊕000<br>VERY LOW | CRITICAL |
| <b>Emotional lability</b> |                   |                      |                          |                         |                           |      |               |       |                        |                                              |                  |          |
| 1                         | randomised trials | serious <sup>1</sup> | no serious inconsistency | no serious indirectness | very serious <sup>2</sup> | none | 4/87 (4.6%)   | 5.9%  | RR 0.78 (0.23 to 2.68) | 13 fewer per 1000 (from 45 fewer to 99 more) | ⊕000<br>VERY LOW | CRITICAL |
| <b>Headache</b>           |                   |                      |                          |                         |                           |      |               |       |                        |                                              |                  |          |
| 1                         | randomised trials | serious <sup>1</sup> | no serious inconsistency | no serious indirectness | very serious <sup>2</sup> | none | 7/87 (8%)     | 11.8% | RR 0.68 (0.28 to 1.66) | 38 fewer per 1000 (from 85 fewer to 78 more) | ⊕000<br>VERY LOW | CRITICAL |
| <b>Hypertension</b>       |                   |                      |                          |                         |                           |      |               |       |                        |                                              |                  |          |
| 1                         | randomised trials | serious <sup>1</sup> | no serious inconsistency | no serious indirectness | very serious <sup>2</sup> | none | 2/87 (2.3%)   | 5.9%  | RR 0.39 (0.08 to 1.89) | 36 fewer per 1000 (from 54 fewer to 53 more) | ⊕000<br>VERY LOW | CRITICAL |
| <b>Infection</b>          |                   |                      |                          |                         |                           |      |               |       |                        |                                              |                  |          |
| 1                         | randomised trials | serious <sup>1</sup> | no serious inconsistency | no serious indirectness | very serious <sup>2</sup> | none | 3/87 (3.4%)   | 5.9%  | RR 0.59 (0.15 to 2.28) | 24 fewer per 1000 (from 50 fewer to 76 more) | ⊕000<br>VERY LOW | CRITICAL |
| <b>Insomnia</b>           |                   |                      |                          |                         |                           |      |               |       |                        |                                              |                  |          |
| 1                         | randomised trials | serious <sup>1</sup> | no serious inconsistency | no serious indirectness | very serious <sup>2</sup> | none | 5/87 (5.7%)   | 5.9%  | RR 0.98 (0.31 to 3.09) | 1 fewer per 1000 (from 41 fewer to 123 more) | ⊕000<br>VERY LOW | CRITICAL |
| <b>Nausea</b>             |                   |                      |                          |                         |                           |      |               |       |                        |                                              |                  |          |
| 1                         | randomised trials | serious <sup>1</sup> | no serious inconsistency | no serious indirectness | very serious <sup>2</sup> | none | 7/87 (8%)     | 8.8%  | RR 0.91 (0.35 to 2.35) | 8 fewer per 1000 (from 57 fewer to 119 more) | ⊕000<br>VERY LOW | CRITICAL |
| <b>Sweating</b>           |                   |                      |                          |                         |                           |      |               |       |                        |                                              |                  |          |
| 1                         | randomised trials | serious <sup>1</sup> | no serious inconsistency | no serious indirectness | very serious <sup>2</sup> | none | 4/87 (4.6%)   | 6.9%  | RR 0.67 (0.2 to 2.21)  | 23 fewer per 1000 (from 55 fewer to 83 more) | ⊕000<br>VERY LOW | CRITICAL |
| <b>Vasodilation</b>       |                   |                      |                          |                         |                           |      |               |       |                        |                                              |                  |          |
| 1                         | randomised trials | serious <sup>1</sup> | no serious inconsistency | no serious indirectness | very serious <sup>2</sup> | none | 1/87 (1.1%)   | 5.9%  | RR 0.2 (0.02 to 1.59)  | 47 fewer per 1000 (from 58 fewer to 35 more) | ⊕000<br>VERY LOW | CRITICAL |

1 Downgraded by 1 increment if the majority of the evidence was at high risk of bias and downgraded by 2 increments if the majority of the evidence was at very high risk of bias.

2 Downgraded by 1 increment if the confidence interval crossed one MID or by 2 increments if the confidence interval crossed both MIDs.

Table 14: Evidence profile: Abrupt withdrawal vs tapered withdrawal of antidepressant (50 mg for one week and then 25 mg for one week)

| Quality assessment                                                |                   |                      |                          |                         |                           |                      | No of patients |                    | Effect                      |                                                           | Quality         | Importance |
|-------------------------------------------------------------------|-------------------|----------------------|--------------------------|-------------------------|---------------------------|----------------------|----------------|--------------------|-----------------------------|-----------------------------------------------------------|-----------------|------------|
| No of studies                                                     | Design            | Risk of bias         | Inconsistency            | Indirectness            | Imprecision               | Other considerations | Abrupt         | Taper (50 then 25) | Relative (95% CI)           | Absolute                                                  |                 |            |
| <b>DESS after taper week 3 (Better indicated by lower values)</b> |                   |                      |                          |                         |                           |                      |                |                    |                             |                                                           |                 |            |
| 1                                                                 | randomised trials | serious <sup>1</sup> | no serious inconsistency | no serious indirectness | serious <sup>2</sup>      | none                 | 57             | 59                 | -                           | MD 2.33 higher (0.62 to 4.04 higher)                      | ⊕⊕⊕<br>LOW      | CRITICAL   |
| <b>Any adverse events</b>                                         |                   |                      |                          |                         |                           |                      |                |                    |                             |                                                           |                 |            |
| 1                                                                 | randomised trials | serious <sup>1</sup> | no serious inconsistency | no serious indirectness | very serious <sup>2</sup> | none                 | 47/94 (50%)    | 52%                | RR 0.96 (0.73 to 1.27)      | 21 fewer per 1000 (from 140 fewer to 140 more)            | ⊕⊕⊕<br>VERY LOW | CRITICAL   |
| <b>Asthenia</b>                                                   |                   |                      |                          |                         |                           |                      |                |                    |                             |                                                           |                 |            |
| 1                                                                 | randomised trials | serious <sup>1</sup> | no serious inconsistency | no serious indirectness | serious <sup>2</sup>      | none                 | 0/94 (0%)      | 4.9%               | Peto OR 0.14 (0.02 to 0.83) | 42 fewer per 1000 (from 8 fewer to 48 fewer) <sup>3</sup> | ⊕⊕⊕<br>LOW      | CRITICAL   |
| <b>Diarrhoea</b>                                                  |                   |                      |                          |                         |                           |                      |                |                    |                             |                                                           |                 |            |
| 1                                                                 | randomised trials | serious <sup>1</sup> | no serious inconsistency | no serious indirectness | very serious <sup>2</sup> | none                 | 3/94 (3.2%)    | 5.9%               | RR 0.54 (0.14 to 2.11)      | 27 fewer per 1000 (from 51 fewer to 65 more)              | ⊕⊕⊕<br>VERY LOW | CRITICAL   |
| <b>Dizziness</b>                                                  |                   |                      |                          |                         |                           |                      |                |                    |                             |                                                           |                 |            |
| 1                                                                 | randomised trials | serious <sup>1</sup> | no serious inconsistency | no serious indirectness | very serious <sup>2</sup> | none                 | 8/94 (8.5%)    | 11.8%              | RR 0.72 (0.31 to 1.69)      | 33 fewer per 1000 (from 81 fewer to 81 more)              | ⊕⊕⊕<br>VERY LOW | CRITICAL   |
| <b>Emotional lability</b>                                         |                   |                      |                          |                         |                           |                      |                |                    |                             |                                                           |                 |            |
| 1                                                                 | randomised trials | serious <sup>1</sup> | no serious inconsistency | no serious indirectness | very serious <sup>2</sup> | none                 | 1/94 (1.1%)    | 5.9%               | RR 0.18 (0.02 to 1.47)      | 48 fewer per 1000 (from 58 fewer to 28 more)              | ⊕⊕⊕<br>VERY LOW | CRITICAL   |
| <b>Headache</b>                                                   |                   |                      |                          |                         |                           |                      |                |                    |                             |                                                           |                 |            |

|                     |                   |                      |                          |                         |                           |      |             |       |                            |                                                             |                  |          |
|---------------------|-------------------|----------------------|--------------------------|-------------------------|---------------------------|------|-------------|-------|----------------------------|-------------------------------------------------------------|------------------|----------|
| 1                   | randomised trials | serious <sup>1</sup> | no serious inconsistency | no serious indirectness | very serious <sup>2</sup> | none | 7/94 (7.4%) | 11.8% | RR 0.63 (0.26 to 1.54)     | 44 fewer per 1000 (from 87 fewer to 64 more)                | ⊕○○○<br>VERY LOW | CRITICAL |
| <b>Hypertension</b> |                   |                      |                          |                         |                           |      |             |       |                            |                                                             |                  |          |
| 1                   | randomised trials | serious <sup>1</sup> | no serious inconsistency | no serious indirectness | no serious imprecision    | none | 0/94 (0%)   | 5.9%  | Peto OR 0.14 (0.03 to 0.7) | 60 fewer per 1000 (from 110 fewer to 10 fewer) <sup>3</sup> | ⊕⊕⊕○<br>MODERATE | CRITICAL |
| <b>Infection</b>    |                   |                      |                          |                         |                           |      |             |       |                            |                                                             |                  |          |
| 1                   | randomised trials | serious <sup>1</sup> | no serious inconsistency | no serious indirectness | very serious <sup>2</sup> | none | 2/94 (2.1%) | 5.9%  | RR 0.36 (0.07 to 1.75)     | 38 fewer per 1000 (from 55 fewer to 44 more)                | ⊕○○○<br>VERY LOW | CRITICAL |
| <b>Insomnia</b>     |                   |                      |                          |                         |                           |      |             |       |                            |                                                             |                  |          |
| 1                   | randomised trials | serious <sup>1</sup> | no serious inconsistency | no serious indirectness | very serious <sup>2</sup> | none | 5/94 (5.3%) | 5.9%  | RR 0.9 (0.29 to 2.87)      | 6 fewer per 1000 (from 42 fewer to 110 more)                | ⊕○○○<br>VERY LOW | CRITICAL |
| <b>Nausea</b>       |                   |                      |                          |                         |                           |      |             |       |                            |                                                             |                  |          |
| 1                   | randomised trials | serious <sup>1</sup> | no serious inconsistency | no serious indirectness | very serious <sup>2</sup> | none | 9/94 (9.6%) | 8.8%  | RR 1.09 (0.45 to 2.62)     | 8 more per 1000 (from 48 fewer to 143 more)                 | ⊕○○○<br>VERY LOW | CRITICAL |
| <b>Sweating</b>     |                   |                      |                          |                         |                           |      |             |       |                            |                                                             |                  |          |
| 1                   | randomised trials | serious <sup>1</sup> | no serious inconsistency | no serious indirectness | very serious <sup>2</sup> | none | 2/94 (2.1%) | 6.9%  | RR 0.31 (0.07 to 1.46)     | 48 fewer per 1000 (from 64 fewer to 32 more)                | ⊕○○○<br>VERY LOW | CRITICAL |
| <b>Vasodilation</b> |                   |                      |                          |                         |                           |      |             |       |                            |                                                             |                  |          |
| 1                   | randomised trials | serious <sup>1</sup> | no serious inconsistency | no serious indirectness | very serious <sup>2</sup> | none | 5/94 (5.3%) | 5.9%  | RR 0.9 (0.29 to 2.87)      | 6 fewer per 1000 (from 42 fewer to 110 more)                | ⊕○○○<br>VERY LOW | CRITICAL |

1 Downgraded by 1 increment if the majority of the evidence was at high risk of bias and downgraded by 2 increments if the majority of the evidence was at very high risk of bias.

2 Downgraded by 1 increment if the confidence interval crossed one MID or by 2 increments if the confidence interval crossed both MIDs.

3 Zero events in one or more arms so absolute effect calculated from risk difference.

## 1.2 Risk factors for dependence, discontinuation and short term withdrawal – Modified GRADE

### 1.2.1 Opioids

**Table 15: Risk factor: Age (referent: 35-44) – Outcome: Long-term opioid use (12 months)**

| Quality assessment                                         |                       |                           |                          |                         |                      |                      | Adjusted effect<br>Age (referent: 35-44) | Quality  |
|------------------------------------------------------------|-----------------------|---------------------------|--------------------------|-------------------------|----------------------|----------------------|------------------------------------------|----------|
| No of studies                                              | Design                | Risk of bias              | Inconsistency            | Indirectness            | Imprecision          | Other considerations | Relative<br>(95% CI)                     |          |
| <b>Long-term opioid use (12 months) – Age &lt;24 years</b> |                       |                           |                          |                         |                      |                      |                                          |          |
| 1                                                          | Observational studies | Very serious <sup>1</sup> | No serious inconsistency | No serious indirectness | Serious <sup>2</sup> | None                 | OR 0.96 (0.36 to 2.56)                   | VERY LOW |
| <b>Long-term opioid use (12 months) – Age 25-34 years</b>  |                       |                           |                          |                         |                      |                      |                                          |          |
| 1                                                          | Observational studies | Very serious <sup>1</sup> | No serious inconsistency | No serious indirectness | Serious <sup>2</sup> | None                 | OR 0.92 (0.5 to 1.69)                    | VERY LOW |
| <b>Long-term opioid use (12 months) – Age 45-54 years</b>  |                       |                           |                          |                         |                      |                      |                                          |          |
| 1                                                          | Observational studies | Very serious <sup>1</sup> | No serious inconsistency | No serious indirectness | Serious <sup>2</sup> | None                 | OR 1.51 (0.87 to 2.62)                   | VERY LOW |
| <b>Long-term opioid use (12 months) – Age ≥55 years</b>    |                       |                           |                          |                         |                      |                      |                                          |          |
| 1                                                          | Observational studies | Very serious <sup>1</sup> | No serious inconsistency | No serious indirectness | Serious <sup>2</sup> | None                 | OR 1.15 (0.51 to 2.59)                   | VERY LOW |

<sup>1</sup>Downgraded by 1 increment if the majority of the evidence was at high risk of bias and by 2 increments if the majority of the evidence was at very high risk of bias

<sup>2</sup>Downgraded by 1 increment if the 95% CI crossed the null line



**Table 16: Risk factor: Age <65 years – Outcome: Dependence diagnosis**

| Quality assessment                     |                       |                           |                          |                         |                        |                      | Adjusted effect       | Quality |
|----------------------------------------|-----------------------|---------------------------|--------------------------|-------------------------|------------------------|----------------------|-----------------------|---------|
| No of studies                          | Design                | Risk of bias              | Inconsistency            | Indirectness            | Imprecision            | Other considerations | Relative (95% CI)     |         |
| <b>life-time dependence diagnosis</b>  |                       |                           |                          |                         |                        |                      |                       |         |
| 1                                      | Observational studies | Very serious <sup>1</sup> | No serious inconsistency | No serious indirectness | No serious imprecision | None                 | OR 2.8 (1.83 to 4.28) | LOW     |
| <b>current dependence diagnosis</b>    |                       |                           |                          |                         |                        |                      |                       |         |
| 1                                      | Observational studies | Very serious <sup>1</sup> | No serious inconsistency | No serious indirectness | No serious imprecision | None                 | OR 2.33 (1.55 to 3.5) | LOW     |
| <b>Severity of lifetime dependence</b> |                       |                           |                          |                         |                        |                      |                       |         |
| 1                                      | Observational studies | Very serious <sup>1</sup> | No serious inconsistency | No serious indirectness | No serious imprecision | None                 | OR 2.7 (1.68 to 4.34) | LOW     |

<sup>1</sup>Downgraded by 1 increment if the majority of the evidence was at high risk of bias and by 2 increments if the majority of the evidence was at very high risk of bias

**Table 17: Risk factor: Age (referent: 18-44) – Outcome: Long-term opioid use (12 months)**

| Quality assessment                              |                       |                           |                          |                         |                        |                      | Adjusted effect        | Quality |
|-------------------------------------------------|-----------------------|---------------------------|--------------------------|-------------------------|------------------------|----------------------|------------------------|---------|
| No of studies                                   | Design                | Risk of bias              | Inconsistency            | Indirectness            | Imprecision            | Other considerations | Relative (95% CI)      |         |
| <b>Long-term opioid use (12 months) - 45-54</b> |                       |                           |                          |                         |                        |                      |                        |         |
| 1                                               | Observational studies | Very serious <sup>1</sup> | No serious inconsistency | No serious indirectness | No serious imprecision | None                 | OR 1.65 (1.54 to 1.77) | LOW     |
| <b>Long-term opioid use (12 months) - 55-64</b> |                       |                           |                          |                         |                        |                      |                        |         |
| 1                                               | Observational studies | Very serious <sup>1</sup> | No serious inconsistency | No serious indirectness | No serious imprecision | None                 | OR 1.75 (1.63 to 1.88) | LOW     |

| Long-term opioid use (12 months) - 65-74 |                       |                           |                          |                         |                        |      |                        |     |
|------------------------------------------|-----------------------|---------------------------|--------------------------|-------------------------|------------------------|------|------------------------|-----|
| 1                                        | Observational studies | Very serious <sup>1</sup> | No serious inconsistency | No serious indirectness | No serious imprecision | none | OR 1.47 (1.36 to 1.59) | LOW |
| Long-term opioid use (12 months) - ≥75   |                       |                           |                          |                         |                        |      |                        |     |
| 1                                        | Observational studies | Very serious <sup>1</sup> | No serious inconsistency | No serious indirectness | No serious imprecision | None | OR 2.45 (2.27 to 2.64) | LOW |

<sup>1</sup>Downgraded by 1 increment if the majority of the evidence was at high risk of bias and by 2 increments if the majority of the evidence was at very high risk of bias

**Table 18: Risk factor: Sex (referent: female) – Outcome: Long-term opioid use (12 months/persistent)**

| Quality assessment                                       |                       |                           |                          |                         |                        |                      | Adjusted effect        | Quality  |
|----------------------------------------------------------|-----------------------|---------------------------|--------------------------|-------------------------|------------------------|----------------------|------------------------|----------|
| No of studies                                            | Design                | Risk of bias              | Inconsistency            | Indirectness            | Imprecision            | Other considerations | Relative (95% CI)      |          |
| Long-term opioid use (12 months) - Long-term opioid use  |                       |                           |                          |                         |                        |                      |                        |          |
| 1                                                        | Observational studies | Very serious <sup>1</sup> | No serious inconsistency | No serious indirectness | Serious <sup>2</sup>   | None                 | OR 1.28 (0.79 to 2.07) | VERY LOW |
| Long-term opioid use (12 months) - Persistent opioid use |                       |                           |                          |                         |                        |                      |                        |          |
| 1                                                        | Observational studies | Very serious <sup>1</sup> | No serious inconsistency | No serious indirectness | No serious imprecision | None                 | OR 1.04 (0.99 to 1.09) | LOW      |

<sup>1</sup>Downgraded by 1 increment if the majority of the evidence was at high risk of bias and by 2 increments if the majority of the evidence was at very high risk of bias

<sup>2</sup>Downgraded by 1 increment if the 95% CI crossed the null line

**Table 19: Risk factor: Ethnicity (referent: white) – Outcome: Long-term opioid use (12 months)**

| Quality assessment                                 |                       |                           |                          |                         |                        |                      | Adjusted effect        | Quality  |
|----------------------------------------------------|-----------------------|---------------------------|--------------------------|-------------------------|------------------------|----------------------|------------------------|----------|
| No of studies                                      | Design                | Risk of bias              | Inconsistency            | Indirectness            | Imprecision            | Other considerations | Relative (95% CI)      |          |
| <b>Long-term opioid use (12 months) – Hispanic</b> |                       |                           |                          |                         |                        |                      |                        |          |
| 1                                                  | Observational studies | Very serious <sup>1</sup> | No serious inconsistency | No serious indirectness | No serious imprecision | None                 | OR 0.42 (0.19 to 0.93) | LOW      |
| <b>Long-term opioid use (12 months) – Other</b>    |                       |                           |                          |                         |                        |                      |                        |          |
| 1                                                  | Observational studies | Very serious <sup>1</sup> | No serious inconsistency | No serious indirectness | Serious <sup>2</sup>   | None                 | OR 0.73 (0.37 to 1.44) | VERY LOW |

<sup>1</sup>Downgraded by 1 increment if the majority of the evidence was at high risk of bias and by 2 increments if the majority of the evidence was at very high risk of bias

<sup>2</sup>Downgraded by 1 increment if the 95% CI crossed the null line

**Table 20: Risk factor: Education level (referent: High school) – Outcome: Long-term opioid use (12 months) (also reported by drinking status)**

| Quality assessment                                                |                       |                           |                          |                         |                      |                      | Adjusted effect       | Quality  |
|-------------------------------------------------------------------|-----------------------|---------------------------|--------------------------|-------------------------|----------------------|----------------------|-----------------------|----------|
| No of studies                                                     | Design                | Risk of bias              | Inconsistency            | Indirectness            | Imprecision          | Other considerations | Relative (95% CI)     |          |
| <b>Long-term opioid use (12 months) - &lt; high school</b>        |                       |                           |                          |                         |                      |                      |                       |          |
| 1                                                                 | Observational studies | Very serious <sup>1</sup> | No serious inconsistency | No serious indirectness | Serious <sup>2</sup> | None                 | OR 0.69 (0.34 to 1.4) | VERY LOW |
| <b>Long-term opioid use (12 months) - vocational/some college</b> |                       |                           |                          |                         |                      |                      |                       |          |
| 1                                                                 | Observational studies | Very serious <sup>1</sup> | No serious inconsistency | No serious indirectness | Serious <sup>2</sup> | None                 | OR 0.9 (0.55 to 1.47) | VERY LOW |
| <b>Long-term opioid use (12 months) - college graduate</b>        |                       |                           |                          |                         |                      |                      |                       |          |
| 1                                                                 | Observational studies | Very serious <sup>1</sup> | No serious inconsistency | No serious indirectness | Serious <sup>2</sup> | None                 | OR 0.58 (0.2 to 1.68) | VERY LOW |

| Opioid misuse (referent < high school) - Non-unhealthy drinkers |                       |                           |                          |                         |                      |      |                        |          |
|-----------------------------------------------------------------|-----------------------|---------------------------|--------------------------|-------------------------|----------------------|------|------------------------|----------|
| 1                                                               | Observational studies | Very serious <sup>1</sup> | No serious inconsistency | No serious indirectness | Serious <sup>2</sup> | None | OR 0.53 (0.21 to 1.34) | VERY LOW |
| Opioid misuse (referent < high school) - Unhealthy drinkers     |                       |                           |                          |                         |                      |      |                        |          |
| 1                                                               | Observational studies | Very serious <sup>1</sup> | No serious inconsistency | No serious indirectness | Serious <sup>2</sup> | None | OR 1.39 (0.25 to 7.73) | VERY LOW |

<sup>1</sup>Downgraded by 1 increment if the majority of the evidence was at high risk of bias and by 2 increments if the majority of the evidence was at very high risk of bias

<sup>2</sup>Downgraded by 1 increment if the 95% CI crossed the null line

**Table 21: Risk factor: Rural living (referent: urban living) – Outcome: Long-term opioid use (12 months) (reported by drinking status)**

| Quality assessment                     |                       |                           |                          |                         |                        |                      | Adjusted effect        | Quality  |
|----------------------------------------|-----------------------|---------------------------|--------------------------|-------------------------|------------------------|----------------------|------------------------|----------|
| No of studies                          | Design                | Risk of bias              | Inconsistency            | Indirectness            | Imprecision            | Other considerations | Relative (95% CI)      |          |
| Opioid misuse - Non-unhealthy drinkers |                       |                           |                          |                         |                        |                      |                        |          |
| 1                                      | Observational studies | Very serious <sup>1</sup> | No serious inconsistency | No serious indirectness | No serious imprecision | None                 | OR 0.39 (0.16 to 0.95) | LOW      |
| Opioid misuse - Unhealthy drinkers     |                       |                           |                          |                         |                        |                      |                        |          |
| 1                                      | Observational studies | Very serious <sup>1</sup> | No serious inconsistency | No serious indirectness | Serious <sup>2</sup>   | none                 | OR 0.76 (0.12 to 4.81) | VERY LOW |

<sup>1</sup>Downgraded by 1 increment if the majority of the evidence was at high risk of bias and by 2 increments if the majority of the evidence was at very high risk of bias

<sup>2</sup>Downgraded by 1 increment if the 95% CI crossed the null line

**Table 22: Risk factor: Employment (referent: no employment) – Outcome: Long-term opioid use (12 months) (reported by drinking status)**

| Quality assessment                            |                       |                           |                          |                         |                      |                      | Adjusted effect         | Quality  |
|-----------------------------------------------|-----------------------|---------------------------|--------------------------|-------------------------|----------------------|----------------------|-------------------------|----------|
| No of studies                                 | Design                | Risk of bias              | Inconsistency            | Indirectness            | Imprecision          | Other considerations | Relative (95% CI)       |          |
| <b>Opioid misuse - Non-unhealthy drinkers</b> |                       |                           |                          |                         |                      |                      |                         |          |
| 1                                             | Observational studies | Very serious <sup>1</sup> | No serious inconsistency | No serious indirectness | Serious <sup>2</sup> | None                 | OR 1.5 (0.53 to 4.25)   | VERY LOW |
| <b>Opioid misuse - Unhealthy drinkers</b>     |                       |                           |                          |                         |                      |                      |                         |          |
| 1                                             | Observational studies | Very serious <sup>1</sup> | No serious inconsistency | No serious indirectness | Serious <sup>2</sup> | None                 | OR 1.84 (0.31 to 10.92) | VERY LOW |

<sup>1</sup>Downgraded by 1 increment if the majority of the evidence was at high risk of bias and by 2 increments if the majority of the evidence was at very high risk of bias

<sup>2</sup>Downgraded by 1 increment if the 95% CI crossed the null line

**Table 23: Risk factor: First quarter morphine equivalent dose (referent: <1-899 mg) – Outcome: Long term opioid use (12 months)**

| Quality assessment                                     |                       |                           |                          |                         |                        |                      | Adjusted effect         | Quality |
|--------------------------------------------------------|-----------------------|---------------------------|--------------------------|-------------------------|------------------------|----------------------|-------------------------|---------|
| No of studies                                          | Design                | Risk of bias              | Inconsistency            | Indirectness            | Imprecision            | Other considerations | Relative (95% CI)       |         |
| <b>Long-term opioid use (12 months) - 900-1799 mg</b>  |                       |                           |                          |                         |                        |                      |                         |         |
| 1                                                      | Observational studies | Very serious <sup>1</sup> | No serious inconsistency | No serious indirectness | No serious imprecision | None                 | OR 4.01 (2.23 to 7.21)  | LOW     |
| <b>Long-term opioid use (12 months) - 1800-3599 mg</b> |                       |                           |                          |                         |                        |                      |                         |         |
| 1                                                      | Observational studies | Very serious <sup>1</sup> | No serious inconsistency | No serious indirectness | No serious imprecision | None                 | OR 5.46 (2.82 to 10.57) | LOW     |
| <b>Long-term opioid use (12 months) - &gt;3600 mg</b>  |                       |                           |                          |                         |                        |                      |                         |         |
| 1                                                      | Observational studies | Very serious <sup>1</sup> | No serious inconsistency | No serious indirectness | No serious imprecision | None                 | OR 6.25 (2.91 to 13.42) | LOW     |

<sup>1</sup>Downgraded by 1 increment if the majority of the evidence was at high risk of bias and by 2 increments if the majority of the evidence was at very high risk of bias

**Table 24: Risk factor: Total oral morphine equivalent dose (referent: <250mg) – Outcome: Long term opioid use (12 months)**

| Quality assessment                                   |                       |                           |                          |                         |                        |                      | Adjusted effect        | Quality |
|------------------------------------------------------|-----------------------|---------------------------|--------------------------|-------------------------|------------------------|----------------------|------------------------|---------|
| No of studies                                        | Design                | Risk of bias              | Inconsistency            | Indirectness            | Imprecision            | Other considerations | Relative (95% CI)      |         |
| <b>Long-term opioid use (12 months) - 250-499 mg</b> |                       |                           |                          |                         |                        |                      |                        |         |
| 1                                                    | Observational studies | Very serious <sup>1</sup> | No serious inconsistency | No serious indirectness | No serious imprecision | None                 | OR 2.02 (1.9 to 2.15)  | LOW     |
| <b>Long-term opioid use (12 months) - 500-749 mg</b> |                       |                           |                          |                         |                        |                      |                        |         |
| 1                                                    | Observational studies | Very serious <sup>1</sup> | No serious inconsistency | No serious indirectness | No serious imprecision | None                 | OR 2.27 (2.05 to 2.51) | LOW     |
| <b>Long-term opioid use (12 months) - ≥750 mg</b>    |                       |                           |                          |                         |                        |                      |                        |         |
| 1                                                    | Observational studies | Very serious <sup>1</sup> | No serious inconsistency | No serious indirectness | No serious imprecision | None                 | OR 3.68 (3.34 to 4.05) | LOW     |

<sup>1</sup>Downgraded by 1 increment if the majority of the evidence was at high risk of bias and by 2 increments if the majority of the evidence was at very high risk of bias

**Table 25: Risk factor: Highest quintile for opioid use (number of opioid orders over past 3 years) – Outcome: Life-time dependence diagnosis**

| Quality assessment                    |                       |                           |                          |                         |                        |                      | Adjusted effect       | Quality |
|---------------------------------------|-----------------------|---------------------------|--------------------------|-------------------------|------------------------|----------------------|-----------------------|---------|
| No of studies                         | Design                | Risk of bias              | Inconsistency            | Indirectness            | Imprecision            | Other considerations | Relative (95% CI)     |         |
| <b>life-time dependence diagnosis</b> |                       |                           |                          |                         |                        |                      |                       |         |
| 1                                     | Observational studies | Very serious <sup>1</sup> | No serious inconsistency | No serious indirectness | No serious imprecision | None                 | OR 1.75 (1.18 to 2.6) | LOW     |

<sup>1</sup>Downgraded by 1 increment if the majority of the evidence was at high risk of bias and by 2 increments if the majority of the evidence was at very high risk of bias

Table 26: Risk factor: &gt;90 days opioid treatment (Referent &lt;90 days) – Outcome abuse / overdose

| Quality assessment                             |                       |                           |                          |                         |                        |                      | Adjusted effect         | Quality  | Importance |
|------------------------------------------------|-----------------------|---------------------------|--------------------------|-------------------------|------------------------|----------------------|-------------------------|----------|------------|
| No of studies                                  | Design                | Risk of bias              | Inconsistency            | Indirectness            | Imprecision            | Other considerations | Relative (95% CI)       |          |            |
| <b>Opioid abuse</b>                            |                       |                           |                          |                         |                        |                      |                         |          |            |
| 1                                              | Observational studies | Very serious <sup>1</sup> | No serious inconsistency | No serious indirectness | Serious <sup>2</sup>   | None                 | HR 3.97 (0.87 to 18.12) | VERY LOW |            |
| <b>Opioid overdose</b>                         |                       |                           |                          |                         |                        |                      |                         |          |            |
| 1                                              | Observational studies | Very serious <sup>1</sup> | No serious inconsistency | No serious indirectness | No serious imprecision | None                 | HR 5.12 (1.63 to 16.08) | LOW      |            |
| <b>Opioid dependence</b>                       |                       |                           |                          |                         |                        |                      |                         |          |            |
| 1                                              | Observational studies | Very serious <sup>1</sup> | No serious inconsistency | No serious indirectness | No serious imprecision | None                 | HR 2.86 (1.54 to 5.31)  | LOW      |            |
| <b>Alcohol abuse</b>                           |                       |                           |                          |                         |                        |                      |                         |          |            |
| 1                                              | Observational studies | Very serious <sup>1</sup> | No serious inconsistency | No serious indirectness | Serious <sup>2</sup>   | None                 | HR 1.38 (0.9 to 2.12)   | VERY LOW |            |
| <b>Other substance abuse</b>                   |                       |                           |                          |                         |                        |                      |                         |          |            |
| 1                                              | Observational studies | Very serious <sup>1</sup> | No serious inconsistency | No serious indirectness | Serious <sup>2</sup>   | None                 | HR 1.81 (0.92 to 3.56)  | VERY LOW |            |
| <b>Non-opioid overdose</b>                     |                       |                           |                          |                         |                        |                      |                         |          |            |
| 1                                              | Observational studies | Very serious <sup>1</sup> | No serious inconsistency | No serious indirectness | Serious <sup>2</sup>   | None                 | HR 1.82 (0.92 to 3.6)   | VERY LOW |            |
| <b>Other substance (non-opioid) dependence</b> |                       |                           |                          |                         |                        |                      |                         |          |            |
| 1                                              | Observational studies | Very serious <sup>1</sup> | No serious inconsistency | No serious indirectness | No serious imprecision | None                 | HR 1.73 (1.21 to 2.47)  | LOW      |            |
| <b>Depression</b>                              |                       |                           |                          |                         |                        |                      |                         |          |            |

|              |                       |                           |                          |                         |                        |      |                        |          |
|--------------|-----------------------|---------------------------|--------------------------|-------------------------|------------------------|------|------------------------|----------|
| 1            | Observational studies | Very serious <sup>1</sup> | No serious inconsistency | No serious indirectness | No serious imprecision | None | HR 1.53 (1.29 to 1.81) | LOW      |
| <b>Death</b> |                       |                           |                          |                         |                        |      |                        |          |
| 1            | Observational studies | Very serious <sup>1</sup> | No serious inconsistency | No serious indirectness | Serious <sup>2</sup>   | None | HR 0.99 (0.84 to 1.17) | VERY LOW |

<sup>1</sup>Downgraded by 1 increment if the majority of the evidence was at high risk of bias and by 2 increments if the majority of the evidence was at very high risk of bias

<sup>2</sup>Downgraded by 1 increment if the 95% CI crossed the null line

**Table 27: Risk factor: History of opioid abuse (referent: no history) – Outcome: dependence diagnosis**

| Quality assessment                     |                       |                           |                          |                         |                        |                      | Adjusted effect        | Quality |
|----------------------------------------|-----------------------|---------------------------|--------------------------|-------------------------|------------------------|----------------------|------------------------|---------|
| No of studies                          | Design                | Risk of bias              | Inconsistency            | Indirectness            | Imprecision            | Other considerations | Relative (95% CI)      |         |
| <b>life-time dependence diagnosis</b>  |                       |                           |                          |                         |                        |                      |                        |         |
| 1                                      | Observational studies | Very serious <sup>1</sup> | No serious inconsistency | No serious indirectness | No serious imprecision | None                 | OR 3.95 (2.39 to 6.53) | LOW     |
| <b>current dependence diagnosis</b>    |                       |                           |                          |                         |                        |                      |                        |         |
| 1                                      | Observational studies | Very serious <sup>1</sup> | No serious inconsistency | No serious indirectness | No serious imprecision | None                 | OR 3.81 (2.56 to 5.67) | LOW     |
| <b>Severity of lifetime dependence</b> |                       |                           |                          |                         |                        |                      |                        |         |
| 1                                      | Observational studies | Very serious <sup>1</sup> | No serious inconsistency | No serious indirectness | No serious imprecision | None                 | OR 6.07 (4.05 to 9.1)  | LOW     |

<sup>1</sup>Downgraded by 1 increment if the majority of the evidence was at high risk of bias and by 2 increments if the majority of the evidence was at very high risk of bias



**Table 28: Risk factor: History of high dependence severity (referent: no history) - Outcome: dependence diagnosis**

| Quality assessment                     |                       |                           |                          |                         |                        |                      | Adjusted effect        | Quality |
|----------------------------------------|-----------------------|---------------------------|--------------------------|-------------------------|------------------------|----------------------|------------------------|---------|
| No of studies                          | Design                | Risk of bias              | Inconsistency            | Indirectness            | Imprecision            | Other considerations | Relative (95% CI)      |         |
| <b>life-time dependence diagnosis</b>  |                       |                           |                          |                         |                        |                      |                        |         |
| 1                                      | Observational studies | Very serious <sup>1</sup> | No serious inconsistency | No serious indirectness | No serious imprecision | None                 | OR 3 (1.58 to 5.7)     | LOW     |
| <b>current dependence diagnosis</b>    |                       |                           |                          |                         |                        |                      |                        |         |
| 1                                      | Observational studies | Very serious <sup>1</sup> | No serious inconsistency | No serious indirectness | No serious imprecision | None                 | OR 1.85 (1.38 to 2.48) | LOW     |
| <b>Severity of lifetime dependence</b> |                       |                           |                          |                         |                        |                      |                        |         |
| 1                                      | Observational studies | Very serious <sup>1</sup> | No serious inconsistency | No serious indirectness | No serious imprecision | None                 | OR 3.43 (2.29 to 5.14) | LOW     |

<sup>1</sup>Downgraded by 1 increment if the majority of the evidence was at high risk of bias and by 2 increments if the majority of the evidence was at very high risk of bias

**Table 29: Risk factor: History of illicit drug use (referent: no history) - Outcome: dependence diagnosis**

| Quality assessment                     |                       |                           |                          |                         |                        |                      | Adjusted effect        | Quality |
|----------------------------------------|-----------------------|---------------------------|--------------------------|-------------------------|------------------------|----------------------|------------------------|---------|
| No of studies                          | Design                | Risk of bias              | Inconsistency            | Indirectness            | Imprecision            | Other considerations | Relative (95% CI)      |         |
| <b>Severity of lifetime dependence</b> |                       |                           |                          |                         |                        |                      |                        |         |
| 1                                      | Observational studies | Very serious <sup>1</sup> | No serious inconsistency | No serious indirectness | No serious imprecision | None                 | OR 0.75 (0.59 to 0.95) | LOW     |

<sup>1</sup>Downgraded by 1 increment if the majority of the evidence was at high risk of bias and by 2 increments if the majority of the evidence was at very high risk of bias

**Table 30: Risk factor: History of illicit drug use (referent: no history) – Outcome: opioid misuse (reported by drinking status)**

| Quality assessment                            |                       |                           |                          |                         |                        |                      | Adjusted effect          | Quality |
|-----------------------------------------------|-----------------------|---------------------------|--------------------------|-------------------------|------------------------|----------------------|--------------------------|---------|
| No of studies                                 | Design                | Risk of bias              | Inconsistency            | Indirectness            | Imprecision            | Other considerations | Relative (95% CI)        |         |
| <b>Opioid misuse - Non-unhealthy drinkers</b> |                       |                           |                          |                         |                        |                      |                          |         |
| 1                                             | Observational studies | Very serious <sup>1</sup> | No serious inconsistency | No serious indirectness | No serious imprecision | None                 | OR 5.2 (1.47 to 18.4)    | LOW     |
| <b>Opioid misuse - Unhealthy drinkers</b>     |                       |                           |                          |                         |                        |                      |                          |         |
| 1                                             | Observational studies | Very serious <sup>1</sup> | No serious inconsistency | No serious indirectness | No serious imprecision | None                 | OR 12.14 (1.64 to 89.87) | LOW     |

<sup>1</sup>Downgraded by 1 increment if the majority of the evidence was at high risk of bias and by 2 increments if the majority of the evidence was at very high risk of bias

**Table 31: Risk factor: History of substance use disorder (referent: no SUD) - Outcome: illicit drug use (problematic opioid use\*)**

| Quality assessment                     |                       |                           |                          |                         |                      |                      | Adjusted effect        | Quality  |
|----------------------------------------|-----------------------|---------------------------|--------------------------|-------------------------|----------------------|----------------------|------------------------|----------|
| No of studies                          | Design                | Risk of bias              | Inconsistency            | Indirectness            | Imprecision          | Other considerations | Relative (95% CI)      |          |
| <b>Severity of lifetime dependence</b> |                       |                           |                          |                         |                      |                      |                        |          |
| 1                                      | Observational studies | Very serious <sup>1</sup> | No serious inconsistency | No serious indirectness | Serious <sup>2</sup> | None                 | OR 2.50 (0.98 to 6.38) | VERY LOW |

<sup>1</sup>Downgraded by 1 increment if the majority of the evidence was at high risk of bias and by 2 increments if the majority of the evidence was at very high risk of bias

<sup>2</sup>Downgraded by 1 increment if the 95% CI crossed the null line

\*Problematic opioid use was defined as a positive urine toxicology for substances not prescribed by a physician (amphetamines, benzodiazepines, barbiturates, cannabinoids, cocaine, methadone, opiates phencyclidine, propoxyphene) or a current substance abuse or dependence diagnosis for any substance.

**Table 32: Risk factor: History of substance use disorder (referent: no SUD) – Outcome: dependence**

| Quality assessment                                    |                       |                           |                          |                         |                        |                      | Adjusted effect       | Quality  |
|-------------------------------------------------------|-----------------------|---------------------------|--------------------------|-------------------------|------------------------|----------------------|-----------------------|----------|
| No of studies                                         | Design                | Risk of bias              | Inconsistency            | Indirectness            | Imprecision            | Other considerations | Relative (95% CI)     |          |
| <b>Dependence - Borrowed pain medication</b>          |                       |                           |                          |                         |                        |                      |                       |          |
| 1                                                     | Observational studies | Very serious <sup>1</sup> | No serious inconsistency | No serious indirectness | No serious imprecision | None                 | OR 6.62 (1.4 to 31.3) | LOW      |
| <b>Dependence - Need to take more than prescribed</b> |                       |                           |                          |                         |                        |                      |                       |          |
| 1                                                     | Observational studies | Very serious <sup>1</sup> | No serious inconsistency | No serious indirectness | No serious imprecision | None                 | OR 1.38 (0.6 to 3.17) | LOW      |
| <b>Dependence - Asked for prescription increase</b>   |                       |                           |                          |                         |                        |                      |                       |          |
| 1                                                     | Observational studies | Very serious <sup>1</sup> | No serious inconsistency | No serious indirectness | serious <sup>2</sup>   | None                 | OR 1.12 (0.5 to 2.51) | VERY LOW |
| <b>Dependence - Early refill</b>                      |                       |                           |                          |                         |                        |                      |                       |          |
| 1                                                     | Observational studies | Very serious <sup>1</sup> | No serious inconsistency | No serious indirectness | No serious imprecision | None                 | OR 3.86 (1.5 to 9.93) | LOW      |
| <b>Dependence - Misplaced prescription</b>            |                       |                           |                          |                         |                        |                      |                       |          |
| 1                                                     | Observational studies | Very serious <sup>1</sup> | No serious inconsistency | No serious indirectness | serious <sup>2</sup>   | None                 | OR 0.78 (0.2 to 3.04) | VERY LOW |

<sup>1</sup>Downgraded by 1 increment if the majority of the evidence was at high risk of bias and by 2 increments if the majority of the evidence was at very high risk of bias

<sup>2</sup>Downgraded by 1 increment if the 95% CI crossed the null line

**Table 33: Risk factor: History of substance abuse treatment (referent: no treatment) – Outcome: Severity of lifetime dependence**

| Quality assessment                     |                       |                           |                          |                         |                        |                      | Adjusted effect        | Quality |
|----------------------------------------|-----------------------|---------------------------|--------------------------|-------------------------|------------------------|----------------------|------------------------|---------|
| No of studies                          | Design                | Risk of bias              | Inconsistency            | Indirectness            | Imprecision            | Other considerations | Relative (95% CI)      |         |
| <b>Severity of lifetime dependence</b> |                       |                           |                          |                         |                        |                      |                        |         |
| 1                                      | Observational studies | Very serious <sup>1</sup> | No serious inconsistency | No serious indirectness | No serious imprecision | None                 | OR 1.93 (1.51 to 2.47) | LOW     |

<sup>1</sup>Downgraded by 1 increment if the majority of the evidence was at high risk of bias and by 2 increments if the majority of the evidence was at very high risk of bias

**Table 34: Risk factor: Alcohol dependence (referent: no alcohol dependence) – Outcome: Long term / persistent opioid use**

| Quality assessment                                                               |                       |                           |                          |                         |                        |                      | Adjusted effect        | Quality  |
|----------------------------------------------------------------------------------|-----------------------|---------------------------|--------------------------|-------------------------|------------------------|----------------------|------------------------|----------|
| No of studies                                                                    | Design                | Risk of bias              | Inconsistency            | Indirectness            | Imprecision            | Other considerations | Relative (95% CI)      |          |
| <b>Long-term opioid use (12 months) - Long-term opioid use (12 months)</b>       |                       |                           |                          |                         |                        |                      |                        |          |
| 1                                                                                | Observational studies | Very serious <sup>1</sup> | No serious inconsistency | No serious indirectness | Serious <sup>2</sup>   | None                 | OR 2.17 (0.79 to 5.96) | VERY LOW |
| <b>Long-term opioid use (12 months) - Persistent opioid use during 12 months</b> |                       |                           |                          |                         |                        |                      |                        |          |
| 1                                                                                | Observational studies | Very serious <sup>1</sup> | No serious inconsistency | No serious indirectness | No serious imprecision | None                 | OR 1.18 (0.84 to 1.66) | LOW      |

<sup>1</sup>Downgraded by 1 increment if the majority of the evidence was at high risk of bias and by 2 increments if the majority of the evidence was at very high risk of bias

<sup>2</sup>Downgraded by 1 increment if the 95% CI crossed the null line

**Table 35: Nicotine dependence (referent: no nicotine dependence) - Outcome: persistent opioid use during 12 months**

| Quality assessment                            |                       |                           |                          |                         |                        |                      | Adjusted effect        | Quality |
|-----------------------------------------------|-----------------------|---------------------------|--------------------------|-------------------------|------------------------|----------------------|------------------------|---------|
| No of studies                                 | Design                | Risk of bias              | Inconsistency            | Indirectness            | Imprecision            | Other considerations | Relative (95% CI)      |         |
| <b>Persistent opioid use during 12 months</b> |                       |                           |                          |                         |                        |                      |                        |         |
| 1                                             | Observational studies | Very serious <sup>1</sup> | No serious inconsistency | No serious indirectness | No serious imprecision | None                 | OR 1.65 (1.48 to 1.84) | LOW     |

<sup>1</sup>Downgraded by 1 increment if the majority of the evidence was at high risk of bias and by 2 increments if the majority of the evidence was at very high risk of bias

**Table 36: Risk factor: Pain interferes with life/work – Outcome: opioid misuse**

| Quality assessment                   |                       |                           |                          |                         |                        |                      | Adjusted effect        | Quality  |
|--------------------------------------|-----------------------|---------------------------|--------------------------|-------------------------|------------------------|----------------------|------------------------|----------|
| No of studies                        | Design                | Risk of bias              | Inconsistency            | Indirectness            | Imprecision            | Other considerations | Relative (95% CI)      |          |
| <b>Lifetime dependence diagnosis</b> |                       |                           |                          |                         |                        |                      |                        |          |
| 1                                    | Observational studies | Very serious <sup>1</sup> | No serious inconsistency | No serious indirectness | No serious imprecision | None                 | OR 1.94 (1.21 to 3.11) | LOW      |
| <b>Current dependence diagnosis</b>  |                       |                           |                          |                         |                        |                      |                        |          |
| 1                                    | Observational studies | Very serious <sup>1</sup> | No serious inconsistency | No serious indirectness | serious <sup>2</sup>   | None                 | OR 1.54 (0.94 to 2.52) | VERY LOW |

<sup>1</sup>Downgraded by 1 increment if the majority of the evidence was at high risk of bias and by 2 increments if the majority of the evidence was at very high risk of bias

<sup>2</sup>Downgraded by 1 increment if the 95% CI crossed the null line

**Table 37: Risk factor: Pain interferes with life/work – Outcome: opioid misuse (reported by drinking status)**

| Quality assessment                            |                       |                           |                          |                         |                      |                      | Adjusted effect        | Quality  |
|-----------------------------------------------|-----------------------|---------------------------|--------------------------|-------------------------|----------------------|----------------------|------------------------|----------|
| No of studies                                 | Design                | Risk of bias              | Inconsistency            | Indirectness            | Imprecision          | Other considerations | Relative (95% CI)      |          |
| <b>Opioid misuse - Non-unhealthy drinkers</b> |                       |                           |                          |                         |                      |                      |                        |          |
| 1                                             | Observational studies | Very serious <sup>1</sup> | No serious inconsistency | No serious indirectness | serious <sup>2</sup> | None                 | OR 1.37 (0.86 to 2.18) | VERY LOW |
| <b>Opioid misuse - Unhealthy drinkers</b>     |                       |                           |                          |                         |                      |                      |                        |          |
| 1                                             | Observational studies | Very serious <sup>1</sup> | No serious inconsistency | No serious indirectness | serious <sup>2</sup> | None                 | OR 1.31 (0.53 to 3.24) | VERY LOW |

<sup>1</sup>Downgraded by 1 increment if the majority of the evidence was at high risk of bias and by 2 increments if the majority of the evidence was at very high risk of bias

<sup>2</sup>Downgraded by 1 increment if the 95% CI crossed the null line

**Table 38: Risk factor: Pain intensity at baseline on 0-10 scale (referent 0-4) – Outcome: Long-term opioid use (12 months)**

| Quality assessment                             |                       |                           |                          |                         |                        |                      | Absolute effect         | Quality |
|------------------------------------------------|-----------------------|---------------------------|--------------------------|-------------------------|------------------------|----------------------|-------------------------|---------|
| No of studies                                  | Design                | Risk of bias              | Inconsistency            | Indirectness            | Imprecision            | Other considerations | Relative (95% CI)       |         |
| <b>Long-term opioid use (12 months) - 5-7</b>  |                       |                           |                          |                         |                        |                      |                         |         |
| 1                                              | Observational studies | Very serious <sup>1</sup> | No serious inconsistency | No serious indirectness | No serious imprecision | None                 | OR 5.88 (1.71 to 20.22) | LOW     |
| <b>Long-term opioid use (12 months) - 8-10</b> |                       |                           |                          |                         |                        |                      |                         |         |
| 1                                              | Observational studies | Very serious <sup>1</sup> | No serious inconsistency | No serious indirectness | No serious imprecision | None                 | OR 9.41 (2.69 to 32.92) | LOW     |

<sup>1</sup>Downgraded by 1 increment if the majority of the evidence was at high risk of bias and by 2 increments if the majority of the evidence was at very high risk of bias

**Table 39: Risk factor: Back injury severity (referent: mild sprain) – Outcome: long term opioid use (12 months)**

| Quality assessment                                      |                       |                           |                          |                         |                        |                      | Adjusted effect        | Quality  |
|---------------------------------------------------------|-----------------------|---------------------------|--------------------------|-------------------------|------------------------|----------------------|------------------------|----------|
| No of studies                                           | Design                | Risk of bias              | Inconsistency            | Indirectness            | Imprecision            | Other considerations | Relative (95% CI)      |          |
| <b>Long-term opioid use (12 months) - severe sprain</b> |                       |                           |                          |                         |                        |                      |                        |          |
| 1                                                       | Observational studies | Very serious <sup>1</sup> | No serious inconsistency | No serious indirectness | Serious <sup>2</sup>   | None                 | OR 1.06 (0.52 to 2.16) | VERY LOW |
| <b>Long-term opioid use (12 months) – radiculopathy</b> |                       |                           |                          |                         |                        |                      |                        |          |
| 1                                                       | Observational studies | Very serious <sup>1</sup> | No serious inconsistency | No serious indirectness | No serious imprecision | None                 | OR 3.17 (1.83 to 5.49) | LOW      |

<sup>1</sup>Downgraded by 1 increment if the majority of the evidence was at high risk of bias and by 2 increments if the majority of the evidence was at very high risk of bias

<sup>2</sup>Downgraded by 1 increment if the 95% CI crossed the null line

**Table 40: Risk factor: Recovery expectations (referent: very high) – Outcome: long term opioid use (12 months)**

| Quality assessment                                   |                       |                           |                          |                         |                        |                      | Adjusted effect        | Quality  |
|------------------------------------------------------|-----------------------|---------------------------|--------------------------|-------------------------|------------------------|----------------------|------------------------|----------|
| No of studies                                        | Design                | Risk of bias              | Inconsistency            | Indirectness            | Imprecision            | Other considerations | Relative (95% CI)      |          |
| <b>Long-term opioid use (12 months) – High</b>       |                       |                           |                          |                         |                        |                      |                        |          |
| 1                                                    | Observational studies | Very serious <sup>1</sup> | No serious inconsistency | No serious indirectness | Serious <sup>2</sup>   | None                 | OR 1.33 (0.71 to 2.49) | VERY LOW |
| <b>Long-term opioid use (12 months) – Low</b>        |                       |                           |                          |                         |                        |                      |                        |          |
| 1                                                    | Observational studies | Very serious <sup>1</sup> | No serious inconsistency | No serious indirectness | No serious imprecision | None                 | OR 1.88 (1.09 to 3.24) | LOW      |
| <b>Long-term opioid use (12 months) - Don't know</b> |                       |                           |                          |                         |                        |                      |                        |          |
| 1                                                    | Observational studies | Very serious <sup>1</sup> | No serious inconsistency | No serious indirectness | No serious imprecision | None                 | OR 3.05 (1.07 to 8.69) | LOW      |

<sup>1</sup>Downgraded by 1 increment if the majority of the evidence was at high risk of bias and by 2 increments if the majority of the evidence was at very high risk of bias

<sup>2</sup>Downgraded by 1 increment if the 95% CI crossed the null line

**Table 41: Risk factor: Positive screen for antisocial personality (referent: negative screen) – Outcome: Dependence diagnosis / severity**

| Quality assessment                     |                       |                           |                          |                         |                        |                      | Adjusted effect        | Quality |
|----------------------------------------|-----------------------|---------------------------|--------------------------|-------------------------|------------------------|----------------------|------------------------|---------|
| No of studies                          | Design                | Risk of bias              | Inconsistency            | Indirectness            | Imprecision            | Other considerations | Relative (95% CI)      |         |
| <b>life-time dependence diagnosis</b>  |                       |                           |                          |                         |                        |                      |                        |         |
| 1                                      | Observational studies | Very serious <sup>1</sup> | No serious inconsistency | No serious indirectness | No serious imprecision | None                 | OR 1.44 (1.09 to 1.9)  | LOW     |
| <b>Severity of lifetime dependence</b> |                       |                           |                          |                         |                        |                      |                        |         |
| 1                                      | Observational studies | Very serious <sup>1</sup> | No serious inconsistency | No serious indirectness | No serious imprecision | None                 | OR 1.61 (1.19 to 2.18) | LOW     |

<sup>1</sup>Downgraded by 1 increment if the majority of the evidence was at high risk of bias and by 2 increments if the majority of the evidence was at very high risk of bias

**Table 42: Risk factor: History of major depression (referent: no history) – Outcome: Current dependence diagnosis**

| Quality assessment                  |                       |                           |                          |                         |                        |                      | Adjusted effect        | Quality |
|-------------------------------------|-----------------------|---------------------------|--------------------------|-------------------------|------------------------|----------------------|------------------------|---------|
| No of studies                       | Design                | Risk of bias              | Inconsistency            | Indirectness            | Imprecision            | Other considerations | Relative (95% CI)      |         |
| <b>current dependence diagnosis</b> |                       |                           |                          |                         |                        |                      |                        |         |
| 1                                   | Observational studies | Very serious <sup>1</sup> | No serious inconsistency | No serious indirectness | No serious imprecision | None                 | OR 1.29 (1.05 to 1.58) | LOW     |

<sup>1</sup>Downgraded by 1 increment if the majority of the evidence was at high risk of bias and by 2 increments if the majority of the evidence was at very high risk of bias

**Table 43: Risk factor: Current use of psychotropic medications (referent: no use) - Outcome: Dependence diagnosis / severity**

| Quality assessment                     |                       |                           |                          |                         |                        |                      | Adjusted effect        | Quality |
|----------------------------------------|-----------------------|---------------------------|--------------------------|-------------------------|------------------------|----------------------|------------------------|---------|
| No of studies                          | Design                | Risk of bias              | Inconsistency            | Indirectness            | Imprecision            | Other considerations | Relative (95% CI)      |         |
| <b>current dependence diagnosis</b>    |                       |                           |                          |                         |                        |                      |                        |         |
| 1                                      | Observational studies | Very serious <sup>1</sup> | No serious inconsistency | No serious indirectness | No serious imprecision | None                 | OR 1.73 (1.21 to 2.47) | LOW     |
| <b>Severity of lifetime dependence</b> |                       |                           |                          |                         |                        |                      |                        |         |
| 1                                      | Observational studies | Very serious <sup>1</sup> | No serious inconsistency | No serious indirectness | No serious imprecision | None                 | OR 1.53 (1.08 to 2.17) | LOW     |

<sup>1</sup>Downgraded by 1 increment if the majority of the evidence was at high risk of bias and by 2 increments if the majority of the evidence was at very high risk of bias



**Table 44: Risk factor: Current non-substance related psychiatric disorder (referent: no psychiatric disorder) – Outcome: illicit drug use (problematic opioid use\*)**

| Quality assessment      |                       |                           |                          |                         |                        |                      | Adjusted effect      | Quality |
|-------------------------|-----------------------|---------------------------|--------------------------|-------------------------|------------------------|----------------------|----------------------|---------|
| No of studies           | Design                | Risk of bias              | Inconsistency            | Indirectness            | Imprecision            | Other considerations | Relative (95% CI)    |         |
| <b>illicit drug use</b> |                       |                           |                          |                         |                        |                      |                      |         |
| 1                       | Observational studies | Very serious <sup>1</sup> | No serious inconsistency | No serious indirectness | No serious imprecision | None                 | OR 3.1 (1.5 to 6.41) | LOW     |

<sup>1</sup>Downgraded by 1 increment if the majority of the evidence was at high risk of bias and by 2 increments if the majority of the evidence was at very high risk of bias

\*Problematic opioid use was defined as a positive urine toxicology for substances not prescribed by a physician (amphetamines, benzodiazepines, barbiturates, cannabinoids, cocaine, methadone, opiates phencyclidine, propoxyphene) or a current substance abuse or dependence diagnosis for any substance.

**Table 45: Risk factor: Mental health on short form-36 (SF-36) subscale (referent: at or above population mean) – Outcome: long term opioid use (12 months)**

| Quality assessment                                            |                       |                           |                          |                         |                      |                      | Adjusted effect        | Quality  |
|---------------------------------------------------------------|-----------------------|---------------------------|--------------------------|-------------------------|----------------------|----------------------|------------------------|----------|
| No of studies                                                 | Design                | Risk of bias              | Inconsistency            | Indirectness            | Imprecision          | Other considerations | Relative (95% CI)      |          |
| <b>Long-term opioid use (12 months) - 1-2 SD below mean</b>   |                       |                           |                          |                         |                      |                      |                        |          |
| 1                                                             | Observational studies | Very serious <sup>1</sup> | No serious inconsistency | No serious indirectness | Serious <sup>2</sup> | None                 | OR 1.33 (0.66 to 2.68) | VERY LOW |
| <b>Long-term opioid use (12 months) - &lt;2 SD below mean</b> |                       |                           |                          |                         |                      |                      |                        |          |
| 1                                                             | Observational studies | Very serious <sup>1</sup> | No serious inconsistency | No serious indirectness | Serious <sup>2</sup> | None                 | OR 1.37 (0.67 to 2.8)  | VERY LOW |

<sup>1</sup>Downgraded by 1 increment if the majority of the evidence was at high risk of bias and by 2 increments if the majority of the evidence was at very high risk of bias

<sup>2</sup>Downgraded by 1 increment if the 95% CI crossed the null line

**Table 46: Risk factor: Mental health diagnosis (referent: no diagnosis) – Outcome: high risk opioid behaviour (early opioid refills) / concurrent sedative hypnotics**

| Quality assessment                                            |                       |                           |                          |                         |                        |                      | Adjusted effect        | Quality |
|---------------------------------------------------------------|-----------------------|---------------------------|--------------------------|-------------------------|------------------------|----------------------|------------------------|---------|
| No of studies                                                 | Design                | Risk of bias              | Inconsistency            | Indirectness            | Imprecision            | Other considerations | Relative (95% CI)      |         |
| <b>Early opioid refills - diagnosis without PTSD</b>          |                       |                           |                          |                         |                        |                      |                        |         |
| 1                                                             | Observational studies | Very serious <sup>1</sup> | No serious inconsistency | No serious indirectness | No serious imprecision | None                 | OR 1.5 (1.39 to 1.62)  | LOW     |
| <b>Early opioid refills - PTSD ± other diagnosis</b>          |                       |                           |                          |                         |                        |                      |                        |         |
| 1                                                             | Observational studies | Very serious <sup>1</sup> | No serious inconsistency | No serious indirectness | No serious imprecision | None                 | OR 1.64 (1.53 to 1.76) | LOW     |
| <b>Concurrent sedative hypnotics - diagnosis without PTSD</b> |                       |                           |                          |                         |                        |                      |                        |         |
| 1                                                             | Observational studies | Very serious <sup>1</sup> | No serious inconsistency | No serious indirectness | No serious imprecision | None                 | OR 3.23 (2.87 to 3.64) | LOW     |
| <b>Concurrent sedative hypnotics - PTSD ± other diagnosis</b> |                       |                           |                          |                         |                        |                      |                        |         |
| 1                                                             | Observational studies | Very serious <sup>1</sup> | No serious inconsistency | No serious indirectness | No serious imprecision | None                 | OR 5.46 (4.91 to 6.07) | LOW     |

<sup>1</sup>Downgraded by 1 increment if the majority of the evidence was at high risk of bias and by 2 increments if the majority of the evidence was at very high risk of bias

**Table 47: Risk factor: Mental health diagnosis (referent: no diagnosis) – Outcome: persistent use over 12 months**

| Quality assessment                                   |                       |                           |                          |                         |                        |                      | Adjusted effect        | Quality |
|------------------------------------------------------|-----------------------|---------------------------|--------------------------|-------------------------|------------------------|----------------------|------------------------|---------|
| No of studies                                        | Design                | Risk of bias              | Inconsistency            | Indirectness            | Imprecision            | Other considerations | Relative (95% CI)      |         |
| <b>Early opioid refills - diagnosis without PTSD</b> |                       |                           |                          |                         |                        |                      |                        |         |
| 1                                                    | Observational studies | Very serious <sup>1</sup> | No serious inconsistency | No serious indirectness | No serious imprecision | None                 | OR 2.01 (1.87 to 2.16) | LOW     |

<sup>1</sup>Downgraded by 1 increment if the majority of the evidence was at high risk of bias and by 2 increments if the majority of the evidence was at very high risk of bias

**Table 48: PTSD diagnosis (referent: no PTSD diagnosis) - opioid misuse (reported by drinking status)**

| Quality assessment                            |                       |                           |                          |                         |                        |                      | Adjusted effect        | Quality  |
|-----------------------------------------------|-----------------------|---------------------------|--------------------------|-------------------------|------------------------|----------------------|------------------------|----------|
| No of studies                                 | Design                | Risk of bias              | Inconsistency            | Indirectness            | Imprecision            | Other considerations | Relative (95% CI)      |          |
| <b>Opioid misuse - Non-unhealthy drinkers</b> |                       |                           |                          |                         |                        |                      |                        |          |
| 1                                             | Observational studies | Very serious <sup>1</sup> | No serious inconsistency | No serious indirectness | Serious <sup>2</sup>   | None                 | OR 2.32 (0.88 to 6.12) | VERY LOW |
| <b>Opioid misuse - Unhealthy drinkers</b>     |                       |                           |                          |                         |                        |                      |                        |          |
| 1                                             | Observational studies | Very serious <sup>1</sup> | No serious inconsistency | No serious indirectness | No serious imprecision | None                 | OR 9.77 (1.7 to 56.15) | LOW      |

<sup>1</sup>Downgraded by 1 increment if the majority of the evidence was at high risk of bias and by 2 increments if the majority of the evidence was at very high risk of bias

<sup>2</sup>Downgraded by 1 increment if the 95% CI crossed the null line

**Table 49: Risk factor: Depression (referent: no depression) – Outcome: prescription overuse / persistent use**

| Quality assessment          |                       |                           |                          |                         |                        |                      | Adjusted effect        | Quality  |
|-----------------------------|-----------------------|---------------------------|--------------------------|-------------------------|------------------------|----------------------|------------------------|----------|
| No of studies               | Design                | Risk of bias              | Inconsistency            | Indirectness            | Imprecision            | Other considerations | Relative (95% CI)      |          |
| <b>Prescription overuse</b> |                       |                           |                          |                         |                        |                      |                        |          |
| 1                           | Observational studies | Very serious <sup>1</sup> | No serious inconsistency | Serious <sup>2</sup>    | Serious <sup>3</sup>   | None                 | OR 1.13 (0.98 to 1.30) | VERY LOW |
| <b>Persistent use</b>       |                       |                           |                          |                         |                        |                      |                        |          |
| 1                           | Observational studies | Very serious <sup>1</sup> | No serious inconsistency | No serious indirectness | No serious imprecision | None                 | OR 1.59 (1.52 to 1.66) | LOW      |

<sup>1</sup>Downgraded by 1 increment if the majority of the evidence was at high risk of bias and by 2 increments if the majority of the evidence was at very high risk of bias

<sup>2</sup> Downgraded by 1 increment due to intervention indirectness as not all of the participants were receiving opioids (only 80%)

<sup>3</sup>Downgraded by 1 increment if the 95% CI crossed the null line

**Table 50: Risk factor: Depression (referent: no depression) – Outcome: opioid misuse (reported by drinking status)**

| Quality assessment                            |                       |                           |                          |                         |                        |                      | Adjusted effect        | Quality  |
|-----------------------------------------------|-----------------------|---------------------------|--------------------------|-------------------------|------------------------|----------------------|------------------------|----------|
| No of studies                                 | Design                | Risk of bias              | Inconsistency            | Indirectness            | Imprecision            | Other considerations | Relative (95% CI)      |          |
| <b>Opioid misuse - Non-unhealthy drinkers</b> |                       |                           |                          |                         |                        |                      |                        |          |
| 1                                             | Observational studies | Very serious <sup>1</sup> | No serious inconsistency | No serious indirectness | No serious imprecision | None                 | OR 3.1 (1.23 to 7.81)  | LOW      |
| <b>Opioid misuse - Unhealthy drinkers</b>     |                       |                           |                          |                         |                        |                      |                        |          |
| 1                                             | Observational studies | Very serious <sup>1</sup> | No serious inconsistency | No serious indirectness | Serious <sup>2</sup>   | None                 | OR 0.97 (0.15 to 6.27) | VERY LOW |

<sup>1</sup>Downgraded by 1 increment if the majority of the evidence was at high risk of bias and by 2 increments if the majority of the evidence was at very high risk of bias

<sup>2</sup>Downgraded by 1 increment if the 95% CI crossed the null line

**Table 51: Risk factor: Psychological catastrophising (referent: low catastrophising) – Outcome: long term opioid use (12 months)**

| Quality assessment                                 |                       |                           |                          |                         |                        |                      | Adjusted effect        | Quality  |
|----------------------------------------------------|-----------------------|---------------------------|--------------------------|-------------------------|------------------------|----------------------|------------------------|----------|
| No of studies                                      | Design                | Risk of bias              | Inconsistency            | Indirectness            | Imprecision            | Other considerations | Relative (95% CI)      |          |
| <b>Long-term opioid use (12 months) – Moderate</b> |                       |                           |                          |                         |                        |                      |                        |          |
| 1                                                  | Observational studies | Very serious <sup>1</sup> | No serious inconsistency | No serious indirectness | Serious <sup>2</sup>   | None                 | OR 0.98 (0.51 to 1.88) | VERY LOW |
| <b>Long-term opioid use (12 months) – High</b>     |                       |                           |                          |                         |                        |                      |                        |          |
| 1                                                  | Observational studies | Very serious <sup>1</sup> | No serious inconsistency | No serious indirectness | No serious imprecision | None                 | OR 2.11 (1.11 to 4.01) | LOW      |

<sup>1</sup>Downgraded by 1 increment if the majority of the evidence was at high risk of bias and by 2 increments if the majority of the evidence was at very high risk of bias

<sup>2</sup>Downgraded by 1 increment if the 95% CI crossed the null line

**Table 52: Risk factor: Function (Roland Morris Disability Questionnaire) (referent 0-12) – Outcome: long term opioid use (12 months)**

| Quality assessment                              |                       |                           |                          |                         |                        |                      | Adjusted effect       | Quality  |
|-------------------------------------------------|-----------------------|---------------------------|--------------------------|-------------------------|------------------------|----------------------|-----------------------|----------|
| No of studies                                   | Design                | Risk of bias              | Inconsistency            | Indirectness            | Imprecision            | Other considerations | Relative (95% CI)     |          |
| <b>Long-term opioid use (12 months) - 13-17</b> |                       |                           |                          |                         |                        |                      |                       |          |
| 1                                               | Observational studies | Very serious <sup>1</sup> | No serious inconsistency | No serious indirectness | Serious <sup>2</sup>   | None                 | OR 1.8 (0.76 to 4.26) | VERY LOW |
| <b>Long-term opioid use (12 months) - 18-24</b> |                       |                           |                          |                         |                        |                      |                       |          |
| 1                                               | Observational studies | Very serious <sup>1</sup> | No serious inconsistency | No serious indirectness | No serious imprecision | None                 | OR 2.65 (1.2 to 5.85) | LOW      |

<sup>1</sup>Downgraded by 1 increment if the majority of the evidence was at high risk of bias and by 2 increments if the majority of the evidence was at very high risk of bias

<sup>2</sup>Downgraded by 1 increment if the 95% CI crossed the null line

**Table 53: Risk factor: Number of prescribed analgesics (continuous variable) – Outcome: Prescription overuse**

| Quality assessment          |                       |                           |                          |                      |                      |                      | Adjusted effect        | Quality  |
|-----------------------------|-----------------------|---------------------------|--------------------------|----------------------|----------------------|----------------------|------------------------|----------|
| No of studies               | Design                | Risk of bias              | Inconsistency            | Indirectness         | Imprecision          | Other considerations | Relative (95% CI)      |          |
| <b>Prescription overuse</b> |                       |                           |                          |                      |                      |                      |                        |          |
| 1                           | Observational studies | Very serious <sup>1</sup> | No serious inconsistency | Serious <sup>2</sup> | Serious <sup>3</sup> | None                 | OR 1.64 (1.03 to 2.62) | VERY LOW |

<sup>1</sup>Downgraded by 1 increment if the majority of the evidence was at high risk of bias and by 2 increments if the majority of the evidence was at very high risk of bias

<sup>2</sup>Downgraded by 1 increment because 20% of the sample were prescribed non-opioid analgesics

<sup>3</sup>Downgraded <sup>2</sup>Downgraded by 1 increment if the 95% CI crossed the null line

**Table 54: Risk factor: Prior/current medication use (referent: no use) – Outcome: long term opioid use (12 months)**

| Quality assessment                                        |                       |                           |                          |                         |                        |                      | Adjusted effect        | Quality |
|-----------------------------------------------------------|-----------------------|---------------------------|--------------------------|-------------------------|------------------------|----------------------|------------------------|---------|
| No of studies                                             | Design                | Risk of bias              | Inconsistency            | Indirectness            | Imprecision            | Other considerations | Relative (95% CI)      |         |
| <b>Long-term opioid use (12 months) – Benzodiazepines</b> |                       |                           |                          |                         |                        |                      |                        |         |
| 1                                                         | Observational studies | Very serious <sup>1</sup> | No serious inconsistency | No serious indirectness | No serious imprecision | None                 | OR 1.48 (1.41 to 1.55) | LOW     |
| <b>Long-term opioid use (12 months) – NSAIDs</b>          |                       |                           |                          |                         |                        |                      |                        |         |
| 1                                                         | Observational studies | Very serious <sup>1</sup> | No serious inconsistency | No serious indirectness | No serious imprecision | None                 | OR 1.22 (1.17 to 1.27) | LOW     |
| <b>Long-term opioid use (12 months) – Pregabalin</b>      |                       |                           |                          |                         |                        |                      |                        |         |
| 1                                                         | Observational studies | Very serious <sup>1</sup> | No serious inconsistency | No serious indirectness | No serious imprecision | None                 | OR 1.96 (1.83 to 2.1)  | LOW     |

<sup>1</sup>Downgraded by 1 increment if the majority of the evidence was at high risk of bias and by 2 increments if the majority of the evidence was at very high risk of bias

**Table 55: Risk factor: Smoking (referent: no smoking) – Outcome: prescription overuse / long term opioid use**

| Quality assessment                      |                       |                           |                          |                                   |                        |                      | Adjusted effect        | Quality  |
|-----------------------------------------|-----------------------|---------------------------|--------------------------|-----------------------------------|------------------------|----------------------|------------------------|----------|
| No of studies                           | Design                | Risk of bias              | Inconsistency            | Indirectness                      | Imprecision            | Other considerations | Relative (95% CI)      |          |
| <b>Prescription overuse</b>             |                       |                           |                          |                                   |                        |                      |                        |          |
| 1                                       | Observational studies | Very serious <sup>1</sup> | No serious inconsistency | Serious indirectness <sup>2</sup> | No serious imprecision | None                 | OR 2.74 (1.14 to 6.63) | VERY LOW |
| <b>Long-term opioid use (12 months)</b> |                       |                           |                          |                                   |                        |                      |                        |          |
| 1                                       | Observational studies | Very serious <sup>1</sup> | No serious inconsistency | No serious indirectness           | Serious <sup>3</sup>   | None                 | OR 0.95 (0.6 to 1.5)   | VERY LOW |

<sup>1</sup>Downgraded by 1 increment if the majority of the evidence was at high risk of bias and by 2 increments if the majority of the evidence was at very high risk of bias

<sup>2</sup>Downgraded by 1 increment because 20% of the sample were prescribed non-opioid analgesics<sup>3</sup>Downgraded by 1 increment if the 95% CI crossed the null line

**Table 56: Risk factor: Passive coping (Vanderbilt Pain Management Index, VPMI; definition and referent unclear) – Outcome: Prescription overuse**

| Quality assessment          |                       |                           |                          |                      |                      |                      | Adjusted effect        | Quality  |
|-----------------------------|-----------------------|---------------------------|--------------------------|----------------------|----------------------|----------------------|------------------------|----------|
| No of studies               | Design                | Risk of bias              | Inconsistency            | Indirectness         | Imprecision          | Other considerations | Relative (95% CI)      |          |
| <b>Prescription overuse</b> |                       |                           |                          |                      |                      |                      |                        |          |
| 1                           | Observational studies | Very serious <sup>1</sup> | No serious inconsistency | Serious <sup>2</sup> | Serious <sup>3</sup> | None                 | OR 0.99 (0.91 to 1.07) | VERY LOW |

<sup>1</sup>Downgraded by 1 increment if the majority of the evidence was at high risk of bias and by 2 increments if the majority of the evidence was at very high risk of bias

<sup>2</sup>Downgraded by 1 increment because 20% of the sample were prescribed non-opioid analgesics

<sup>3</sup>Downgraded by 1 increment if the 95% CI crossed the null line

**Table 57: Risk factor: Previous back injury (referent: no previous injury) – Outcome: Long term opioid use**

| Quality assessment                      |                       |                           |                          |                         |                        |                      | Adjusted effect      | Quality |
|-----------------------------------------|-----------------------|---------------------------|--------------------------|-------------------------|------------------------|----------------------|----------------------|---------|
| No of studies                           | Design                | Risk of bias              | Inconsistency            | Indirectness            | Imprecision            | Other considerations | Relative (95% CI)    |         |
| <b>Long-term opioid use (12 months)</b> |                       |                           |                          |                         |                        |                      |                      |         |
| 1                                       | Observational studies | Very serious <sup>1</sup> | No serious inconsistency | No serious indirectness | No serious imprecision | None                 | OR 2.4 (1.5 to 3.84) | LOW     |

<sup>1</sup>Downgraded by 1 increment if the majority of the evidence was at high risk of bias and by 2 increments if the majority of the evidence was at very high risk of bias



## 1.2.2 Benzodiazepines

**Table 58: Risk factor: Race (referent: white) – Outcome: Benzodiazepine dependence**

| Quality assessment                        |                       |                           |                          |                         |                        |                      | Adjusted effect        | Quality |
|-------------------------------------------|-----------------------|---------------------------|--------------------------|-------------------------|------------------------|----------------------|------------------------|---------|
| No of studies                             | Design                | Risk of bias              | Inconsistency            | Indirectness            | Imprecision            | Other considerations | Relative (95% CI)      |         |
| <b>Benzodiazepine dependence – Black</b>  |                       |                           |                          |                         |                        |                      |                        |         |
| 1                                         | Observational studies | Very serious <sup>1</sup> | No serious inconsistency | No serious indirectness | No serious imprecision | None                 | HR 0.18 (0.15 to 0.21) | LOW     |
| <b>Benzodiazepine dependence – Latino</b> |                       |                           |                          |                         |                        |                      |                        |         |
| 1                                         | Observational studies | Very serious <sup>1</sup> | No serious inconsistency | No serious indirectness | No serious imprecision | None                 | HR 0.2 (0.17 to 0.23)  | LOW     |
| <b>Benzodiazepine dependence – Asian</b>  |                       |                           |                          |                         |                        |                      |                        |         |
| 1                                         | Observational studies | Very serious <sup>1</sup> | No serious inconsistency | No serious indirectness | No serious imprecision | None                 | HR 0.43 (0.25 to 0.74) | LOW     |

<sup>1</sup>Downgraded by 1 increment if the majority of the evidence was at high risk of bias and by 2 increments if the majority of the evidence was at very high risk of bias

**Table 59: Risk factor: Ethnicity (referent: White or other) – Outcome: Chronic sedative use >275 days**

| Quality assessment                                     |                       |                           |                          |                         |                        |                      | Adjusted effect        | Quality |
|--------------------------------------------------------|-----------------------|---------------------------|--------------------------|-------------------------|------------------------|----------------------|------------------------|---------|
| No of studies                                          | Design                | Risk of bias              | Inconsistency            | Indirectness            | Imprecision            | Other considerations | Relative (95% CI)      |         |
| <b>Chronic sedative use &gt;275 days – Chinese</b>     |                       |                           |                          |                         |                        |                      |                        |         |
| 1                                                      | Observational studies | Very serious <sup>1</sup> | No serious inconsistency | No serious indirectness | No serious imprecision | None                 | OR 0.81 (0.76 to 0.86) | LOW     |
| <b>Chronic sedative use &gt;275 days - South Asian</b> |                       |                           |                          |                         |                        |                      |                        |         |
| 1                                                      | Observational studies | Very serious <sup>1</sup> | No serious inconsistency | No serious indirectness | No serious imprecision | None                 | OR 0.69 (0.63 to 0.76) | LOW     |

<sup>1</sup>Downgraded by 1 increment if the majority of the evidence was at high risk of bias and by 2 increments if the majority of the evidence was at very high risk of bias

**Table 60: Risk factor: Sex (referent female) – Outcome: Benzodiazepine dependence**

| Quality assessment                      |                       |                           |                          |                         |                      |                      | Adjusted effect        | Quality  |
|-----------------------------------------|-----------------------|---------------------------|--------------------------|-------------------------|----------------------|----------------------|------------------------|----------|
| No of studies                           | Design                | Risk of bias              | Inconsistency            | Indirectness            | Imprecision          | Other considerations | Relative (95% CI)      |          |
| <b>Benzodiazepine dependence – Male</b> |                       |                           |                          |                         |                      |                      |                        |          |
| 1                                       | Observational studies | Very serious <sup>1</sup> | No serious inconsistency | No serious indirectness | Serious <sup>2</sup> | None                 | HR 1.33 (0.55 to 3.21) | VERY LOW |

<sup>1</sup>Downgraded by 1 increment if the majority of the evidence was at high risk of bias and by 2 increments if the majority of the evidence was at very high risk of bias

<sup>2</sup>Downgraded by 1 increment if the 95% CI crossed the null line

**Table 61: Risk factor: Sex (referent female) – Outcome: Long term use**

| Quality assessment   |                       |                           |                          |                         |                        |                      | Adjusted effect     | Quality |
|----------------------|-----------------------|---------------------------|--------------------------|-------------------------|------------------------|----------------------|---------------------|---------|
| No of studies        | Design                | Risk of bias              | Inconsistency            | Indirectness            | Imprecision            | Other considerations | Relative (95% CI)   |         |
| <b>Long term use</b> |                       |                           |                          |                         |                        |                      |                     |         |
| 1                    | Observational studies | Very serious <sup>1</sup> | No serious inconsistency | No serious indirectness | No serious imprecision | None                 | OR 1.41 (1.12-1.78) | LOW     |

<sup>1</sup>Downgraded by 1 increment if the majority of the evidence was at high risk of bias and by 2 increments if the majority of the evidence was at very high risk of bias

**Table 62: Risk factor: Sex (referent male) – Outcome dependence, defined as per figure**

| Quality assessment            |                       |                           |                          |                         |                        |                                                                   | Absolute effect    | Quality  |
|-------------------------------|-----------------------|---------------------------|--------------------------|-------------------------|------------------------|-------------------------------------------------------------------|--------------------|----------|
| No of studies                 | Design                | Risk of bias              | Inconsistency            | Indirectness            | Imprecision            | Other considerations                                              | Relative (95% CI)  |          |
| <b>Dependence (DSM-IV-TR)</b> |                       |                           |                          |                         |                        |                                                                   |                    |          |
| 1                             | Observational studies | Very serious <sup>1</sup> | No serious inconsistency | No serious indirectness | No serious imprecision | None                                                              | OR 3.00 (1.4-6.43) | LOW      |
| <b>Self-rated addiction</b>   |                       |                           |                          |                         |                        |                                                                   |                    |          |
| 1                             | Observational studies | Very serious <sup>1</sup> | No serious inconsistency | No serious indirectness | No serious imprecision | Only reported as non-significant – no data available <sup>2</sup> | NS                 | VERY LOW |

<sup>1</sup>Downgraded by 1 increment if the majority of the evidence was at high risk of bias and by 2 increments if the majority of the evidence was at very high risk of bias

<sup>2</sup>Downgraded by 1 increment

NS = not significant

**Table 63: Risk factor: Age (referent: 18-24 years) – Outcome: Benzodiazepine dependence**

| Quality assessment                             |                       |                           |                          |                         |                      |                      | Adjusted effect        | Quality  |
|------------------------------------------------|-----------------------|---------------------------|--------------------------|-------------------------|----------------------|----------------------|------------------------|----------|
| No of studies                                  | Design                | Risk of bias              | Inconsistency            | Indirectness            | Imprecision          | Other considerations | Relative (95% CI)      |          |
| <b>Benzodiazepine dependence - 25-34 years</b> |                       |                           |                          |                         |                      |                      |                        |          |
| 1                                              | Observational studies | Very serious <sup>1</sup> | No serious inconsistency | No serious indirectness | Serious <sup>2</sup> | None                 | HR 1.23 (0.35 to 4.31) | VERY LOW |
| <b>Benzodiazepine dependence - 35-44 years</b> |                       |                           |                          |                         |                      |                      |                        |          |
| 1                                              | Observational studies | Very serious <sup>1</sup> | No serious inconsistency | No serious indirectness | Serious <sup>2</sup> | None                 | HR 0.66 (0.33 to 1.31) | VERY LOW |
| <b>Benzodiazepine dependence - 45-54 years</b> |                       |                           |                          |                         |                      |                      |                        |          |
| 1                                              | Observational studies | Very serious <sup>1</sup> | No serious inconsistency | No serious indirectness | Serious <sup>2</sup> | None                 | HR 0.87 (0.37 to 2.06) | VERY LOW |
| <b>Benzodiazepine dependence - 55-64 years</b> |                       |                           |                          |                         |                      |                      |                        |          |
| 1                                              | Observational studies | Very serious <sup>1</sup> | No serious inconsistency | No serious indirectness | Serious <sup>2</sup> | None                 | HR 1.08 (0.37 to 3.11) | VERY LOW |
| <b>Benzodiazepine dependence - 65+ years</b>   |                       |                           |                          |                         |                      |                      |                        |          |
| 1                                              | Observational studies | Very serious <sup>1</sup> | No serious inconsistency | No serious indirectness | Serious <sup>2</sup> | None                 | HR 1.47 (0.34 to 6.27) | VERY LOW |

<sup>1</sup>Downgraded by 1 increment if the majority of the evidence was at high risk of bias and by 2 increments if the majority of the evidence was at very high risk of bias

<sup>2</sup>Downgraded by 1 increment if the 95% CI crossed the null line

**Table 64: Risk factor: Age, years (referent: below 30) – Outcome: Long term use**

| Quality assessment                 |                       |                           |                          |                         |                        |                      | Adjusted effect        | Quality  |
|------------------------------------|-----------------------|---------------------------|--------------------------|-------------------------|------------------------|----------------------|------------------------|----------|
| No of studies                      | Design                | Risk of bias              | Inconsistency            | Indirectness            | Imprecision            | Other considerations | Relative (95% CI)      |          |
| <b>Long term use - 30-39</b>       |                       |                           |                          |                         |                        |                      |                        |          |
| 1                                  | Observational studies | Very serious <sup>1</sup> | No serious inconsistency | No serious indirectness | Serious <sup>2</sup>   | None                 | OR 1.24 (0.77 to 2)    | VERY LOW |
| <b>Long term use - 40-64</b>       |                       |                           |                          |                         |                        |                      |                        |          |
| 1                                  | Observational studies | Very serious <sup>1</sup> | No serious inconsistency | No serious indirectness | No serious imprecision | None                 | OR 2.89 (1.95 to 4.28) | LOW      |
| <b>Long term use - 65 or above</b> |                       |                           |                          |                         |                        |                      |                        |          |
| 1                                  | Observational studies | Very serious <sup>1</sup> | No serious inconsistency | No serious indirectness | No serious imprecision | None                 | OR 6.36 (4.18 to 9.68) | LOW      |

<sup>1</sup>Downgraded by 1 increment if the majority of the evidence was at high risk of bias and by 2 increments if the majority of the evidence was at very high risk of bias

<sup>2</sup>Downgraded by 1 increment if the 95% CI crossed the null line

**Table 65: Risk factor: Age, years (referent: 50-54) – Outcome: Chronic sedative use >275 days**

| Quality assessment                               |                       |                           |                          |                         |                        |                      | Adjusted effect        | Quality |
|--------------------------------------------------|-----------------------|---------------------------|--------------------------|-------------------------|------------------------|----------------------|------------------------|---------|
| No of studies                                    | Design                | Risk of bias              | Inconsistency            | Indirectness            | Imprecision            | Other considerations | Relative (95% CI)      |         |
| <b>Chronic sedative use &gt;275 days - 55-59</b> |                       |                           |                          |                         |                        |                      |                        |         |
| 1                                                | Observational studies | Very serious <sup>1</sup> | No serious inconsistency | No serious indirectness | No serious imprecision | None                 | OR 1.03 (0.99 to 1.07) | LOW     |
| <b>Chronic sedative use &gt;275 days - 60-64</b> |                       |                           |                          |                         |                        |                      |                        |         |
| 1                                                | Observational studies | Very serious <sup>1</sup> | No serious inconsistency | No serious indirectness | No serious imprecision | None                 | OR 1.16 (1.11 to 1.21) | LOW     |
| <b>Chronic sedative use &gt;275 days - 65-69</b> |                       |                           |                          |                         |                        |                      |                        |         |
| 1                                                | Observational studies | Very serious <sup>1</sup> | No serious inconsistency | No serious indirectness | No serious imprecision | None                 | OR 1.29 (1.24 to 1.34) | LOW     |

<sup>1</sup>Downgraded by 1 increment if the majority of the evidence was at high risk of bias and by 2 increments if the majority of the evidence was at very high risk of bias

**Table 66: Risk factor: Age, ≥ 75 years (referent: 65-74) – Outcome: dependence/addiction**

| Quality assessment                                   |                       |                           |                          |                         |                        |                                                                   | Adjusted effect      | Quality  |
|------------------------------------------------------|-----------------------|---------------------------|--------------------------|-------------------------|------------------------|-------------------------------------------------------------------|----------------------|----------|
| No of studies                                        | Design                | Risk of bias              | Inconsistency            | Indirectness            | Imprecision            | Other considerations                                              | Relative (95% CI)    |          |
| <b>Dependence/Addiction - Dependence (DSM-IV-TR)</b> |                       |                           |                          |                         |                        |                                                                   |                      |          |
| 1                                                    | Observational studies | Very serious <sup>1</sup> | No serious inconsistency | No serious indirectness | No serious imprecision | Only reported as non-significant – no data available <sup>2</sup> | NS                   | VERY LOW |
| <b>Dependence/Addiction - Self-rated addiction</b>   |                       |                           |                          |                         |                        |                                                                   |                      |          |
| 1                                                    | Observational studies | Very serious <sup>1</sup> | No serious inconsistency | No serious indirectness | No serious imprecision | None                                                              | OR 1.7 (1.1 to 2.63) | LOW      |

<sup>1</sup>Downgraded by 1 increment if the majority of the evidence was at high risk of bias and by 2 increments if the majority of the evidence was at very high risk of bias

<sup>2</sup>Downgraded by 1 increment - Only reported as non-significant

NS = not significant

**Table 67: Risk factor: Relationship status (referent: marriage-like relationship) – Outcome: Chronic sedative use >275 days**

| Quality assessment                                |                       |                           |                          |                         |                        |                      | Adjusted effect     | Quality |
|---------------------------------------------------|-----------------------|---------------------------|--------------------------|-------------------------|------------------------|----------------------|---------------------|---------|
| No of studies                                     | Design                | Risk of bias              | Inconsistency            | Indirectness            | Imprecision            | Other considerations | Relative (95% CI)   |         |
| <b>Chronic sedative use &gt;275 days - Single</b> |                       |                           |                          |                         |                        |                      |                     |         |
| 1                                                 | Observational studies | Very serious <sup>1</sup> | No serious inconsistency | No serious indirectness | No serious imprecision | None                 | OR 1.04 (1 to 1.08) | LOW     |

<sup>1</sup>Downgraded by 1 increment if the majority of the evidence was at high risk of bias and by 2 increments if the majority of the evidence was at very high risk of bias

**Table 68: Risk factor: Neighbourhood urbanisation (referent: urban) – Outcome: Chronic sedative use >275 days**

| Quality assessment                                             |                       |                           |                          |                         |                        |                      | Adjusted effect        | Quality |
|----------------------------------------------------------------|-----------------------|---------------------------|--------------------------|-------------------------|------------------------|----------------------|------------------------|---------|
| No of studies                                                  | Design                | Risk of bias              | Inconsistency            | Indirectness            | Imprecision            | Other considerations | Relative (95% CI)      |         |
| <b>Chronic sedative use &gt;275 days - Mixed urban / rural</b> |                       |                           |                          |                         |                        |                      |                        |         |
| 1                                                              | Observational studies | Very serious <sup>1</sup> | No serious inconsistency | No serious indirectness | No serious imprecision | None                 | OR 1.11 (1.08 to 1.14) | LOW     |
| <b>Chronic sedative use &gt;275 days - Rural</b>               |                       |                           |                          |                         |                        |                      |                        |         |
| 1                                                              | Observational studies | Very serious <sup>1</sup> | No serious inconsistency | No serious indirectness | No serious imprecision | None                 | OR 1.06 (1 to 1.12)    | LOW     |

<sup>1</sup>Downgraded by 1 increment if the majority of the evidence was at high risk of bias and by 2 increments if the majority of the evidence was at very high risk of bias

**Table 69: Risk factor: Population income quintile (referent: fifth quintile) - Outcome: Chronic sedative use >275 days**

| Quality assessment                                |                       |                           |                          |                         |                        |                      | Adjusted effect        | Quality |
|---------------------------------------------------|-----------------------|---------------------------|--------------------------|-------------------------|------------------------|----------------------|------------------------|---------|
| No of studies                                     | Design                | Risk of bias              | Inconsistency            | Indirectness            | Imprecision            | Other considerations | Relative (95% CI)      |         |
| <b>Chronic sedative use &gt;275 days - Lowest</b> |                       |                           |                          |                         |                        |                      |                        |         |
| 1                                                 | Observational studies | Very serious <sup>1</sup> | No serious inconsistency | No serious indirectness | No serious imprecision | None                 | OR 1.29 (1.23 to 1.35) | LOW     |
| <b>Chronic sedative use &gt;275 days - Second</b> |                       |                           |                          |                         |                        |                      |                        |         |
| 1                                                 | Observational studies | Very serious <sup>1</sup> | No serious inconsistency | No serious indirectness | No serious imprecision | None                 | OR 1.23 (1.18 to 1.28) | LOW     |
| <b>Chronic sedative use &gt;275 days - Third</b>  |                       |                           |                          |                         |                        |                      |                        |         |
| 1                                                 | Observational studies | Very serious <sup>1</sup> | No serious inconsistency | No serious indirectness | No serious imprecision | None                 | OR 1.16 (1.11 to 1.21) | LOW     |
| <b>Chronic sedative use &gt;275 days – Fourth</b> |                       |                           |                          |                         |                        |                      |                        |         |



|   |                       |                           |                          |                         |                        |      |                        |     |
|---|-----------------------|---------------------------|--------------------------|-------------------------|------------------------|------|------------------------|-----|
| 1 | Observational studies | Very serious <sup>1</sup> | No serious inconsistency | No serious indirectness | No serious imprecision | None | OR 1.08 (1.04 to 1.12) | LOW |
|---|-----------------------|---------------------------|--------------------------|-------------------------|------------------------|------|------------------------|-----|

<sup>1</sup>Downgraded by 1 increment if the majority of the evidence was at high risk of bias and by 2 increments if the majority of the evidence was at very high risk of bias

**Table 70: Risk factor: Mental health diagnosis (vs no diagnosis) – Outcome long term use**

| Quality assessment   |                       |                           |                          |                         |                        |                      | Adjusted effect        | Quality |
|----------------------|-----------------------|---------------------------|--------------------------|-------------------------|------------------------|----------------------|------------------------|---------|
| No of studies        | Design                | Risk of bias              | Inconsistency            | Indirectness            | Imprecision            | Other considerations | Relative (95% CI)      |         |
| <b>Long term use</b> |                       |                           |                          |                         |                        |                      |                        |         |
| 1                    | Observational studies | Very serious <sup>1</sup> | No serious inconsistency | No serious indirectness | No serious imprecision | None                 | OR 1.87 (1.41 to 2.48) | LOW     |

<sup>1</sup>Downgraded by 1 increment if the majority of the evidence was at high risk of bias and by 2 increments if the majority of the evidence was at very high risk of bias

**Table 71: Risk factor: Mental health disorder diagnosis (vs no diagnosis) – Outcome: Benzodiazepine dependence**

| Quality assessment                            |                       |                           |                          |                         |                        |                      | Adjusted effect        | Quality  |
|-----------------------------------------------|-----------------------|---------------------------|--------------------------|-------------------------|------------------------|----------------------|------------------------|----------|
| No of studies                                 | Design                | Risk of bias              | Inconsistency            | Indirectness            | Imprecision            | Other considerations | Relative (95% CI)      |          |
| <b>Benzodiazepine dependence – Depression</b> |                       |                           |                          |                         |                        |                      |                        |          |
| 1                                             | Observational studies | Very serious <sup>1</sup> | No serious inconsistency | No serious indirectness | No serious imprecision | None                 | HR 1.43 (0.99 to 2.08) | LOW      |
| <b>Benzodiazepine dependence – Anxiety</b>    |                       |                           |                          |                         |                        |                      |                        |          |
| 1                                             | Observational studies | Very serious <sup>1</sup> | No serious inconsistency | No serious indirectness | No serious imprecision | None                 | HR 1.6 (1.02 to 2.51)  | LOW      |
| <b>Benzodiazepine dependence – Bipolar</b>    |                       |                           |                          |                         |                        |                      |                        |          |
| 1                                             | Observational studies | Very serious <sup>1</sup> | No serious inconsistency | No serious indirectness | Serious <sup>2</sup>   | None                 | HR 1.02 (0.69 to 1.51) | VERY LOW |
| <b>Benzodiazepine dependence – PTSD</b>       |                       |                           |                          |                         |                        |                      |                        |          |

|                                                         |                       |                           |                          |                         |                        |      |                        |          |
|---------------------------------------------------------|-----------------------|---------------------------|--------------------------|-------------------------|------------------------|------|------------------------|----------|
| 1                                                       | Observational studies | Very serious <sup>1</sup> | No serious inconsistency | No serious indirectness | Serious <sup>2</sup>   | None | HR 0.91 (0.65 to 1.27) | VERY LOW |
| <b>Benzodiazepine dependence - Sleeping disturbance</b> |                       |                           |                          |                         |                        |      |                        |          |
| 1                                                       | Observational studies | Very serious <sup>1</sup> | No serious inconsistency | No serious indirectness | No serious imprecision | None | HR 0.69 (0.53 to 0.89) | LOW      |

<sup>1</sup>Downgraded by 1 increment if the majority of the evidence was at high risk of bias and by 2 increments if the majority of the evidence was at very high risk of bias

<sup>2</sup>Downgraded by 1 increment if the 95% CI crossed the null line

**Table 72: Risk factor: Mental health diagnoses; panic disorder or suicidal ideation (vs no diagnosis) – Outcome: dependence or addiction**

| Quality assessment                                |                       |                           |                          |                         |                        |                                                                   | Adjusted effect       | Quality  |
|---------------------------------------------------|-----------------------|---------------------------|--------------------------|-------------------------|------------------------|-------------------------------------------------------------------|-----------------------|----------|
| No of studies                                     | Design                | Risk of bias              | Inconsistency            | Indirectness            | Imprecision            | Other considerations                                              | Relative (95% CI)     |          |
| <b>Panic disorder - Dependence (DSM-IV-TR)</b>    |                       |                           |                          |                         |                        |                                                                   |                       |          |
| 1                                                 | Observational studies | Very serious <sup>1</sup> | No serious inconsistency | No serious indirectness | No serious imprecision | None                                                              | OR 2.6 (1 to 6.76)    | LOW      |
| <b>Panic disorder - Self-rated addiction</b>      |                       |                           |                          |                         |                        |                                                                   |                       |          |
| 1                                                 | Observational studies | Very serious <sup>1</sup> | No serious inconsistency | No serious indirectness | No serious imprecision | None                                                              | OR 2.5 (1.3 to 4.81)  | LOW      |
| <b>Suicidal ideation - Dependence (DSM-IV-TR)</b> |                       |                           |                          |                         |                        |                                                                   |                       |          |
| 1                                                 | Observational studies | Very serious <sup>1</sup> | No serious inconsistency | No serious indirectness | No serious imprecision | None                                                              | OR 4.5 (1.4 to 14.46) | LOW      |
| <b>Suicidal ideation - Self-rated addiction</b>   |                       |                           |                          |                         |                        |                                                                   |                       |          |
| 1                                                 | Observational studies | Very serious <sup>1</sup> | No serious inconsistency | No serious indirectness | No serious imprecision | Only reported as non-significant – no data available <sup>2</sup> | NS                    | VERY LOW |

<sup>1</sup>Downgraded by 1 increment if the majority of the evidence was at high risk of bias and by 2 increments if the majority of the evidence was at very high risk of bias

<sup>2</sup>Downgraded by 1 increment due to insufficient reporting of data

NS = non-significant

**Table 73: Risk factor: Diagnoses (referent: not stated) – Outcome: Chronic sedative use >275 days**

| Quality assessment                                        |                       |                           |                          |                         |                        |                      | Adjusted effect        | Quality |
|-----------------------------------------------------------|-----------------------|---------------------------|--------------------------|-------------------------|------------------------|----------------------|------------------------|---------|
| No of studies                                             | Design                | Risk of bias              | Inconsistency            | Indirectness            | Imprecision            | Other considerations | Relative (95% CI)      |         |
| <b>Chronic sedative use &gt;275 days - Sleep problems</b> |                       |                           |                          |                         |                        |                      |                        |         |
| 1                                                         | Observational studies | Very serious <sup>1</sup> | No serious inconsistency | No serious indirectness | No serious imprecision | None                 | OR 1.77 (1.68 to 1.86) | LOW     |

| Chronic sedative use >275 days - Neurologic disorders, other |                       |                           |                          |                         |                        |      |                        |          |
|--------------------------------------------------------------|-----------------------|---------------------------|--------------------------|-------------------------|------------------------|------|------------------------|----------|
| 1                                                            | Observational studies | Very serious <sup>1</sup> | No serious inconsistency | No serious indirectness | No serious imprecision | None | OR 1.15 (1.05 to 1.26) | LOW      |
| Chronic sedative use >275 days - Dementia and delirium       |                       |                           |                          |                         |                        |      |                        |          |
| 1                                                            | Observational studies | Very serious <sup>1</sup> | No serious inconsistency | No serious indirectness | No serious imprecision | None | OR 1.11 (1.03 to 1.2)  | LOW      |
| Chronic sedative use >275 days - Anxiety, neurosis           |                       |                           |                          |                         |                        |      |                        |          |
| 1                                                            | Observational studies | Very serious <sup>1</sup> | No serious inconsistency | No serious indirectness | No serious imprecision | None | OR 1.09 (1.06 to 1.12) | LOW      |
| Chronic sedative use >275 days – Depression                  |                       |                           |                          |                         |                        |      |                        |          |
| 1                                                            | Observational studies | Very serious <sup>1</sup> | No serious inconsistency | No serious indirectness | No serious imprecision | None | OR 1.51 (1.45 to 1.57) | LOW      |
| Chronic sedative use >275 days - Psychological signs         |                       |                           |                          |                         |                        |      |                        |          |
| 1                                                            | Observational studies | Very serious <sup>1</sup> | No serious inconsistency | No serious indirectness | Serious                | None | OR 1.1 (0.88 to 1.38)  | VERY LOW |

<sup>1</sup>Downgraded by 1 increment if the majority of the evidence was at high risk of bias and by 2 increments if the majority of the evidence was at very high risk of bias

**Table 74: Risk factor: Cognitive functioning (mild impairment vs intact) – Outcome: dependence or addiction**

| Quality assessment                                 |                       |                           |                          |                         |                        |                                                                   | Absolute effect      | Quality  |
|----------------------------------------------------|-----------------------|---------------------------|--------------------------|-------------------------|------------------------|-------------------------------------------------------------------|----------------------|----------|
| No of studies                                      | Design                | Risk of bias              | Inconsistency            | Indirectness            | Imprecision            | Other considerations                                              | Relative (95% CI)    |          |
| Mild impairment vs intact - Dependence (DSM-IV-TR) |                       |                           |                          |                         |                        |                                                                   |                      |          |
| 1                                                  | Observational studies | Very serious <sup>1</sup> | No serious inconsistency | No serious indirectness | No serious imprecision | None                                                              | OR 2.5 (1.1 to 5.68) | LOW      |
| Mild impairment vs intact - Self-rated addiction   |                       |                           |                          |                         |                        |                                                                   |                      |          |
| 1                                                  | Observational studies | Very serious <sup>1</sup> | No serious inconsistency | No serious indirectness | No serious imprecision | Only reported as non-significant – no data available <sup>2</sup> | NS                   | VERY LOW |

<sup>1</sup>Downgraded by 1 increment if the majority of the evidence was at high risk of bias and by 2 increments if the majority of the evidence was at very high risk of bias

<sup>2</sup>Downgraded by 1 increment due to insufficient reporting of data

NS = not significant

**Table 75: Risk factor: Number of physical diseases (referent: 1 disease) – Outcome: long term use**

| Quality assessment               |                       |                           |                          |                         |                        |                      | Adjusted effect        | Quality  |
|----------------------------------|-----------------------|---------------------------|--------------------------|-------------------------|------------------------|----------------------|------------------------|----------|
| No of studies                    | Design                | Risk of bias              | Inconsistency            | Indirectness            | Imprecision            | Other considerations | Relative (95% CI)      |          |
| <b>Long term use - 2</b>         |                       |                           |                          |                         |                        |                      |                        |          |
| 1                                | Observational studies | Very serious <sup>1</sup> | No serious inconsistency | No serious indirectness | Serious <sup>2</sup>   | None                 | OR 0.99 (0.7 to 1.4)   | VERY LOW |
| <b>Long term use - 3 or more</b> |                       |                           |                          |                         |                        |                      |                        |          |
| 1                                | Observational studies | Very serious <sup>1</sup> | No serious inconsistency | No serious indirectness | No serious imprecision | None                 | OR 1.56 (1.02 to 2.39) | LOW      |

<sup>1</sup>Downgraded by 1 increment if the majority of the evidence was at high risk of bias and by 2 increments if the majority of the evidence was at very high risk of bias

<sup>2</sup>Downgraded by 1 increment if the 95% CI crossed the null line

**Table 76: Risk factor: Count of major aggregated diagnostic groups (ADGs) as a measure of overall health status (referent: 0 ADGs) – Outcome: Chronic sedative use >275 days**

| Quality assessment                                  |                       |                           |                          |                         |                        |                      | Adjusted effect        | Quality |
|-----------------------------------------------------|-----------------------|---------------------------|--------------------------|-------------------------|------------------------|----------------------|------------------------|---------|
| No of studies                                       | Design                | Risk of bias              | Inconsistency            | Indirectness            | Imprecision            | Other considerations | Relative (95% CI)      |         |
| <b>Chronic sedative use &gt;275 days - 1-2 ADGs</b> |                       |                           |                          |                         |                        |                      |                        |         |
| 1                                                   | Observational studies | Very serious <sup>1</sup> | No serious inconsistency | No serious indirectness | No serious imprecision | None                 | OR 1.19 (1.16 to 1.22) | LOW     |
| <b>Chronic sedative use &gt;275 days - 3+ ADGs</b>  |                       |                           |                          |                         |                        |                      |                        |         |
| 1                                                   | Observational studies | Very serious <sup>1</sup> | No serious inconsistency | No serious indirectness | No serious imprecision | None                 | OR 1.34 (1.28 to 1.4)  | LOW     |

<sup>1</sup>Downgraded by 1 increment if the majority of the evidence was at high risk of bias and by 2 increments if the majority of the evidence was at very high risk of bias

**Table 77: Risk factor: Count of minor ADGs (referent: 0-1 minor ADGs) – Outcome: Chronic sedative use >275 days**

| Quality assessment                                        |                       |                           |                          |                         |                        |                      | Adjusted effect        | Quality  |
|-----------------------------------------------------------|-----------------------|---------------------------|--------------------------|-------------------------|------------------------|----------------------|------------------------|----------|
| No of studies                                             | Design                | Risk of bias              | Inconsistency            | Indirectness            | Imprecision            | Other considerations | Relative (95% CI)      |          |
| <b>Chronic sedative use &gt;275 days - 2-3 minor ADGs</b> |                       |                           |                          |                         |                        |                      |                        |          |
| 1                                                         | Observational studies | Very serious <sup>1</sup> | No serious inconsistency | No serious indirectness | Serious <sup>2</sup>   | None                 | OR 0.99 (0.93 to 1.05) | VERY LOW |
| <b>Chronic sedative use &gt;275 days - 4-5 minor ADGs</b> |                       |                           |                          |                         |                        |                      |                        |          |
| 1                                                         | Observational studies | Very serious <sup>1</sup> | No serious inconsistency | No serious indirectness | Serious <sup>2</sup>   | None                 | OR 1.04 (0.98 to 1.1)  | VERY LOW |
| <b>Chronic sedative use &gt;275 days - 6+minor ADGs</b>   |                       |                           |                          |                         |                        |                      |                        |          |
| 1                                                         | Observational studies | Very serious <sup>1</sup> | No serious inconsistency | No serious indirectness | No serious imprecision | None                 | OR 1.08 (1.01 to 1.15) | LOW      |

<sup>1</sup>Downgraded by 1 increment if the majority of the evidence was at high risk of bias and by 2 increments if the majority of the evidence was at very high risk of bias

<sup>2</sup>Downgraded by 1 increment if the 95% CI crossed the null line

**Table 78: Risk factor: Number of benzodiazepine agents (referent: 1) – Outcome: Long term use**

| Quality assessment               |                       |                           |                          |                         |                        |                      | Adjusted effect        | Quality |
|----------------------------------|-----------------------|---------------------------|--------------------------|-------------------------|------------------------|----------------------|------------------------|---------|
| No of studies                    | Design                | Risk of bias              | Inconsistency            | Indirectness            | Imprecision            | Other considerations | Relative (95% CI)      |         |
| <b>Long term use – 2</b>         |                       |                           |                          |                         |                        |                      |                        |         |
| 1                                | Observational studies | Very serious <sup>1</sup> | No serious inconsistency | No serious indirectness | No serious imprecision | None                 | OR 2.32 (1.59 to 3.39) | LOW     |
| <b>Long term use - 3 or more</b> |                       |                           |                          |                         |                        |                      |                        |         |
| 1                                | Observational studies | Very serious <sup>1</sup> | No serious inconsistency | No serious indirectness | No serious imprecision | None                 | OR 4.55 (2.85 to 7.26) | LOW     |

<sup>1</sup>Downgraded by 1 increment if the majority of the evidence was at high risk of bias and by 2 increments if the majority of the evidence was at very high risk of bias

**Table 79: Risk factor: Benzodiazepine half-life (referent: long acting) – Outcome: Long term use**

| Quality assessment                  |                       |                           |                          |                         |                        |                      | Adjusted effect        | Quality |
|-------------------------------------|-----------------------|---------------------------|--------------------------|-------------------------|------------------------|----------------------|------------------------|---------|
| No of studies                       | Design                | Risk of bias              | Inconsistency            | Indirectness            | Imprecision            | Other considerations | Relative (95% CI)      |         |
| <b>Long term use - Short acting</b> |                       |                           |                          |                         |                        |                      |                        |         |
| 1                                   | Observational studies | Very serious <sup>1</sup> | No serious inconsistency | No serious indirectness | No serious imprecision | None                 | OR 3.02 (1.64 to 5.56) | LOW     |
| <b>Long term use – Both</b>         |                       |                           |                          |                         |                        |                      |                        |         |
| 1                                   | Observational studies | Very serious <sup>1</sup> | No serious inconsistency | No serious indirectness | No serious imprecision | None                 | OR 3.39 (1.69 to 6.8)  | LOW     |

<sup>1</sup>Downgraded by 1 increment if the majority of the evidence was at high risk of bias and by 2 increments if the majority of the evidence was at very high risk of bias

**Table 80: Risk factor: Indication of benzodiazepine (referent: anxiolytics) – Outcome: Long term use**

| Quality assessment               |                       |                           |                          |                         |                        |                      | Adjusted effect        | Quality |
|----------------------------------|-----------------------|---------------------------|--------------------------|-------------------------|------------------------|----------------------|------------------------|---------|
| No of studies                    | Design                | Risk of bias              | Inconsistency            | Indirectness            | Imprecision            | Other considerations | Relative (95% CI)      |         |
| <b>Long term use – Hypnotics</b> |                       |                           |                          |                         |                        |                      |                        |         |
| 1                                | Observational studies | Very serious <sup>1</sup> | No serious inconsistency | No serious indirectness | No serious imprecision | None                 | OR 1.59 (1.06 to 2.39) | LOW     |
| <b>Long term use – Both</b>      |                       |                           |                          |                         |                        |                      |                        |         |
| 1                                | Observational studies | Very serious <sup>1</sup> | No serious inconsistency | No serious indirectness | No serious imprecision | None                 | OR 2.03 (1.49 to 2.77) | LOW     |

<sup>1</sup>Downgraded by 1 increment if the majority of the evidence was at high risk of bias and by 2 increments if the majority of the evidence was at very high risk of bias

**Table 81: Risk factor: Use of prescribed opioids (vs no opioids) - Outcome: Long term use**

| Quality assessment   |                       |                           |                          |                         |                      |                      | Adjusted effect        | Quality  |
|----------------------|-----------------------|---------------------------|--------------------------|-------------------------|----------------------|----------------------|------------------------|----------|
| No of studies        | Design                | Risk of bias              | Inconsistency            | Indirectness            | Imprecision          | Other considerations | Relative (95% CI)      |          |
| <b>Long term use</b> |                       |                           |                          |                         |                      |                      |                        |          |
| 1                    | Observational studies | Very serious <sup>1</sup> | No serious inconsistency | No serious indirectness | Serious <sup>2</sup> | None                 | OR 0.87 (0.48 to 1.58) | VERY LOW |

<sup>1</sup>Downgraded by 1 increment if the majority of the evidence was at high risk of bias and by 2 increments if the majority of the evidence was at very high risk of bias

<sup>2</sup>Downgraded by 1 increment if the 95% CI crossed the null line

**Table 82: Risk factor: Sedative use (referent: non-user) – Outcome: Chronic sedative use >275 days**

| Quality assessment                                            |                       |                           |                          |                         |                        |                      | Adjusted effect           | Quality  |
|---------------------------------------------------------------|-----------------------|---------------------------|--------------------------|-------------------------|------------------------|----------------------|---------------------------|----------|
| No of studies                                                 | Design                | Risk of bias              | Inconsistency            | Indirectness            | Imprecision            | Other considerations | Relative (95% CI)         |          |
| <b>Chronic sedative use &gt;275 days - Short-term user</b>    |                       |                           |                          |                         |                        |                      |                           |          |
| 1                                                             | Observational studies | Very serious <sup>1</sup> | No serious inconsistency | No serious indirectness | Serious <sup>2</sup>   | None                 | OR 0.98 (0.94 to 1.02)    | VERY LOW |
| <b>Chronic sedative use &gt;275 days - Moderate-term user</b> |                       |                           |                          |                         |                        |                      |                           |          |
| 1                                                             | Observational studies | Very serious <sup>1</sup> | No serious inconsistency | No serious indirectness | No serious imprecision | None                 | OR 2.11 (2.03 to 2.19)    | LOW      |
| <b>Chronic sedative use &gt;275 days - Long-term user</b>     |                       |                           |                          |                         |                        |                      |                           |          |
| 1                                                             | Observational studies | Very serious <sup>1</sup> | No serious inconsistency | No serious indirectness | No serious imprecision | None                 | OR 14.73 (1.24 to 174.99) | LOW      |

<sup>1</sup>Downgraded by 1 increment if the majority of the evidence was at high risk of bias and by 2 increments if the majority of the evidence was at very high risk of bias

<sup>2</sup>Downgraded by 1 increment if the 95% CI crossed the null line



**Table 83: Risk factor: Substance use diagnosis (vs no diagnosis) – Outcome: Benzodiazepine dependence**

| Quality assessment                                                   |                       |                           |                          |                         |                        |                      | Adjusted effect        | Quality  |
|----------------------------------------------------------------------|-----------------------|---------------------------|--------------------------|-------------------------|------------------------|----------------------|------------------------|----------|
| No of studies                                                        | Design                | Risk of bias              | Inconsistency            | Indirectness            | Imprecision            | Other considerations | Relative (95% CI)      |          |
| <b>Benzodiazepine dependence – Alcohol</b>                           |                       |                           |                          |                         |                        |                      |                        |          |
| 1                                                                    | Observational studies | Very serious <sup>1</sup> | No serious inconsistency | No serious indirectness | No serious imprecision | None                 | HR 0.77 (0.6 to 0.99)  | LOW      |
| <b>Benzodiazepine dependence – Marijuana</b>                         |                       |                           |                          |                         |                        |                      |                        |          |
| 1                                                                    | Observational studies | Very serious <sup>1</sup> | No serious inconsistency | No serious indirectness | No serious imprecision | None                 | HR 0.28 (0.2 to 0.38)  | LOW      |
| <b>Benzodiazepine dependence – Cocaine</b>                           |                       |                           |                          |                         |                        |                      |                        |          |
| 1                                                                    | Observational studies | Very serious <sup>1</sup> | No serious inconsistency | No serious indirectness | Serious <sup>2</sup>   | None                 | HR 1.13 (0.79 to 1.61) | VERY LOW |
| <b>Benzodiazepine dependence – Opioid</b>                            |                       |                           |                          |                         |                        |                      |                        |          |
| 1                                                                    | Observational studies | Very serious <sup>1</sup> | No serious inconsistency | No serious indirectness | No serious imprecision | None                 | HR 3.9 (1.18 to 12.89) | LOW      |
| <b>Benzodiazepine dependence – Tobacco</b>                           |                       |                           |                          |                         |                        |                      |                        |          |
| 1                                                                    | Observational studies | Very serious <sup>1</sup> | No serious inconsistency | No serious indirectness | No serious imprecision | None                 | HR 2.08 (1.18 to 3.67) | LOW      |
| <b>Benzodiazepine dependence - Pain medications</b>                  |                       |                           |                          |                         |                        |                      |                        |          |
| 1                                                                    | Observational studies | Very serious <sup>1</sup> | No serious inconsistency | No serious indirectness | No serious imprecision | None                 | HR 0.71 (0.58 to 0.86) | LOW      |
| <b>Benzodiazepine dependence - 2 or more substance use disorders</b> |                       |                           |                          |                         |                        |                      |                        |          |
| 1                                                                    | Observational studies | Very serious <sup>1</sup> | No serious inconsistency | No serious indirectness | No serious imprecision | None                 | HR 2.03 (1.04 to 3.95) | LOW      |

<sup>1</sup>Downgraded by 1 increment if the majority of the evidence was at high risk of bias and by 2 increments if the majority of the evidence was at very high risk of bias<sup>2</sup>Downgraded by 1 increment if the 95% CI crossed the null line

**Table 84: Risk factor: Hospital level (referent: clinics only) - Outcome: Long term use**

| Quality assessment                                    |                       |                           |                          |                         |                        |                      | Adjusted effect        | Quality |
|-------------------------------------------------------|-----------------------|---------------------------|--------------------------|-------------------------|------------------------|----------------------|------------------------|---------|
| No of studies                                         | Design                | Risk of bias              | Inconsistency            | Indirectness            | Imprecision            | Other considerations | Relative (95% CI)      |         |
| <b>Long term use - Local community hospitals only</b> |                       |                           |                          |                         |                        |                      |                        |         |
| 1                                                     | Observational studies | Very serious <sup>1</sup> | No serious inconsistency | No serious indirectness | No serious imprecision | None                 | OR 2.78 (1.62 to 4.77) | LOW     |
| <b>Long term use - Medical centres only</b>           |                       |                           |                          |                         |                        |                      |                        |         |
| 1                                                     | Observational studies | Very serious <sup>1</sup> | No serious inconsistency | No serious indirectness | No serious imprecision | None                 | OR 5.87 (3.57 to 9.65) | LOW     |
| <b>Long term use - Metropolitan hospitals only</b>    |                       |                           |                          |                         |                        |                      |                        |         |
| 1                                                     | Observational studies | Very serious <sup>1</sup> | No serious inconsistency | No serious indirectness | No serious imprecision | None                 | OR 4.54 (2.78 to 7.41) | LOW     |
| <b>Long term use – Mixed</b>                          |                       |                           |                          |                         |                        |                      |                        |         |
| 1                                                     | Observational studies | Very serious <sup>1</sup> | No serious inconsistency | No serious indirectness | No serious imprecision | None                 | OR 3.23 (1.96 to 5.32) | LOW     |

<sup>1</sup>Downgraded by 1 increment if the majority of the evidence was at high risk of bias and by 2 increments if the majority of the evidence was at very high risk of bias

## 1.3 Interventions for prevention or treatment of dependence, withdrawal or discontinuation syndrome

### 1.3.1 Opioids

**Table 85: Evidence profile: Managed withdrawal (tapering + Ondansetron + Naloxone) versus Managed withdrawal (tapering + placebo + Naloxone)**

| Quality assessment                                                                                                                                                                |                   |                           |                          |                         |                           |                      | No of patients                                                                                                   |         | Effect            |                                            | Quality          | Importance |
|-----------------------------------------------------------------------------------------------------------------------------------------------------------------------------------|-------------------|---------------------------|--------------------------|-------------------------|---------------------------|----------------------|------------------------------------------------------------------------------------------------------------------|---------|-------------------|--------------------------------------------|------------------|------------|
| No of studies                                                                                                                                                                     | Design            | Risk of bias              | Inconsistency            | Indirectness            | Imprecision               | Other considerations | Managed withdrawal (tapering + Ondansetron + Naloxone) versus Managed withdrawal (tapering + placebo + Naloxone) | Control | Relative (95% CI) | Absolute                                   |                  |            |
| <b>Signs and symptoms/overall withdrawal syndrome (OOWS score) following induction of withdrawal (range of scores: 0-13; Better indicated by lower values)</b>                    |                   |                           |                          |                         |                           |                      |                                                                                                                  |         |                   |                                            |                  |            |
| 1                                                                                                                                                                                 | randomised trials | very serious <sup>1</sup> | no serious inconsistency | no serious indirectness | very serious <sup>2</sup> | none                 | 23                                                                                                               | 25      | -                 | MD 0 higher (1.39 lower to 1.39 higher)    | ⊕000<br>VERY LOW | CRITICAL   |
| <b>Signs and symptoms/overall withdrawal syndrome (SOWS score) following induction of withdrawal (range of scores: 0-64; Better indicated by lower values)</b>                    |                   |                           |                          |                         |                           |                      |                                                                                                                  |         |                   |                                            |                  |            |
| 1                                                                                                                                                                                 | randomised trials | very serious <sup>1</sup> | no serious inconsistency | no serious indirectness | serious <sup>2</sup>      | none                 | 23                                                                                                               | 25      | -                 | MD 4.1 higher (2.78 lower to 10.98 higher) | ⊕000<br>VERY LOW | CRITICAL   |
| <b>Quality of life - psychological health (POMS score) following induction of withdrawal (Better indicated by lower values)</b>                                                   |                   |                           |                          |                         |                           |                      |                                                                                                                  |         |                   |                                            |                  |            |
| 1                                                                                                                                                                                 | randomised trials | very serious <sup>1</sup> | no serious inconsistency | no serious indirectness | serious <sup>2</sup>      | none                 | 23                                                                                                               | 25      | -                 | MD 10 higher (7.04 lower to 27.04 higher)  | ⊕000<br>VERY LOW | CRITICAL   |
| <b>Quality of life - psychological health (Beck Depression Inventory change score) at 1 month of morphine treatment (range of scores: 0-63; Better indicated by lower values)</b> |                   |                           |                          |                         |                           |                      |                                                                                                                  |         |                   |                                            |                  |            |
| 1                                                                                                                                                                                 | randomised trials | very serious <sup>1</sup> | no serious inconsistency | no serious indirectness | serious <sup>2</sup>      | none                 | 23                                                                                                               | 25      | -                 | MD 0.8 lower (2.41 lower to 0.81 higher)   | ⊕000<br>VERY LOW | CRITICAL   |
| <b>Quality of life - physical health (Roland Morris Disability Index change score) at 1 month of morphine treatment (range of scores: 0-24; Better indicated by lower values)</b> |                   |                           |                          |                         |                           |                      |                                                                                                                  |         |                   |                                            |                  |            |
| 1                                                                                                                                                                                 | randomised trials | very serious <sup>1</sup> | no serious inconsistency | no serious indirectness | serious <sup>2</sup>      | none                 | 23                                                                                                               | 25      | -                 | MD 2.6 lower (4.7 to 0.5 lower)            | ⊕000<br>VERY LOW | CRITICAL   |

<sup>1</sup> Downgraded by 1 increment if the majority of the evidence was at high risk of bias, and downgraded by 2 increments if the majority of the evidence was at very high risk of bias

<sup>2</sup> Downgraded by 1 increment if the confidence interval crossed one MID or by 2 increments if the confidence interval crossed both MIDs

**Table 86: Evidence profile: Managed withdrawal (Ondansetron + Naloxone) versus Managed withdrawal (placebo + Naloxone)**

| Quality assessment                                                                                                           |                   |                           |                          |                         |                        |                      | No of patients                                                                             |         | Effect            |                                           | Quality          | Importance |
|------------------------------------------------------------------------------------------------------------------------------|-------------------|---------------------------|--------------------------|-------------------------|------------------------|----------------------|--------------------------------------------------------------------------------------------|---------|-------------------|-------------------------------------------|------------------|------------|
| No of studies                                                                                                                | Design            | Risk of bias              | Inconsistency            | Indirectness            | Imprecision            | Other considerations | Managed withdrawal (Ondansetron + Naloxone) versus Managed withdrawal (placebo + Naloxone) | Control | Relative (95% CI) | Absolute                                  |                  |            |
| <b>Signs and symptoms/overall withdrawal syndrome (OOWS score) (range of scores: 0-13; Better indicated by lower values)</b> |                   |                           |                          |                         |                        |                      |                                                                                            |         |                   |                                           |                  |            |
| 1                                                                                                                            | randomised trials | very serious <sup>1</sup> | no serious inconsistency | no serious indirectness | no serious imprecision | none                 | 33                                                                                         | 33      | -                 | MD 0 higher (1.11 lower to 1.11 higher)   | ⊕⊕⊕⊕<br>LOW      | CRITICAL   |
| <b>Signs and symptoms/overall withdrawal syndrome (SOWS score) (range of scores: 0-64; Better indicated by lower values)</b> |                   |                           |                          |                         |                        |                      |                                                                                            |         |                   |                                           |                  |            |
| 1                                                                                                                            | randomised trials | very serious <sup>1</sup> | no serious inconsistency | no serious indirectness | serious <sup>2</sup>   | none                 | 33                                                                                         | 33      | -                 | MD 0.3 higher (5.23 lower to 5.83 higher) | ⊕⊕⊕⊕<br>VERY LOW | CRITICAL   |
| <b>Quality of life - psychological health (POMS score) (Better indicated by lower values)</b>                                |                   |                           |                          |                         |                        |                      |                                                                                            |         |                   |                                           |                  |            |
| 1                                                                                                                            | randomised trials | very serious <sup>1</sup> | no serious inconsistency | no serious indirectness | no serious imprecision | none                 | 33                                                                                         | 33      | -                 | MD 1 higher (15.52 lower to 17.52 higher) | ⊕⊕⊕⊕<br>LOW      | CRITICAL   |

<sup>1</sup> Downgraded by 1 increment if the majority of the evidence was at high risk of bias, and downgraded by 2 increments if the majority of the evidence was at very high risk of bias

<sup>2</sup> Downgraded by 1 increment if the confidence interval crossed one MID or by 2 increments if the confidence interval crossed both MIDs

**Table 87: Evidence profile: Prescriber education/skills/knowledge/support (notification of overdose letter to GP) versus Usual care**

| Quality assessment                                                                                                           |                   |                      |                          |                      |                        |                      | No of patients                                                                                          |         | Effect            |                                 | Quality  | Importance |
|------------------------------------------------------------------------------------------------------------------------------|-------------------|----------------------|--------------------------|----------------------|------------------------|----------------------|---------------------------------------------------------------------------------------------------------|---------|-------------------|---------------------------------|----------|------------|
| No of studies                                                                                                                | Design            | Risk of bias         | Inconsistency            | Indirectness         | Imprecision            | Other considerations | Prescriber education/skills/knowledge/support (notification of overdose letter to GP) versus Usual care | Control | Relative (95% CI) | Absolute                        |          |            |
| <b>Reduction in prescribing (mean daily mg morphine equivalent) (follow-up 1-4 months; Better indicated by lower values)</b> |                   |                      |                          |                      |                        |                      |                                                                                                         |         |                   |                                 |          |            |
| 1                                                                                                                            | randomised trials | serious <sup>1</sup> | no serious inconsistency | serious <sup>2</sup> | no serious imprecision | none                 | 388                                                                                                     | 438     | -                 | MD 6 lower (8.54 to 3.46 lower) | ⊕⊕⊕⊕ LOW | CRITICAL   |

<sup>1</sup> Downgraded by 1 increment if the majority of the evidence was at high risk of bias, and downgraded by 2 increments if the majority of the evidence was at very high risk of bias

<sup>2</sup> Downgraded by 1 or 2 increments because the majority of the evidence included an indirect population (downgrade by one increment) or a very indirect population (downgrade by two increments)

**Table 88: Evidence profile: Patient advice and support (Mindfulness based recovery enhancement) versus Patient advice and support (conventional support group)**

| Quality assessment                                                                                                                                                                                                 |                   |                           |                          |                      |                        |                      | No of patients                                                                                                                     |         | Effect            |                                    | Quality       | Importance |
|--------------------------------------------------------------------------------------------------------------------------------------------------------------------------------------------------------------------|-------------------|---------------------------|--------------------------|----------------------|------------------------|----------------------|------------------------------------------------------------------------------------------------------------------------------------|---------|-------------------|------------------------------------|---------------|------------|
| No of studies                                                                                                                                                                                                      | Design            | Risk of bias              | Inconsistency            | Indirectness         | Imprecision            | Other considerations | Patient advice and support (Mindfulness based recovery enhancement) versus Patient advice and support (conventional support group) | Control | Relative (95% CI) | Absolute                           |               |            |
| <b>Quality of life - psychological health (pain interference) post intervention (measured with: Brief Pain Inventory pain interference sub scale ; range of scores: 0-10; Better indicated by lower values)</b>    |                   |                           |                          |                      |                        |                      |                                                                                                                                    |         |                   |                                    |               |            |
| 1                                                                                                                                                                                                                  | randomised trials | very serious <sup>1</sup> | no serious inconsistency | serious <sup>2</sup> | no serious imprecision | none                 | 31                                                                                                                                 | 38      | -                 | MD 1.68 lower (2.5 to 0.86 lower)  | ⊕⊕⊕⊕ VERY LOW | CRITICAL   |
| <b>Quality of life - psychological health (pain interference) at 3 month follow up (measured with: Brief Pain Inventory pain interference sub scale ; range of scores: 0-10; Better indicated by lower values)</b> |                   |                           |                          |                      |                        |                      |                                                                                                                                    |         |                   |                                    |               |            |
| 1                                                                                                                                                                                                                  | randomised trials | very serious <sup>1</sup> | no serious inconsistency | serious <sup>2</sup> | serious <sup>3</sup>   | none                 | 23                                                                                                                                 | 28      | -                 | MD 2.15 lower (3.44 to 0.86 lower) | ⊕⊕⊕⊕ VERY LOW | CRITICAL   |

| <b>Signs and symptoms/overall withdrawal syndrome (opioid craving) post intervention (range of scores: 1-10; Better indicated by lower values)</b>                                                                                     |                   |                           |                          |                      |                      |      |    |    |   |                                            |                  |          |
|----------------------------------------------------------------------------------------------------------------------------------------------------------------------------------------------------------------------------------------|-------------------|---------------------------|--------------------------|----------------------|----------------------|------|----|----|---|--------------------------------------------|------------------|----------|
| 1                                                                                                                                                                                                                                      | randomised trials | very serious <sup>1</sup> | no serious inconsistency | serious <sup>2</sup> | serious <sup>3</sup> | none | 31 | 38 | - | MD 1.72 lower (2.93 to 0.51 lower)         | ⊕000<br>VERY LOW | CRITICAL |
| <b>Signs and symptoms/overall withdrawal syndrome (opioid craving) at 3 month follow up (range of scores: 1-10; Better indicated by lower values)</b>                                                                                  |                   |                           |                          |                      |                      |      |    |    |   |                                            |                  |          |
| 1                                                                                                                                                                                                                                      | randomised trials | very serious <sup>1</sup> | no serious inconsistency | serious <sup>2</sup> | serious <sup>3</sup> | none | 23 | 28 | - | MD 0.63 lower (2.31 lower to 1.05 higher)  | ⊕000<br>VERY LOW | CRITICAL |
| <b>Signs and symptoms/overall withdrawal syndrome (signs of affective/sympathetic stress) post intervention - Sympathetic arousal (measured with: 56-item Calgary Symptoms of Stress Inventory ; Better indicated by lower values)</b> |                   |                           |                          |                      |                      |      |    |    |   |                                            |                  |          |
| 1                                                                                                                                                                                                                                      | randomised trials | very serious <sup>1</sup> | no serious inconsistency | serious <sup>2</sup> | serious <sup>3</sup> | none | 31 | 38 | - | MD 4.24 lower (7.5 to 0.98 lower)          | ⊕000<br>VERY LOW | CRITICAL |
| <b>Signs and symptoms/overall withdrawal syndrome (signs of affective/sympathetic stress) post intervention - Depression (measured with: 56-item Calgary Symptoms of Stress Inventory ; Better indicated by lower values)</b>          |                   |                           |                          |                      |                      |      |    |    |   |                                            |                  |          |
| 1                                                                                                                                                                                                                                      | randomised trials | very serious <sup>1</sup> | no serious inconsistency | serious <sup>2</sup> | serious <sup>3</sup> | none | 31 | 38 | - | MD 2.56 lower (5.79 lower to 0.67 higher)  | ⊕000<br>VERY LOW | CRITICAL |
| <b>Signs and symptoms/overall withdrawal syndrome (signs of affective/sympathetic stress) post intervention - Anger (measured with: 56-item Calgary Symptoms of Stress Inventory ; Better indicated by lower values)</b>               |                   |                           |                          |                      |                      |      |    |    |   |                                            |                  |          |
| 1                                                                                                                                                                                                                                      | randomised trials | very serious <sup>1</sup> | no serious inconsistency | serious <sup>2</sup> | serious <sup>3</sup> | none | 31 | 38 | - | MD 0.81 higher (2.03 lower to 3.65 higher) | ⊕000<br>VERY LOW | CRITICAL |
| <b>Signs and symptoms/overall withdrawal syndrome (signs of affective/sympathetic stress) post intervention - Cognitive (measured with: 56-item Calgary Symptoms of Stress Inventory ; Better indicated by lower values)</b>           |                   |                           |                          |                      |                      |      |    |    |   |                                            |                  |          |
| 1                                                                                                                                                                                                                                      | randomised trials | very serious <sup>1</sup> | no serious inconsistency | serious <sup>2</sup> | serious <sup>3</sup> | none | 31 | 38 | - | MD 1.75 lower (3.82 lower to 0.32 higher)  | ⊕000<br>VERY LOW | CRITICAL |
| <b>Signs and symptoms/overall withdrawal syndrome (signs of affective/sympathetic stress) post intervention - Muscle tension (measured with: 56-item Calgary Symptoms of Stress Inventory ; Better indicated by lower values)</b>      |                   |                           |                          |                      |                      |      |    |    |   |                                            |                  |          |
| 1                                                                                                                                                                                                                                      | randomised trials | very serious <sup>1</sup> | no serious inconsistency | serious <sup>2</sup> | serious <sup>3</sup> | none | 31 | 38 | - | MD 1.76 lower (5.16 lower to 1.64 higher)  | ⊕000<br>VERY LOW | CRITICAL |

| <b>Signs and symptoms/overall withdrawal syndrome (signs of affective/sympathetic stress) post intervention - Cardiopulmonary (measured with: 56-item Calgary Symptoms of Stress Inventory ; Better indicated by lower values)</b>   |                   |                           |                          |                      |                      |      |    |    |   |                                           |                  |          |
|--------------------------------------------------------------------------------------------------------------------------------------------------------------------------------------------------------------------------------------|-------------------|---------------------------|--------------------------|----------------------|----------------------|------|----|----|---|-------------------------------------------|------------------|----------|
| 1                                                                                                                                                                                                                                    | randomised trials | very serious <sup>1</sup> | no serious inconsistency | serious <sup>2</sup> | serious <sup>3</sup> | none | 31 | 38 | - | MD 3.68 lower (6.13 to 1.23 lower)        | ⊕○○○<br>VERY LOW | CRITICAL |
| <b>Signs and symptoms/overall withdrawal syndrome (signs of affective/sympathetic stress) post intervention - Neurological (measured with: 56-item Calgary Symptoms of Stress Inventory ; Better indicated by lower values)</b>      |                   |                           |                          |                      |                      |      |    |    |   |                                           |                  |          |
| 1                                                                                                                                                                                                                                    | randomised trials | very serious <sup>1</sup> | no serious inconsistency | serious <sup>2</sup> | serious <sup>3</sup> | none | 31 | 38 | - | MD 2.78 lower (4.86 to 0.7 lower)         | ⊕○○○<br>VERY LOW | CRITICAL |
| <b>Signs and symptoms/overall withdrawal syndrome (signs of affective/sympathetic stress) post intervention - Upper respiratory (measured with: 56-item Calgary Symptoms of Stress Inventory ; Better indicated by lower values)</b> |                   |                           |                          |                      |                      |      |    |    |   |                                           |                  |          |
| 1                                                                                                                                                                                                                                    | randomised trials | very serious <sup>1</sup> | no serious inconsistency | serious <sup>2</sup> | serious <sup>3</sup> | none | 31 | 38 | - | MD 2.27 lower (4.61 lower to 0.07 higher) | ⊕○○○<br>VERY LOW | CRITICAL |
| <b>Rates of lapse/relapse (Current opioid misuse measure) post treatment (Better indicated by lower values)</b>                                                                                                                      |                   |                           |                          |                      |                      |      |    |    |   |                                           |                  |          |
| 1                                                                                                                                                                                                                                    | randomised trials | very serious <sup>1</sup> | no serious inconsistency | serious <sup>2</sup> | serious <sup>3</sup> | none | 31 | 38 | - | MD 4.41 lower (8.48 to 0.34 lower)        | ⊕○○○<br>VERY LOW | CRITICAL |
| <b>Rates of lapse/relapse (Current opioid misuse measure) at 3 months follow up (Better indicated by lower values)</b>                                                                                                               |                   |                           |                          |                      |                      |      |    |    |   |                                           |                  |          |
| 1                                                                                                                                                                                                                                    | randomised trials | very serious <sup>1</sup> | no serious inconsistency | serious <sup>2</sup> | serious <sup>3</sup> | none | 23 | 28 | - | MD 2.54 lower (6.71 lower to 1.63 higher) | ⊕○○○<br>VERY LOW | CRITICAL |

<sup>1</sup> Downgraded by 1 increment if the majority of the evidence was at high risk of bias, and downgraded by 2 increments if the majority of the evidence was at very high risk of bias

<sup>2</sup> Downgraded by 1 or 2 increments because the majority of the evidence included an indirect population (downgrade by one increment) or a very indirect population (downgrade by two increments)

<sup>3</sup> Downgraded by 1 increment if the confidence interval crossed one MID or by 2 increments if the confidence interval crossed both MIDs

**Table 89: Evidence profile: Support for patients around medication management versus Usual care**

| Quality assessment                                                                                                                                       |                   |                           |                          |                      |                           |                      | No of patients                                                      |         | Effect            |                                              | Quality          | Importance |
|----------------------------------------------------------------------------------------------------------------------------------------------------------|-------------------|---------------------------|--------------------------|----------------------|---------------------------|----------------------|---------------------------------------------------------------------|---------|-------------------|----------------------------------------------|------------------|------------|
| No of studies                                                                                                                                            | Design            | Risk of bias              | Inconsistency            | Indirectness         | Imprecision               | Other considerations | Support for patients around medication management versus Usual care | Control | Relative (95% CI) | Absolute                                     |                  |            |
| <b>Quality of life - psychological (mood) - Depressed/discouraged (follow-up 6 months; range of scores: 0-100; Better indicated by lower values)</b>     |                   |                           |                          |                      |                           |                      |                                                                     |         |                   |                                              |                  |            |
| 1                                                                                                                                                        | randomised trials | very serious <sup>1</sup> | no serious inconsistency | serious <sup>2</sup> | very serious <sup>3</sup> | none                 | 17                                                                  | 21      | -                 | MD 2.35 lower (23.13 lower to 18.43 higher)  | ⊕000<br>VERY LOW | CRITICAL   |
| <b>Quality of life - psychological (mood) - Tense/anxious (follow-up 6 months; range of scores: 0-100; Better indicated by lower values)</b>             |                   |                           |                          |                      |                           |                      |                                                                     |         |                   |                                              |                  |            |
| 1                                                                                                                                                        | randomised trials | very serious <sup>1</sup> | no serious inconsistency | serious <sup>2</sup> | serious <sup>3</sup>      | none                 | 17                                                                  | 21      | -                 | MD 9.34 lower (28.48 lower to 9.8 higher)    | ⊕000<br>VERY LOW | CRITICAL   |
| <b>Quality of life - psychological (mood) - Irritable/angry (follow-up 6 months; range of scores: 0-100; Better indicated by lower values)</b>           |                   |                           |                          |                      |                           |                      |                                                                     |         |                   |                                              |                  |            |
| 1                                                                                                                                                        | randomised trials | very serious <sup>1</sup> | no serious inconsistency | serious <sup>2</sup> | very serious <sup>3</sup> | none                 | 17                                                                  | 21      | -                 | MD 3.83 higher (15.82 lower to 23.48 higher) | ⊕000<br>VERY LOW | CRITICAL   |
| <b>Quality of life - psychological (mood) - Sleep interference (follow-up 6 months; range of scores: 0-100; Better indicated by lower values)</b>        |                   |                           |                          |                      |                           |                      |                                                                     |         |                   |                                              |                  |            |
| 1                                                                                                                                                        | randomised trials | very serious <sup>1</sup> | no serious inconsistency | serious <sup>2</sup> | very serious <sup>3</sup> | none                 | 17                                                                  | 21      | -                 | MD 1.05 higher (16.84 lower to 18.94 higher) | ⊕000<br>VERY LOW | CRITICAL   |
| <b>Quality of life - physical (activity interference) - Daily routine (follow-up 6 months; range of scores: 0-100; Better indicated by lower values)</b> |                   |                           |                          |                      |                           |                      |                                                                     |         |                   |                                              |                  |            |
| 1                                                                                                                                                        | randomised trials | very serious <sup>1</sup> | no serious inconsistency | serious <sup>2</sup> | serious <sup>3</sup>      | none                 | 17                                                                  | 21      | -                 | MD 3.27 lower (20.68 lower to 14.14 higher)  | ⊕000<br>VERY LOW | CRITICAL   |
| <b>Quality of life - physical (activity interference) - Sex (follow-up 6 months; range of scores: 0-100; Better indicated by lower values)</b>           |                   |                           |                          |                      |                           |                      |                                                                     |         |                   |                                              |                  |            |
| 1                                                                                                                                                        | randomised trials | very serious <sup>1</sup> | no serious inconsistency | serious <sup>2</sup> | serious <sup>3</sup>      | none                 | 17                                                                  | 21      | -                 | MD 7.63 higher (16.04 lower to 31.3 higher)  | ⊕000<br>VERY LOW | CRITICAL   |



| Quality of life - physical (activity interference) - Appetite (follow-up 6 months; range of scores: 0-100; Better indicated by lower values)                                      |                   |                           |                          |                      |                           |      |                 |       |                           |                                                     |                  |          |
|-----------------------------------------------------------------------------------------------------------------------------------------------------------------------------------|-------------------|---------------------------|--------------------------|----------------------|---------------------------|------|-----------------|-------|---------------------------|-----------------------------------------------------|------------------|----------|
| 1                                                                                                                                                                                 | randomised trials | very serious <sup>1</sup> | no serious inconsistency | serious <sup>2</sup> | very serious <sup>3</sup> | none | 17              | 21    | -                         | MD 1.54 lower (21.22 lower to 18.14 higher)         | ⊕○○○<br>VERY LOW | CRITICAL |
| Quality of life - physical (activity interference) - Work (follow-up 6 months; range of scores: 0-100; Better indicated by lower values)                                          |                   |                           |                          |                      |                           |      |                 |       |                           |                                                     |                  |          |
| 1                                                                                                                                                                                 | randomised trials | very serious <sup>1</sup> | no serious inconsistency | serious <sup>2</sup> | serious <sup>3</sup>      | none | 17              | 21    | -                         | MD 8.18 lower (26.89 lower to 10.53 higher)         | ⊕○○○<br>VERY LOW | CRITICAL |
| Quality of life - social (activity interference) - Social (follow-up 6 months; range of scores: 0-100; Better indicated by lower values)                                          |                   |                           |                          |                      |                           |      |                 |       |                           |                                                     |                  |          |
| 1                                                                                                                                                                                 | randomised trials | very serious <sup>1</sup> | no serious inconsistency | serious <sup>2</sup> | very serious <sup>3</sup> | none | 17              | 21    | -                         | MD 0.1 lower (19.21 lower to 19.01 higher)          | ⊕○○○<br>VERY LOW | CRITICAL |
| Quality of life - social (activity interference) - Outdoor/recreation (follow-up 6 months; range of scores: 0-100; Better indicated by lower values)                              |                   |                           |                          |                      |                           |      |                 |       |                           |                                                     |                  |          |
| 1                                                                                                                                                                                 | randomised trials | very serious <sup>1</sup> | no serious inconsistency | serious <sup>2</sup> | very serious <sup>3</sup> | none | 17              | 21    | -                         | MD 0.32 higher (16.77 lower to 17.41 higher)        | ⊕○○○<br>VERY LOW | CRITICAL |
| Rates of lapse/relapse (drug misuse) (follow-up 6 months; assessed with: Drug misuse index)                                                                                       |                   |                           |                          |                      |                           |      |                 |       |                           |                                                     |                  |          |
| 1                                                                                                                                                                                 | randomised trials | very serious <sup>1</sup> | no serious inconsistency | serious <sup>2</sup> | no serious imprecision    | none | 5/19<br>(26.3%) | 73.7% | RR 0.36<br>(0.16 to 0.79) | 472 fewer per 1000<br>(from 155 fewer to 619 fewer) | ⊕○○○<br>VERY LOW | CRITICAL |
| Signs and symptoms/overall withdrawal syndrome (Hospital Anxiety and Depression scale) - Anxiety (follow-up 6 months; range of scores: 0-21; Better indicated by lower values)    |                   |                           |                          |                      |                           |      |                 |       |                           |                                                     |                  |          |
| 1                                                                                                                                                                                 | randomised trials | serious <sup>1</sup>      | no serious inconsistency | serious <sup>2</sup> | serious <sup>3</sup>      | none | 19              | 19    | -                         | MD 2.62 lower (4.9 to 0.34 lower)                   | ⊕○○○<br>VERY LOW | CRITICAL |
| Signs and symptoms/overall withdrawal syndrome (Hospital Anxiety and Depression scale) - Depression (follow-up 6 months; range of scores: 0-21; Better indicated by lower values) |                   |                           |                          |                      |                           |      |                 |       |                           |                                                     |                  |          |
| 1                                                                                                                                                                                 | randomised trials | very serious <sup>1</sup> | no serious inconsistency | serious <sup>2</sup> | serious <sup>3</sup>      | none | 19              | 19    | -                         | MD 3 lower (5.44 to 0.56 lower)                     | ⊕○○○<br>VERY LOW | CRITICAL |

<sup>1</sup> Downgraded by 1 increment if the majority of the evidence was at high risk of bias, and downgraded by 2 increments if the majority of the evidence was at very high risk of bias

<sup>2</sup> Downgraded by 1 or 2 increments because the majority of the evidence included an indirect population (downgrade by one increment) or a very indirect population (downgrade by two increments)

<sup>3</sup> Downgraded by 1 increment if the confidence interval crossed one MID or by 2 increments if the confidence interval crossed both MIDs

**Table 90: Evidence profile: Managed withdrawal (taper + support) versus Usual care (maintenance of treatment)**

| Quality assessment                                                                                                                                                                        |                   |                           |                          |                      |                           |                      | No of patients                                                                    |         | Effect            |                                              | Quality          | Importance |
|-------------------------------------------------------------------------------------------------------------------------------------------------------------------------------------------|-------------------|---------------------------|--------------------------|----------------------|---------------------------|----------------------|-----------------------------------------------------------------------------------|---------|-------------------|----------------------------------------------|------------------|------------|
| No of studies                                                                                                                                                                             | Design            | Risk of bias              | Inconsistency            | Indirectness         | Imprecision               | Other considerations | Managed withdrawal (taper + support) versus Usual care (maintenance of treatment) | Control | Relative (95% CI) | Absolute                                     |                  |            |
| <b>Reduction/cessation in prescribed drug use (daily opioid dose) (follow-up 4-6 weeks; Better indicated by lower values)</b>                                                             |                   |                           |                          |                      |                           |                      |                                                                                   |         |                   |                                              |                  |            |
| 1                                                                                                                                                                                         | randomised trials | very serious <sup>1</sup> | no serious inconsistency | serious <sup>2</sup> | serious <sup>3</sup>      | none                 | 12                                                                                | 18      | -                 | MD 74.2 lower (211.37 lower to 62.97 higher) | ⊕000<br>VERY LOW | CRITICAL   |
| <b>Signs and symptoms/overall withdrawal syndrome (Hospital anxiety and depression scale) - Anxiety (follow-up 4-6 weeks; range of scores: 0-21; Better indicated by lower values)</b>    |                   |                           |                          |                      |                           |                      |                                                                                   |         |                   |                                              |                  |            |
| 1                                                                                                                                                                                         | randomised trials | very serious <sup>1</sup> | no serious inconsistency | serious <sup>2</sup> | very serious <sup>3</sup> | none                 | 11                                                                                | 18      | -                 | MD 0.4 higher (2.49 lower to 3.29 higher)    | ⊕000<br>VERY LOW | CRITICAL   |
| <b>Signs and symptoms/overall withdrawal syndrome (Hospital anxiety and depression scale) - Depression (follow-up 4-6 weeks; range of scores: 0-21; Better indicated by lower values)</b> |                   |                           |                          |                      |                           |                      |                                                                                   |         |                   |                                              |                  |            |
| 1                                                                                                                                                                                         | randomised trials | very serious <sup>1</sup> | no serious inconsistency | serious <sup>2</sup> | very serious <sup>3</sup> | none                 | 11                                                                                | 18      | -                 | MD 0.4 higher (2.86 lower to 3.66 higher)    | ⊕000<br>VERY LOW | CRITICAL   |
| <b>Signs and symptoms/overall withdrawal syndrome (continuous reaction time) (follow-up 4-6 weeks; Better indicated by lower values)</b>                                                  |                   |                           |                          |                      |                           |                      |                                                                                   |         |                   |                                              |                  |            |
| 1                                                                                                                                                                                         | randomised trials | very serious <sup>1</sup> | no serious inconsistency | serious <sup>2</sup> | serious <sup>3</sup>      | none                 | 11                                                                                | 18      | -                 | MD 23.6 lower (48.31 lower to 1.11 higher)   | ⊕000<br>VERY LOW | CRITICAL   |
| <b>Signs and symptoms/overall withdrawal syndrome (finger tapping test) - Dominant hand (follow-up 4-6 weeks; Better indicated by higher values)</b>                                      |                   |                           |                          |                      |                           |                      |                                                                                   |         |                   |                                              |                  |            |
| 1                                                                                                                                                                                         | randomised trials | very serious <sup>1</sup> | no serious inconsistency | serious <sup>2</sup> | serious <sup>3</sup>      | none                 | 12                                                                                | 18      | -                 | MD 4.9 higher (2.98 lower to 12.78 higher)   | ⊕000<br>VERY LOW | CRITICAL   |
| <b>Signs and symptoms/overall withdrawal syndrome (finger tapping test) - Non-dominant hand (follow-up 4-6 weeks; Better indicated by higher values)</b>                                  |                   |                           |                          |                      |                           |                      |                                                                                   |         |                   |                                              |                  |            |
| 1                                                                                                                                                                                         | randomised trials | very serious <sup>1</sup> | no serious inconsistency | serious <sup>2</sup> | serious <sup>3</sup>      | none                 | 12                                                                                | 18      | -                 | MD 5.3 higher (1.03 lower to 11.63 higher)   | ⊕000<br>VERY LOW | CRITICAL   |

| <b>Signs and symptoms/overall withdrawal syndrome (digit span test) - Forwards (follow-up 4-6 weeks; range of scores: 0-14; Better indicated by higher values)</b>    |                   |                           |                          |                      |                           |      |    |    |   |                                              |                  |          |
|-----------------------------------------------------------------------------------------------------------------------------------------------------------------------|-------------------|---------------------------|--------------------------|----------------------|---------------------------|------|----|----|---|----------------------------------------------|------------------|----------|
| 1                                                                                                                                                                     | randomised trials | very serious <sup>1</sup> | no serious inconsistency | serious <sup>2</sup> | serious <sup>3</sup>      | none | 11 | 18 | - | MD 1 higher (0.99 lower to 2.99 higher)      | ⊕○○○<br>VERY LOW | CRITICAL |
| <b>Signs and symptoms/overall withdrawal syndrome (digit span test) - Backwards (follow-up 4-6 weeks; range of scores: 0-14; Better indicated by higher values)</b>   |                   |                           |                          |                      |                           |      |    |    |   |                                              |                  |          |
| 1                                                                                                                                                                     | randomised trials | very serious <sup>1</sup> | no serious inconsistency | serious <sup>2</sup> | very serious <sup>3</sup> | none | 11 | 18 | - | MD 1.2 higher (1.19 lower to 3.59 higher)    | ⊕○○○<br>VERY LOW | CRITICAL |
| <b>Signs and symptoms/overall withdrawal syndrome (trail making test B) (follow-up 4-6 weeks; Better indicated by lower values)</b>                                   |                   |                           |                          |                      |                           |      |    |    |   |                                              |                  |          |
| 1                                                                                                                                                                     | randomised trials | very serious <sup>1</sup> | no serious inconsistency | serious <sup>2</sup> | serious <sup>3</sup>      | none | 12 | 18 | - | MD 19.1 higher (13.36 lower to 51.56 higher) | ⊕○○○<br>VERY LOW | CRITICAL |
| <b>Signs and symptoms/overall withdrawal syndrome (Mini-mental state examination) (follow-up 4-6 weeks; range of scores: 0-30; Better indicated by higher values)</b> |                   |                           |                          |                      |                           |      |    |    |   |                                              |                  |          |
| 1                                                                                                                                                                     | randomised trials | very serious <sup>1</sup> | no serious inconsistency | serious <sup>2</sup> | serious <sup>3</sup>      | none | 12 | 18 | - | MD 0.3 higher (0.63 lower to 1.23 higher)    | ⊕○○○<br>VERY LOW | CRITICAL |

<sup>1</sup> Downgraded by 1 increment if the majority of the evidence was at high risk of bias, and downgraded by 2 increments if the majority of the evidence was at very high risk of bias

<sup>2</sup> Downgraded by 1 or 2 increments because the majority of the evidence included an indirect population (downgrade by one increment) or a very indirect population (downgrade by two increments)

<sup>3</sup> Downgraded by 1 increment if the confidence interval crossed one MID or by 2 increments if the confidence interval crossed both MIDs

**Table 91: Evidence profile: Prescriber education/skills/knowledge/support (nurse + registry + academic detailing + decision tools) versus Prescriber education/skills/knowledge/support (decision tools only)**

| Quality assessment                                                                                                                     |                   |                      |                          |                         |                      |                      | No of patients                                                                                                                                                              |         |                      | Effect   |             | Quality  | Importance |
|----------------------------------------------------------------------------------------------------------------------------------------|-------------------|----------------------|--------------------------|-------------------------|----------------------|----------------------|-----------------------------------------------------------------------------------------------------------------------------------------------------------------------------|---------|----------------------|----------|-------------|----------|------------|
| No of studies                                                                                                                          | Design            | Risk of bias         | Inconsistency            | Indirectness            | Imprecision          | Other considerations | Prescriber education/skills/knowledge/support (nurse+registry+academic detailing+decision tools) versus Prescriber education/skills/knowledge/support (decision tools only) | Control | Relative (95% CI)    | Absolute |             |          |            |
| <b>Cessation of medication (discontinuation of opioids) (follow-up 12 months)</b>                                                      |                   |                      |                          |                         |                      |                      |                                                                                                                                                                             |         |                      |          |             |          |            |
| 1                                                                                                                                      | randomised trials | serious <sup>1</sup> | no serious inconsistency | no serious indirectness | serious <sup>2</sup> | none                 | -                                                                                                                                                                           | 0%      | OR 1.5 (1 to 2.25)   | -        | ⊕⊕○○<br>LOW | CRITICAL |            |
| <b>Reduction/cessation in prescribed drug use (10% reduction in opioid dose among non-discontinued patients) (follow-up 12 months)</b> |                   |                      |                          |                         |                      |                      |                                                                                                                                                                             |         |                      |          |             |          |            |
| 1                                                                                                                                      | randomised trials | serious <sup>1</sup> | no serious inconsistency | no serious indirectness | serious <sup>2</sup> | none                 | -                                                                                                                                                                           | 0%      | OR 1.6 (1.1 to 2.33) | -        | ⊕⊕○○<br>LOW | CRITICAL |            |

<sup>1</sup> Downgraded by 1 increment if the majority of the evidence was at high risk of bias, and downgraded by 2 increments if the majority of the evidence was at very high risk of bias

<sup>2</sup> Downgraded by 1 increment if the confidence interval crossed one MID or by 2 increments if the confidence interval crossed both MIDs

**Table 92: Prescriber education/skills/knowledge/support (ACT based training) versus Prescriber education/skills/knowledge/support (standard training)**

| Quality assessment                                                                                                                                   |                   |                           |                          |                      |                        |                      | No of patients                                                                                                                              |         | Effect            |                                          | Quality          | Importance |
|------------------------------------------------------------------------------------------------------------------------------------------------------|-------------------|---------------------------|--------------------------|----------------------|------------------------|----------------------|---------------------------------------------------------------------------------------------------------------------------------------------|---------|-------------------|------------------------------------------|------------------|------------|
| No of studies                                                                                                                                        | Design            | Risk of bias              | Inconsistency            | Indirectness         | Imprecision            | Other considerations | Prescriber education/skills/knowledge/support (ACT based training) versus Prescriber education/skills/knowledge/support (standard training) | Control | Relative (95% CI) | Absolute                                 |                  |            |
| <b>Client satisfaction (training evaluation) (range of scores: 0-10; Better indicated by higher values)</b>                                          |                   |                           |                          |                      |                        |                      |                                                                                                                                             |         |                   |                                          |                  |            |
| 1                                                                                                                                                    | randomised trials | no serious risk of bias   | no serious inconsistency | serious <sup>1</sup> | no serious imprecision | none                 | 41                                                                                                                                          | 38      | -                 | MD 0 higher (1.13 lower to 1.13 higher)  | ⊕⊕⊕O<br>MODERATE | CRITICAL   |
| <b>Reduction in prescribing (rated frequency of prescribing opioids on a 5-point scale) (range of scores: 0-5; Better indicated by lower values)</b> |                   |                           |                          |                      |                        |                      |                                                                                                                                             |         |                   |                                          |                  |            |
| 1                                                                                                                                                    | randomised trials | very serious <sup>2</sup> | no serious inconsistency | serious <sup>1</sup> | serious <sup>3</sup>   | none                 | 41                                                                                                                                          | 38      | -                 | MD 0.1 lower (0.53 lower to 0.33 higher) | ⊕OOO<br>VERY LOW | CRITICAL   |

<sup>1</sup> Downgraded by 1 or 2 increments because the majority of the evidence included an indirect population (downgrade by one increment) or a very indirect population (downgrade by two increments)  
<sup>2</sup> Downgraded by 1 increment if the majority of the evidence was at high risk of bias, and downgraded by 2 increments if the majority of the evidence was at very high risk of bias  
<sup>3</sup> Downgraded by 1 increment if the confidence interval crossed one MID or by 2 increments if the confidence interval crossed both MIDs

**Table 93: Evidence profile: Prescriber education/skills/knowledge/support (GP notification) versus Prescriber education/skills/knowledge/support (GP educational materials)**

| Quality assessment                                                                                                                     |        |              |               |              |             |                      | No of patients                                                                                                                                  |         | Effect            |          | Quality | Importance |
|----------------------------------------------------------------------------------------------------------------------------------------|--------|--------------|---------------|--------------|-------------|----------------------|-------------------------------------------------------------------------------------------------------------------------------------------------|---------|-------------------|----------|---------|------------|
| No of studies                                                                                                                          | Design | Risk of bias | Inconsistency | Indirectness | Imprecision | Other considerations | Prescriber education/skills/knowledge/support (GP notification) versus Prescriber education/skills/knowledge/support (GP educational materials) | Control | Relative (95% CI) | Absolute |         |            |
| <b>Reduction in prescribing (opioid prescriptions per patient) at 91-270 days post intervention (Better indicated by lower values)</b> |        |              |               |              |             |                      |                                                                                                                                                 |         |                   |          |         |            |

|                                                                                                                    |                   |                           |                          |                      |                           |      |                 |       |                        |                                             |                  |          |
|--------------------------------------------------------------------------------------------------------------------|-------------------|---------------------------|--------------------------|----------------------|---------------------------|------|-----------------|-------|------------------------|---------------------------------------------|------------------|----------|
| 1                                                                                                                  | randomised trials | very serious <sup>1</sup> | no serious inconsistency | serious <sup>2</sup> | no serious imprecision    | none | 399             | 391   | -                      | MD 11.1 lower (12.41 to 9.79 lower)         | ⊕○○○<br>VERY LOW | CRITICAL |
| <b>Reduction in prescribing (chronic high-dose opioid use) at 91-270 days post intervention</b>                    |                   |                           |                          |                      |                           |      |                 |       |                        |                                             |                  |          |
| 1                                                                                                                  | randomised trials | very serious <sup>1</sup> | no serious inconsistency | serious <sup>2</sup> | very serious <sup>3</sup> | none | 26/399 (6.5%)   | 4.9%  | RR 1.34 (0.75 to 2.38) | 17 more per 1000 (from 12 fewer to 68 more) | ⊕○○○<br>VERY LOW | CRITICAL |
| <b>Uptake of psychosocial interventions (visits to mental health specialists) at 91-270 days post intervention</b> |                   |                           |                          |                      |                           |      |                 |       |                        |                                             |                  |          |
| 1                                                                                                                  | randomised trials | very serious <sup>1</sup> | no serious inconsistency | serious <sup>2</sup> | very serious <sup>3</sup> | none | 29/399 (7.3%)   | 6.4%  | RR 1.14 (0.68 to 1.91) | 9 more per 1000 (from 20 fewer to 58 more)  | ⊕○○○<br>VERY LOW | CRITICAL |
| <b>Lapse/relapse (diagnosis of opioid abuse) at 91-270 days post intervention</b>                                  |                   |                           |                          |                      |                           |      |                 |       |                        |                                             |                  |          |
| 1                                                                                                                  | randomised trials | very serious <sup>1</sup> | no serious inconsistency | serious <sup>2</sup> | very serious <sup>3</sup> | none | 39/368 (10.6%)  | 9.5%  | RR 1.12 (0.72 to 1.73) | 11 more per 1000 (from 27 fewer to 69 more) | ⊕○○○<br>VERY LOW | CRITICAL |
| <b>Lapse/relapse (opioid associated ED visits) at 91-270 days post intervention</b>                                |                   |                           |                          |                      |                           |      |                 |       |                        |                                             |                  |          |
| 1                                                                                                                  | randomised trials | very serious <sup>1</sup> | no serious inconsistency | serious <sup>2</sup> | serious <sup>3</sup>      | none | 104/399 (26.1%) | 25.6% | RR 1.02 (0.8 to 1.29)  | 5 more per 1000 (from 51 fewer to 74 more)  | ⊕○○○<br>VERY LOW | CRITICAL |

<sup>1</sup> Downgraded by 1 increment if the majority of the evidence was at high risk of bias, and downgraded by 2 increments if the majority of the evidence was at very high risk of bias

<sup>2</sup> Downgraded by 1 or 2 increments because the majority of the evidence included an indirect population (downgrade by one increment) or a very indirect population (downgrade by two increments)

<sup>3</sup> Downgraded by 1 increment if the confidence interval crossed one MID or by 2 increments if the confidence interval crossed both MIDs

**Table 94: Evidence profile: Prescriber education/skills/knowledge/support (GP notification) versus Prescriber education/skills/knowledge/support (GP notification + education)**

| Quality assessment |        |              |               |              |             |                      | No of patients                                                                    |         | Effect            |          | Quality | Importance |
|--------------------|--------|--------------|---------------|--------------|-------------|----------------------|-----------------------------------------------------------------------------------|---------|-------------------|----------|---------|------------|
| No of studies      | Design | Risk of bias | Inconsistency | Indirectness | Imprecision | Other considerations | Prescriber education/skills/knowledge/support (GP notification) versus Prescriber | Control | Relative (95% CI) | Absolute |         |            |

|                                                                                                                                        |                   |                           |                          |                      |                           |      | education/skills/knowledge/support (GP notification + education) |       |                        |                                              |                  |          |
|----------------------------------------------------------------------------------------------------------------------------------------|-------------------|---------------------------|--------------------------|----------------------|---------------------------|------|------------------------------------------------------------------|-------|------------------------|----------------------------------------------|------------------|----------|
| <b>Reduction in prescribing (opioid prescriptions per patient) at 91-270 days post intervention (Better indicated by lower values)</b> |                   |                           |                          |                      |                           |      |                                                                  |       |                        |                                              |                  |          |
| 1                                                                                                                                      | randomised trials | very serious <sup>1</sup> | no serious inconsistency | serious <sup>2</sup> | no serious imprecision    | none | 399                                                              | 408   | -                      | MD 11.5 lower (12.85 to 10.15 lower)         | ⊕○○○<br>VERY LOW | CRITICAL |
| <b>Reduction in prescribing (chronic high-dose opioid use) at 91-270 days post intervention</b>                                        |                   |                           |                          |                      |                           |      |                                                                  |       |                        |                                              |                  |          |
| 1                                                                                                                                      | randomised trials | very serious <sup>1</sup> | no serious inconsistency | serious <sup>2</sup> | very serious <sup>3</sup> | none | 26/399 (6.5%)                                                    | 6.9%  | RR 0.95 (0.57 to 1.59) | 3 fewer per 1000 (from 30 fewer to 41 more)  | ⊕○○○<br>VERY LOW | CRITICAL |
| <b>Uptake of psychosocial interventions (visits to mental health specialists) at 91-270 days post intervention</b>                     |                   |                           |                          |                      |                           |      |                                                                  |       |                        |                                              |                  |          |
| 1                                                                                                                                      | randomised trials | very serious <sup>1</sup> | no serious inconsistency | serious <sup>2</sup> | very serious <sup>3</sup> | none | 29/399 (7.3%)                                                    | 8.8%  | RR 0.82 (0.52 to 1.32) | 16 fewer per 1000 (from 42 fewer to 28 more) | ⊕○○○<br>VERY LOW | CRITICAL |
| <b>Lapse/relapse (diagnosis of opioid abuse) at 91-270 days post intervention</b>                                                      |                   |                           |                          |                      |                           |      |                                                                  |       |                        |                                              |                  |          |
| 1                                                                                                                                      | randomised trials | very serious <sup>1</sup> | no serious inconsistency | serious <sup>2</sup> | serious <sup>3</sup>      | none | 39/368 (10.6%)                                                   | 8.3%  | RR 1.28 (0.81 to 2.02) | 23 more per 1000 (from 16 fewer to 85 more)  | ⊕○○○<br>VERY LOW | CRITICAL |
| <b>Lapse/relapse (opioid associated ED visits) at 91-270 days post intervention</b>                                                    |                   |                           |                          |                      |                           |      |                                                                  |       |                        |                                              |                  |          |
| 1                                                                                                                                      | randomised trials | very serious <sup>1</sup> | no serious inconsistency | serious <sup>2</sup> | serious <sup>3</sup>      | none | 104/399 (26.1%)                                                  | 30.6% | RR 0.85 (0.68 to 1.06) | 46 fewer per 1000 (from 98 fewer to 18 more) | ⊕○○○<br>VERY LOW | CRITICAL |

<sup>1</sup> Downgraded by 1 increment if the majority of the evidence was at high risk of bias, and downgraded by 2 increments if the majority of the evidence was at very high risk of bias

<sup>2</sup> Downgraded by 1 or 2 increments because the majority of the evidence included an indirect population (downgrade by one increment) or a very indirect population (downgrade by two increments)

<sup>3</sup> Downgraded by 1 increment if the confidence interval crossed one MID or by 2 increments if the confidence interval crossed both MIDs

**Table 95: Evidence profile: Prescriber education/skills/knowledge/support (GP notification) versus Usual care (no communication)**

| Quality assessment                                                                                                                     |                   |                           |                          |                      |                           |                      | No of patients                                                                                       |         | Effect                 |                                              | Quality          | Importance |
|----------------------------------------------------------------------------------------------------------------------------------------|-------------------|---------------------------|--------------------------|----------------------|---------------------------|----------------------|------------------------------------------------------------------------------------------------------|---------|------------------------|----------------------------------------------|------------------|------------|
| No of studies                                                                                                                          | Design            | Risk of bias              | Inconsistency            | Indirectness         | Imprecision               | Other considerations | Prescriber education/skills/knowledge/support (GP notification) versus Usual care (no communication) | Control | Relative (95% CI)      | Absolute                                     |                  |            |
| <b>Reduction in prescribing (opioid prescriptions per patient) at 91-270 days post intervention (Better indicated by lower values)</b> |                   |                           |                          |                      |                           |                      |                                                                                                      |         |                        |                                              |                  |            |
| 1                                                                                                                                      | randomised trials | very serious <sup>1</sup> | no serious inconsistency | serious <sup>2</sup> | no serious imprecision    | none                 | 399                                                                                                  | 821     | -                      | MD 11.6 lower (12.61 to 10.59 lower)         | ⊕○○○<br>VERY LOW | CRITICAL   |
| <b>Reduction in prescribing (chronic high-dose opioid use) at 91-270 days post intervention</b>                                        |                   |                           |                          |                      |                           |                      |                                                                                                      |         |                        |                                              |                  |            |
| 1                                                                                                                                      | randomised trials | very serious <sup>1</sup> | no serious inconsistency | serious <sup>2</sup> | very serious <sup>3</sup> | none                 | 26/399 (6.5%)                                                                                        | 7.2%    | RR 0.91 (0.58 to 1.42) | 6 fewer per 1000 (from 30 fewer to 30 more)  | ⊕○○○<br>VERY LOW | CRITICAL   |
| <b>Uptake of psychosocial interventions (visits to mental health specialists) at 91-270 days post intervention</b>                     |                   |                           |                          |                      |                           |                      |                                                                                                      |         |                        |                                              |                  |            |
| 1                                                                                                                                      | randomised trials | very serious <sup>1</sup> | no serious inconsistency | serious <sup>2</sup> | very serious <sup>3</sup> | none                 | 29/399 (7.3%)                                                                                        | 7.1%    | RR 1.03 (0.67 to 1.58) | 2 more per 1000 (from 23 fewer to 41 more)   | ⊕○○○<br>VERY LOW | CRITICAL   |
| <b>Lapse/relapse (diagnosis of opioid abuse) at 91-270 days post intervention</b>                                                      |                   |                           |                          |                      |                           |                      |                                                                                                      |         |                        |                                              |                  |            |
| 1                                                                                                                                      | randomised trials | very serious <sup>1</sup> | no serious inconsistency | serious <sup>2</sup> | very serious <sup>3</sup> | none                 | 39/368 (10.6%)                                                                                       | 11.3%   | RR 0.93 (0.65 to 1.34) | 8 fewer per 1000 (from 40 fewer to 38 more)  | ⊕○○○<br>VERY LOW | CRITICAL   |
| <b>Lapse/relapse (opioid associated ED visits) at 91-270 days post intervention</b>                                                    |                   |                           |                          |                      |                           |                      |                                                                                                      |         |                        |                                              |                  |            |
| 1                                                                                                                                      | randomised trials | very serious <sup>1</sup> | no serious inconsistency | serious <sup>2</sup> | serious <sup>3</sup>      | none                 | 104/399 (26.1%)                                                                                      | 28.3%   | RR 0.92 (0.76 to 1.12) | 23 fewer per 1000 (from 68 fewer to 34 more) | ⊕○○○<br>VERY LOW | CRITICAL   |

<sup>1</sup> Downgraded by 1 increment if the majority of the evidence was at high risk of bias, and downgraded by 2 increments if the majority of the evidence was at very high risk of bias

<sup>2</sup> Downgraded by 1 or 2 increments because the majority of the evidence included an indirect population (downgrade by one increment) or a very indirect population (downgrade by two increments)

<sup>3</sup> Downgraded by 1 increment if the confidence interval crossed one MID or by 2 increments if the confidence interval crossed both MIDs



**Table 96: Evidence profile: Prescriber education/skills/knowledge/support (GP education) versus Prescriber education/skills/knowledge/support (GP notification + education)**

| Quality assessment                                                                                                                     |                   |                           |                          |                      |                           |                      | No of patients                                                                                                                                  |         | Effect                 |                                               | Quality          | Importance |
|----------------------------------------------------------------------------------------------------------------------------------------|-------------------|---------------------------|--------------------------|----------------------|---------------------------|----------------------|-------------------------------------------------------------------------------------------------------------------------------------------------|---------|------------------------|-----------------------------------------------|------------------|------------|
| No of studies                                                                                                                          | Design            | Risk of bias              | Inconsistency            | Indirectness         | Imprecision               | Other considerations | Prescriber education/skills/knowledge/support (GP education) versus Prescriber education/skills/knowledge/support (GP notification + education) | Control | Relative (95% CI)      | Absolute                                      |                  |            |
| <b>Reduction in prescribing (opioid prescriptions per patient) at 91-270 days post intervention (Better indicated by lower values)</b> |                   |                           |                          |                      |                           |                      |                                                                                                                                                 |         |                        |                                               |                  |            |
| 1                                                                                                                                      | randomised trials | very serious <sup>1</sup> | no serious inconsistency | serious <sup>2</sup> | no serious imprecision    | none                 | 391                                                                                                                                             | 408     | -                      | MD 0.4 lower (2.1 lower to 1.3 higher)        | ⊖000<br>VERY LOW | CRITICAL   |
| <b>Reduction in prescribing (chronic high-dose opioid use) at 91-270 days post intervention</b>                                        |                   |                           |                          |                      |                           |                      |                                                                                                                                                 |         |                        |                                               |                  |            |
| 1                                                                                                                                      | randomised trials | very serious <sup>1</sup> | no serious inconsistency | serious <sup>2</sup> | serious <sup>3</sup>      | none                 | 19/391 (4.9%)                                                                                                                                   | 6.9%    | RR 0.71 (0.4 to 1.25)  | 20 fewer per 1000 (from 41 fewer to 17 more)  | ⊖000<br>VERY LOW | CRITICAL   |
| <b>Uptake of psychosocial interventions (visits to mental health specialists) at 91-270 days post intervention</b>                     |                   |                           |                          |                      |                           |                      |                                                                                                                                                 |         |                        |                                               |                  |            |
| 1                                                                                                                                      | randomised trials | very serious <sup>1</sup> | no serious inconsistency | serious <sup>2</sup> | serious <sup>3</sup>      | none                 | 25/391 (6.4%)                                                                                                                                   | 8.8%    | RR 0.72 (0.44 to 1.18) | 25 fewer per 1000 (from 49 fewer to 16 more)  | ⊖000<br>VERY LOW | CRITICAL   |
| <b>Lapse/relapse (diagnosis of opioid abuse) at 91-270 days post intervention</b>                                                      |                   |                           |                          |                      |                           |                      |                                                                                                                                                 |         |                        |                                               |                  |            |
| 1                                                                                                                                      | randomised trials | very serious <sup>1</sup> | no serious inconsistency | serious <sup>2</sup> | very serious <sup>3</sup> | none                 | 34/358 (9.5%)                                                                                                                                   | 8.3%    | RR 1.15 (0.72 to 1.84) | 12 more per 1000 (from 23 fewer to 70 more)   | ⊖000<br>VERY LOW | CRITICAL   |
| <b>Lapse/relapse (opioid associated ED visits) at 91-270 days post intervention</b>                                                    |                   |                           |                          |                      |                           |                      |                                                                                                                                                 |         |                        |                                               |                  |            |
| 1                                                                                                                                      | randomised trials | very serious <sup>1</sup> | no serious inconsistency | serious <sup>2</sup> | serious <sup>3</sup>      | none                 | 100/391 (25.6%)                                                                                                                                 | 30.6%   | RR 0.83 (0.67 to 1.04) | 52 fewer per 1000 (from 101 fewer to 12 more) | ⊖000<br>VERY LOW | CRITICAL   |

<sup>1</sup> Downgraded by 1 increment if the majority of the evidence was at high risk of bias, and downgraded by 2 increments if the majority of the evidence was at very high risk of bias

<sup>2</sup> Downgraded by 1 or 2 increments because the majority of the evidence included an indirect population (downgrade by one increment) or a very indirect population (downgrade by two increments)

<sup>3</sup> Downgraded by 1 increment if the confidence interval crossed one MID or by 2 increments if the confidence interval crossed both MIDs

**Table 97: Evidence profile: Prescriber education/skills/knowledge/support (GP education) versus Usual care (no communication)**

| Quality assessment                                                                                                                     |                   |                           |                          |                      |                           |                      | No of patients                                                                                    |         | Effect                 |                                              | Quality          | Importance |
|----------------------------------------------------------------------------------------------------------------------------------------|-------------------|---------------------------|--------------------------|----------------------|---------------------------|----------------------|---------------------------------------------------------------------------------------------------|---------|------------------------|----------------------------------------------|------------------|------------|
| No of studies                                                                                                                          | Design            | Risk of bias              | Inconsistency            | Indirectness         | Imprecision               | Other considerations | Prescriber education/skills/knowledge/support (GP education) versus Usual care (no communication) | Control | Relative (95% CI)      | Absolute                                     |                  |            |
| <b>Reduction in prescribing (opioid prescriptions per patient) at 91-270 days post intervention (Better indicated by lower values)</b> |                   |                           |                          |                      |                           |                      |                                                                                                   |         |                        |                                              |                  |            |
| 1                                                                                                                                      | randomised trials | very serious <sup>1</sup> | no serious inconsistency | serious <sup>2</sup> | no serious imprecision    | none                 | 391                                                                                               | 821     | -                      | MD 0.5 lower (1.94 lower to 0.94 higher)     | ⊕○○○<br>VERY LOW | CRITICAL   |
| <b>Reduction in prescribing (chronic high-dose opioid use) at 91-270 days post intervention</b>                                        |                   |                           |                          |                      |                           |                      |                                                                                                   |         |                        |                                              |                  |            |
| 1                                                                                                                                      | randomised trials | very serious <sup>1</sup> | no serious inconsistency | serious <sup>2</sup> | serious <sup>3</sup>      | none                 | 19/391 (4.9%)                                                                                     | 7.2%    | RR 0.68 (0.41 to 1.12) | 23 fewer per 1000 (from 42 fewer to 9 more)  | ⊕○○○<br>VERY LOW | CRITICAL   |
| <b>Uptake of psychosocial interventions (visits to mental health specialists) at 91-270 days post intervention</b>                     |                   |                           |                          |                      |                           |                      |                                                                                                   |         |                        |                                              |                  |            |
| 1                                                                                                                                      | randomised trials | very serious <sup>1</sup> | no serious inconsistency | serious <sup>2</sup> | very serious <sup>3</sup> | none                 | 25/391 (6.4%)                                                                                     | 7.1%    | RR 0.91 (0.58 to 1.42) | 6 fewer per 1000 (from 30 fewer to 30 more)  | ⊕○○○<br>VERY LOW | CRITICAL   |
| <b>Lapse/relapse (diagnosis of opioid abuse) at 91-270 days post intervention</b>                                                      |                   |                           |                          |                      |                           |                      |                                                                                                   |         |                        |                                              |                  |            |
| 1                                                                                                                                      | randomised trials | very serious <sup>1</sup> | no serious inconsistency | serious <sup>2</sup> | serious <sup>3</sup>      | none                 | 34/358 (9.5%)                                                                                     | 11.3%   | RR 0.84 (0.57 to 1.22) | 18 fewer per 1000 (from 49 fewer to 25 more) | ⊕○○○<br>VERY LOW | CRITICAL   |
| <b>Lapse/relapse (opioid associated ED visits) at 91-270 days post intervention</b>                                                    |                   |                           |                          |                      |                           |                      |                                                                                                   |         |                        |                                              |                  |            |

|   |                   |                           |                          |                      |                      |      |                 |       |                        |                                              |               |          |
|---|-------------------|---------------------------|--------------------------|----------------------|----------------------|------|-----------------|-------|------------------------|----------------------------------------------|---------------|----------|
| 1 | randomised trials | very serious <sup>1</sup> | no serious inconsistency | serious <sup>2</sup> | serious <sup>3</sup> | none | 100/391 (25.6%) | 28.3% | RR 0.91 (0.74 to 1.11) | 25 fewer per 1000 (from 74 fewer to 31 more) | ⊕○○○ VERY LOW | CRITICAL |
|---|-------------------|---------------------------|--------------------------|----------------------|----------------------|------|-----------------|-------|------------------------|----------------------------------------------|---------------|----------|

<sup>1</sup> Downgraded by 1 increment if the majority of the evidence was at high risk of bias, and downgraded by 2 increments if the majority of the evidence was at very high risk of bias

<sup>2</sup> Downgraded by 1 or 2 increments because the majority of the evidence included an indirect population (downgrade by one increment) or a very indirect population (downgrade by two increments)

<sup>3</sup> Downgraded by 1 increment if the confidence interval crossed one MID or by 2 increments if the confidence interval crossed both MIDs

**Table 98: Evidence profile: Prescriber education/skills/knowledge/support (GP notification + education) versus Usual care (no communication)**

| Quality assessment                                                                                                                     |                   |                           |                          |                      |                           |                      | No of patients                                                                                                   |         | Effect                 |                                              | Quality       | Importance |
|----------------------------------------------------------------------------------------------------------------------------------------|-------------------|---------------------------|--------------------------|----------------------|---------------------------|----------------------|------------------------------------------------------------------------------------------------------------------|---------|------------------------|----------------------------------------------|---------------|------------|
| No of studies                                                                                                                          | Design            | Risk of bias              | Inconsistency            | Indirectness         | Imprecision               | Other considerations | Prescriber education/skills/knowledge/support (GP notification + education) versus Usual care (no communication) | Control | Relative (95% CI)      | Absolute                                     |               |            |
| <b>Reduction in prescribing (opioid prescriptions per patient) at 91-270 days post intervention (Better indicated by lower values)</b> |                   |                           |                          |                      |                           |                      |                                                                                                                  |         |                        |                                              |               |            |
| 1                                                                                                                                      | randomised trials | very serious <sup>1</sup> | no serious inconsistency | serious <sup>2</sup> | no serious imprecision    | none                 | 408                                                                                                              | 821     | -                      | MD 0.1 lower (1.58 lower to 1.38 higher)     | ⊕○○○ VERY LOW | CRITICAL   |
| <b>Reduction in prescribing (chronic high-dose opioid use) at 91-270 days post intervention</b>                                        |                   |                           |                          |                      |                           |                      |                                                                                                                  |         |                        |                                              |               |            |
| 1                                                                                                                                      | randomised trials | very serious <sup>1</sup> | no serious inconsistency | serious <sup>2</sup> | very serious <sup>3</sup> | none                 | 28/409 (6.8%)                                                                                                    | 7.2%    | RR 0.95 (0.62 to 1.47) | 4 fewer per 1000 (from 27 fewer to 34 more)  | ⊕○○○ VERY LOW | CRITICAL   |
| <b>Uptake of psychosocial interventions (visits to mental health specialists) at 91-270 days post intervention</b>                     |                   |                           |                          |                      |                           |                      |                                                                                                                  |         |                        |                                              |               |            |
| 1                                                                                                                                      | randomised trials | very serious <sup>1</sup> | no serious inconsistency | serious <sup>2</sup> | serious <sup>3</sup>      | none                 | 36/408 (8.8%)                                                                                                    | 7.1%    | RR 1.25 (0.84 to 1.86) | 18 more per 1000 (from 11 fewer to 61 more)  | ⊕○○○ VERY LOW | CRITICAL   |
| <b>Lapse/relapse (diagnosis of opioid abuse) at 91-270 days post intervention</b>                                                      |                   |                           |                          |                      |                           |                      |                                                                                                                  |         |                        |                                              |               |            |
| 1                                                                                                                                      | randomised trials | very serious <sup>1</sup> | no serious inconsistency | serious <sup>2</sup> | serious <sup>3</sup>      | none                 | 30/363 (8.3%)                                                                                                    | 11.3%   | RR 0.73 (0.49 to 1.09) | 31 fewer per 1000 (from 58 fewer to 10 more) | ⊕○○○ VERY LOW | CRITICAL   |

| Lapse/relapse (opioid associated ED visits) at 91-270 days post intervention |                   |                           |                          |                      |                      |      |                 |       |                      |                                             |               |          |
|------------------------------------------------------------------------------|-------------------|---------------------------|--------------------------|----------------------|----------------------|------|-----------------|-------|----------------------|---------------------------------------------|---------------|----------|
| 1                                                                            | randomised trials | very serious <sup>1</sup> | no serious inconsistency | serious <sup>2</sup> | serious <sup>3</sup> | none | 125/408 (30.6%) | 28.3% | RR 1.08 (0.9 to 1.3) | 23 more per 1000 (from 28 fewer to 85 more) | ⊕○○○ VERY LOW | CRITICAL |

<sup>1</sup> Downgraded by 1 increment if the majority of the evidence was at high risk of bias, and downgraded by 2 increments if the majority of the evidence was at very high risk of bias

<sup>2</sup> Downgraded by 1 or 2 increments because the majority of the evidence included an indirect population (downgrade by one increment) or a very indirect population (downgrade by two increments)

<sup>3</sup> Downgraded by 1 increment if the confidence interval crossed one MID or by 2 increments if the confidence interval crossed both MIDs

**Table 99: Evidence profile: Patient advice and support (taper support) versus Usual care**

| Quality assessment                                                                                                                   |                   |                           |                          |                         |                           |                      | No of patients                                               |         | Effect                  |                                               | Quality       | Importance |
|--------------------------------------------------------------------------------------------------------------------------------------|-------------------|---------------------------|--------------------------|-------------------------|---------------------------|----------------------|--------------------------------------------------------------|---------|-------------------------|-----------------------------------------------|---------------|------------|
| No of studies                                                                                                                        | Design            | Risk of bias              | Inconsistency            | Indirectness            | Imprecision               | Other considerations | Patient advice and support (taper support) versus Usual care | Control | Relative (95% CI)       | Absolute                                      |               |            |
| <b>Reduction/cessation in prescribed drug use (morphine equivalent dose) post intervention (Better indicated by lower values)</b>    |                   |                           |                          |                         |                           |                      |                                                              |         |                         |                                               |               |            |
| 1                                                                                                                                    | randomised trials | very serious <sup>1</sup> | no serious inconsistency | no serious indirectness | <sup>2</sup>              | none                 | 16                                                           | 15      | -                       | MD 42.9 lower (92.42 lower to 6.62 higher)    | ⊕⊕○○ LOW      | CRITICAL   |
| <b>Reduction/cessation in prescribed drug use (morphine equivalent dose) at 3 month follow up (Better indicated by lower values)</b> |                   |                           |                          |                         |                           |                      |                                                              |         |                         |                                               |               |            |
| 1                                                                                                                                    | randomised trials | very serious <sup>1</sup> | no serious inconsistency | no serious indirectness | <sup>2</sup>              | none                 | 16                                                           | 16      | -                       | MD 26.71 lower (83.04 lower to 29.62 higher)  | ⊕⊕○○ LOW      | CRITICAL   |
| <b>Cessation of medication (complete discontinuation of opioids) post intervention</b>                                               |                   |                           |                          |                         |                           |                      |                                                              |         |                         |                                               |               |            |
| 1                                                                                                                                    | randomised trials | very serious <sup>1</sup> | no serious inconsistency | no serious indirectness | very serious <sup>3</sup> | none                 | 1/16 (6.3%)                                                  | 6.7%    | RR 0.94 (0.06 to 13.68) | 4 fewer per 1000 (from 63 fewer to 850 more)  | ⊕○○○ VERY LOW | CRITICAL   |
| <b>Cessation of medication (complete discontinuation of opioids) at 3 month follow up</b>                                            |                   |                           |                          |                         |                           |                      |                                                              |         |                         |                                               |               |            |
| 1                                                                                                                                    | randomised trials | very serious <sup>1</sup> | no serious inconsistency | no serious indirectness | very serious <sup>3</sup> | none                 | 2/16 (12.5%)                                                 | 12.5%   | RR 1 (0.16 to 6.25)     | 0 fewer per 1000 (from 105 fewer to 656 more) | ⊕○○○ VERY LOW | CRITICAL   |
| <b>Quality of life (at least moderately better on Patient Global Impression of Change) post intervention</b>                         |                   |                           |                          |                         |                           |                      |                                                              |         |                         |                                               |               |            |

|                                                                                                                                               |                   |                      |                          |                         |                      |      |                  |       |                        |                                                   |             |          |
|-----------------------------------------------------------------------------------------------------------------------------------------------|-------------------|----------------------|--------------------------|-------------------------|----------------------|------|------------------|-------|------------------------|---------------------------------------------------|-------------|----------|
| 1                                                                                                                                             | randomised trials | serious <sup>1</sup> | no serious inconsistency | no serious indirectness | serious <sup>3</sup> | none | 9/16<br>(56.3%)  | 20%   | RR 2.81 (0.94 to 8.45) | 362 more per 1000<br>(from 12 fewer to 1000 more) | ⊕⊕○○<br>LOW | CRITICAL |
| <b>Quality of life (at least moderately better on Patient Global Impression of Change) at 3 month follow up</b>                               |                   |                      |                          |                         |                      |      |                  |       |                        |                                                   |             |          |
| 1                                                                                                                                             | randomised trials | serious <sup>1</sup> | no serious inconsistency | no serious indirectness | serious <sup>3</sup> | none | 10/16<br>(62.5%) | 37.5% | RR 1.67 (0.8 to 3.49)  | 251 more per 1000<br>(from 75 fewer to 934 more)  | ⊕⊕○○<br>LOW | CRITICAL |
| <b>Quality of life - psychological (pain interference) post intervention (range of scores: 0-10; Better indicated by lower values)</b>        |                   |                      |                          |                         |                      |      |                  |       |                        |                                                   |             |          |
| 1                                                                                                                                             | randomised trials | serious <sup>1</sup> | no serious inconsistency | no serious indirectness | <sup>2</sup>         | none | 16               | 16    | -                      | MD 1.39 lower (2.78 lower to 0 higher)            | ⊕⊕○○<br>LOW | CRITICAL |
| <b>Quality of life - psychological (pain interference) at 3 month follow up (range of scores: 0-10; Better indicated by lower values)</b>     |                   |                      |                          |                         |                      |      |                  |       |                        |                                                   |             |          |
| 1                                                                                                                                             | randomised trials | serious <sup>1</sup> | no serious inconsistency | no serious indirectness | <sup>2</sup>         | none | 16               | 16    | -                      | MD 1.21 lower (2.43 lower to 0.01 higher)         | ⊕⊕○○<br>LOW | CRITICAL |
| <b>Quality of life - psychological (pain self-efficacy) post intervention (range of scores: 0-60; Better indicated by higher values)</b>      |                   |                      |                          |                         |                      |      |                  |       |                        |                                                   |             |          |
| 1                                                                                                                                             | randomised trials | serious <sup>1</sup> | no serious inconsistency | no serious indirectness | <sup>2</sup>         | none | 16               | 16    | -                      | MD 7.86 higher (1.22 to 14.5 higher)              | ⊕⊕○○<br>LOW | CRITICAL |
| <b>Quality of life - psychological (pain self-efficacy) at 3 month follow up (range of scores: 0-60; Better indicated by higher values)</b>   |                   |                      |                          |                         |                      |      |                  |       |                        |                                                   |             |          |
| 1                                                                                                                                             | randomised trials | serious <sup>1</sup> | no serious inconsistency | no serious indirectness | <sup>2</sup>         | none | 16               | 16    | -                      | MD 7.26 higher (2.14 lower to 16.66 higher)       | ⊕⊕○○<br>LOW | CRITICAL |
| <b>Quality of life (Prescription Opioids Difficulties Scale) post intervention - Problems sub scale (Better indicated by lower values)</b>    |                   |                      |                          |                         |                      |      |                  |       |                        |                                                   |             |          |
| 1                                                                                                                                             | randomised trials | serious <sup>1</sup> | no serious inconsistency | no serious indirectness | <sup>2</sup>         | none | 16               | 16    | -                      | MD 4.9 lower (8.4 to 1.4 lower)                   | ⊕⊕○○<br>LOW | CRITICAL |
| <b>Quality of life (Prescription Opioids Difficulties Scale) post intervention - Concerns sub scale (Better indicated by lower values)</b>    |                   |                      |                          |                         |                      |      |                  |       |                        |                                                   |             |          |
| 1                                                                                                                                             | randomised trials | serious <sup>1</sup> | no serious inconsistency | no serious indirectness | <sup>2</sup>         | none | 16               | 16    | -                      | MD 0.16 higher (3.74 lower to 4.06 higher)        | ⊕⊕○○<br>LOW | CRITICAL |
| <b>Quality of life (Prescription Opioids Difficulties Scale) at 3 month follow up - Problems sub scale (Better indicated by lower values)</b> |                   |                      |                          |                         |                      |      |                  |       |                        |                                                   |             |          |
| 1                                                                                                                                             | randomised trials | serious <sup>1</sup> | no serious inconsistency | no serious indirectness | <sup>2</sup>         | none | 16               | 16    | -                      | MD 4.47 lower (10.13 lower to 1.19 higher)        | ⊕⊕○○<br>LOW | CRITICAL |
| <b>Quality of life (Prescription Opioids Difficulties Scale) at 3 month follow up - Concerns sub scale (Better indicated by lower values)</b> |                   |                      |                          |                         |                      |      |                  |       |                        |                                                   |             |          |

|                                                                                                                                                                                    |                   |                      |                          |                         |              |      |    |    |   |                                            |             |          |
|------------------------------------------------------------------------------------------------------------------------------------------------------------------------------------|-------------------|----------------------|--------------------------|-------------------------|--------------|------|----|----|---|--------------------------------------------|-------------|----------|
| 1                                                                                                                                                                                  | randomised trials | serious <sup>1</sup> | no serious inconsistency | no serious indirectness | <sup>2</sup> | none | 16 | 16 | - | MD 1.62 higher (3.27 lower to 6.51 higher) | ⊕⊕○○<br>LOW | CRITICAL |
| <b>Signs and symptoms/overall withdrawal syndrome (Patient Health Questionnaire-9 - depression) post intervention (range of scores: 0-27; Better indicated by lower values)</b>    |                   |                      |                          |                         |              |      |    |    |   |                                            |             |          |
| 1                                                                                                                                                                                  | randomised trials | serious <sup>1</sup> | no serious inconsistency | no serious indirectness | <sup>2</sup> | none | 16 | 16 | - | MD 2.21 lower (6.62 lower to 2.2 higher)   | ⊕⊕○○<br>LOW | CRITICAL |
| <b>Signs and symptoms/overall withdrawal syndrome (Patient Health Questionnaire-9 - depression) at 3 month follow up (range of scores: 0-27; Better indicated by lower values)</b> |                   |                      |                          |                         |              |      |    |    |   |                                            |             |          |
| 1                                                                                                                                                                                  | randomised trials | serious <sup>1</sup> | no serious inconsistency | no serious indirectness | <sup>2</sup> | none | 16 | 16 | - | MD 1.89 lower (6.23 lower to 2.45 higher)  | ⊕⊕○○<br>LOW | CRITICAL |
| <b>Signs and symptoms/overall withdrawal syndrome (Generalised Anxiety Disorder-7) post intervention (range of scores: 0-21; Better indicated by lower values)</b>                 |                   |                      |                          |                         |              |      |    |    |   |                                            |             |          |
| 1                                                                                                                                                                                  | randomised trials | serious <sup>1</sup> | no serious inconsistency | no serious indirectness | <sup>2</sup> | none | 16 | 16 | - | MD 2.73 lower (5.99 lower to 0.53 higher)  | ⊕⊕○○<br>LOW | CRITICAL |
| <b>Signs and symptoms/overall withdrawal syndrome (Generalised Anxiety Disorder-7) at 3 month follow up (range of scores: 0-21; Better indicated by lower values)</b>              |                   |                      |                          |                         |              |      |    |    |   |                                            |             |          |
| 1                                                                                                                                                                                  | randomised trials | serious <sup>1</sup> | no serious inconsistency | no serious indirectness | <sup>2</sup> | none | 16 | 16 | - | MD 2.39 lower (5.79 lower to 1.01 higher)  | ⊕⊕○○<br>LOW | CRITICAL |
| <b>Signs and symptoms/overall withdrawal syndrome (Insomnia Severity Index) post intervention (range of scores: 0-28; Better indicated by lower values)</b>                        |                   |                      |                          |                         |              |      |    |    |   |                                            |             |          |
| 1                                                                                                                                                                                  | randomised trials | serious <sup>1</sup> | no serious inconsistency | no serious indirectness | <sup>2</sup> | none | 16 | 16 | - | MD 3.13 lower (7.22 lower to 0.96 higher)  | ⊕⊕○○<br>LOW | CRITICAL |
| <b>Signs and symptoms/overall withdrawal syndrome (Insomnia Severity Index) at 3 month follow up (range of scores: 0-28; Better indicated by lower values)</b>                     |                   |                      |                          |                         |              |      |    |    |   |                                            |             |          |
| 1                                                                                                                                                                                  | randomised trials | serious <sup>1</sup> | no serious inconsistency | no serious indirectness | <sup>2</sup> | none | 16 | 16 | - | MD 1.91 lower (5.49 lower to 1.67 higher)  | ⊕⊕○○<br>LOW | CRITICAL |
| <b>Signs and symptoms/overall withdrawal syndrome (Patient health questionnaire-15 somatic symptoms) post intervention (Better indicated by lower values)</b>                      |                   |                      |                          |                         |              |      |    |    |   |                                            |             |          |
| 1                                                                                                                                                                                  | randomised trials | serious <sup>1</sup> | no serious inconsistency | no serious indirectness | <sup>2</sup> | none | 16 | 16 | - | MD 1.47 lower (4.72 lower to 1.78 higher)  | ⊕⊕○○<br>LOW | CRITICAL |
| <b>Signs and symptoms/overall withdrawal syndrome (Patient health questionnaire-15 somatic symptoms) at 3 month follow up (Better indicated by lower values)</b>                   |                   |                      |                          |                         |              |      |    |    |   |                                            |             |          |
| 1                                                                                                                                                                                  | randomised trials | serious <sup>1</sup> | no serious inconsistency | no serious indirectness | <sup>2</sup> | none | 16 | 16 | - | MD 0.43 lower (3.33 lower to 2.47 higher)  | ⊕⊕○○<br>LOW | CRITICAL |
| <b>Signs and symptoms/overall withdrawal syndrome (opioid craving) post intervention (range of scores: 0-10; Better indicated by lower values)</b>                                 |                   |                      |                          |                         |              |      |    |    |   |                                            |             |          |

|                                                                                                                                                       |                   |                      |                          |                         |              |      |    |    |   |                                            |             |          |
|-------------------------------------------------------------------------------------------------------------------------------------------------------|-------------------|----------------------|--------------------------|-------------------------|--------------|------|----|----|---|--------------------------------------------|-------------|----------|
| 1                                                                                                                                                     | randomised trials | serious <sup>1</sup> | no serious inconsistency | no serious indirectness | <sup>2</sup> | none | 16 | 16 | - | MD 0.36 lower (2.42 lower to 1.7 higher)   | ⊕⊕○○<br>LOW | CRITICAL |
| <b>Signs and symptoms/overall withdrawal syndrome (opioid craving) at 3 month follow up (range of scores: 0-10; Better indicated by lower values)</b> |                   |                      |                          |                         |              |      |    |    |   |                                            |             |          |
| 1                                                                                                                                                     | randomised trials | serious <sup>1</sup> | no serious inconsistency | no serious indirectness | <sup>2</sup> | none | 16 | 16 | - | MD 0.46 lower (1.93 lower to 1.01 higher)  | ⊕⊕○○<br>LOW | CRITICAL |
| <b>Rates of lapse/relapse (Prescription opioid misuse index) post intervention (Better indicated by lower values)</b>                                 |                   |                      |                          |                         |              |      |    |    |   |                                            |             |          |
| 1                                                                                                                                                     | randomised trials | serious <sup>1</sup> | no serious inconsistency | no serious indirectness | <sup>2</sup> | none | 16 | 16 | - | MD 0.08 higher (0.58 lower to 0.74 higher) | ⊕⊕○○<br>LOW | CRITICAL |
| <b>Rates of lapse/relapse (Prescription opioid misuse index) at 3 month follow up (Better indicated by lower values)</b>                              |                   |                      |                          |                         |              |      |    |    |   |                                            |             |          |
| 1                                                                                                                                                     | randomised trials | serious <sup>1</sup> | no serious inconsistency | no serious indirectness | <sup>2</sup> | none | 16 | 16 | - | MD 0.06 higher (0.45 lower to 0.57 higher) | ⊕⊕○○<br>LOW | CRITICAL |

<sup>1</sup> Downgraded by 1 increment if the majority of the evidence was at high risk of bias, and downgraded by 2 increments if the majority of the evidence was at very high risk of bias

<sup>2</sup> Insufficient detail to assess imprecision

<sup>3</sup> Downgraded by 1 increment if the confidence interval crossed one MID or by 2 increments if the confidence interval crossed both MIDs

**Table 100: Evidence profile: Alternatives to prescribing (internet pain management program) versus Usual care (waiting list)**

| Quality assessment                                                                               |                   |                           |                          |                         |                           |                      | No of patients                                                                                  |         | Effect                  |                                                | Quality          | Importance |
|--------------------------------------------------------------------------------------------------|-------------------|---------------------------|--------------------------|-------------------------|---------------------------|----------------------|-------------------------------------------------------------------------------------------------|---------|-------------------------|------------------------------------------------|------------------|------------|
| No of studies                                                                                    | Design            | Risk of bias              | Inconsistency            | Indirectness            | Imprecision               | Other considerations | Alternatives to prescribing (internet pain management program) versus Usual care (waiting list) | Control | Relative (95% CI)       | Absolute                                       |                  |            |
| <b>Reduction/cessation in prescribed drug use (number of people decreasing/stopping opioids)</b> |                   |                           |                          |                         |                           |                      |                                                                                                 |         |                         |                                                |                  |            |
| 1                                                                                                | randomised trials | very serious <sup>1</sup> | no serious inconsistency | no serious indirectness | serious <sup>2</sup>      | none                 | 9/43 (20.9%)                                                                                    | 6.8%    | RR 3.07 (0.89 to 10.58) | 141 more per 1000 (from 7 fewer to 651 more)   | ⊕○○○<br>VERY LOW | CRITICAL   |
| <b>Reduction/cessation in prescribed drug use (number increasing opioids)</b>                    |                   |                           |                          |                         |                           |                      |                                                                                                 |         |                         |                                                |                  |            |
| 1                                                                                                | randomised trials | very serious <sup>1</sup> | no serious inconsistency | no serious indirectness | very serious <sup>2</sup> | none                 | 7/43 (16.3%)                                                                                    | 19.2%   | RR 0.85 (0.35 to 2.08)  | 29 fewer per 1000 (from 125 fewer to 207 more) | ⊕○○○<br>VERY LOW | CRITICAL   |

| Reduction/cessation in prescribed drug use (number adding/increasing an antidepressant)                                                             |                   |                           |                          |                         |                           |      |              |     |                        |                                               |               |          |
|-----------------------------------------------------------------------------------------------------------------------------------------------------|-------------------|---------------------------|--------------------------|-------------------------|---------------------------|------|--------------|-----|------------------------|-----------------------------------------------|---------------|----------|
| 1                                                                                                                                                   | randomised trials | very serious <sup>1</sup> | no serious inconsistency | no serious indirectness | very serious <sup>2</sup> | none | 8/26 (30.8%) | 18% | RR 1.71 (0.71 to 4.15) | 128 more per 1000 (from 52 fewer to 567 more) | ⊕○○○ VERY LOW | CRITICAL |
| Quality of life - psychological (pain interference) (measured with: Brief pain inventory ; range of scores: 0-10; Better indicated by lower values) |                   |                           |                          |                         |                           |      |              |     |                        |                                               |               |          |
| 1                                                                                                                                                   | randomised trials | very serious <sup>1</sup> | no serious inconsistency | no serious indirectness | serious <sup>2</sup>      | none | 45           | 47  | -                      | MD 0.2 lower (1.22 lower to 0.82 higher)      | ⊕○○○ VERY LOW | CRITICAL |
| Quality of life - psychological (pain self-efficacy) (range of scores: 0-60; Better indicated by higher values)                                     |                   |                           |                          |                         |                           |      |              |     |                        |                                               |               |          |
| 1                                                                                                                                                   | randomised trials | very serious <sup>1</sup> | no serious inconsistency | no serious indirectness | serious <sup>2</sup>      | none | 45           | 47  | -                      | MD 6.1 higher (0.73 to 11.47 higher)          | ⊕○○○ VERY LOW | CRITICAL |
| Rates of lapse/relapse (Current opioid misuse measure) (Better indicated by lower values)                                                           |                   |                           |                          |                         |                           |      |              |     |                        |                                               |               |          |
| 1                                                                                                                                                   | randomised trials | very serious <sup>1</sup> | no serious inconsistency | no serious indirectness | no serious imprecision    | none | 45           | 47  | -                      | MD 0.4 lower (3.12 lower to 2.32 higher)      | ⊕⊕○○ LOW      | CRITICAL |

<sup>1</sup> Downgraded by 1 increment if the majority of the evidence was at high risk of bias, and downgraded by 2 increments if the majority of the evidence was at very high risk of bias

<sup>2</sup> Downgraded by 1 increment if the confidence interval crossed one MID or by 2 increments if the confidence interval crossed both MIDs

### 1.3.2 Benzodiazepines

**Table 101: Evidence profile: Managed withdrawal (Melatonin + taper) versus Managed withdrawal (Placebo + taper)**

| Quality assessment                                                                                                                                                        |                   |                      |                          |                      |                      |                      | No of patients                                                                     |         | Effect            |                                    | Quality       | Importance |
|---------------------------------------------------------------------------------------------------------------------------------------------------------------------------|-------------------|----------------------|--------------------------|----------------------|----------------------|----------------------|------------------------------------------------------------------------------------|---------|-------------------|------------------------------------|---------------|------------|
| No of studies                                                                                                                                                             | Design            | Risk of bias         | Inconsistency            | Indirectness         | Imprecision          | Other considerations | Managed withdrawal (Melatonin + taper) versus Managed withdrawal (Placebo + taper) | Control | Relative (95% CI) | Absolute                           |               |            |
| Quality of life - psychological (sleep quality) (measured with: Northside Hospital Sleep Medicine Institute Test; range of scores: 0-8; Better indicated by lower values) |                   |                      |                          |                      |                      |                      |                                                                                    |         |                   |                                    |               |            |
| 1                                                                                                                                                                         | randomised trials | serious <sup>1</sup> | no serious inconsistency | serious <sup>2</sup> | serious <sup>3</sup> | none                 | 18                                                                                 | 18      | -                 | MD 1.66 lower (3.01 to 0.31 lower) | ⊕○○○ VERY LOW | CRITICAL   |



| Cessation of medication (discontinuation of hypnotic drug)                                                                            |                   |                      |                          |                      |                        |      |               |      |                       |                                               |               |          |
|---------------------------------------------------------------------------------------------------------------------------------------|-------------------|----------------------|--------------------------|----------------------|------------------------|------|---------------|------|-----------------------|-----------------------------------------------|---------------|----------|
| 1                                                                                                                                     | randomised trials | serious <sup>1</sup> | no serious inconsistency | serious <sup>2</sup> | no serious imprecision | none | 10/14 (71.4%) | 7.1% | RR 10 (1.47 to 68.04) | 639 more per 1000 (from 33 more to 1000 more) | ⊕⊕⊕⊕ LOW      | CRITICAL |
| Signs and symptoms/overall withdrawal syndrome (Geriatric Depression Scale) (range of scores: 1-30; Better indicated by lower values) |                   |                      |                          |                      |                        |      |               |      |                       |                                               |               |          |
| 1                                                                                                                                     | randomised trials | serious <sup>1</sup> | no serious inconsistency | serious <sup>2</sup> | serious <sup>3</sup>   | none | 18            | 18   | -                     | MD 1.45 lower (4.65 lower to 1.75 higher)     | ⊕⊕⊕⊕ VERY LOW | CRITICAL |
| Signs and symptoms/overall withdrawal syndrome (Goldberg Anxiety Scale) (range of scores: 0-9; Better indicated by lower values)      |                   |                      |                          |                      |                        |      |               |      |                       |                                               |               |          |
| 1                                                                                                                                     | randomised trials | serious <sup>1</sup> | no serious inconsistency | serious <sup>2</sup> | serious <sup>3</sup>   | none | 18            | 18   | -                     | MD 1 lower (2.47 lower to 0.47 higher)        | ⊕⊕⊕⊕ VERY LOW | CRITICAL |

<sup>1</sup> Downgraded by 1 increment if the majority of the evidence was at high risk of bias, and downgraded by 2 increments if the majority of the evidence was at very high risk of bias

<sup>2</sup> Downgraded by 1 or 2 increments because the majority of the evidence included an indirect population (downgrade by one increment) or a very indirect population (downgrade by two increments)

<sup>3</sup> Downgraded by 1 increment if the confidence interval crossed one MID or by 2 increments if the confidence interval crossed both MIDs

**Table 102: Evidence profile: Managed withdrawal (Melatonin+taper+support) versus Managed withdrawal (placebo+taper+support)**

| Quality assessment                                                            |                   |                         |                          |                         |                           |                      | No of patients                                                                                 |         | Effect                 |                                                | Quality       | Importance |
|-------------------------------------------------------------------------------|-------------------|-------------------------|--------------------------|-------------------------|---------------------------|----------------------|------------------------------------------------------------------------------------------------|---------|------------------------|------------------------------------------------|---------------|------------|
| No of studies                                                                 | Design            | Risk of bias            | Inconsistency            | Indirectness            | Imprecision               | Other considerations | Managed withdrawal (Melatonin+taper+support) versus Managed withdrawal (placebo+taper+support) | Control | Relative (95% CI)      | Absolute                                       |               |            |
| Cessation of medication (total benzodiazepine withdrawal) post intervention   |                   |                         |                          |                         |                           |                      |                                                                                                |         |                        |                                                |               |            |
| 1                                                                             | randomised trials | no serious risk of bias | no serious inconsistency | no serious indirectness | serious <sup>1</sup>      | none                 | 36/45 (80%)                                                                                    | 91.1%   | RR 0.88 (0.74 to 1.04) | 109 fewer per 1000 (from 237 fewer to 36 more) | ⊕⊕⊕⊕ MODERATE | CRITICAL   |
| Cessation of medication (total benzodiazepine withdrawal) at 3 year follow up |                   |                         |                          |                         |                           |                      |                                                                                                |         |                        |                                                |               |            |
| 1                                                                             | randomised trials | no serious              | no serious inconsistency | no serious indirectness | very serious <sup>1</sup> | none                 | 12/42 (28.6%)                                                                                  | 34.2%   | RR 0.84 (0.44 to 1.59) | 55 fewer per 1000 (from 192)                   | ⊕⊕⊕⊕ LOW      | CRITICAL   |

|  |  |              |  |  |  |  |  |  |  |                    |  |  |
|--|--|--------------|--|--|--|--|--|--|--|--------------------|--|--|
|  |  | risk of bias |  |  |  |  |  |  |  | fewer to 202 more) |  |  |
|--|--|--------------|--|--|--|--|--|--|--|--------------------|--|--|

<sup>1</sup> Downgraded by 1 increment if the confidence interval crossed one MID or by 2 increments if the confidence interval crossed both MIDs

**Table 103: Evidence profile: Patient advice and support (CBT + group therapy + taper) versus Patient advice and support (group therapy + taper only)**

| Quality assessment                                                                                                                                        |                   |                           |                          |                      |                           |                      | No of patients                                                                                                          |         | Effect                 |                                                | Quality          | Importance |
|-----------------------------------------------------------------------------------------------------------------------------------------------------------|-------------------|---------------------------|--------------------------|----------------------|---------------------------|----------------------|-------------------------------------------------------------------------------------------------------------------------|---------|------------------------|------------------------------------------------|------------------|------------|
| No of studies                                                                                                                                             | Design            | Risk of bias              | Inconsistency            | Indirectness         | Imprecision               | Other considerations | Patient advice and support (CBT + group therapy + taper) versus Patient advice and support (group therapy + taper only) | Control | Relative (95% CI)      | Absolute                                       |                  |            |
| <b>Cessation of medication (cessation of benzodiazepine use)</b>                                                                                          |                   |                           |                          |                      |                           |                      |                                                                                                                         |         |                        |                                                |                  |            |
| 1                                                                                                                                                         | randomised trials | very serious <sup>1</sup> | no serious inconsistency | serious <sup>2</sup> | very serious <sup>3</sup> | none                 | 15/18 (83.3%)                                                                                                           | 84.6%   | RR 0.98 (0.72 to 1.34) | 17 fewer per 1000 (from 237 fewer to 288 more) | ⊕○○○<br>VERY LOW | CRITICAL   |
| <b>Rates of lapse/relapse (Relapse to benzodiazepine use) at 11 month follow up</b>                                                                       |                   |                           |                          |                      |                           |                      |                                                                                                                         |         |                        |                                                |                  |            |
| 1                                                                                                                                                         | randomised trials | very serious <sup>1</sup> | no serious inconsistency | serious <sup>2</sup> | very serious <sup>3</sup> | none                 | 1/10 (10%)                                                                                                              | 10%     | RR 1 (0.07 to 13.87)   | 0 fewer per 1000 (from 93 fewer to 1000 more)  | ⊕○○○<br>VERY LOW | CRITICAL   |
| <b>Signs and symptoms/overall withdrawal syndrome (number of withdrawal symptoms) post intervention (Better indicated by lower values)</b>                |                   |                           |                          |                      |                           |                      |                                                                                                                         |         |                        |                                                |                  |            |
| 1                                                                                                                                                         | randomised trials | very serious <sup>1</sup> | no serious inconsistency | serious <sup>2</sup> | very serious <sup>3</sup> | none                 | 14                                                                                                                      | 12      | -                      | MD 1.07 lower (4.38 lower to 2.24 higher)      | ⊕○○○<br>VERY LOW | CRITICAL   |
| <b>Signs and symptoms/overall withdrawal syndrome (number of withdrawal symptoms) at 3 month follow up (Better indicated by lower values)</b>             |                   |                           |                          |                      |                           |                      |                                                                                                                         |         |                        |                                                |                  |            |
| 1                                                                                                                                                         | randomised trials | very serious <sup>1</sup> | no serious inconsistency | serious <sup>2</sup> | very serious <sup>3</sup> | none                 | 11                                                                                                                      | 10      | -                      | MD 0.45 higher (3.25 lower to 4.15 higher)     | ⊕○○○<br>VERY LOW | CRITICAL   |
| <b>Quality of life - psychological (Psychological Distress Inventory) post intervention (range of scores: 0-100; Better indicated by lower values)</b>    |                   |                           |                          |                      |                           |                      |                                                                                                                         |         |                        |                                                |                  |            |
| 1                                                                                                                                                         | randomised trials | very serious <sup>1</sup> | no serious inconsistency | serious <sup>2</sup> | very serious <sup>3</sup> | none                 | 14                                                                                                                      | 12      | -                      | MD 3.07 higher (5.07 lower to 11.21 higher)    | ⊕○○○<br>VERY LOW | CRITICAL   |
| <b>Quality of life - psychological (Psychological Distress Inventory) at 3 month follow up (range of scores: 0-100; Better indicated by lower values)</b> |                   |                           |                          |                      |                           |                      |                                                                                                                         |         |                        |                                                |                  |            |

|                                                                                                                                                  |                   |                           |                          |                      |                           |      |    |    |   |                                            |               |          |
|--------------------------------------------------------------------------------------------------------------------------------------------------|-------------------|---------------------------|--------------------------|----------------------|---------------------------|------|----|----|---|--------------------------------------------|---------------|----------|
| 1                                                                                                                                                | randomised trials | very serious <sup>1</sup> | no serious inconsistency | serious <sup>2</sup> | serious <sup>3</sup>      | none | 11 | 10 | - | MD 9.96 lower (20.85 lower to 0.93 higher) | ⊕○○○ VERY LOW | CRITICAL |
| <b>Quality of life (Systematic Quality of Life Inventory - current state sub scale) at 3 month follow up (Better indicated by higher values)</b> |                   |                           |                          |                      |                           |      |    |    |   |                                            |               |          |
| 1                                                                                                                                                | randomised trials | very serious <sup>1</sup> | no serious inconsistency | serious <sup>2</sup> | very serious <sup>3</sup> | none | 11 | 10 | - | MD 0.05 higher (1.15 lower to 1.25 higher) | ⊕○○○ VERY LOW | CRITICAL |

<sup>1</sup> Downgraded by 1 increment if the majority of the evidence was at high risk of bias, and downgraded by 2 increments if the majority of the evidence was at very high risk of bias

<sup>2</sup> Downgraded by 1 or 2 increments because the majority of the evidence included an indirect population (downgrade by one increment) or a very indirect population (downgrade by two increments)

<sup>3</sup> Downgraded by 1 increment if the confidence interval crossed one MID or by 2 increments if the confidence interval crossed both MIDs

**Table 104: Evidence profile: Patient education (booklet) versus Usual care (waiting list)**

| Quality assessment                                                                                                        |                   |                      |                          |                      |                        |                      | No of patients                                               |         | Effect                  |                                               | Quality  | Importance |
|---------------------------------------------------------------------------------------------------------------------------|-------------------|----------------------|--------------------------|----------------------|------------------------|----------------------|--------------------------------------------------------------|---------|-------------------------|-----------------------------------------------|----------|------------|
| No of studies                                                                                                             | Design            | Risk of bias         | Inconsistency            | Indirectness         | Imprecision            | Other considerations | Patient education (booklet) versus Usual care (waiting list) | Control | Relative (95% CI)       | Absolute                                      |          |            |
| <b>Cessation of medication (follow-up 6 months)</b>                                                                       |                   |                      |                          |                      |                        |                      |                                                              |         |                         |                                               |          |            |
| 1                                                                                                                         | randomised trials | serious <sup>1</sup> | no serious inconsistency | serious <sup>2</sup> | no serious imprecision | none                 | 38/123 (30.9%)                                               | 5.1%    | OR 8.1 (3.34 to 19.64)  | 252 more per 1000 (from 101 more to 462 more) | ⊕⊕○○ LOW | CRITICAL   |
| <b>Reduction/cessation in prescribed drug use (complete cessation plus benzodiazepine reduction) (follow-up 6 months)</b> |                   |                      |                          |                      |                        |                      |                                                              |         |                         |                                               |          |            |
| 1                                                                                                                         | randomised trials | serious <sup>1</sup> | no serious inconsistency | serious <sup>2</sup> | no serious imprecision | none                 | 54/123 (43.9%)                                               | 11.60%  | OR 6.73 (3.12 to 14.52) | 353 more per 1000 (from 174 more to 540 more) | ⊕⊕○○ LOW | CRITICAL   |

<sup>1</sup> Downgraded by 1 increment if the majority of the evidence was at high risk of bias, and downgraded by 2 increments if the majority of the evidence was at very high risk of bias

<sup>2</sup> Downgraded by 1 or 2 increments because the majority of the evidence included an indirect population (downgrade by one increment) or a very indirect population (downgrade by two increments)

**Table 105: Evidence profile: Patient advice and support (single tailored letter) versus Usual care (standard GP letter)**

| Quality assessment                                   |                   |                           |                          |                         |                      |                      | No of patients                                                                             |         | Effect                |          | Quality          | Importance |
|------------------------------------------------------|-------------------|---------------------------|--------------------------|-------------------------|----------------------|----------------------|--------------------------------------------------------------------------------------------|---------|-----------------------|----------|------------------|------------|
| No of studies                                        | Design            | Risk of bias              | Inconsistency            | Indirectness            | Imprecision          | Other considerations | Patient advice and support (single tailored letter) versus Usual care (standard GP letter) | Control | Relative (95% CI)     | Absolute |                  |            |
| <b>Cessation of medication (follow-up 12 months)</b> |                   |                           |                          |                         |                      |                      |                                                                                            |         |                       |          |                  |            |
| 1                                                    | randomised trials | very serious <sup>1</sup> | no serious inconsistency | no serious indirectness | serious <sup>2</sup> | none                 | -                                                                                          | 0%      | OR 2.3 (1.21 to 4.37) | -        | ⊕000<br>VERY LOW | CRITICAL   |

<sup>1</sup> Downgraded by 1 increment if the majority of the evidence was at high risk of bias, and downgraded by 2 increments if the majority of the evidence was at very high risk of bias

<sup>2</sup> Downgraded by 1 increment if the confidence interval crossed one MID or by 2 increments if the confidence interval crossed both MIDs

**Table 106: Evidence profile: Patient advice and support (multiple tailored letters) versus Usual care (standard GP letter)**

| Quality assessment                                   |                   |                           |                          |                         |                      |                      | No of patients                                                                                |         | Effect                |          | Quality          | Importance |
|------------------------------------------------------|-------------------|---------------------------|--------------------------|-------------------------|----------------------|----------------------|-----------------------------------------------------------------------------------------------|---------|-----------------------|----------|------------------|------------|
| No of studies                                        | Design            | Risk of bias              | Inconsistency            | Indirectness            | Imprecision          | Other considerations | Patient advice and support (multiple tailored letters) versus Usual care (standard GP letter) | Control | Relative (95% CI)     | Absolute |                  |            |
| <b>Cessation of medication (follow-up 12 months)</b> |                   |                           |                          |                         |                      |                      |                                                                                               |         |                       |          |                  |            |
| 1                                                    | randomised trials | very serious <sup>1</sup> | no serious inconsistency | no serious indirectness | serious <sup>2</sup> | none                 | -                                                                                             | 0%      | OR 2.1 (1.11 to 3.97) | -        | ⊕000<br>VERY LOW | CRITICAL   |

<sup>1</sup> Downgraded by 1 increment if the majority of the evidence was at high risk of bias, and downgraded by 2 increments if the majority of the evidence was at very high risk of bias

<sup>2</sup> Downgraded by 1 increment if the confidence interval crossed one MID or by 2 increments if the confidence interval crossed both MIDs

**Table 107: Evidence profile: Prescriber education/skills/knowledge/support (education manual + educational meeting + coach) versus Prescriber education/skills/knowledge/support (education manual only)**

| Quality assessment                                                                                                                      |                   |                           |                          |                      |                        |                      | No of patients                                                                                                                                                              |         | Effect                 |                                            | Quality          | Importance |
|-----------------------------------------------------------------------------------------------------------------------------------------|-------------------|---------------------------|--------------------------|----------------------|------------------------|----------------------|-----------------------------------------------------------------------------------------------------------------------------------------------------------------------------|---------|------------------------|--------------------------------------------|------------------|------------|
| No of studies                                                                                                                           | Design            | Risk of bias              | Inconsistency            | Indirectness         | Imprecision            | Other considerations | Prescriber education/skills/knowledge/support (education manual + educational meeting + coach) versus Prescriber education/skills/knowledge/support (education manual only) | Control | Relative (95% CI)      | Absolute                                   |                  |            |
| <b>Cessation of medication (complete benzodiazepine discontinuation) 0-3 months post discontinuation letter</b>                         |                   |                           |                          |                      |                        |                      |                                                                                                                                                                             |         |                        |                                            |                  |            |
| 1                                                                                                                                       | randomised trials | very serious <sup>1</sup> | no serious inconsistency | serious <sup>2</sup> | no serious imprecision | none                 | 998/11423 (8.7%)                                                                                                                                                            | 8.3%    | RR 1.06 (0.96 to 1.16) | 5 more per 1000 (from 3 fewer to 13 more)  | ⊕○○○<br>VERY LOW | CRITICAL   |
| <b>Cessation of medication (complete benzodiazepine discontinuation) 4-6 months post discontinuation letter</b>                         |                   |                           |                          |                      |                        |                      |                                                                                                                                                                             |         |                        |                                            |                  |            |
| 1                                                                                                                                       | randomised trials | very serious <sup>1</sup> | no serious inconsistency | serious <sup>2</sup> | no serious imprecision | none                 | 1129/11423 (9.9%)                                                                                                                                                           | 10.2%   | RR 0.97 (0.89 to 1.06) | 3 fewer per 1000 (from 11 fewer to 6 more) | ⊕○○○<br>VERY LOW | CRITICAL   |
| <b>Reduction/cessation in prescribed drug use (at least 50% reduction in benzodiazepine use) 0-3 months post discontinuation letter</b> |                   |                           |                          |                      |                        |                      |                                                                                                                                                                             |         |                        |                                            |                  |            |
| 1                                                                                                                                       | randomised trials | very serious <sup>1</sup> | no serious inconsistency | serious <sup>2</sup> | no serious imprecision | none                 | 1793/11423 (15.7%)                                                                                                                                                          | 14.8%   | RR 1.06 (0.99 to 1.14) | 9 more per 1000 (from 1 fewer to 21 more)  | ⊕○○○<br>VERY LOW | CRITICAL   |
| <b>Reduction/cessation in prescribed drug use (at least 50% reduction in benzodiazepine use) 4-6 months post discontinuation letter</b> |                   |                           |                          |                      |                        |                      |                                                                                                                                                                             |         |                        |                                            |                  |            |
| 1                                                                                                                                       | randomised trials | very serious <sup>1</sup> | no serious inconsistency | serious <sup>2</sup> | no serious imprecision | none                 | 1820/11423 (15.9%)                                                                                                                                                          | 16.7%   | RR 0.95 (0.89 to 1.02) | 8 fewer per 1000 (from 18 fewer to 3 more) | ⊕○○○<br>VERY LOW | CRITICAL   |

<sup>1</sup> Downgraded by 1 increment if the majority of the evidence was at high risk of bias, and downgraded by 2 increments if the majority of the evidence was at very high risk of bias

<sup>2</sup> Downgraded by 1 or 2 increments because the majority of the evidence included an indirect population (downgrade by one increment) or a very indirect population (downgrade by two increments)



|                                                                                                                              |                   |                      |                          |                         |                           |      |                |       |                         |                                                |                       |          |  |
|------------------------------------------------------------------------------------------------------------------------------|-------------------|----------------------|--------------------------|-------------------------|---------------------------|------|----------------|-------|-------------------------|------------------------------------------------|-----------------------|----------|--|
|                                                                                                                              |                   |                      |                          |                         |                           |      |                |       |                         |                                                | 19 fewer to 165 more) |          |  |
| <b>Signs and symptoms/overall withdrawal syndrome (mild/moderate/severe withdrawal symptoms) at 6 months - Irritability</b>  |                   |                      |                          |                         |                           |      |                |       |                         |                                                |                       |          |  |
| 1                                                                                                                            | randomised trials | serious <sup>1</sup> | no serious inconsistency | no serious indirectness | serious <sup>2</sup>      | none | 42/186 (22.6%) | 26.4% | RR 0.85 (0.59 to 1.24)  | 40 fewer per 1000 (from 108 fewer to 63 more)  | ⊕⊕⊕⊕ LOW              | CRITICAL |  |
| <b>Signs and symptoms/overall withdrawal syndrome (mild/moderate/severe withdrawal symptoms) at 6 months - Insomnia</b>      |                   |                      |                          |                         |                           |      |                |       |                         |                                                |                       |          |  |
| 1                                                                                                                            | randomised trials | serious <sup>1</sup> | no serious inconsistency | no serious indirectness | serious <sup>2</sup>      | none | 87/186 (46.8%) | 52.2% | RR 0.9 (0.72 to 1.11)   | 52 fewer per 1000 (from 146 fewer to 57 more)  | ⊕⊕⊕⊕ LOW              | CRITICAL |  |
| <b>Signs and symptoms/overall withdrawal syndrome (mild/moderate/severe withdrawal symptoms) at 6 months - Anxiety</b>       |                   |                      |                          |                         |                           |      |                |       |                         |                                                |                       |          |  |
| 1                                                                                                                            | randomised trials | serious <sup>1</sup> | no serious inconsistency | no serious indirectness | serious <sup>2</sup>      | none | 72/186 (38.7%) | 40.3% | RR 0.96 (0.74 to 1.25)  | 16 fewer per 1000 (from 105 fewer to 101 more) | ⊕⊕⊕⊕ LOW              | CRITICAL |  |
| <b>Signs and symptoms/overall withdrawal syndrome (mild/moderate/severe withdrawal symptoms) at 6 months - Convulsions</b>   |                   |                      |                          |                         |                           |      |                |       |                         |                                                |                       |          |  |
| 1                                                                                                                            | randomised trials | serious <sup>1</sup> | no serious inconsistency | no serious indirectness | very serious <sup>2</sup> | none | 3/186 (1.6%)   | 0.6%  | RR 2.56 (0.27 to 24.41) | 9 more per 1000 (from 4 fewer to 140 more)     | ⊕⊕⊕⊕ VERY LOW         | CRITICAL |  |
| <b>Signs and symptoms/overall withdrawal syndrome (mild/moderate/severe withdrawal symptoms) at 12 months - Tremor</b>       |                   |                      |                          |                         |                           |      |                |       |                         |                                                |                       |          |  |
| 1                                                                                                                            | randomised trials | serious <sup>1</sup> | no serious inconsistency | no serious indirectness | very serious <sup>2</sup> | none | 13/184 (7.1%)  | 6.9%  | RR 1.02 (0.47 to 2.22)  | 1 more per 1000 (from 37 fewer to 84 more)     | ⊕⊕⊕⊕ VERY LOW         | CRITICAL |  |
| <b>Signs and symptoms/overall withdrawal syndrome (mild/moderate/severe withdrawal symptoms) at 12 months - Irritability</b> |                   |                      |                          |                         |                           |      |                |       |                         |                                                |                       |          |  |
| 1                                                                                                                            | randomised trials | serious <sup>1</sup> | no serious inconsistency | no serious indirectness | very serious <sup>2</sup> | none | 26/184 (14.1%) | 14.5% | RR 0.98 (0.58 to 1.64)  | 3 fewer per 1000 (from 61 fewer to 93 more)    | ⊕⊕⊕⊕ VERY LOW         | CRITICAL |  |
| <b>Signs and symptoms/overall withdrawal syndrome (mild/moderate/severe withdrawal symptoms) at 12 months - Insomnia</b>     |                   |                      |                          |                         |                           |      |                |       |                         |                                                |                       |          |  |



|                                                                                                                             |                   |                      |                          |                         |                        |      |                   |       |                           |                                               |                  |          |
|-----------------------------------------------------------------------------------------------------------------------------|-------------------|----------------------|--------------------------|-------------------------|------------------------|------|-------------------|-------|---------------------------|-----------------------------------------------|------------------|----------|
| 1                                                                                                                           | randomised trials | serious <sup>1</sup> | no serious inconsistency | no serious indirectness | serious <sup>2</sup>   | none | 66/159<br>(41.5%) | 33.3% | RR 1.25<br>(0.93 to 1.66) | 83 more per 1000 (from 23 fewer to 220 more)  | ⊕⊕○○<br>LOW      | CRITICAL |
| <b>Signs and symptoms/overall withdrawal syndrome (mild/moderate/severe withdrawal symptoms) at 12 months - Anxiety</b>     |                   |                      |                          |                         |                        |      |                   |       |                           |                                               |                  |          |
| 1                                                                                                                           | randomised trials | serious <sup>1</sup> | no serious inconsistency | no serious indirectness | serious <sup>2</sup>   | none | 48/184<br>(26.1%) | 29.6% | RR 0.88<br>(0.63 to 1.24) | 36 fewer per 1000 (from 110 fewer to 71 more) | ⊕⊕○○<br>LOW      | CRITICAL |
| <b>Signs and symptoms/overall withdrawal syndrome (mild/moderate/severe withdrawal symptoms) at 12 months - Convulsions</b> |                   |                      |                          |                         |                        |      |                   |       |                           |                                               |                  |          |
| 1                                                                                                                           | randomised trials | serious <sup>1</sup> | no serious inconsistency | no serious indirectness | no serious imprecision | none | 0/184<br>(0%)     | 0%    | not pooled                | not pooled                                    | ⊕⊕⊕○<br>MODERATE | CRITICAL |
| <b>Rates of lapse/relapse (use of benzodiazepine at 36 months in those who stopped use at 12 months)</b>                    |                   |                      |                          |                         |                        |      |                   |       |                           |                                               |                  |          |
| 1                                                                                                                           | randomised trials | serious <sup>1</sup> | no serious inconsistency | no serious indirectness | serious <sup>2</sup>   | none | 22/86<br>(25.6%)  | 35.5% | RR 0.72<br>(0.45 to 1.15) | 99 fewer per 1000 (from 195 fewer to 53 more) | ⊕⊕○○<br>LOW      | CRITICAL |

<sup>1</sup> Downgraded by 1 increment if the majority of the evidence was at high risk of bias, and downgraded by 2 increments if the majority of the evidence was at very high risk of bias

<sup>2</sup> Downgraded by 1 increment if the confidence interval crossed one MID or by 2 increments if the confidence interval crossed both MIDs

Table 109: Evidence profile: Prescriber education/skills/knowledge/support (GP workshop + follow up) versus Usual care

| Quality assessment                                                                                                          |                   |                           |                          |                         |                        |                      | No of patients                                                                            |         | Effect                 |                                               | Quality       | Importance |
|-----------------------------------------------------------------------------------------------------------------------------|-------------------|---------------------------|--------------------------|-------------------------|------------------------|----------------------|-------------------------------------------------------------------------------------------|---------|------------------------|-----------------------------------------------|---------------|------------|
| No of studies                                                                                                               | Design            | Risk of bias              | Inconsistency            | Indirectness            | Imprecision            | Other considerations | Prescriber education/skills/knowledge/support (GP workshop + follow up) versus Usual care | Control | Relative (95% CI)      | Absolute                                      |               |            |
| <b>Cessation of medication (cessation of benzodiazepine use) post intervention</b>                                          |                   |                           |                          |                         |                        |                      |                                                                                           |         |                        |                                               |               |            |
| 1                                                                                                                           | randomised trials | serious <sup>1</sup>      | no serious inconsistency | no serious indirectness | no serious imprecision | none                 | 71/191 (37.2%)                                                                            | 14.5%   | RR 2.57 (1.71 to 3.86) | 228 more per 1000 (from 103 more to 415 more) | ⊕⊕⊕○ MODERATE | CRITICAL   |
| <b>Cessation of medication (cessation of benzodiazepine use) at 36 month follow up</b>                                      |                   |                           |                          |                         |                        |                      |                                                                                           |         |                        |                                               |               |            |
| 1                                                                                                                           | randomised trials | serious <sup>1</sup>      | no serious inconsistency | no serious indirectness | serious <sup>2</sup>   | none                 | 79/191 (41.4%)                                                                            | 26%     | RR 1.59 (1.17 to 2.15) | 153 more per 1000 (from 44 more to 299 more)  | ⊕⊕○○ LOW      | CRITICAL   |
| <b>Reduction/cessation of prescribed medication (initiation of antidepressant medication) at 12 months</b>                  |                   |                           |                          |                         |                        |                      |                                                                                           |         |                        |                                               |               |            |
| 1                                                                                                                           | randomised trials | serious <sup>1</sup>      | no serious inconsistency | no serious indirectness | serious <sup>2</sup>   | none                 | 39/187 (20.9%)                                                                            | 13.6%   | RR 1.53 (0.96 to 2.46) | 72 more per 1000 (from 5 fewer to 199 more)   | ⊕⊕○○ LOW      | CRITICAL   |
| <b>Signs and symptoms/overall withdrawal syndrome (attempted suicide by overdose) at 4 months</b>                           |                   |                           |                          |                         |                        |                      |                                                                                           |         |                        |                                               |               |            |
| 1                                                                                                                           | randomised trials | very serious <sup>1</sup> | no serious inconsistency | no serious indirectness | no serious imprecision | none                 | 0/191 (0%)                                                                                | 0%      | See comment            | -                                             | ⊕⊕○○ LOW      | CRITICAL   |
| <b>Signs and symptoms/overall withdrawal syndrome (mild/moderate/severe withdrawal symptoms) at 6 months - Tremor</b>       |                   |                           |                          |                         |                        |                      |                                                                                           |         |                        |                                               |               |            |
| 1                                                                                                                           | randomised trials | serious <sup>1</sup>      | no serious inconsistency | no serious indirectness | no serious imprecision | none                 | 30/186 (16.1%)                                                                            | 5.3%    | RR 3.05 (1.49 to 6.23) | 109 more per 1000 (from 26 more to 277 more)  | ⊕⊕⊕○ MODERATE | CRITICAL   |
| <b>Signs and symptoms/overall withdrawal syndrome (mild/moderate/severe withdrawal symptoms) at 6 months - Irritability</b> |                   |                           |                          |                         |                        |                      |                                                                                           |         |                        |                                               |               |            |

|                                                                                                                              |                   |                      |                          |                         |                           |      |                   |       |                            |                                               |                  |          |
|------------------------------------------------------------------------------------------------------------------------------|-------------------|----------------------|--------------------------|-------------------------|---------------------------|------|-------------------|-------|----------------------------|-----------------------------------------------|------------------|----------|
| 1                                                                                                                            | randomised trials | serious <sup>1</sup> | no serious inconsistency | no serious indirectness | no serious imprecision    | none | 42/186<br>(22.6%) | 8.8%  | RR 2.56<br>(1.47 to 4.44)  | 137 more per 1000 (from 41 more to 303 more)  | ⊕⊕⊕○<br>MODERATE | CRITICAL |
| <b>Signs and symptoms/overall withdrawal syndrome (mild/moderate/severe withdrawal symptoms) at 6 months - Insomnia</b>      |                   |                      |                          |                         |                           |      |                   |       |                            |                                               |                  |          |
| 1                                                                                                                            | randomised trials | serious <sup>1</sup> | no serious inconsistency | no serious indirectness | no serious imprecision    | none | 87/186<br>(46.8%) | 17.7% | RR 2.65<br>(1.85 to 3.8)   | 292 more per 1000 (from 150 more to 496 more) | ⊕⊕⊕○<br>MODERATE | CRITICAL |
| <b>Signs and symptoms/overall withdrawal syndrome (mild/moderate/severe withdrawal symptoms) at 6 months - Anxiety</b>       |                   |                      |                          |                         |                           |      |                   |       |                            |                                               |                  |          |
| 1                                                                                                                            | randomised trials | serious <sup>1</sup> | no serious inconsistency | no serious indirectness | no serious imprecision    | none | 72/186<br>(38.7%) | 12.4% | RR 3.13<br>(2.02 to 4.86)  | 264 more per 1000 (from 126 more to 479 more) | ⊕⊕⊕○<br>MODERATE | CRITICAL |
| <b>Signs and symptoms/overall withdrawal syndrome (mild/moderate/severe withdrawal symptoms) at 6 months - Convulsions</b>   |                   |                      |                          |                         |                           |      |                   |       |                            |                                               |                  |          |
| 1                                                                                                                            | randomised trials | serious <sup>1</sup> | no serious inconsistency | no serious indirectness | very serious <sup>2</sup> | none | 3/186<br>(1.6%)   | 0.6%  | RR 2.74<br>(0.29 to 26.11) | 10 more per 1000 (from 4 fewer to 151 more)   | ⊕○○○<br>VERY LOW | CRITICAL |
| <b>Signs and symptoms/overall withdrawal syndrome (mild/moderate/severe withdrawal symptoms) at 12 months - Tremor</b>       |                   |                      |                          |                         |                           |      |                   |       |                            |                                               |                  |          |
| 1                                                                                                                            | randomised trials | serious <sup>1</sup> | no serious inconsistency | no serious indirectness | very serious <sup>2</sup> | none | 13/184<br>(7.1%)  | 6.7%  | RR 1.05<br>(0.49 to 2.29)  | 3 more per 1000 (from 34 fewer to 86 more)    | ⊕○○○<br>VERY LOW | CRITICAL |
| <b>Signs and symptoms/overall withdrawal syndrome (mild/moderate/severe withdrawal symptoms) at 12 months - Irritability</b> |                   |                      |                          |                         |                           |      |                   |       |                            |                                               |                  |          |
| 1                                                                                                                            | randomised trials | serious <sup>1</sup> | no serious inconsistency | no serious indirectness | very serious <sup>2</sup> | none | 26/184<br>(14.1%) | 12.2% | RR 1.16<br>(0.67 to 2)     | 20 more per 1000 (from 40 fewer to 122 more)  | ⊕○○○<br>VERY LOW | CRITICAL |
| <b>Signs and symptoms/overall withdrawal syndrome (mild/moderate/severe withdrawal symptoms) at 12 months - Insomnia</b>     |                   |                      |                          |                         |                           |      |                   |       |                            |                                               |                  |          |
| 1                                                                                                                            | randomised trials | serious <sup>1</sup> | no serious inconsistency | no serious indirectness | serious <sup>2</sup>      | none | 66/159<br>(41.5%) | 28.7% | RR 1.45<br>(1.07 to 1.96)  | 129 more per 1000 (from 20 more to 276 more)  | ⊕⊕○○<br>LOW      | CRITICAL |

| Signs and symptoms/overall withdrawal syndrome (mild/moderate/severe withdrawal symptoms) at 12 months - Anxiety     |                   |                      |                          |                         |                           |      |                   |       |                           |                                                |                  |          |
|----------------------------------------------------------------------------------------------------------------------|-------------------|----------------------|--------------------------|-------------------------|---------------------------|------|-------------------|-------|---------------------------|------------------------------------------------|------------------|----------|
| 1                                                                                                                    | randomised trials | serious <sup>1</sup> | no serious inconsistency | no serious indirectness | serious <sup>2</sup>      | none | 48/184<br>(26.1%) | 20.1% | RR 1.3<br>(0.88 to 1.91)  | 60 more per 1000 (from 24 fewer to 183 more)   | ⊕⊕⊕⊕<br>LOW      | CRITICAL |
| Signs and symptoms/overall withdrawal syndrome (mild/moderate/severe withdrawal symptoms) at 12 months - Convulsions |                   |                      |                          |                         |                           |      |                   |       |                           |                                                |                  |          |
| 1                                                                                                                    | randomised trials | serious <sup>1</sup> | no serious inconsistency | no serious indirectness | no serious imprecision    | none | 0/184<br>(0%)     | 0%    | not pooled                | not pooled                                     | ⊕⊕⊕⊕<br>MODERATE | CRITICAL |
| Rates of lapse/relapse (benzodiazepine use at 36 months in those who stopped use at 12 months)                       |                   |                      |                          |                         |                           |      |                   |       |                           |                                                |                  |          |
| 1                                                                                                                    | randomised trials | serious <sup>1</sup> | no serious inconsistency | no serious indirectness | very serious <sup>2</sup> | none | 22/86<br>(25.6%)  | 30.8% | RR 0.83<br>(0.42 to 1.64) | 52 fewer per 1000 (from 179 fewer to 197 more) | ⊕⊕⊕⊕<br>VERY LOW | CRITICAL |

<sup>1</sup> Downgraded by 1 increment if the majority of the evidence was at high risk of bias, and downgraded by 2 increments if the majority of the evidence was at very high risk of bias

<sup>2</sup> Downgraded by 1 increment if the confidence interval crossed one MID or by 2 increments if the confidence interval crossed both MIDs

**Table 110: Evidence profile: Prescriber education/skills/knowledge/support (GP workshop + written instructions) versus Usual care**

| Quality assessment                                                              |                   |                      |                          |                         |                        |                      | No of patients                                                                                       |         |                           | Effect                                        |                  | Quality  | Importance |
|---------------------------------------------------------------------------------|-------------------|----------------------|--------------------------|-------------------------|------------------------|----------------------|------------------------------------------------------------------------------------------------------|---------|---------------------------|-----------------------------------------------|------------------|----------|------------|
| No of studies                                                                   | Design            | Risk of bias         | Inconsistency            | Indirectness            | Imprecision            | Other considerations | Prescriber education/skills/knowledge/support (GP workshop + written instructions) versus Usual care | Control | Relative (95% CI)         | Absolute                                      |                  |          |            |
| Cessation of medication (cessation of benzodiazepine use) post intervention     |                   |                      |                          |                         |                        |                      |                                                                                                      |         |                           |                                               |                  |          |            |
| 1                                                                               | randomised trials | serious <sup>1</sup> | no serious inconsistency | no serious indirectness | no serious imprecision | none                 | 72/168<br>(42.9%)                                                                                    | 14.5%   | RR 2.97<br>(1.98 to 4.44) | 286 more per 1000 (from 142 more to 499 more) | ⊕⊕⊕⊕<br>MODERATE | CRITICAL |            |
| Cessation of medication (cessation of benzodiazepine use) at 36 month follow up |                   |                      |                          |                         |                        |                      |                                                                                                      |         |                           |                                               |                  |          |            |
| 1                                                                               | randomised trials | serious <sup>1</sup> | no serious inconsistency | no serious indirectness | serious <sup>2</sup>   | none                 | 66/168<br>(39.3%)                                                                                    | 26%     | RR 1.51<br>(1.1 to 2.07)  | 133 more per 1000 (from 26                    | ⊕⊕⊕⊕<br>LOW      | CRITICAL |            |

|                                                                                                                             |                   |                           |                          |                         |                           |      |                |       |                         |                                               |                  |          |
|-----------------------------------------------------------------------------------------------------------------------------|-------------------|---------------------------|--------------------------|-------------------------|---------------------------|------|----------------|-------|-------------------------|-----------------------------------------------|------------------|----------|
|                                                                                                                             |                   |                           |                          |                         |                           |      |                |       |                         | more to 278 more)                             |                  |          |
| <b>Reduction/cessation of prescribed medication (initiation of antidepressants) at 12 months</b>                            |                   |                           |                          |                         |                           |      |                |       |                         |                                               |                  |          |
| 1                                                                                                                           | randomised trials | serious <sup>1</sup>      | no serious inconsistency | no serious indirectness | very serious <sup>2</sup> | none | 20/161 (12.4%) | 13.6% | RR 0.91 (0.52 to 1.6)   | 12 fewer per 1000 (from 65 fewer to 82 more)  | ⊕○○○<br>VERY LOW | CRITICAL |
| <b>Signs and symptoms/overall withdrawal syndrome (attempted suicide by overdose) at 4 months</b>                           |                   |                           |                          |                         |                           |      |                |       |                         |                                               |                  |          |
| 1                                                                                                                           | randomised trials | very serious <sup>1</sup> | no serious inconsistency | no serious indirectness | very serious <sup>2</sup> | none | 1/168 (0.6%)   | 0%    | OR 7.61 (0.15 to 383.8) | -                                             | ⊕○○○<br>VERY LOW | CRITICAL |
| <b>Signs and symptoms/overall withdrawal syndrome (mild/moderate/severe withdrawal symptoms) at 6 months - Tremor</b>       |                   |                           |                          |                         |                           |      |                |       |                         |                                               |                  |          |
| 1                                                                                                                           | randomised trials | serious <sup>1</sup>      | no serious inconsistency | no serious indirectness | serious <sup>2</sup>      | none | 18/159 (11.3%) | 5.3%  | RR 2.14 (0.99 to 4.62)  | 60 more per 1000 (from 1 fewer to 192 more)   | ⊕⊕○○<br>LOW      | CRITICAL |
| <b>Signs and symptoms/overall withdrawal syndrome (mild/moderate/severe withdrawal symptoms) at 6 months - Irritability</b> |                   |                           |                          |                         |                           |      |                |       |                         |                                               |                  |          |
| 1                                                                                                                           | randomised trials | serious <sup>1</sup>      | no serious inconsistency | no serious indirectness | no serious imprecision    | none | 42/159 (26.4%) | 8.8%  | RR 2.99 (1.73 to 5.18)  | 175 more per 1000 (from 64 more to 368 more)  | ⊕⊕⊕○<br>MODERATE | CRITICAL |
| <b>Signs and symptoms/overall withdrawal syndrome (mild/moderate/severe withdrawal symptoms) at 6 months - Insomnia</b>     |                   |                           |                          |                         |                           |      |                |       |                         |                                               |                  |          |
| 1                                                                                                                           | randomised trials | serious <sup>1</sup>      | no serious inconsistency | no serious indirectness | no serious imprecision    | none | 83/159 (52.2%) | 17.7% | RR 2.96 (2.07 to 4.23)  | 347 more per 1000 (from 189 more to 572 more) | ⊕⊕⊕○<br>MODERATE | CRITICAL |
| <b>Signs and symptoms/overall withdrawal syndrome (mild/moderate/severe withdrawal symptoms) at 6 months - Anxiety</b>      |                   |                           |                          |                         |                           |      |                |       |                         |                                               |                  |          |
| 1                                                                                                                           | randomised trials | serious <sup>1</sup>      | no serious inconsistency | no serious indirectness | no serious imprecision    | none | 64/159 (40.3%) | 12.4% | RR 3.26 (2.09 to 5.07)  | 280 more per 1000 (from 135 more to 505 more) | ⊕⊕⊕○<br>MODERATE | CRITICAL |
| <b>Signs and symptoms/overall withdrawal syndrome (mild/moderate/severe withdrawal symptoms) at 6 months - Convulsions</b>  |                   |                           |                          |                         |                           |      |                |       |                         |                                               |                  |          |

|                                                                                                                              |                   |                      |                          |                         |                           |      |                   |       |                            |                                               |                  |          |
|------------------------------------------------------------------------------------------------------------------------------|-------------------|----------------------|--------------------------|-------------------------|---------------------------|------|-------------------|-------|----------------------------|-----------------------------------------------|------------------|----------|
| 1                                                                                                                            | randomised trials | serious <sup>1</sup> | no serious inconsistency | no serious indirectness | very serious <sup>2</sup> | none | 1/159<br>(0.63%)  | 0.6%  | RR 1.07<br>(0.07 to 16.95) | 0 more per 1000 (from 6 fewer to 96 more)     | ⊕○○○<br>VERY LOW | CRITICAL |
| <b>Signs and symptoms/overall withdrawal syndrome (mild/moderate/severe withdrawal symptoms) at 12 months - Tremor</b>       |                   |                      |                          |                         |                           |      |                   |       |                            |                                               |                  |          |
| 1                                                                                                                            | randomised trials | serious <sup>1</sup> | no serious inconsistency | no serious indirectness | very serious <sup>2</sup> | none | 11/159<br>(6.9%)  | 6.7%  | RR 1.03<br>(0.46 to 2.31)  | 2 more per 1000 (from 36 fewer to 88 more)    | ⊕○○○<br>VERY LOW | CRITICAL |
| <b>Signs and symptoms/overall withdrawal syndrome (mild/moderate/severe withdrawal symptoms) at 12 months - Irritability</b> |                   |                      |                          |                         |                           |      |                   |       |                            |                                               |                  |          |
| 1                                                                                                                            | randomised trials | serious <sup>1</sup> | no serious inconsistency | no serious indirectness | very serious <sup>2</sup> | none | 23/159<br>(14.5%) | 12.2% | RR 1.19<br>(0.68 to 2.07)  | 23 more per 1000 (from 39 fewer to 131 more)  | ⊕○○○<br>VERY LOW | CRITICAL |
| <b>Signs and symptoms/overall withdrawal syndrome (mild/moderate/severe withdrawal symptoms) at 12 months - Insomnia</b>     |                   |                      |                          |                         |                           |      |                   |       |                            |                                               |                  |          |
| 1                                                                                                                            | randomised trials | serious <sup>1</sup> | no serious inconsistency | no serious indirectness | serious <sup>2</sup>      | none | 53/159<br>(33.3%) | 28.7% | RR 1.16<br>(0.84 to 1.61)  | 46 more per 1000 (from 46 fewer to 175 more)  | ⊕⊕○○<br>LOW      | CRITICAL |
| <b>Signs and symptoms/overall withdrawal syndrome (mild/moderate/severe withdrawal symptoms) at 12 months - Anxiety</b>      |                   |                      |                          |                         |                           |      |                   |       |                            |                                               |                  |          |
| 1                                                                                                                            | randomised trials | serious <sup>1</sup> | no serious inconsistency | no serious indirectness | serious <sup>2</sup>      | none | 47/159<br>(29.6%) | 20.1% | RR 1.47<br>(1 to 2.17)     | 94 more per 1000 (from 0 more to 235 more)    | ⊕⊕○○<br>LOW      | CRITICAL |
| <b>Signs and symptoms/overall withdrawal syndrome (mild/moderate/severe withdrawal symptoms) at 12 months - Convulsions</b>  |                   |                      |                          |                         |                           |      |                   |       |                            |                                               |                  |          |
| 1                                                                                                                            | randomised trials | serious <sup>1</sup> | no serious inconsistency | no serious indirectness | no serious imprecision    | none | 0/159<br>(0%)     | 0%    | not pooled                 | not pooled                                    | ⊕⊕⊕○<br>MODERATE | CRITICAL |
| <b>Rates of lapse/relapse (benzodiazepine use at 36 months in those who stopped use at 12 months)</b>                        |                   |                      |                          |                         |                           |      |                   |       |                            |                                               |                  |          |
| 1                                                                                                                            | randomised trials | serious <sup>1</sup> | no serious inconsistency | no serious indirectness | very serious <sup>2</sup> | none | 27/76<br>(35.5%)  | 30.8% | RR 1.15<br>(0.6 to 2.21)   | 46 more per 1000 (from 123 fewer to 373 more) | ⊕○○○<br>VERY LOW | CRITICAL |

<sup>1</sup> Downgraded by 1 increment if the majority of the evidence was at high risk of bias, and downgraded by 2 increments if the majority of the evidence was at very high risk of bias

<sup>2</sup> Downgraded by 1 increment if the confidence interval crossed one MID or by 2 increments if the confidence interval crossed both MIDs

## 1.3.3 Z drugs

Table 111: Evidence profile: Alternatives to prescribing (Auricular acupuncture) versus Alternatives to prescribing (CBT for insomnia)

| Quality assessment                                                                                                                                                                |                   |                           |                          |                         |                           |                      | No of patients                                                                                            |         | Effect                 |                                                 | Quality          | Importance |
|-----------------------------------------------------------------------------------------------------------------------------------------------------------------------------------|-------------------|---------------------------|--------------------------|-------------------------|---------------------------|----------------------|-----------------------------------------------------------------------------------------------------------|---------|------------------------|-------------------------------------------------|------------------|------------|
| No of studies                                                                                                                                                                     | Design            | Risk of bias              | Inconsistency            | Indirectness            | Imprecision               | Other considerations | Alternatives to prescribing (Auricular acupuncture) versus Alternatives to prescribing (CBT for insomnia) | Control | Relative (95% CI)      | Absolute                                        |                  |            |
| <b>Cessation of medication (discontinuation of z-drugs) post treatment</b>                                                                                                        |                   |                           |                          |                         |                           |                      |                                                                                                           |         |                        |                                                 |                  |            |
| 1                                                                                                                                                                                 | randomised trials | very serious <sup>1</sup> | no serious inconsistency | no serious indirectness | serious <sup>2</sup>      | none                 | 17/24 (70.8%)                                                                                             | 84%     | RR 0.84 (0.62 to 1.15) | 134 fewer per 1000 (from 319 fewer to 126 more) | ⊕○○○<br>VERY LOW | CRITICAL   |
| <b>Reduction in prescribed drug use (in those who did not discontinue) post treatment</b>                                                                                         |                   |                           |                          |                         |                           |                      |                                                                                                           |         |                        |                                                 |                  |            |
| 1                                                                                                                                                                                 | randomised trials | very serious <sup>1</sup> | no serious inconsistency | no serious indirectness | very serious <sup>2</sup> | none                 | 7/7 (100%)                                                                                                | 100%    | RR 1 (0.71 to 1.41)    | 0 fewer per 1000 (from 290 fewer to 410 more)   | ⊕○○○<br>VERY LOW | CRITICAL   |
| <b>Quality of life - psychological health (sleep efficiency) post treatment (range of scores: 0-100; Better indicated by higher values)</b>                                       |                   |                           |                          |                         |                           |                      |                                                                                                           |         |                        |                                                 |                  |            |
| 1                                                                                                                                                                                 | randomised trials | very serious <sup>1</sup> | no serious inconsistency | no serious indirectness | no serious imprecision    | none                 | 24                                                                                                        | 25      | -                      | MD 16 lower (23.07 to 8.93 lower)               | ⊕⊕○○<br>LOW      | CRITICAL   |
| <b>Quality of life - psychological health (rated sleep quality) post treatment (range of scores: 0-5; Better indicated by higher values)</b>                                      |                   |                           |                          |                         |                           |                      |                                                                                                           |         |                        |                                                 |                  |            |
| 1                                                                                                                                                                                 | randomised trials | very serious <sup>1</sup> | no serious inconsistency | no serious indirectness | serious <sup>2</sup>      | none                 | 24                                                                                                        | 25      | -                      | MD 0.6 lower (1.04 to 0.16 lower)               | ⊕○○○<br>VERY LOW | CRITICAL   |
| <b>Signs and symptoms/overall withdrawal syndrome (insomnia) post treatment (measured with: Insomnia severity index; range of scores: 0-28; Better indicated by lower values)</b> |                   |                           |                          |                         |                           |                      |                                                                                                           |         |                        |                                                 |                  |            |
| 1                                                                                                                                                                                 | randomised trials | very serious <sup>1</sup> | no serious inconsistency | no serious indirectness | no serious imprecision    | none                 | 25                                                                                                        | 25      | -                      | MD 6.89 higher (4.14 to 9.64 higher)            | ⊕⊕○○<br>LOW      | CRITICAL   |
| <b>Signs and symptoms/overall withdrawal syndrome (Hospital anxiety and depression scale) post treatment - Anxiety (range of scores: 0-21; Better indicated by lower values)</b>  |                   |                           |                          |                         |                           |                      |                                                                                                           |         |                        |                                                 |                  |            |

|                                                                                                                                                                                       |                   |                           |                          |                         |                           |      |    |    |   |                                           |                  |          |
|---------------------------------------------------------------------------------------------------------------------------------------------------------------------------------------|-------------------|---------------------------|--------------------------|-------------------------|---------------------------|------|----|----|---|-------------------------------------------|------------------|----------|
| 1                                                                                                                                                                                     | randomised trials | very serious <sup>1</sup> | no serious inconsistency | no serious indirectness | serious <sup>2</sup>      | none | 25 | 25 | - | MD 0.55 lower (2.13 lower to 1.03 higher) | ⊕○○○<br>VERY LOW | CRITICAL |
| <b>Signs and symptoms/overall withdrawal syndrome (Hospital anxiety and depression scale) post treatment - Depression (range of scores: 0-21; Better indicated by lower values)</b>   |                   |                           |                          |                         |                           |      |    |    |   |                                           |                  |          |
| 1                                                                                                                                                                                     | randomised trials | very serious <sup>1</sup> | no serious inconsistency | no serious indirectness | serious <sup>2</sup>      | none | 25 | 25 | - | MD 0.35 lower (1.77 lower to 1.07 higher) | ⊕○○○<br>VERY LOW | CRITICAL |
| <b>Signs and symptoms/overall withdrawal syndrome (sleepiness) post treatment (measured with: Epworth sleepiness scale ; range of scores: 0-24; Better indicated by lower values)</b> |                   |                           |                          |                         |                           |      |    |    |   |                                           |                  |          |
| 1                                                                                                                                                                                     | randomised trials | very serious <sup>1</sup> | no serious inconsistency | no serious indirectness | serious <sup>2</sup>      | none | 25 | 25 | - | MD 1.1 lower (2.95 lower to 0.75 higher)  | ⊕○○○<br>VERY LOW | CRITICAL |
| <b>Signs and symptoms/overall withdrawal syndrome (insomnia) at 6 months (measured with: Insomnia severity index ; range of scores: 0-28; Better indicated by lower values)</b>       |                   |                           |                          |                         |                           |      |    |    |   |                                           |                  |          |
| 1                                                                                                                                                                                     | randomised trials | very serious <sup>1</sup> | no serious inconsistency | no serious indirectness | serious <sup>2</sup>      | none | 22 | 23 | - | MD 3.53 higher (0.47 to 6.59 higher)      | ⊕○○○<br>VERY LOW | CRITICAL |
| <b>Signs and symptoms/overall withdrawal syndrome (Hospital anxiety and depression scale) at 6 months - Anxiety (range of scores: 0-21; Better indicated by lower values)</b>         |                   |                           |                          |                         |                           |      |    |    |   |                                           |                  |          |
| 1                                                                                                                                                                                     | randomised trials | very serious <sup>1</sup> | no serious inconsistency | no serious indirectness | very serious <sup>2</sup> | none | 22 | 23 | - | MD 0.1 lower (1.82 lower to 1.62 higher)  | ⊕○○○<br>VERY LOW | CRITICAL |
| <b>Signs and symptoms/overall withdrawal syndrome (Hospital anxiety and depression scale) at 6 months - Depression (range of scores: 0-21; Better indicated by lower values)</b>      |                   |                           |                          |                         |                           |      |    |    |   |                                           |                  |          |
| 1                                                                                                                                                                                     | randomised trials | very serious <sup>1</sup> | no serious inconsistency | no serious indirectness | serious <sup>2</sup>      | none | 22 | 23 | - | MD 0.15 lower (1.55 lower to 1.25 higher) | ⊕○○○<br>VERY LOW | CRITICAL |
| <b>Signs and symptoms/overall withdrawal syndrome (sleepiness) at 6 months (measured with: Epworth sleepiness scale ; range of scores: 0-24; Better indicated by lower values)</b>    |                   |                           |                          |                         |                           |      |    |    |   |                                           |                  |          |
| 1                                                                                                                                                                                     | randomised trials | very serious <sup>1</sup> | no serious inconsistency | no serious indirectness | very serious <sup>2</sup> | none | 22 | 23 | - | MD 0.21 lower (1.85 lower to 1.43 higher) | ⊕○○○<br>VERY LOW | CRITICAL |

<sup>1</sup> Downgraded by 1 increment if the majority of the evidence was at high risk of bias, and downgraded by 2 increments if the majority of the evidence was at very high risk of bias

<sup>2</sup> Downgraded by 1 increment if the confidence interval crossed one MID or by 2 increments if the confidence interval crossed both MIDs



## 1.3.4 Antidepressants

Table 112: Evidence profile: Prescriber education/skills/knowledge/support (cessation advice) versus Usual care

| Quality assessment                                                                         |                   |                           |                          |                      |                           |                      | No of patients                                                                     |         | Effect                 |                                               | Quality          | Importance |
|--------------------------------------------------------------------------------------------|-------------------|---------------------------|--------------------------|----------------------|---------------------------|----------------------|------------------------------------------------------------------------------------|---------|------------------------|-----------------------------------------------|------------------|------------|
| No of studies                                                                              | Design            | Risk of bias              | Inconsistency            | Indirectness         | Imprecision               | Other considerations | Prescriber education/skills/knowledge/support (cessation advice) versus Usual care | Control | Relative (95% CI)      | Absolute                                      |                  |            |
| <b>Cessation of medication (discontinuation of antidepressants) at 12 months</b>           |                   |                           |                          |                      |                           |                      |                                                                                    |         |                        |                                               |                  |            |
| 1                                                                                          | randomised trials | very serious <sup>1</sup> | no serious inconsistency | serious <sup>2</sup> | very serious <sup>3</sup> | none                 | 4/67 (6%)                                                                          | 8%      | RR 0.75 (0.22 to 2.53) | 20 fewer per 1000 (from 62 fewer to 122 more) | ⊕○○○<br>VERY LOW | CRITICAL   |
| <b>Signs and symptoms/overall withdrawal syndrome (relapse of depression) at 12 months</b> |                   |                           |                          |                      |                           |                      |                                                                                    |         |                        |                                               |                  |            |
| 1                                                                                          | randomised trials | very serious <sup>1</sup> | no serious inconsistency | serious <sup>2</sup> | serious <sup>3</sup>      | none                 | 18/70 (25.7%)                                                                      | 13.2%   | RR 1.95 (0.97 to 3.94) | 125 more per 1000 (from 4 fewer to 388 more)  | ⊕○○○<br>VERY LOW | CRITICAL   |

<sup>1</sup> Downgraded by 1 increment if the majority of the evidence was at high risk of bias, and downgraded by 2 increments if the majority of the evidence was at very high risk of bias

<sup>2</sup> Downgraded by 1 or 2 increments because the majority of the evidence included an indirect population (downgrade by one increment) or a very indirect population (downgrade by two increments)

<sup>3</sup> Downgraded by 1 increment if the confidence interval crossed one MID or by 2 increments if the confidence interval crossed both MIDs

## 1.3.5 Mixed drugs

Table 113: Evidence profile: Alternatives to prescribing (CBT+therapeutic interactive voice response) versus Alternatives to prescribing (CBT only)

| Quality assessment                                                                                                                    |                   |                           |                          |                      |                           |                      | No of patients                                                                                                         |         | Effect                 |                                                 | Quality          | Importance |
|---------------------------------------------------------------------------------------------------------------------------------------|-------------------|---------------------------|--------------------------|----------------------|---------------------------|----------------------|------------------------------------------------------------------------------------------------------------------------|---------|------------------------|-------------------------------------------------|------------------|------------|
| No of studies                                                                                                                         | Design            | Risk of bias              | Inconsistency            | Indirectness         | Imprecision               | Other considerations | Alternatives to prescribing (CBT+therapeutic interactive voice response) versus Alternatives to prescribing (CBT only) | Control | Relative (95% CI)      | Absolute                                        |                  |            |
| <b>Reduction/cessation in prescribed drug use (number of patients taking prescribed drugs) post intervention - Opioids</b>            |                   |                           |                          |                      |                           |                      |                                                                                                                        |         |                        |                                                 |                  |            |
| 1                                                                                                                                     | randomised trials | very serious <sup>1</sup> | no serious inconsistency | serious <sup>2</sup> | serious <sup>3</sup>      | none                 | 10/26 (38.5%)                                                                                                          | 64%     | RR 0.6 (0.34 to 1.06)  | 256 fewer per 1000 (from 422 fewer to 38 more)  | ⊕○○○<br>VERY LOW | CRITICAL   |
| <b>Reduction/cessation in prescribed drug use (number of patients taking prescribed drugs) post intervention - Benzodiazepines</b>    |                   |                           |                          |                      |                           |                      |                                                                                                                        |         |                        |                                                 |                  |            |
| 1                                                                                                                                     | randomised trials | very serious <sup>1</sup> | no serious inconsistency | serious <sup>2</sup> | very serious <sup>3</sup> | none                 | 9/26 (34.6%)                                                                                                           | 40%     | RR 0.87 (0.42 to 1.77) | 52 fewer per 1000 (from 232 fewer to 308 more)  | ⊕○○○<br>VERY LOW | CRITICAL   |
| <b>Reduction/cessation in prescribed drug use (number of patients taking prescribed drugs) post intervention - Antidepressants</b>    |                   |                           |                          |                      |                           |                      |                                                                                                                        |         |                        |                                                 |                  |            |
| 1                                                                                                                                     | randomised trials | very serious <sup>1</sup> | no serious inconsistency | serious <sup>2</sup> | serious <sup>3</sup>      | none                 | 20/26 (76.9%)                                                                                                          | 84%     | RR 0.92 (0.7 to 1.2)   | 67 fewer per 1000 (from 252 fewer to 168 more)  | ⊕○○○<br>VERY LOW | CRITICAL   |
| <b>Reduction/cessation in prescribed drug use (number of patients taking prescribed drugs) at 8 month follow up - Opioids</b>         |                   |                           |                          |                      |                           |                      |                                                                                                                        |         |                        |                                                 |                  |            |
| 1                                                                                                                                     | randomised trials | very serious <sup>1</sup> | no serious inconsistency | serious <sup>2</sup> | serious <sup>3</sup>      | none                 | 11/26 (42.3%)                                                                                                          | 72%     | RR 0.59 (0.35 to 0.98) | 295 fewer per 1000 (from 14 fewer to 468 fewer) | ⊕○○○<br>VERY LOW | CRITICAL   |
| <b>Reduction/cessation in prescribed drug use (number of patients taking prescribed drugs) at 8 month follow up - Benzodiazepines</b> |                   |                           |                          |                      |                           |                      |                                                                                                                        |         |                        |                                                 |                  |            |
| 1                                                                                                                                     | randomised trials | very serious <sup>1</sup> | no serious inconsistency | serious <sup>2</sup> | very serious <sup>3</sup> | none                 | 9/26 (34.6%)                                                                                                           | 36%     | RR 0.96 (0.46 to 2.02) | 14 fewer per 1000 (from 194 fewer to 367 more)  | ⊕○○○<br>VERY LOW | CRITICAL   |
| <b>Reduction/cessation in prescribed drug use (number of patients taking prescribed drugs) at 8 month follow up - Antidepressants</b> |                   |                           |                          |                      |                           |                      |                                                                                                                        |         |                        |                                                 |                  |            |

|   |                   |                           |                          |                      |                      |      |                  |     |                          |                                                    |                  |          |
|---|-------------------|---------------------------|--------------------------|----------------------|----------------------|------|------------------|-----|--------------------------|----------------------------------------------------|------------------|----------|
| 1 | randomised trials | very serious <sup>1</sup> | no serious inconsistency | serious <sup>2</sup> | serious <sup>3</sup> | none | 17/26<br>(65.4%) | 76% | RR 0.86<br>(0.6 to 1.23) | 106 fewer per 1000<br>(from 304 fewer to 175 more) | ⊕○○○<br>VERY LOW | CRITICAL |
|---|-------------------|---------------------------|--------------------------|----------------------|----------------------|------|------------------|-----|--------------------------|----------------------------------------------------|------------------|----------|

<sup>1</sup> Downgraded by 1 increment if the majority of the evidence was at high risk of bias, and downgraded by 2 increments if the majority of the evidence was at very high risk of bias

<sup>2</sup> Downgraded by 1 or 2 increments because the majority of the evidence included an indirect population (downgrade by one increment) or a very indirect population (downgrade by two increments)

<sup>3</sup> Downgraded by 1 increment if the confidence interval crossed one MID or by 2 increments if the confidence interval crossed both MIDs

**Table 114: Evidence profile: Patient advice and support (intensive preventative programme) versus Usual care (no changes in drug use)**

| Quality assessment                                                                                 |                   |                           |                          |                      |                           |                      | No of patients                                                                                           | Effect  |                           |                                                   | Quality          | Importance |
|----------------------------------------------------------------------------------------------------|-------------------|---------------------------|--------------------------|----------------------|---------------------------|----------------------|----------------------------------------------------------------------------------------------------------|---------|---------------------------|---------------------------------------------------|------------------|------------|
| No of studies                                                                                      | Design            | Risk of bias              | Inconsistency            | Indirectness         | Imprecision               | Other considerations | Patient advice and support (intensive preventative programme) versus Usual care (no changes in drug use) | Control | Relative (95% CI)         | Absolute                                          |                  |            |
| <b>Reduction/cessation in prescribed drug use (regular use) at 12 months - Antidepressants</b>     |                   |                           |                          |                      |                           |                      |                                                                                                          |         |                           |                                                   |                  |            |
| 1                                                                                                  | randomised trials | very serious <sup>1</sup> | no serious inconsistency | serious <sup>2</sup> | very serious <sup>3</sup> | none                 | 25/259<br>(9.7%)                                                                                         | 10.8%   | RR 0.9<br>(0.54 to 1.49)  | 11 fewer per 1000<br>(from 50 fewer to 53 more)   | ⊕○○○<br>VERY LOW | CRITICAL   |
| <b>Reduction/cessation in prescribed drug use (regular use) at 12 months - Benzodiazepines</b>     |                   |                           |                          |                      |                           |                      |                                                                                                          |         |                           |                                                   |                  |            |
| 1                                                                                                  | randomised trials | very serious <sup>1</sup> | no serious inconsistency | serious <sup>2</sup> | serious <sup>3</sup>      | none                 | 22/259<br>(8.5%)                                                                                         | 17.8%   | RR 0.48<br>(0.3 to 0.77)  | 93 fewer per 1000<br>(from 41 fewer to 125 fewer) | ⊕○○○<br>VERY LOW | CRITICAL   |
| <b>Reduction/cessation in prescribed drug use (regular use) at 12 months - Opioids</b>             |                   |                           |                          |                      |                           |                      |                                                                                                          |         |                           |                                                   |                  |            |
| 1                                                                                                  | randomised trials | very serious <sup>1</sup> | no serious inconsistency | serious <sup>2</sup> | very serious <sup>3</sup> | none                 | 7/259<br>(2.7%)                                                                                          | 2.2%    | RR 1.21<br>(0.41 to 3.56) | 5 more per 1000<br>(from 13 fewer to 56 more)     | ⊕○○○<br>VERY LOW | CRITICAL   |
| <b>Reduction/cessation of prescribed medication (irregular use) at 12 months - Antidepressants</b> |                   |                           |                          |                      |                           |                      |                                                                                                          |         |                           |                                                   |                  |            |
| 1                                                                                                  | randomised trials | very serious <sup>1</sup> | no serious inconsistency | serious <sup>2</sup> | very serious <sup>3</sup> | none                 | 1/259<br>(0.39%)                                                                                         | 1.1%    | RR 0.35<br>(0.04 to 3.31) | 7 fewer per 1000<br>(from 11 fewer to 25 more)    | ⊕○○○<br>VERY LOW | CRITICAL   |
| <b>Reduction/cessation of prescribed medication (irregular use) at 12 months - Benzodiazepines</b> |                   |                           |                          |                      |                           |                      |                                                                                                          |         |                           |                                                   |                  |            |

|                                                                                            |                   |                           |                          |                      |                      |      |                |       |                       |                                              |               |          |
|--------------------------------------------------------------------------------------------|-------------------|---------------------------|--------------------------|----------------------|----------------------|------|----------------|-------|-----------------------|----------------------------------------------|---------------|----------|
| 1                                                                                          | randomised trials | very serious <sup>1</sup> | no serious inconsistency | serious <sup>2</sup> | serious <sup>3</sup> | none | 56/259 (21.6%) | 19.7% | RR 1.1 (0.79 to 1.53) | 20 more per 1000 (from 41 fewer to 104 more) | ⊕○○○ VERY LOW | CRITICAL |
| <b>Reduction/cessation of prescribed medication (irregular use) at 12 months - Opioids</b> |                   |                           |                          |                      |                      |      |                |       |                       |                                              |               |          |
| 1                                                                                          | randomised trials | very serious <sup>1</sup> | no serious inconsistency | serious <sup>2</sup> | serious <sup>3</sup> | none | 20/259 (7.7%)  | 3%    | RR 2.6 (1.16 to 5.79) | 48 more per 1000 (from 5 more to 144 more)   | ⊕○○○ VERY LOW | CRITICAL |

<sup>1</sup> Downgraded by 1 increment if the majority of the evidence was at high risk of bias, and downgraded by 2 increments if the majority of the evidence was at very high risk of bias

<sup>2</sup> Downgraded by 1 or 2 increments because the majority of the evidence included an indirect population (downgrade by one increment) or a very indirect population (downgrade by two increments)

<sup>3</sup> Downgraded by 1 increment if the confidence interval crossed one MID or by 2 increments if the confidence interval crossed both MIDs

**Table 115: Evidence profile: Patient advice and support (motivational interviewing) versus Usual care (information booklet about prescription drugs in general)**

| Quality assessment                                                                                                                          |                   |                           |                          |                      |                      |                      | No of patients                                                                                                                     |         |                        | Effect                                       |               | Quality  | Importance |
|---------------------------------------------------------------------------------------------------------------------------------------------|-------------------|---------------------------|--------------------------|----------------------|----------------------|----------------------|------------------------------------------------------------------------------------------------------------------------------------|---------|------------------------|----------------------------------------------|---------------|----------|------------|
| No of studies                                                                                                                               | Design            | Risk of bias              | Inconsistency            | Indirectness         | Imprecision          | Other considerations | Patient advice and support (motivational interviewing) versus Usual care (information booklet about prescription drugs in general) | Control | Relative (95% CI)      | Absolute                                     |               |          |            |
| <b>Reduction/cessation in prescribed drug use (difference in defined daily dose) (follow-up 3 months; Better indicated by lower values)</b> |                   |                           |                          |                      |                      |                      |                                                                                                                                    |         |                        |                                              |               |          |            |
| 1                                                                                                                                           | randomised trials | very serious <sup>1</sup> | no serious inconsistency | serious <sup>2</sup> | serious <sup>3</sup> | none                 | 55                                                                                                                                 | 62      | -                      | MD 0.3 higher (0.49 lower to 1.09 higher)    | ⊕○○○ VERY LOW | CRITICAL |            |
| <b>Cessation of medication (discontinuation) (follow-up 3 months)</b>                                                                       |                   |                           |                          |                      |                      |                      |                                                                                                                                    |         |                        |                                              |               |          |            |
| 1                                                                                                                                           | randomised trials | very serious <sup>1</sup> | no serious inconsistency | serious <sup>2</sup> | serious <sup>3</sup> | none                 | 10/56 (17.9%)                                                                                                                      | 8.6%    | RR 2.08 (0.81 to 5.38) | 93 more per 1000 (from 16 fewer to 377 more) | ⊕○○○ VERY LOW | CRITICAL |            |

<sup>1</sup> Downgraded by 1 increment if the majority of the evidence was at high risk of bias, and downgraded by 2 increments if the majority of the evidence was at very high risk of bias

<sup>2</sup> Downgraded by 1 or 2 increments because the majority of the evidence included an indirect population (downgrade by one increment) or a very indirect population (downgrade by two increments)

<sup>3</sup> Downgraded by 1 increment if the confidence interval crossed one MID or by 2 increments if the confidence interval crossed both MIDs

## 1.4 Patients' experience – GRADE CERQual

Table 116: Qualitative studies with thematic analysis(1-3)

| Study design and sample size                                                                         |             |                                                                                                                                                                                                                                                    | Quality assessment |                                     |                                  |
|------------------------------------------------------------------------------------------------------|-------------|----------------------------------------------------------------------------------------------------------------------------------------------------------------------------------------------------------------------------------------------------|--------------------|-------------------------------------|----------------------------------|
| No of studies contributing to the finding                                                            | Design      | Findings                                                                                                                                                                                                                                           | Criteria           | Rating                              | Overall assessment of confidence |
| Patients experience side effects with prescribed antidepressants                                     |             |                                                                                                                                                                                                                                                    |                    |                                     |                                  |
| 3                                                                                                    | Qualitative | Participants expressed severe emotional/mental side effects with antidepressants. Participants often felt that they were caught in a drug loop and reported feeling dependent on medication, and a fear that discontinuation could cause a crisis. | Limitations        | minor limitations                   | MODERATE                         |
|                                                                                                      |             |                                                                                                                                                                                                                                                    | Coherence          | no concerns about coherence         |                                  |
|                                                                                                      |             |                                                                                                                                                                                                                                                    | Relevance          | no concerns about relevance         |                                  |
|                                                                                                      |             |                                                                                                                                                                                                                                                    | Adequacy           | minor concerns about adequacy       |                                  |
| Patients experience withdrawal symptoms with prescribed antidepressants                              |             |                                                                                                                                                                                                                                                    |                    |                                     |                                  |
| 1                                                                                                    | Qualitative | Participants were reluctant to discontinue medications influenced by previous negative experiences of withdrawal from antidepressants.                                                                                                             | Limitations        | no limitations                      | LOW                              |
|                                                                                                      |             |                                                                                                                                                                                                                                                    | Coherence          | minor concerns about coherence      |                                  |
|                                                                                                      |             |                                                                                                                                                                                                                                                    | Relevance          | no concerns about relevance         |                                  |
|                                                                                                      |             |                                                                                                                                                                                                                                                    | Adequacy           | substantial concerns about adequacy |                                  |
| Patients on antidepressants experience difficulty in accessing and engaging in treatment and support |             |                                                                                                                                                                                                                                                    |                    |                                     |                                  |
| 2                                                                                                    | Qualitative | Participants described prescribers not listening to their concerns.                                                                                                                                                                                | Limitations        | minor limitations                   | MODERATE                         |
|                                                                                                      |             |                                                                                                                                                                                                                                                    | Coherence          | no concerns about coherence         |                                  |
|                                                                                                      |             |                                                                                                                                                                                                                                                    | Relevance          | no concerns about relevance         |                                  |
|                                                                                                      |             |                                                                                                                                                                                                                                                    | Adequacy           | minor concerns about adequacy       |                                  |

Table 117: Studies based on online information(4-8)

| Study design and sample size                                                                                |                                                                                                                                                            | Findings                                                                                                                                                                                                                                                         | Quality assessment |                             |                                  |
|-------------------------------------------------------------------------------------------------------------|------------------------------------------------------------------------------------------------------------------------------------------------------------|------------------------------------------------------------------------------------------------------------------------------------------------------------------------------------------------------------------------------------------------------------------|--------------------|-----------------------------|----------------------------------|
| No of studies contributing to the finding                                                                   | Design                                                                                                                                                     |                                                                                                                                                                                                                                                                  | Criteria           | Rating                      | Overall assessment of confidence |
| <b>Patients experience side effects with prescribed antidepressants</b>                                     |                                                                                                                                                            |                                                                                                                                                                                                                                                                  |                    |                             |                                  |
| 2                                                                                                           | 1 online survey; 1 analysis of postings on a health related website.                                                                                       | Participants experienced negative physical, emotional, sexual and social side effects with antidepressants.                                                                                                                                                      | Limitations        | severe limitations          | LOW                              |
|                                                                                                             |                                                                                                                                                            |                                                                                                                                                                                                                                                                  | Coherence          | no concerns about coherence |                                  |
|                                                                                                             |                                                                                                                                                            |                                                                                                                                                                                                                                                                  | Relevance          | no concerns about relevance |                                  |
|                                                                                                             |                                                                                                                                                            |                                                                                                                                                                                                                                                                  | Adequacy           | no concerns about adequacy  |                                  |
| <b>Patients experience withdrawal symptoms with prescribed antidepressants</b>                              |                                                                                                                                                            |                                                                                                                                                                                                                                                                  |                    |                             |                                  |
| 3                                                                                                           | 1 qualitative google searches of relevant websites; 1 analysis of postings on a health related website; 1 posts from an antidepressant withdrawal website. | Participants experienced a range of physical and mental side effects when discontinuing antidepressants.                                                                                                                                                         | Limitations        | severe limitations          | LOW                              |
|                                                                                                             |                                                                                                                                                            |                                                                                                                                                                                                                                                                  | Coherence          | no concerns about coherence |                                  |
|                                                                                                             |                                                                                                                                                            |                                                                                                                                                                                                                                                                  | Relevance          | no concerns about relevance |                                  |
|                                                                                                             |                                                                                                                                                            |                                                                                                                                                                                                                                                                  | Adequacy           | no concerns about adequacy  |                                  |
| <b>Patients on antidepressants experience difficulty in accessing and engaging in treatment and support</b> |                                                                                                                                                            |                                                                                                                                                                                                                                                                  |                    |                             |                                  |
| 3                                                                                                           | 2 online surveys; 1analysis of postings on a health related website.                                                                                       | Participants experience was that there was not sufficient/lack of information offered on the side effects and withdrawal associated with the antidepressants and they felt frustrated at not being listened to by their physicians or not being taken seriously. | Limitations        | severe limitations          | LOW                              |
|                                                                                                             |                                                                                                                                                            |                                                                                                                                                                                                                                                                  | Coherence          | no concerns about coherence |                                  |
|                                                                                                             |                                                                                                                                                            |                                                                                                                                                                                                                                                                  | Relevance          | no concerns about relevance |                                  |
|                                                                                                             |                                                                                                                                                            |                                                                                                                                                                                                                                                                  | Adequacy           | no concerns about adequacy  |                                  |

**Table 118: Grey literature reports(9-12)**

| Study design and sample size                                                                                                               |                                                  | Findings                                                                                                                                                                                              | Quality assessment |                             |                                  |
|--------------------------------------------------------------------------------------------------------------------------------------------|--------------------------------------------------|-------------------------------------------------------------------------------------------------------------------------------------------------------------------------------------------------------|--------------------|-----------------------------|----------------------------------|
| No of studies contributing to the finding                                                                                                  | Design                                           |                                                                                                                                                                                                       | Criteria           | Rating                      | Overall assessment of confidence |
| Patients experience side effects with prescribed benzodiazepines, z-drugs, opioids and antidepressants                                     |                                                  |                                                                                                                                                                                                       |                    |                             |                                  |
| 3                                                                                                                                          | 2 reports; 1 HTA (qualitative and mixed methods) | Participants felt that there were diverse physical symptoms due to withdrawal.                                                                                                                        | Limitations        | minor limitations           | HIGH                             |
|                                                                                                                                            |                                                  |                                                                                                                                                                                                       | Coherence          | no concerns about coherence |                                  |
|                                                                                                                                            |                                                  |                                                                                                                                                                                                       | Relevance          | no concerns about relevance |                                  |
|                                                                                                                                            |                                                  |                                                                                                                                                                                                       | Adequacy           | no concerns about adequacy  |                                  |
| Patients experience withdrawal symptoms with prescribed benzodiazepines, z-drugs, opioids and antidepressants                              |                                                  |                                                                                                                                                                                                       |                    |                             |                                  |
| 3                                                                                                                                          | 2 reports; 1 HTA (qualitative and mixed methods) | Participants described withdrawal as incapacitating and disabling and experienced a negative impact on relationships and social life, occupational impact and emotional impact with prescribed drugs. | Limitations        | minor limitations           | HIGH                             |
|                                                                                                                                            |                                                  |                                                                                                                                                                                                       | Coherence          | no concerns about coherence |                                  |
|                                                                                                                                            |                                                  |                                                                                                                                                                                                       | Relevance          | no concerns about relevance |                                  |
|                                                                                                                                            |                                                  |                                                                                                                                                                                                       | Adequacy           | no concerns about adequacy  |                                  |
| Patients on benzodiazepines, z-drugs, opioids and antidepressants experience difficulty in accessing and engaging in treatment and support |                                                  |                                                                                                                                                                                                       |                    |                             |                                  |
| 3                                                                                                                                          | 2 reports; 1 HTA (mixed methods)                 | Participants felt that there was lack of access to effective management and informed medical oversight of dependence and withdrawal process.                                                          | Limitations        | minor limitations           | HIGH                             |
|                                                                                                                                            |                                                  |                                                                                                                                                                                                       | Coherence          | no concerns about coherence |                                  |
|                                                                                                                                            |                                                  |                                                                                                                                                                                                       | Relevance          | no concerns about relevance |                                  |
|                                                                                                                                            |                                                  |                                                                                                                                                                                                       | Adequacy           | no concerns about adequacy  |                                  |

**REFERENCES**

1. Dickinson R, Knapp P, House AO, Dimri V, Zermansky A, Petty D, et al. Long-term prescribing of antidepressants in the older population: a qualitative study. *Br J Gen Pract.* 2010; **60**: e144-55.
2. Bayliss P, Holtum S. Experiences of antidepressant medication and cognitive-behavioural therapy for depression: a grounded theory study. *Psychol Psychother.* 2015; **88**: 317-34.
3. Schofield P, Crosland A, Waheed W, Waquas A, Aseem S, Gask L, et al. Patients' views of antidepressants: from first experiences to becoming expert. *Br J Gen Pract.* 2011; **61**: 142-48.
4. Belaise C, Gatti A, Chouinard V-A, Chouinard G. Patient online report of selective serotonin reuptake inhibitor-induced persistent postwithdrawal anxiety and mood disorders. *Psychother Psychosom.* 2012; **81**: 386-68.
5. Pestello FG, Davis-Berman J. Taking anti-depressant medication: A qualitative examination of internet postings. *Journal of Mental Health.* 2008; **17**: 349-60.
6. Read J, Gee A, Diggle J, Butler H. The interpersonal adverse effects reported by 1008 users of antidepressants; and the incremental impact of polypharmacy. *Psychiatry Res.* 2017; **256**: 423-27.
7. Read J, Gee A, Diggle J, Butler H. Staying on, and coming off, antidepressants: The experiences of 752 UK adults. *Addict Behav.* 2019; **88**: 82-85.
8. Stockmann T, Odegbaro D, Timimi S, Moncrieff J. SSRI and SNRI withdrawal symptoms reported on an internet forum. *Int J Risk Saf Med.* 2018; **29**: 175-80.
9. Guy A, Brown M, Lewis S, Reid S, Epsley K, Cope D, et al. The Patient Voice: an analysis of personal accounts of prescribed drug dependence and withdrawal submitted to petitions in Scotland and Wales. 2018.
10. Davies J, Pauli R, Montagu L, Lindsay RP, Raymond-Barker B. Antidepressant withdrawal: a survey of patients' experience by the All-Party Parliamentary Group for Prescribed Drug Dependence. 2018.
11. Avery AJ, Anderson C, Bond CM, Fortnum H, Gifford A, Hannaford PC, et al. Evaluation of patient reporting of adverse drug reactions to the UK 'Yellow Card Scheme': literature review, descriptive and qualitative analyses, and questionnaire surveys. *Health Technology Assessment (Winchester, England).* 2011; **15**: 1-234, iii-iv.
12. British Medical Association. Prescribed drugs associated with dependence and withdrawal – building a consensus for action. Analysis report. Evidence resource. London: British Medical Association. 2015.



## 1.5 Current practice service examples

GRADE assessment was not possible for this data.

**Table S6.** Summary of evidence on patients' reports of antidepressant-associated side-effects, withdrawal symptoms and treatment services

| Study/date   | Design                                   | Data                             | Summary of patient reports and experiences of antidepressants                                                                                |                                                                                                                                                                                                                                                                                                                                                                                                  |                                                                                                                                                                                                                                                                              |
|--------------|------------------------------------------|----------------------------------|----------------------------------------------------------------------------------------------------------------------------------------------|--------------------------------------------------------------------------------------------------------------------------------------------------------------------------------------------------------------------------------------------------------------------------------------------------------------------------------------------------------------------------------------------------|------------------------------------------------------------------------------------------------------------------------------------------------------------------------------------------------------------------------------------------------------------------------------|
|              |                                          |                                  | Side-effects/adverse drug reactions/concerns                                                                                                 | Withdrawal symptoms following dose reduction/cessation                                                                                                                                                                                                                                                                                                                                           | Views of treatment/services                                                                                                                                                                                                                                                  |
| Avery 2011   | Mixed methods                            | 270 patient yellow card reports  | (Severe) agitation, feeling stressed, nervous, mood swings, paranoia. Recurrent suicidal thinking.                                           | Sudden change in emotion/mood, insomnia, excessive anxiety, agitation, sweating/palpitations; bouts of stomach upsets, nausea, dizziness, aching joint/flu symptoms, headache, disorientation, aggression. Irritable bowel symptoms, electric shock-like sensations, confusion. Balance problems, no appetite, stomach pain.                                                                     | Many favourable comments about doctors. Small minority felt GP had not known about the risk of side-effects or had not understood them or ignored them.                                                                                                                      |
| Bayliss 2015 | Qualitative study with thematic analysis | 12 patients                      | Several participants felt they were dependent on medication, feeling fragile and worried that a crisis would ensue if this was discontinued. | Felt like losing you mind when coming off and getting really depressed.                                                                                                                                                                                                                                                                                                                          | One participant commented that dose adjustment and medication switches left them feeling they were: "stuck in a loop where they just prescribe [to] you". Brief consultations felt not adequate to address needs. Perception that underlying cause of illness not addressed. |
| Belaise 2012 | Analysis of website posts                | 12 patients who had discontinued | Not an aim of the study.                                                                                                                     | Most frequent symptoms reported significant persistent post withdrawal emergent symptoms including anxiety, panic, insomnia, depression, mood swings, irritability, impaired concentration/memory.                                                                                                                                                                                               | Not an aim of the study.                                                                                                                                                                                                                                                     |
| Davies 2018  | On-line survey/mixed methods             | 186 respondents                  | Not an aim of the study.                                                                                                                     | Withdrawal perceived as incapacitating and disabling which impacted on all aspects of personal, social, occupational functioning and finances. Withdrawal placing great strain on relationships, with friends lost due to isolation, and dependence on carers. Many reports of withdrawal as protracted and sometimes unbearable process, often unsuccessful causing pessimism and hopelessness. | Many reports expressing disillusionment with medicine and medical professionals due to not being adequately informed before treatment of the risk of withdrawal, and being offered no adequate withdrawal management and support.                                            |

continued .../

Table S6: continued .../

| Summary of patient reports and experiences of antidepressants |                                                   |                                                                                  |                                                                                                                                                                                                                                                              |                                                                                                                                                                                              |                                                                                                                                                                                                                                                   |
|---------------------------------------------------------------|---------------------------------------------------|----------------------------------------------------------------------------------|--------------------------------------------------------------------------------------------------------------------------------------------------------------------------------------------------------------------------------------------------------------|----------------------------------------------------------------------------------------------------------------------------------------------------------------------------------------------|---------------------------------------------------------------------------------------------------------------------------------------------------------------------------------------------------------------------------------------------------|
| Study/date                                                    | Design                                            | Data                                                                             | Side-effects/adverse drug reactions/concerns                                                                                                                                                                                                                 | Withdrawal symptoms following dose reduction/cessation                                                                                                                                       | Views of treatment/services                                                                                                                                                                                                                       |
| Dickenson 2010                                                | Qualitative study with semi-structured interviews | 36 patients (aged over 75)                                                       | Not an aim of the study.                                                                                                                                                                                                                                     | Reports of unsuccessful attempts to discontinue antidepressants. Anxiety about attempting to withdraw.                                                                                       | Belief (often with some acceptance) that antidepressant medication will be for rest of life, so adherent to prescription. Doctors believed to see depression as general condition of old age. Medication not addressed at annual clinical review. |
| Guy 2018                                                      | Mixed-methods                                     | 158 petition submissions<br><br>People taking antidepressants or benzodiazepines | Belief that over time medication has no effect and cause anxiety, depression, suicidal thoughts and anger. Mood swings. Deteriorated mood after dose increase. Side-effects persisting for years.                                                            | Followed 4-week taper and felt "...mental and physical anguish." Suffering feels intolerable, debilitating symptoms, left bed-ridden. Unable to work. Lost all savings, risk of losing home. | Wish had been offered talking therapy 17 years ago. Doctor did not warn about side-effects. Feeling that clinicians do not agree about diagnosis and treatment. Sough second opinion; felt understood which was vital.                            |
| Pestello 2008                                                 | Analysis of online forum posts                    | 227 posts on health-related website                                              | Vivid nightmares, night sweats. Weight gain. Acute anxiety, Palpitations. Loss of sex drive, sexual dysfunction. Memory loss. Hallucinations.                                                                                                                | Dizzy spells. Nausea. Lips numb. More anxious and depressed. Feel electric shocks.                                                                                                           | Felt not listened to and taken seriously by doctors. Feel "I am a number and not a name". "...doctors can't seem to help me."                                                                                                                     |
| Read 2017                                                     | Analysis of an on-line survey                     | 1,008 respondents                                                                | Medication causing drowsiness, tiredness, and fatigue causing problems with concentration and memory and negatively impacting on personal, social and occupational functioning. Blunting of affect. "...makes me totally disconnected...". No sexual desire. | Not an aim of the study.                                                                                                                                                                     | Pros and cons of medication should have been emphasised. Risk of side-effects not explained very well, or not discussed. Had to obtain information myself.                                                                                        |

Table S6. continued .../

| Summary of patient reports and experiences of antidepressants |                                          |                 |                                                                                                                                                      |                                                                                                                                                                                                                                                          |                                                                                                                                                                                                                                 |
|---------------------------------------------------------------|------------------------------------------|-----------------|------------------------------------------------------------------------------------------------------------------------------------------------------|----------------------------------------------------------------------------------------------------------------------------------------------------------------------------------------------------------------------------------------------------------|---------------------------------------------------------------------------------------------------------------------------------------------------------------------------------------------------------------------------------|
| Study/date                                                    | Design                                   | Data            | Side-effects/adverse drug reactions/concerns                                                                                                         | Withdrawal symptoms following dose reduction/cessation                                                                                                                                                                                                   | Views of treatment/services                                                                                                                                                                                                     |
| Read 2018                                                     | Analysis of an on-line survey            | 752 respondents | Not an aim of the study.                                                                                                                             | Not an aim of the study.                                                                                                                                                                                                                                 | Mixed: some positive reports relating to regular GP monitoring; some negative reports of receiving repeat prescriptions only with no or little monitoring and interest in doing so.                                             |
| Schofield 2011                                                | Qualitative study with thematic analysis | 65 patients     | Fear of addiction, stigma, cost and experience of side-effects (felt numb and abnormal) led some to experiment with timing and dosing of medication. | "...biggest side effect is every time when I stop I become a lot worse than what I was to begin with."                                                                                                                                                   | Felt unable to contribute to initial discussion with GP, but most expected to get better. Longer-term users reported good relationship with GP, as they became an expertise in their own treatment, some reluctant to come off. |
| Stockman 2018                                                 | On-line survey                           | 174 respondents | Not an aim of the study.                                                                                                                             | SSRI/SSNI withdrawal symptoms reported were grouped by system and grouped in descending order of frequency of report: neurological, gastrointestinal, musculoskeletal and cardiovascular. psychological, respiratory, psychosexual/genitourinary, other. | Not an aim of the study.                                                                                                                                                                                                        |
